# Supplementary material for: Genetic insight into the putative causal proteins and druggable targets of osteoporosis: a large-scale proteome-wide mendelian randomization study
Source: Front Genet. 2023 Jun 28;14:1161817. doi: 10.3389/fgene.2023.1161817 (PMC10336211; doi:10.3389/fgene.2023.1161817)
Supplement: Supplementary file 1 [file DataSheet1.xlsx]

## Sheet: Supp. table 1
Supplymentary table 1: instrumental variables (IVs) used in the MR study
exposure	samplesize.exposure	Protein_short_name	Protein_full_name	Gene	UniProt	Ensembl.Gene.ID	Entrez.Gene.ID	HGNC.ID	IVs_SNPs	effect_allele.exposure	other_allele.exposure	beta.exposure	se.exposure	eaf.exposure	chr	pos	pval.exposure	mr_keep.exposure	rsq.exposure	F_statistic
8479_4	35366	MMP-10	Stromelysin-2	MMP10	P09238	ENSG00000166670	4319	HGNC:7156	rs10895323	G	A	-0.171	0.0104916	0.19621	11	102470895	1.008e-59	TRUE	0.00745581	265.648
8479_4	35363	MMP-10	Stromelysin-2	MMP10	P09238	ENSG00000166670	4319	HGNC:7156	rs10895360	A	G	-0.1752	0.029867	0.02008	11	102624007	4.464e-09	TRUE	0.000972163	34.4101
8479_4	35363	MMP-10	Stromelysin-2	MMP10	P09238	ENSG00000166670	4319	HGNC:7156	rs111660559	G	A	-0.2139	0.03811	0.01253	11	103535302	1.992e-08	TRUE	0.000890085	31.5023
8479_4	35363	MMP-10	Stromelysin-2	MMP10	P09238	ENSG00000166670	4319	HGNC:7156	rs11225418	C	A	-0.1972	0.00953792	0.25644	11	102640805	5.773e-95	TRUE	0.0119444	427.471
8479_4	35364	MMP-10	Stromelysin-2	MMP10	P09238	ENSG00000166670	4319	HGNC:7156	rs11225445	G	T	0.1736	0.00859672	0.37119	11	102749448	1.111e-90	TRUE	0.0114003	407.788
8479_4	35363	MMP-10	Stromelysin-2	MMP10	P09238	ENSG00000166670	4319	HGNC:7156	rs11225662	A	G	-0.209	0.0126209	0.12558	11	103165299	1.359e-61	TRUE	0.00769545	274.229
8479_4	35364	MMP-10	Stromelysin-2	MMP10	P09238	ENSG00000166670	4319	HGNC:7156	rs11225814	A	C	0.0606	0.0083575	0.52321	11	103338845	4.138e-13	TRUE	0.0014846	52.5766
8479_4	35364	MMP-10	Stromelysin-2	MMP10	P09238	ENSG00000166670	4319	HGNC:7156	rs11225836	G	A	0.1419	0.0193473	0.04837	11	103362163	2.228e-13	TRUE	0.00151889	53.7927
8479_4	35364	MMP-10	Stromelysin-2	MMP10	P09238	ENSG00000166670	4319	HGNC:7156	rs112921184	A	G	0.2524	0.0255533	0.02638	11	102781534	5.218e-23	TRUE	0.00275138	97.5626
8479_4	35362	MMP-10	Stromelysin-2	MMP10	P09238	ENSG00000166670	4319	HGNC:7156	rs1144393	C	T	-0.1415	0.00873209	0.35188	11	102669409	4.679e-59	TRUE	0.00737142	262.589
8479_4	35364	MMP-10	Stromelysin-2	MMP10	P09238	ENSG00000166670	4319	HGNC:7156	rs116825246	T	C	-0.1887	0.030583	0.01875	11	102862159	6.825e-10	TRUE	0.00107542	38.07
8479_4	35364	MMP-10	Stromelysin-2	MMP10	P09238	ENSG00000166670	4319	HGNC:7156	rs116883973	A	G	-0.2606	0.0202405	0.04421	11	102796209	6.21e-38	TRUE	0.00466593	165.77
8479_4	35365	MMP-10	Stromelysin-2	MMP10	P09238	ENSG00000166670	4319	HGNC:7156	rs117029480	C	T	-0.1613	0.0272542	0.02451	11	102396880	3.252e-09	TRUE	0.000989513	35.0268
8479_4	35366	MMP-10	Stromelysin-2	MMP10	P09238	ENSG00000166670	4319	HGNC:7156	rs117050523	C	G	-0.3409	0.0348038	0.01495	11	102455333	1.184e-22	TRUE	0.0027056	95.9403
8479_4	35362	MMP-10	Stromelysin-2	MMP10	P09238	ENSG00000166670	4319	HGNC:7156	rs117084793	G	A	-0.1621	0.0232168	0.03395	11	102245931	2.91e-12	TRUE	0.00137673	48.7484
8479_4	35364	MMP-10	Stromelysin-2	MMP10	P09238	ENSG00000166670	4319	HGNC:7156	rs117268117	T	C	0.1829	0.0291829	0.02014	11	101903650	3.672e-10	TRUE	0.00110956	39.2799
8479_4	35364	MMP-10	Stromelysin-2	MMP10	P09238	ENSG00000166670	4319	HGNC:7156	rs117305757	T	C	0.2134	0.0200478	0.04472	11	102831969	1.849e-26	TRUE	0.00319395	113.306
8479_4	35366	MMP-10	Stromelysin-2	MMP10	P09238	ENSG00000166670	4319	HGNC:7156	rs117499439	T	A	0.1314	0.0207526	0.04193	11	102475136	2.424e-10	TRUE	0.00113238	40.091
8479_4	35362	MMP-10	Stromelysin-2	MMP10	P09238	ENSG00000166670	4319	HGNC:7156	rs117695939	A	G	0.2131	0.0198946	0.04585	11	103466530	8.992e-27	TRUE	0.00323429	114.736
8479_4	35362	MMP-10	Stromelysin-2	MMP10	P09238	ENSG00000166670	4319	HGNC:7156	rs117790160	T	C	0.1316	0.022843	0.03552	11	102292087	8.358e-09	TRUE	0.000937751	33.19
8479_4	35364	MMP-10	Stromelysin-2	MMP10	P09238	ENSG00000166670	4319	HGNC:7156	rs118002538	A	G	0.2855	0.0236963	0.03302	11	103107657	1.98e-33	TRUE	0.00408823	145.161
8479_4	35361	MMP-10	Stromelysin-2	MMP10	P09238	ENSG00000166670	4319	HGNC:7156	rs118124532	T	G	-0.2655	0.0209376	0.04188	11	102167545	7.581e-37	TRUE	0.00452694	160.796
8479_4	35364	MMP-10	Stromelysin-2	MMP10	P09238	ENSG00000166670	4319	HGNC:7156	rs118186420	C	T	-0.277	0.0309435	0.01978	11	102655127	3.497e-19	TRUE	0.00226101	80.1349
8479_4	35364	MMP-10	Stromelysin-2	MMP10	P09238	ENSG00000166670	4319	HGNC:7156	rs12225514	A	C	-0.0848	0.00994516	0.22828	11	103369967	1.505e-17	TRUE	0.00205182	72.7057
8479_4	35364	MMP-10	Stromelysin-2	MMP10	P09238	ENSG00000166670	4319	HGNC:7156	rs12275686	A	G	0.1169	0.00899071	0.31612	11	102767396	1.187e-38	TRUE	0.00475809	169.06
8479_4	35363	MMP-10	Stromelysin-2	MMP10	P09238	ENSG00000166670	4319	HGNC:7156	rs12291145	C	A	0.1315	0.0154195	0.07736	11	103451587	1.487e-17	TRUE	0.00205255	72.7294
8479_4	35362	MMP-10	Stromelysin-2	MMP10	P09238	ENSG00000166670	4319	HGNC:7156	rs12361597	A	G	-0.1161	0.0171568	0.06359	11	102337777	1.315e-11	TRUE	0.00129335	45.792
8479_4	35367	MMP-10	Stromelysin-2	MMP10	P09238	ENSG00000166670	4319	HGNC:7156	rs12363310	G	T	-0.0501	0.00879532	0.34628	11	101742257	1.225e-08	TRUE	0.000916643	32.4468
8479_4	35364	MMP-10	Stromelysin-2	MMP10	P09238	ENSG00000166670	4319	HGNC:7156	rs12577612	G	A	0.0972	0.00865927	0.37118	11	102996987	3.075e-29	TRUE	0.00355049	126
8479_4	35363	MMP-10	Stromelysin-2	MMP10	P09238	ENSG00000166670	4319	HGNC:7156	rs1320633	C	T	0.2575	0.00845213	0.39014	11	102624885	1e-200	TRUE	0.0255767	928.158
8479_4	35366	MMP-10	Stromelysin-2	MMP10	P09238	ENSG00000166670	4319	HGNC:7156	rs138712324	C	G	-0.2469	0.00986152	0.23126	11	102503654	2.437e-138	TRUE	0.0174166	626.837
8479_4	35366	MMP-10	Stromelysin-2	MMP10	P09238	ENSG00000166670	4319	HGNC:7156	rs140411048	A	G	0.1744	0.027631	0.02284	11	102467357	2.759e-10	TRUE	0.00112525	39.8382
8479_4	35362	MMP-10	Stromelysin-2	MMP10	P09238	ENSG00000166670	4319	HGNC:7156	rs140444012	A	G	0.1247	0.0192725	0.04949	11	102152630	9.778e-11	TRUE	0.00118257	41.8654
8479_4	35364	MMP-10	Stromelysin-2	MMP10	P09238	ENSG00000166670	4319	HGNC:7156	rs142319904	G	C	-0.1327	0.0204315	0.04556	11	103012165	8.31e-11	TRUE	0.00119148	42.1835
8479_4	35363	MMP-10	Stromelysin-2	MMP10	P09238	ENSG00000166670	4319	HGNC:7156	rs142583321	T	C	0.118	0.016077	0.07226	11	102896319	2.141e-13	TRUE	0.00152114	53.8709
8479_4	35367	MMP-10	Stromelysin-2	MMP10	P09238	ENSG00000166670	4319	HGNC:7156	rs145355193	T	G	0.1952	0.0240998	0.0312	11	101726127	5.511e-16	TRUE	0.00185164	65.6046
8479_4	35364	MMP-10	Stromelysin-2	MMP10	P09238	ENSG00000166670	4319	HGNC:7156	rs146321510	G	A	-0.2496	0.0264793	0.0247	11	103378663	4.251e-21	TRUE	0.00250639	88.8538
8479_4	35364	MMP-10	Stromelysin-2	MMP10	P09238	ENSG00000166670	4319	HGNC:7156	rs147570253	T	C	-0.1395	0.0253105	0.02787	11	102101583	3.557e-08	TRUE	0.000858295	30.3771
8479_4	35364	MMP-10	Stromelysin-2	MMP10	P09238	ENSG00000166670	4319	HGNC:7156	rs149958938	C	T	-0.2679	0.041693	0.01021	11	101891273	1.314e-10	TRUE	0.00116621	41.2876
8479_4	35364	MMP-10	Stromelysin-2	MMP10	P09238	ENSG00000166670	4319	HGNC:7156	rs150077704	A	G	-0.3094	0.0405181	0.01174	11	102788663	2.239e-14	TRUE	0.00164623	58.31
8479_4	35364	MMP-10	Stromelysin-2	MMP10	P09238	ENSG00000166670	4319	HGNC:7156	rs150266249	G	A	0.2643	0.0292166	0.02051	11	103334291	1.48e-19	TRUE	0.00230884	81.8341
8479_4	35364	MMP-10	Stromelysin-2	MMP10	P09238	ENSG00000166670	4319	HGNC:7156	rs17099622	G	A	0.2719	0.0150664	0.08255	11	102700352	8.358e-73	TRUE	0.00912604	325.687
8479_4	35364	MMP-10	Stromelysin-2	MMP10	P09238	ENSG00000166670	4319	HGNC:7156	rs17099786	T	C	0.2049	0.028386	0.02158	11	102821497	5.262e-13	TRUE	0.0014713	52.1047
8479_4	35366	MMP-10	Stromelysin-2	MMP10	P09238	ENSG00000166670	4319	HGNC:7156	rs1711408	G	T	-0.164	0.0127714	0.12557	11	102490938	9.641e-38	TRUE	0.00464117	164.896
8479_4	35366	MMP-10	Stromelysin-2	MMP10	P09238	ENSG00000166670	4319	HGNC:7156	rs1711431	A	T	-0.0948	0.00885003	0.66739	11	102474069	8.957e-27	TRUE	0.00323414	114.743
8479_4	35363	MMP-10	Stromelysin-2	MMP10	P09238	ENSG00000166670	4319	HGNC:7156	rs17293152	A	G	-0.1132	0.0109971	0.18107	11	102633134	7.53e-25	TRUE	0.00298752	105.958
8479_4	35364	MMP-10	Stromelysin-2	MMP10	P09238	ENSG00000166670	4319	HGNC:7156	rs17359230	T	C	0.2784	0.0291819	0.02005	11	102642183	1.426e-21	TRUE	0.0025672	91.0148
8479_4	35363	MMP-10	Stromelysin-2	MMP10	P09238	ENSG00000166670	4319	HGNC:7156	rs17360292	T	C	-0.157	0.0204347	0.04392	11	102683288	1.554e-14	TRUE	0.00166653	59.0286
8479_4	35364	MMP-10	Stromelysin-2	MMP10	P09238	ENSG00000166670	4319	HGNC:7156	rs17860938	C	T	0.1172	0.0160074	0.07534	11	102652744	2.45e-13	TRUE	0.00151363	53.6061
8479_4	35364	MMP-10	Stromelysin-2	MMP10	P09238	ENSG00000166670	4319	HGNC:7156	rs17860955	C	T	-1.1145	0.0387205	0.01168	11	102649482	3.481e-182	TRUE	0.022892	828.473
8479_4	35365	MMP-10	Stromelysin-2	MMP10	P09238	ENSG00000166670	4319	HGNC:7156	rs17878383	G	C	0.0771	0.0138107	0.09771	11	102399596	2.369e-08	TRUE	0.000880536	31.1658
8479_4	35363	MMP-10	Stromelysin-2	MMP10	P09238	ENSG00000166670	4319	HGNC:7156	rs17881127	A	T	-0.2324	0.0185004	0.05262	11	102665166	3.421e-36	TRUE	0.00444274	157.801
8479_4	35364	MMP-10	Stromelysin-2	MMP10	P09238	ENSG00000166670	4319	HGNC:7156	rs181195900	A	G	-0.1544	0.018922	0.05293	11	103630156	3.356e-16	TRUE	0.00187934	66.5822
8479_4	35364	MMP-10	Stromelysin-2	MMP10	P09238	ENSG00000166670	4319	HGNC:7156	rs187376428	T	C	-0.3571	0.0311192	0.01917	11	102045946	1.757e-30	TRUE	0.00370998	131.681
8479_4	35364	MMP-10	Stromelysin-2	MMP10	P09238	ENSG00000166670	4319	HGNC:7156	rs1939536	C	G	0.1555	0.0255131	0.02644	11	102856823	1.095e-09	TRUE	0.0010494	37.1479
8479_4	35366	MMP-10	Stromelysin-2	MMP10	P09238	ENSG00000166670	4319	HGNC:7156	rs2509009	T	C	0.2115	0.0142212	0.09454	11	102519043	4.995e-50	TRUE	0.00621557	221.182
8479_4	35362	MMP-10	Stromelysin-2	MMP10	P09238	ENSG00000166670	4319	HGNC:7156	rs2604532	G	A	0.0759	0.00941449	0.72561	11	102150488	7.503e-16	TRUE	0.00183476	64.9965
8479_4	35364	MMP-10	Stromelysin-2	MMP10	P09238	ENSG00000166670	4319	HGNC:7156	rs3213460	A	G	0.2733	0.011693	0.1496	11	102668882	8.071e-121	TRUE	0.0152135	546.291
8479_4	35362	MMP-10	Stromelysin-2	MMP10	P09238	ENSG00000166670	4319	HGNC:7156	rs34510872	T	C	0.1123	0.0205848	0.0439	11	102248377	4.884e-08	TRUE	0.000840986	29.7623
8479_4	35363	MMP-10	Stromelysin-2	MMP10	P09238	ENSG00000166670	4319	HGNC:7156	rs3460	C	G	0.0924	0.0136587	0.10628	11	102208390	1.334e-11	TRUE	0.00129252	45.7639
8479_4	35365	MMP-10	Stromelysin-2	MMP10	P09238	ENSG00000166670	4319	HGNC:7156	rs35231465	A	G	0.1972	0.0279277	0.02267	11	102584135	1.652e-12	TRUE	0.00140794	49.859
8479_4	35364	MMP-10	Stromelysin-2	MMP10	P09238	ENSG00000166670	4319	HGNC:7156	rs4085170	A	G	0.1298	0.0113341	0.83315	11	102802722	2.294e-30	TRUE	0.00369512	131.152
8479_4	35365	MMP-10	Stromelysin-2	MMP10	P09238	ENSG00000166670	4319	HGNC:7156	rs4754047	G	C	-0.1862	0.0143314	0.90704	11	102434302	1.35e-38	TRUE	0.00475079	168.804
8479_4	35363	MMP-10	Stromelysin-2	MMP10	P09238	ENSG00000166670	4319	HGNC:7156	rs4754086	C	T	-0.0634	0.00868445	0.367	11	103451544	2.869e-13	TRUE	0.00150493	53.2959
8479_4	35363	MMP-10	Stromelysin-2	MMP10	P09238	ENSG00000166670	4319	HGNC:7156	rs514921	G	A	0.0511	0.00887535	0.33497	11	102669230	8.536e-09	TRUE	0.000936567	33.149
8479_4	35364	MMP-10	Stromelysin-2	MMP10	P09238	ENSG00000166670	4319	HGNC:7156	rs541997	G	A	-0.0648	0.0118544	0.14545	11	102781500	4.595e-08	TRUE	0.000844277	29.8805
8479_4	35364	MMP-10	Stromelysin-2	MMP10	P09238	ENSG00000166670	4319	HGNC:7156	rs558575	G	C	0.1004	0.00940167	0.73145	11	102850478	1.277e-26	TRUE	0.00321457	114.04
8479_4	35364	MMP-10	Stromelysin-2	MMP10	P09238	ENSG00000166670	4319	HGNC:7156	rs56354616	A	G	-0.3249	0.0276669	0.02448	11	102006270	7.645e-32	TRUE	0.00388466	137.905
8479_4	35364	MMP-10	Stromelysin-2	MMP10	P09238	ENSG00000166670	4319	HGNC:7156	rs588731	T	A	0.2017	0.0236532	0.96769	11	102679414	1.497e-17	TRUE	0.00205212	72.7162
8479_4	35366	MMP-10	Stromelysin-2	MMP10	P09238	ENSG00000166670	4319	HGNC:7156	rs59379441	T	C	0.132	0.0218975	0.03809	11	102460850	1.659e-09	TRUE	0.00102649	36.338
8479_4	35366	MMP-10	Stromelysin-2	MMP10	P09238	ENSG00000166670	4319	HGNC:7156	rs61138073	T	C	0.0849	0.0113767	0.16379	11	102502310	8.482e-14	TRUE	0.00157231	55.6907
8479_4	35361	MMP-10	Stromelysin-2	MMP10	P09238	ENSG00000166670	4319	HGNC:7156	rs61895428	T	C	0.107	0.0179011	0.05704	11	102304733	2.269e-09	TRUE	0.00100941	35.7278
8479_4	35364	MMP-10	Stromelysin-2	MMP10	P09238	ENSG00000166670	4319	HGNC:7156	rs61895434	T	C	0.1697	0.018968	0.05013	11	102351333	3.664e-19	TRUE	0.00225841	80.0427
8479_4	35364	MMP-10	Stromelysin-2	MMP10	P09238	ENSG00000166670	4319	HGNC:7156	rs61916047	T	C	0.1757	0.0303206	0.01923	11	101971466	6.843e-09	TRUE	0.000948676	33.5789
8479_4	35364	MMP-10	Stromelysin-2	MMP10	P09238	ENSG00000166670	4319	HGNC:7156	rs657043	C	T	0.3417	0.020542	0.04268	11	102661909	3.941e-62	TRUE	0.00776392	276.696
8479_4	35364	MMP-10	Stromelysin-2	MMP10	P09238	ENSG00000166670	4319	HGNC:7156	rs7107500	A	G	0.0792	0.00838505	0.54878	11	102352921	3.541e-21	TRUE	0.00251657	89.2153
8479_4	35366	MMP-10	Stromelysin-2	MMP10	P09238	ENSG00000166670	4319	HGNC:7156	rs72970217	G	A	-0.4087	0.0316598	0.0181	11	101756187	3.999e-38	TRUE	0.00469018	166.645
8479_4	35366	MMP-10	Stromelysin-2	MMP10	P09238	ENSG00000166670	4319	HGNC:7156	rs72971614	G	T	0.1269	0.0123496	0.13204	11	102489621	9.071e-25	TRUE	0.0029769	105.589
8479_4	35364	MMP-10	Stromelysin-2	MMP10	P09238	ENSG00000166670	4319	HGNC:7156	rs72987590	C	T	0.1583	0.0181817	0.05425	11	102922092	3.132e-18	TRUE	0.00213908	75.8044
8479_4	35363	MMP-10	Stromelysin-2	MMP10	P09238	ENSG00000166670	4319	HGNC:7156	rs7478816	G	A	0.179	0.0187198	0.05227	11	102619072	1.154e-21	TRUE	0.00257905	91.4336
8479_4	35364	MMP-10	Stromelysin-2	MMP10	P09238	ENSG00000166670	4319	HGNC:7156	rs75224233	G	C	-0.2034	0.0126906	0.12131	11	103437507	8.198e-58	TRUE	0.00721202	256.884
8479_4	35364	MMP-10	Stromelysin-2	MMP10	P09238	ENSG00000166670	4319	HGNC:7156	rs75358904	G	A	0.0813	0.0147574	0.09011	11	102034194	3.607e-08	TRUE	0.000857531	30.35
8479_4	35362	MMP-10	Stromelysin-2	MMP10	P09238	ENSG00000166670	4319	HGNC:7156	rs75495275	T	C	-0.0861	0.014462	0.09133	11	102305772	2.624e-09	TRUE	0.00100139	35.4447
8479_4	35365	MMP-10	Stromelysin-2	MMP10	P09238	ENSG00000166670	4319	HGNC:7156	rs76000784	A	G	0.1047	0.0154439	0.08018	11	102431842	1.207e-11	TRUE	0.00129797	45.9599
8479_4	35362	MMP-10	Stromelysin-2	MMP10	P09238	ENSG00000166670	4319	HGNC:7156	rs76054887	A	G	0.2421	0.0371683	0.01196	11	102305105	7.336e-11	TRUE	0.00119843	42.4273
8479_4	35364	MMP-10	Stromelysin-2	MMP10	P09238	ENSG00000166670	4319	HGNC:7156	rs77732802	A	G	0.1928	0.0336736	0.01607	11	103589947	1.031e-08	TRUE	0.000926179	32.7819
8479_4	35364	MMP-10	Stromelysin-2	MMP10	P09238	ENSG00000166670	4319	HGNC:7156	rs78282263	T	A	0.1045	0.0105054	0.19314	11	102897113	2.591e-23	TRUE	0.00279036	98.9489
8479_4	35364	MMP-10	Stromelysin-2	MMP10	P09238	ENSG00000166670	4319	HGNC:7156	rs7938241	C	G	0.0526	0.00915307	0.2953	11	103426813	9.1e-09	TRUE	0.00093303	33.0246
8479_4	35364	MMP-10	Stromelysin-2	MMP10	P09238	ENSG00000166670	4319	HGNC:7156	rs7945819	A	C	0.0803	0.0139322	0.09709	11	102389487	8.233e-09	TRUE	0.000938525	33.2193
6627_25	35379	LIPR1	Inactive pancreatic lipase-related protein 1	PNLIPRP1	P54315	ENSG00000187021	5407	HGNC:9156	rs12256872	A	G	-0.1164	0.0164595	0.06691	10	118378037	1.528e-12	TRUE	0.00141169	50.0121
6627_25	35378	LIPR1	Inactive pancreatic lipase-related protein 1	PNLIPRP1	P54315	ENSG00000187021	5407	HGNC:9156	rs12413392	C	G	0.1052	0.00970058	0.23091	10	118370434	2.113e-27	TRUE	0.00331349	117.608
6627_25	35376	LIPR1	Inactive pancreatic lipase-related protein 1	PNLIPRP1	P54315	ENSG00000187021	5407	HGNC:9156	rs17095060	T	C	-0.058	0.00889405	0.31506	10	118416207	6.974e-11	TRUE	0.00120075	42.5262
6627_25	35379	LIPR1	Inactive pancreatic lipase-related protein 1	PNLIPRP1	P54315	ENSG00000187021	5407	HGNC:9156	rs2915762	T	C	0.144	0.00829181	0.51507	10	118358659	1.479e-67	TRUE	0.00845315	301.596
6627_25	35375	LIPR1	Inactive pancreatic lipase-related protein 1	PNLIPRP1	P54315	ENSG00000187021	5407	HGNC:9156	rs74161804	C	A	0.1597	0.0155265	0.07559	10	118350394	8.179e-25	TRUE	0.00298191	105.795
6627_25	35373	LIPR1	Inactive pancreatic lipase-related protein 1	PNLIPRP1	P54315	ENSG00000187021	5407	HGNC:9156	rs77331202	T	C	0.1343	0.021902	0.03686	10	118351230	8.686e-10	TRUE	0.00106188	37.5997
6627_25	35379	LIPR1	Inactive pancreatic lipase-related protein 1	PNLIPRP1	P54315	ENSG00000187021	5407	HGNC:9156	rs79166686	G	A	0.2353	0.0386889	0.01135	10	118354973	1.188e-09	TRUE	0.00104447	36.989
6627_25	35378	LIPR1	Inactive pancreatic lipase-related protein 1	PNLIPRP1	P54315	ENSG00000187021	5407	HGNC:9156	rs80057036	C	T	-0.1501	0.0188751	0.04948	10	118192202	1.831e-15	TRUE	0.00178443	63.2389
15435_4	35333	PNP	Purine nucleoside phosphorylase	PNP	P00491	ENSG00000198805	4860	HGNC:7892	rs1049564	A	G	-0.1732	0.0110184	0.16518	14	20940606	1.117e-55	TRUE	0.00694511	247.094
15435_4	35336	PNP	Purine nucleoside phosphorylase	PNP	P00491	ENSG00000198805	4860	HGNC:7892	rs1713440	A	T	0.0471	0.00852849	0.35494	14	20875269	3.339e-08	TRUE	0.000862441	30.4998
15435_4	35326	PNP	Purine nucleoside phosphorylase	PNP	P00491	ENSG00000198805	4860	HGNC:7892	rs1760928	G	A	-0.0815	0.00965119	0.23685	14	20955695	3.052e-17	TRUE	0.00201469	71.3105
15435_4	35328	PNP	Purine nucleoside phosphorylase	PNP	P00491	ENSG00000198805	4860	HGNC:7892	rs1760933	C	T	-0.1876	0.0188173	0.95109	14	20945488	2.072e-23	TRUE	0.00280566	99.3916
15435_4	35333	PNP	Purine nucleoside phosphorylase	PNP	P00491	ENSG00000198805	4860	HGNC:7892	rs17879107	G	T	-0.1792	0.0324638	0.01635	14	20940360	3.39e-08	TRUE	0.000861684	30.4704
15435_4	35332	PNP	Purine nucleoside phosphorylase	PNP	P00491	ENSG00000198805	4860	HGNC:7892	rs61994226	T	C	-0.0757	0.0119916	0.13201	14	20980143	2.741e-10	TRUE	0.00112669	39.851
15435_4	35334	PNP	Purine nucleoside phosphorylase	PNP	P00491	ENSG00000198805	4860	HGNC:7892	rs74533796	T	C	-0.0842	0.0131875	0.10575	14	20927267	1.716e-10	TRUE	0.00115247	40.7659
15435_4	35337	PNP	Purine nucleoside phosphorylase	PNP	P00491	ENSG00000198805	4860	HGNC:7892	rs8015430	T	C	-0.0624	0.00862694	0.33105	14	20907439	4.719e-13	TRUE	0.00147845	52.3185
5867_60	35366	ARGI1	Arginase-1	ARG1	P05089	ENSG00000118520	383	HGNC:663	rs2608968	G	A	-0.065	0.00812972	0.38085	6	131809958	1.292e-15	TRUE	0.00180439	63.9257
5867_60	35366	ARGI1	Arginase-1	ARG1	P05089	ENSG00000118520	383	HGNC:663	rs2781668	T	C	-0.1115	0.00994865	0.1932	6	131897278	3.744e-29	TRUE	0.00353932	125.609
5867_60	35365	ARGI1	Arginase-1	ARG1	P05089	ENSG00000118520	383	HGNC:663	rs74812906	A	G	0.1822	0.0234658	0.02912	6	131897149	8.198e-15	TRUE	0.00170191	60.2872
5867_60	35363	ARGI1	Arginase-1	ARG1	P05089	ENSG00000118520	383	HGNC:663	rs7756633	T	C	0.1732	0.0273539	0.02146	6	132047826	2.423e-10	TRUE	0.0011325	40.0918
13397_88	35384	HBD-2	Beta-defensin 4A	DEFB4A	O15263	ENSG00000171711	100289462	HGNC:2767	rs117797877	T	C	0.2677	0.0241857	0.03061	8	8164592	1.783e-28	TRUE	0.00345061	122.512
13397_88	35383	HBD-2	Beta-defensin 4A	DEFB4A	O15263	ENSG00000171711	100289462	HGNC:2767	rs11784808	T	C	-0.1663	0.0222404	0.03397	8	8375526	7.582e-14	TRUE	0.00157777	55.9112
13397_88	35366	HBD-2	Beta-defensin 4A	DEFB4A	O15263	ENSG00000171711	100289462	HGNC:2767	rs11785619	T	C	0.1434	0.0257631	0.02719	8	8105346	2.605e-08	TRUE	0.000875308	30.9815
13397_88	35383	HBD-2	Beta-defensin 4A	DEFB4A	O15263	ENSG00000171711	100289462	HGNC:2767	rs11785930	C	T	0.0753	0.00950788	0.24489	8	8263629	2.38e-15	TRUE	0.00176963	62.7223
13397_88	35379	HBD-2	Beta-defensin 4A	DEFB4A	O15263	ENSG00000171711	100289462	HGNC:2767	rs12679021	G	A	0.1152	0.017724	0.94423	8	8736386	8.05e-11	TRUE	0.00119273	42.2456
13397_88	35382	HBD-2	Beta-defensin 4A	DEFB4A	O15263	ENSG00000171711	100289462	HGNC:2767	rs13249686	T	C	-0.1397	0.0203973	0.04362	8	8299399	7.44e-12	TRUE	0.00132408	46.908
13397_88	35384	HBD-2	Beta-defensin 4A	DEFB4A	O15263	ENSG00000171711	100289462	HGNC:2767	rs13273161	T	A	-0.0527	0.00886089	0.31313	8	8205234	2.723e-09	TRUE	0.000998734	35.3725
13397_88	35380	HBD-2	Beta-defensin 4A	DEFB4A	O15263	ENSG00000171711	100289462	HGNC:2767	rs143314302	C	A	-0.4638	0.0397408	0.01027	8	8438917	1.801e-31	TRUE	0.00383518	136.203
13397_88	35381	HBD-2	Beta-defensin 4A	DEFB4A	O15263	ENSG00000171711	100289462	HGNC:2767	rs144537232	A	G	-0.2525	0.0307908	0.01858	8	8441233	2.394e-16	TRUE	0.00189719	67.2481
13397_88	35382	HBD-2	Beta-defensin 4A	DEFB4A	O15263	ENSG00000171711	100289462	HGNC:2767	rs150358466	C	G	0.2177	0.0294271	0.02042	8	8714025	1.383e-13	TRUE	0.00154452	54.7297
13397_88	35350	HBD-2	Beta-defensin 4A	DEFB4A	O15263	ENSG00000171711	100289462	HGNC:2767	rs182834323	T	C	-0.1712	0.0292154	0.0219	8	6988854	4.631e-09	TRUE	0.000970502	34.3386
13397_88	35382	HBD-2	Beta-defensin 4A	DEFB4A	O15263	ENSG00000171711	100289462	HGNC:2767	rs28478802	A	G	-0.1085	0.0147307	0.08488	8	8669945	1.764e-13	TRUE	0.00153105	54.2515
13397_88	35382	HBD-2	Beta-defensin 4A	DEFB4A	O15263	ENSG00000171711	100289462	HGNC:2767	rs4840370	G	T	0.0472	0.00831936	0.42906	8	8691278	1.399e-08	TRUE	0.000908973	32.1887
13397_88	35383	HBD-2	Beta-defensin 4A	DEFB4A	O15263	ENSG00000171711	100289462	HGNC:2767	rs66932238	G	A	0.0928	0.015523	0.07445	8	8350606	2.256e-09	TRUE	0.0010091	35.739
13397_88	35373	HBD-2	Beta-defensin 4A	DEFB4A	O15263	ENSG00000171711	100289462	HGNC:2767	rs71509232	C	T	0.1387	0.024142	0.02874	8	6932485	9.182e-09	TRUE	0.0009323	33.0072
13397_88	35381	HBD-2	Beta-defensin 4A	DEFB4A	O15263	ENSG00000171711	100289462	HGNC:2767	rs73192219	A	G	0.1058	0.0169012	0.06311	8	8745992	3.852e-10	TRUE	0.00110639	39.1865
13397_88	35382	HBD-2	Beta-defensin 4A	DEFB4A	O15263	ENSG00000171711	100289462	HGNC:2767	rs73517985	T	C	0.0713	0.00991086	0.222	8	8657328	6.286e-13	TRUE	0.00146071	51.7555
13397_88	35381	HBD-2	Beta-defensin 4A	DEFB4A	O15263	ENSG00000171711	100289462	HGNC:2767	rs7824480	C	G	-0.0686	0.0109123	0.17167	8	8520663	3.247e-10	TRUE	0.0011158	39.5201
13397_88	35383	HBD-2	Beta-defensin 4A	DEFB4A	O15263	ENSG00000171711	100289462	HGNC:2767	rs7838279	A	G	-0.2638	0.0366383	0.01181	8	8370261	6.016e-13	TRUE	0.0014631	51.8417
15602_43	35362	IL-6 sRa	Interleukin-6 receptor subunit alpha	IL6R	P08887	ENSG00000160712	3570	HGNC:6019	rs10494299	G	A	-0.1256	0.016639	0.06722	1	153474243	4.402e-14	TRUE	0.00160884	56.9803
15602_43	35365	IL-6 sRa	Interleukin-6 receptor subunit alpha	IL6R	P08887	ENSG00000160712	3570	HGNC:6019	rs10494303	A	G	0.1133	0.00850475	0.41495	1	153893023	1.725e-40	TRUE	0.0049936	177.475
15602_43	35363	IL-6 sRa	Interleukin-6 receptor subunit alpha	IL6R	P08887	ENSG00000160712	3570	HGNC:6019	rs10796927	C	T	0.2894	0.00962089	0.24434	1	154630498	8.749e-199	TRUE	0.0249499	904.829
15602_43	35363	IL-6 sRa	Interleukin-6 receptor subunit alpha	IL6R	P08887	ENSG00000160712	3570	HGNC:6019	rs10908424	C	G	-0.2078	0.00910527	0.70111	1	154653273	2.777e-115	TRUE	0.0145154	520.841
15602_43	35361	IL-6 sRa	Interleukin-6 receptor subunit alpha	IL6R	P08887	ENSG00000160712	3570	HGNC:6019	rs10908429	T	C	0.1195	0.00922732	0.28073	1	154710904	2.329e-38	TRUE	0.00472095	167.72
15602_43	35365	IL-6 sRa	Interleukin-6 receptor subunit alpha	IL6R	P08887	ENSG00000160712	3570	HGNC:6019	rs111237020	T	C	0.395	0.0186944	0.04961	1	153842032	4.273e-99	TRUE	0.0124674	446.45
15602_43	35362	IL-6 sRa	Interleukin-6 receptor subunit alpha	IL6R	P08887	ENSG00000160712	3570	HGNC:6019	rs111875284	A	G	0.2939	0.0238885	0.03066	1	153424231	8.726e-35	TRUE	0.00426241	151.364
15602_43	35361	IL-6 sRa	Interleukin-6 receptor subunit alpha	IL6R	P08887	ENSG00000160712	3570	HGNC:6019	rs112042901	A	T	-0.4419	0.0289372	0.02185	1	154723854	1.193e-52	TRUE	0.00655211	233.204
15602_43	35364	IL-6 sRa	Interleukin-6 receptor subunit alpha	IL6R	P08887	ENSG00000160712	3570	HGNC:6019	rs11265621	A	G	0.5563	0.0147156	0.5997	1	154442960	1e-200	TRUE	0.0388435	1429.1
15602_43	35361	IL-6 sRa	Interleukin-6 receptor subunit alpha	IL6R	P08887	ENSG00000160712	3570	HGNC:6019	rs112730399	C	T	0.1612	0.0277466	0.02329	1	153556201	6.258e-09	TRUE	0.000953663	33.7528
15602_43	35364	IL-6 sRa	Interleukin-6 receptor subunit alpha	IL6R	P08887	ENSG00000160712	3570	HGNC:6019	rs113580743	A	G	-0.553	0.0214041	0.03805	1	154420333	3.479e-147	TRUE	0.0185267	667.508
15602_43	35362	IL-6 sRa	Interleukin-6 receptor subunit alpha	IL6R	P08887	ENSG00000160712	3570	HGNC:6019	rs113724571	T	C	0.2556	0.0347306	0.01467	1	153456535	1.846e-13	TRUE	0.0015294	54.1622
15602_43	35365	IL-6 sRa	Interleukin-6 receptor subunit alpha	IL6R	P08887	ENSG00000160712	3570	HGNC:6019	rs114324536	C	T	0.2438	0.0369762	0.01314	1	155188761	4.298e-11	TRUE	0.00122783	43.4732
15602_43	35364	IL-6 sRa	Interleukin-6 receptor subunit alpha	IL6R	P08887	ENSG00000160712	3570	HGNC:6019	rs114853077	T	C	0.2111	0.0290882	0.02145	1	154852735	3.951e-13	TRUE	0.00148716	52.6674
15602_43	35364	IL-6 sRa	Interleukin-6 receptor subunit alpha	IL6R	P08887	ENSG00000160712	3570	HGNC:6019	rs114973352	A	C	0.2619	0.0231557	0.0352	1	155037669	1.166e-29	TRUE	0.00360453	127.924
15602_43	35363	IL-6 sRa	Interleukin-6 receptor subunit alpha	IL6R	P08887	ENSG00000160712	3570	HGNC:6019	rs114980362	T	C	-0.4568	0.0236977	0.03238	1	154209281	8.52e-83	TRUE	0.0103986	371.57
15602_43	35362	IL-6 sRa	Interleukin-6 receptor subunit alpha	IL6R	P08887	ENSG00000160712	3570	HGNC:6019	rs115270699	A	G	0.1658	0.0206462	0.04131	1	153586191	9.704e-16	TRUE	0.00182048	64.4897
15602_43	35365	IL-6 sRa	Interleukin-6 receptor subunit alpha	IL6R	P08887	ENSG00000160712	3570	HGNC:6019	rs115582068	C	T	-0.4902	0.0269049	0.02288	1	153968441	3.599e-74	TRUE	0.00929988	331.959
15602_43	35364	IL-6 sRa	Interleukin-6 receptor subunit alpha	IL6R	P08887	ENSG00000160712	3570	HGNC:6019	rs11577167	T	C	-0.5215	0.0368655	0.01368	1	154480485	1.976e-45	TRUE	0.00562706	200.11
15602_43	35363	IL-6 sRa	Interleukin-6 receptor subunit alpha	IL6R	P08887	ENSG00000160712	3570	HGNC:6019	rs11577297	T	C	-0.0846	0.0109455	0.82458	1	154766100	1.082e-14	TRUE	0.00168661	59.741
15602_43	35365	IL-6 sRa	Interleukin-6 receptor subunit alpha	IL6R	P08887	ENSG00000160712	3570	HGNC:6019	rs11582489	A	G	-0.2941	0.0216148	0.03982	1	155134919	3.668e-42	TRUE	0.005208	185.135
15602_43	35362	IL-6 sRa	Interleukin-6 receptor subunit alpha	IL6R	P08887	ENSG00000160712	3570	HGNC:6019	rs11584256	T	C	0.3549	0.026191	0.02571	1	153410584	7.874e-42	TRUE	0.0051659	183.615
15602_43	35363	IL-6 sRa	Interleukin-6 receptor subunit alpha	IL6R	P08887	ENSG00000160712	3570	HGNC:6019	rs116043455	C	T	-0.2164	0.0216599	0.03819	1	155357296	1.672e-23	TRUE	0.00281484	99.8164
15602_43	35364	IL-6 sRa	Interleukin-6 receptor subunit alpha	IL6R	P08887	ENSG00000160712	3570	HGNC:6019	rs116059394	G	A	-0.4618	0.0192835	0.04965	1	154483655	9.702e-127	TRUE	0.0159593	573.505
15602_43	35364	IL-6 sRa	Interleukin-6 receptor subunit alpha	IL6R	P08887	ENSG00000160712	3570	HGNC:6019	rs116141616	A	G	-0.6188	0.0300757	0.01942	1	154416069	4.62e-94	TRUE	0.0118295	423.321
15602_43	35364	IL-6 sRa	Interleukin-6 receptor subunit alpha	IL6R	P08887	ENSG00000160712	3570	HGNC:6019	rs116179745	C	T	-0.4139	0.0369782	0.01221	1	154374201	4.409e-29	TRUE	0.00353041	125.285
15602_43	35364	IL-6 sRa	Interleukin-6 receptor subunit alpha	IL6R	P08887	ENSG00000160712	3570	HGNC:6019	rs116710125	T	C	-0.527	0.0198081	0.04371	1	154502312	5.888e-156	TRUE	0.0196243	707.844
15602_43	35363	IL-6 sRa	Interleukin-6 receptor subunit alpha	IL6R	P08887	ENSG00000160712	3570	HGNC:6019	rs1194586	C	T	0.1268	0.00832955	0.52164	1	154317418	2.492e-52	TRUE	0.00651079	231.737
15602_43	35364	IL-6 sRa	Interleukin-6 receptor subunit alpha	IL6R	P08887	ENSG00000160712	3570	HGNC:6019	rs1194589	G	A	0.235	0.0112355	0.83817	1	154325302	3.841e-97	TRUE	0.0122201	437.473
15602_43	35364	IL-6 sRa	Interleukin-6 receptor subunit alpha	IL6R	P08887	ENSG00000160712	3570	HGNC:6019	rs12030242	C	T	0.128	0.0112144	0.16586	1	153753079	3.563e-30	TRUE	0.00367059	130.278
15602_43	35360	IL-6 sRa	Interleukin-6 receptor subunit alpha	IL6R	P08887	ENSG00000160712	3570	HGNC:6019	rs12043822	A	G	0.4791	0.0263663	0.02586	1	154695000	8.774e-74	TRUE	0.00925185	330.182
15602_43	35362	IL-6 sRa	Interleukin-6 receptor subunit alpha	IL6R	P08887	ENSG00000160712	3570	HGNC:6019	rs12044034	A	G	-0.1223	0.0148417	0.08659	1	153441188	1.718e-16	TRUE	0.00191663	67.9023
15602_43	35363	IL-6 sRa	Interleukin-6 receptor subunit alpha	IL6R	P08887	ENSG00000160712	3570	HGNC:6019	rs12118721	C	T	0.8085	0.021387	0.62331	1	154397416	1e-200	TRUE	0.0388446	1429.1
15602_43	35360	IL-6 sRa	Interleukin-6 receptor subunit alpha	IL6R	P08887	ENSG00000160712	3570	HGNC:6019	rs12120146	A	G	-0.178	0.0326366	0.01675	1	154714807	4.925e-08	TRUE	0.000840576	29.7461
15602_43	35363	IL-6 sRa	Interleukin-6 receptor subunit alpha	IL6R	P08887	ENSG00000160712	3570	HGNC:6019	rs12121180	T	C	0.4319	0.0117038	0.14261	1	154282222	1e-200	TRUE	0.037083	1361.79
15602_43	35365	IL-6 sRa	Interleukin-6 receptor subunit alpha	IL6R	P08887	ENSG00000160712	3570	HGNC:6019	rs12130660	C	T	0.3452	0.0243786	0.03106	1	154088258	1.621e-45	TRUE	0.00563792	200.504
15602_43	35363	IL-6 sRa	Interleukin-6 receptor subunit alpha	IL6R	P08887	ENSG00000160712	3570	HGNC:6019	rs12145000	T	C	0.2783	0.0359437	0.01308	1	154271310	9.736e-15	TRUE	0.00169247	59.9487
15602_43	35363	IL-6 sRa	Interleukin-6 receptor subunit alpha	IL6R	P08887	ENSG00000160712	3570	HGNC:6019	rs1218549	C	A	0.1055	0.00868205	0.65024	1	154803645	5.632e-34	TRUE	0.0041584	147.659
15602_43	35363	IL-6 sRa	Interleukin-6 receptor subunit alpha	IL6R	P08887	ENSG00000160712	3570	HGNC:6019	rs1218576	T	C	-0.1886	0.012268	0.86382	1	154811316	2.471e-53	TRUE	0.00663925	236.34
15602_43	35365	IL-6 sRa	Interleukin-6 receptor subunit alpha	IL6R	P08887	ENSG00000160712	3570	HGNC:6019	rs1218583	G	T	0.1339	0.0179378	0.94284	1	154833978	8.351e-14	TRUE	0.00157322	55.7213
15602_43	35364	IL-6 sRa	Interleukin-6 receptor subunit alpha	IL6R	P08887	ENSG00000160712	3570	HGNC:6019	rs1218592	A	C	0.0747	0.00983716	0.76337	1	154889485	3.11e-14	TRUE	0.00162801	57.6636
15602_43	35363	IL-6 sRa	Interleukin-6 receptor subunit alpha	IL6R	P08887	ENSG00000160712	3570	HGNC:6019	rs12406117	A	G	-0.0846	0.00836466	0.56089	1	154740879	4.79e-24	TRUE	0.00288446	102.293
15602_43	35364	IL-6 sRa	Interleukin-6 receptor subunit alpha	IL6R	P08887	ENSG00000160712	3570	HGNC:6019	rs12735458	G	A	0.3419	0.0355409	0.0137	1	154361406	6.59e-22	TRUE	0.00261017	92.5423
15602_43	35364	IL-6 sRa	Interleukin-6 receptor subunit alpha	IL6R	P08887	ENSG00000160712	3570	HGNC:6019	rs12739228	A	G	-0.646	0.0248443	0.03027	1	154426190	4.702e-149	TRUE	0.0187608	676.104
15602_43	35362	IL-6 sRa	Interleukin-6 receptor subunit alpha	IL6R	P08887	ENSG00000160712	3570	HGNC:6019	rs12755318	A	C	0.3087	0.0247485	0.03052	1	153405317	1.042e-35	TRUE	0.00438082	155.587
15602_43	35359	IL-6 sRa	Interleukin-6 receptor subunit alpha	IL6R	P08887	ENSG00000160712	3570	HGNC:6019	rs141244226	A	G	-0.1846	0.0257293	0.02819	1	154800628	7.246e-13	TRUE	0.00145379	51.4765
15602_43	35360	IL-6 sRa	Interleukin-6 receptor subunit alpha	IL6R	P08887	ENSG00000160712	3570	HGNC:6019	rs141444337	G	C	-0.3781	0.0236362	0.03254	1	154697624	1.348e-57	TRUE	0.00718521	255.893
15602_43	35364	IL-6 sRa	Interleukin-6 receptor subunit alpha	IL6R	P08887	ENSG00000160712	3570	HGNC:6019	rs142712385	A	T	-0.2341	0.0138605	0.09867	1	154431123	5.358e-64	TRUE	0.00800235	285.262
15602_43	35364	IL-6 sRa	Interleukin-6 receptor subunit alpha	IL6R	P08887	ENSG00000160712	3570	HGNC:6019	rs144063783	C	T	0.5271	0.0344665	0.0149	1	154333596	8.499e-53	TRUE	0.0065704	233.879
15602_43	35363	IL-6 sRa	Interleukin-6 receptor subunit alpha	IL6R	P08887	ENSG00000160712	3570	HGNC:6019	rs144230470	C	G	-0.3383	0.0381597	0.01217	1	154752411	7.625e-19	TRUE	0.00221771	78.5948
15602_43	35365	IL-6 sRa	Interleukin-6 receptor subunit alpha	IL6R	P08887	ENSG00000160712	3570	HGNC:6019	rs144929754	T	C	-0.2409	0.0308862	0.01825	1	154116412	6.211e-15	TRUE	0.00171731	60.8336
15602_43	35362	IL-6 sRa	Interleukin-6 receptor subunit alpha	IL6R	P08887	ENSG00000160712	3570	HGNC:6019	rs145347535	T	G	0.3808	0.0395102	0.01138	1	153431140	5.524e-22	TRUE	0.00262014	92.8915
15602_43	35361	IL-6 sRa	Interleukin-6 receptor subunit alpha	IL6R	P08887	ENSG00000160712	3570	HGNC:6019	rs147310317	A	C	0.3171	0.0379899	0.0115	1	153565627	7.005e-17	TRUE	0.00196653	69.6715
15602_43	35364	IL-6 sRa	Interleukin-6 receptor subunit alpha	IL6R	P08887	ENSG00000160712	3570	HGNC:6019	rs147830103	A	G	-0.5347	0.0256337	0.02758	1	154509061	1.256e-96	TRUE	0.0121549	435.109
15602_43	35365	IL-6 sRa	Interleukin-6 receptor subunit alpha	IL6R	P08887	ENSG00000160712	3570	HGNC:6019	rs149432883	A	G	-0.249	0.0134117	0.11037	1	154064138	6.072e-77	TRUE	0.00965312	344.691
15602_43	35363	IL-6 sRa	Interleukin-6 receptor subunit alpha	IL6R	P08887	ENSG00000160712	3570	HGNC:6019	rs149481318	C	T	-0.5298	0.0263792	0.02453	1	154645937	1.018e-89	TRUE	0.0112785	403.368
15602_43	35364	IL-6 sRa	Interleukin-6 receptor subunit alpha	IL6R	P08887	ENSG00000160712	3570	HGNC:6019	rs150715756	A	G	0.1615	0.0295597	0.01981	1	154860092	4.668e-08	TRUE	0.000843414	29.85
15602_43	35363	IL-6 sRa	Interleukin-6 receptor subunit alpha	IL6R	P08887	ENSG00000160712	3570	HGNC:6019	rs151205508	C	T	-0.2314	0.0378148	0.01233	1	153648391	9.399e-10	TRUE	0.00105784	37.4458
15602_43	35362	IL-6 sRa	Interleukin-6 receptor subunit alpha	IL6R	P08887	ENSG00000160712	3570	HGNC:6019	rs17719419	A	C	-0.1576	0.0173756	0.06222	1	154771916	1.188e-19	TRUE	0.0023212	82.2685
15602_43	35364	IL-6 sRa	Interleukin-6 receptor subunit alpha	IL6R	P08887	ENSG00000160712	3570	HGNC:6019	rs183641528	A	G	0.3312	0.0260171	0.02612	1	154499328	4.025e-37	TRUE	0.00456183	162.055
15602_43	35364	IL-6 sRa	Interleukin-6 receptor subunit alpha	IL6R	P08887	ENSG00000160712	3570	HGNC:6019	rs186136565	T	C	0.2412	0.0288343	0.02068	1	154264578	6.01e-17	TRUE	0.00197487	69.9737
15602_43	35364	IL-6 sRa	Interleukin-6 receptor subunit alpha	IL6R	P08887	ENSG00000160712	3570	HGNC:6019	rs187922779	C	T	0.1784	0.0296672	0.01993	1	154926886	1.817e-09	TRUE	0.00102154	36.1607
15602_43	35362	IL-6 sRa	Interleukin-6 receptor subunit alpha	IL6R	P08887	ENSG00000160712	3570	HGNC:6019	rs192159309	A	G	-0.1769	0.0204624	0.04422	1	153492583	5.375e-18	TRUE	0.00210917	74.7381
15602_43	35363	IL-6 sRa	Interleukin-6 receptor subunit alpha	IL6R	P08887	ENSG00000160712	3570	HGNC:6019	rs1984285	G	T	-0.0906	0.0102234	0.21241	1	154796895	7.859e-19	TRUE	0.00221603	78.5351
15602_43	35360	IL-6 sRa	Interleukin-6 receptor subunit alpha	IL6R	P08887	ENSG00000160712	3570	HGNC:6019	rs2071576	T	C	-0.1055	0.0102034	0.78512	1	153538449	4.661e-25	TRUE	0.0030145	106.909
15602_43	35365	IL-6 sRa	Interleukin-6 receptor subunit alpha	IL6R	P08887	ENSG00000160712	3570	HGNC:6019	rs28654266	T	C	-0.3783	0.0316933	0.01728	1	153942593	7.659e-33	TRUE	0.00401274	142.474
15602_43	35362	IL-6 sRa	Interleukin-6 receptor subunit alpha	IL6R	P08887	ENSG00000160712	3570	HGNC:6019	rs28730729	G	C	0.4035	0.0196812	0.04638	1	153659860	2.077e-93	TRUE	0.0117473	420.322
15602_43	35363	IL-6 sRa	Interleukin-6 receptor subunit alpha	IL6R	P08887	ENSG00000160712	3570	HGNC:6019	rs34695094	C	T	-0.2386	0.0220664	0.03801	1	153722182	2.993e-27	TRUE	0.00329549	116.917
15602_43	35365	IL-6 sRa	Interleukin-6 receptor subunit alpha	IL6R	P08887	ENSG00000160712	3570	HGNC:6019	rs35001694	T	C	0.1993	0.0244117	0.02981	1	155257818	3.238e-16	TRUE	0.00188127	66.6528
15602_43	35364	IL-6 sRa	Interleukin-6 receptor subunit alpha	IL6R	P08887	ENSG00000160712	3570	HGNC:6019	rs35612271	A	G	0.0545	0.00913731	0.29932	1	154790480	2.453e-09	TRUE	0.00100504	35.5759
15602_43	35364	IL-6 sRa	Interleukin-6 receptor subunit alpha	IL6R	P08887	ENSG00000160712	3570	HGNC:6019	rs35902694	G	T	0.0921	0.0090537	0.6926	1	155042886	2.627e-24	TRUE	0.00291784	103.483
15602_43	35363	IL-6 sRa	Interleukin-6 receptor subunit alpha	IL6R	P08887	ENSG00000160712	3570	HGNC:6019	rs3766926	C	T	-0.3725	0.00985362	0.22088	1	154564417	1e-200	TRUE	0.0388446	1429.1
15602_43	35363	IL-6 sRa	Interleukin-6 receptor subunit alpha	IL6R	P08887	ENSG00000160712	3570	HGNC:6019	rs41264229	C	T	0.1861	0.0287484	0.02006	1	155306440	9.582e-11	TRUE	0.00118366	41.9049
15602_43	35364	IL-6 sRa	Interleukin-6 receptor subunit alpha	IL6R	P08887	ENSG00000160712	3570	HGNC:6019	rs41264253	A	G	-0.1579	0.0126781	0.12207	1	154918352	1.321e-35	TRUE	0.00436735	155.116
15602_43	35361	IL-6 sRa	Interleukin-6 receptor subunit alpha	IL6R	P08887	ENSG00000160712	3570	HGNC:6019	rs41265183	T	C	-0.2714	0.0142833	0.09451	1	153602553	1.667e-80	TRUE	0.0101076	361.045
15602_43	35363	IL-6 sRa	Interleukin-6 receptor subunit alpha	IL6R	P08887	ENSG00000160712	3570	HGNC:6019	rs41265215	G	A	-0.3191	0.0241987	0.0292	1	154164063	1.047e-39	TRUE	0.00489346	173.888
15602_43	35364	IL-6 sRa	Interleukin-6 receptor subunit alpha	IL6R	P08887	ENSG00000160712	3570	HGNC:6019	rs41269913	T	C	0.6492	0.0228061	0.03495	1	154461480	3.086e-178	TRUE	0.0224015	810.315
15602_43	35363	IL-6 sRa	Interleukin-6 receptor subunit alpha	IL6R	P08887	ENSG00000160712	3570	HGNC:6019	rs4845406	G	A	0.1052	0.00838454	0.53904	1	155008610	4.134e-36	TRUE	0.0044322	157.425
15602_43	35364	IL-6 sRa	Interleukin-6 receptor subunit alpha	IL6R	P08887	ENSG00000160712	3570	HGNC:6019	rs4845698	A	G	0.1481	0.0232882	0.03359	1	154968316	2.025e-10	TRUE	0.00114236	40.4424
15602_43	35361	IL-6 sRa	Interleukin-6 receptor subunit alpha	IL6R	P08887	ENSG00000160712	3570	HGNC:6019	rs57034503	T	C	-0.2315	0.0247589	0.02944	1	153551050	8.749e-21	TRUE	0.00246643	87.4261
15602_43	35362	IL-6 sRa	Interleukin-6 receptor subunit alpha	IL6R	P08887	ENSG00000160712	3570	HGNC:6019	rs57438059	C	T	0.1542	0.0223848	0.03632	1	154782626	5.634e-12	TRUE	0.0013402	47.453
15602_43	35364	IL-6 sRa	Interleukin-6 receptor subunit alpha	IL6R	P08887	ENSG00000160712	3570	HGNC:6019	rs57569414	A	C	0.5269	0.0140322	0.09706	1	154380419	1e-200	TRUE	0.0383431	1409.95
15602_43	35363	IL-6 sRa	Interleukin-6 receptor subunit alpha	IL6R	P08887	ENSG00000160712	3570	HGNC:6019	rs6660569	T	C	-0.1489	0.0184378	0.05225	1	154759860	6.703e-16	TRUE	0.00184097	65.2187
15602_43	35360	IL-6 sRa	Interleukin-6 receptor subunit alpha	IL6R	P08887	ENSG00000160712	3570	HGNC:6019	rs6682000	A	C	-0.0699	0.0083741	0.47717	1	154711226	6.992e-17	TRUE	0.00196669	69.6752
15602_43	35364	IL-6 sRa	Interleukin-6 receptor subunit alpha	IL6R	P08887	ENSG00000160712	3570	HGNC:6019	rs6693773	T	C	-0.279	0.0204997	0.04209	1	153772100	3.493e-42	TRUE	0.00521086	185.232
15602_43	35363	IL-6 sRa	Interleukin-6 receptor subunit alpha	IL6R	P08887	ENSG00000160712	3570	HGNC:6019	rs6719	C	T	-0.0685	0.00842629	0.42793	1	154179679	4.317e-16	TRUE	0.00186541	66.0859
15602_43	35365	IL-6 sRa	Interleukin-6 receptor subunit alpha	IL6R	P08887	ENSG00000160712	3570	HGNC:6019	rs71628645	G	A	-0.244	0.0406274	0.01044	1	155111307	1.904e-09	TRUE	0.00101894	36.0695
15602_43	35360	IL-6 sRa	Interleukin-6 receptor subunit alpha	IL6R	P08887	ENSG00000160712	3570	HGNC:6019	rs72700220	A	C	-0.1142	0.0170864	0.06436	1	154694172	2.33e-11	TRUE	0.00126182	44.6717
15602_43	35359	IL-6 sRa	Interleukin-6 receptor subunit alpha	IL6R	P08887	ENSG00000160712	3570	HGNC:6019	rs72999485	C	G	-0.4649	0.0176051	0.05807	1	154559360	1.133e-153	TRUE	0.0193413	697.34
15602_43	35364	IL-6 sRa	Interleukin-6 receptor subunit alpha	IL6R	P08887	ENSG00000160712	3570	HGNC:6019	rs73016210	A	G	-0.5036	0.031184	0.01852	1	154440062	1.148e-58	TRUE	0.00732118	260.801
15602_43	35365	IL-6 sRa	Interleukin-6 receptor subunit alpha	IL6R	P08887	ENSG00000160712	3570	HGNC:6019	rs74447439	C	G	-0.314	0.033612	0.01551	1	153989138	9.462e-21	TRUE	0.00246179	87.2711
15602_43	35363	IL-6 sRa	Interleukin-6 receptor subunit alpha	IL6R	P08887	ENSG00000160712	3570	HGNC:6019	rs74859699	A	G	0.4122	0.0216405	0.039	1	154739875	6.873e-81	TRUE	0.010156	362.813
15602_43	35363	IL-6 sRa	Interleukin-6 receptor subunit alpha	IL6R	P08887	ENSG00000160712	3570	HGNC:6019	rs75608941	G	T	0.4661	0.0277089	0.02404	1	153729662	1.703e-63	TRUE	0.00793843	282.957
15602_43	35364	IL-6 sRa	Interleukin-6 receptor subunit alpha	IL6R	P08887	ENSG00000160712	3570	HGNC:6019	rs76289529	T	C	0.6762	0.0196846	0.04731	1	154516404	1e-200	TRUE	0.0322927	1180.04
15602_43	35361	IL-6 sRa	Interleukin-6 receptor subunit alpha	IL6R	P08887	ENSG00000160712	3570	HGNC:6019	rs76459982	G	A	-0.515	0.0295105	0.019	1	153567363	3.357e-68	TRUE	0.0085396	304.553
15602_43	35365	IL-6 sRa	Interleukin-6 receptor subunit alpha	IL6R	P08887	ENSG00000160712	3570	HGNC:6019	rs76529808	T	C	-0.2189	0.0383516	0.01161	1	153923461	1.145e-08	TRUE	0.000920399	32.5781
15602_43	35361	IL-6 sRa	Interleukin-6 receptor subunit alpha	IL6R	P08887	ENSG00000160712	3570	HGNC:6019	rs76683466	T	C	0.3124	0.0161999	0.07309	1	154720134	7.317e-83	TRUE	0.0104076	371.873
15602_43	35365	IL-6 sRa	Interleukin-6 receptor subunit alpha	IL6R	P08887	ENSG00000160712	3570	HGNC:6019	rs76798800	T	G	0.0784	0.00910331	0.30689	1	154994978	7.164e-18	TRUE	0.00209302	74.1709
15602_43	35364	IL-6 sRa	Interleukin-6 receptor subunit alpha	IL6R	P08887	ENSG00000160712	3570	HGNC:6019	rs77243303	T	C	-0.3518	0.0369078	0.01252	1	154856891	1.545e-21	TRUE	0.00256273	90.8562
15602_43	35365	IL-6 sRa	Interleukin-6 receptor subunit alpha	IL6R	P08887	ENSG00000160712	3570	HGNC:6019	rs77448944	T	C	0.2186	0.0276496	0.02393	1	154014258	2.656e-15	TRUE	0.00176444	62.5063
15602_43	35360	IL-6 sRa	Interleukin-6 receptor subunit alpha	IL6R	P08887	ENSG00000160712	3570	HGNC:6019	rs77510509	C	T	0.2706	0.0151149	0.08256	1	154693004	1.12e-71	TRUE	0.00898335	320.513
15602_43	35361	IL-6 sRa	Interleukin-6 receptor subunit alpha	IL6R	P08887	ENSG00000160712	3570	HGNC:6019	rs77515073	A	G	0.3954	0.0249701	0.02878	1	153598116	1.786e-56	TRUE	0.00704149	250.746
15602_43	35362	IL-6 sRa	Interleukin-6 receptor subunit alpha	IL6R	P08887	ENSG00000160712	3570	HGNC:6019	rs77667186	T	C	0.1559	0.0205297	0.04482	1	153419760	3.105e-14	TRUE	0.00162819	57.6668
15602_43	35363	IL-6 sRa	Interleukin-6 receptor subunit alpha	IL6R	P08887	ENSG00000160712	3570	HGNC:6019	rs77801962	C	T	0.5311	0.0221	0.03638	1	154566932	1.297e-127	TRUE	0.0160697	577.523
15602_43	35364	IL-6 sRa	Interleukin-6 receptor subunit alpha	IL6R	P08887	ENSG00000160712	3570	HGNC:6019	rs78431420	T	G	0.291	0.025591	0.02839	1	154929408	5.818e-30	TRUE	0.00364327	129.304
15602_43	35365	IL-6 sRa	Interleukin-6 receptor subunit alpha	IL6R	P08887	ENSG00000160712	3570	HGNC:6019	rs78516530	G	C	0.1668	0.0230301	0.03282	1	155154972	4.399e-13	TRUE	0.00148117	52.4564
15602_43	35365	IL-6 sRa	Interleukin-6 receptor subunit alpha	IL6R	P08887	ENSG00000160712	3570	HGNC:6019	rs78571619	G	A	0.2504	0.0229374	0.0344	1	153816780	9.595e-28	TRUE	0.00335869	119.174
15602_43	35362	IL-6 sRa	Interleukin-6 receptor subunit alpha	IL6R	P08887	ENSG00000160712	3570	HGNC:6019	rs78939464	T	C	-0.1505	0.0254811	0.02745	1	153412634	3.498e-09	TRUE	0.000985589	34.8848
15602_43	35364	IL-6 sRa	Interleukin-6 receptor subunit alpha	IL6R	P08887	ENSG00000160712	3570	HGNC:6019	rs79219014	T	G	0.6306	0.0324711	0.01663	1	154415675	5.193e-84	TRUE	0.0105529	377.15
15602_43	35363	IL-6 sRa	Interleukin-6 receptor subunit alpha	IL6R	P08887	ENSG00000160712	3570	HGNC:6019	rs79438264	T	C	0.521	0.0265602	0.02514	1	154611891	1.133e-85	TRUE	0.0107644	384.78
15602_43	35365	IL-6 sRa	Interleukin-6 receptor subunit alpha	IL6R	P08887	ENSG00000160712	3570	HGNC:6019	rs79752373	A	G	-0.2899	0.0258656	0.02647	1	155102709	3.727e-29	TRUE	0.00353968	125.618
15602_43	35363	IL-6 sRa	Interleukin-6 receptor subunit alpha	IL6R	P08887	ENSG00000160712	3570	HGNC:6019	rs79753070	A	G	0.7027	0.0304333	0.01849	1	154652279	5.855e-118	TRUE	0.0148532	533.141
15602_43	35364	IL-6 sRa	Interleukin-6 receptor subunit alpha	IL6R	P08887	ENSG00000160712	3570	HGNC:6019	rs79778789	G	A	0.672	0.0264708	0.02671	1	154409434	3.56e-142	TRUE	0.0178988	644.472
15602_43	35364	IL-6 sRa	Interleukin-6 receptor subunit alpha	IL6R	P08887	ENSG00000160712	3570	HGNC:6019	rs79810698	A	C	0.1435	0.0211848	0.04031	1	154836444	1.255e-11	TRUE	0.00129585	45.8835
15602_43	35365	IL-6 sRa	Interleukin-6 receptor subunit alpha	IL6R	P08887	ENSG00000160712	3570	HGNC:6019	rs80204403	G	C	0.1422	0.0224186	0.03736	1	155093567	2.254e-10	TRUE	0.00113642	40.2331
15602_43	35363	IL-6 sRa	Interleukin-6 receptor subunit alpha	IL6R	P08887	ENSG00000160712	3570	HGNC:6019	rs8192484	T	A	-0.2492	0.0238975	0.03037	1	154541839	1.85e-25	TRUE	0.00306572	108.74
15602_43	35365	IL-6 sRa	Interleukin-6 receptor subunit alpha	IL6R	P08887	ENSG00000160712	3570	HGNC:6019	rs878436	C	T	0.1609	0.0216209	0.03837	1	155224985	9.928e-14	TRUE	0.00156363	55.3812
15602_43	35363	IL-6 sRa	Interleukin-6 receptor subunit alpha	IL6R	P08887	ENSG00000160712	3570	HGNC:6019	rs883319	T	C	-0.1095	0.00991857	0.22529	1	154758422	2.453e-28	TRUE	0.00343488	121.879
15602_43	35363	IL-6 sRa	Interleukin-6 receptor subunit alpha	IL6R	P08887	ENSG00000160712	3570	HGNC:6019	rs9660002	T	C	-0.1697	0.00837692	0.44525	1	153674211	3.017e-91	TRUE	0.0114725	410.388
15602_43	35359	IL-6 sRa	Interleukin-6 receptor subunit alpha	IL6R	P08887	ENSG00000160712	3570	HGNC:6019	rs9919337	T	C	-0.1237	0.00958601	0.25979	1	154687641	4.261e-38	TRUE	0.00468757	166.519
15602_43	35363	IL-6 sRa	Interleukin-6 receptor subunit alpha	IL6R	P08887	ENSG00000160712	3570	HGNC:6019	rs9970364	C	T	0.1836	0.0182888	0.05636	1	154794318	1.028e-23	TRUE	0.00284193	100.78
6247_9	35374	SIRB1	Signal-regulatory protein beta-1	SIRPB1	O00241	ENSG00000101307	10326	HGNC:15928	rs11087269	C	T	0.1989	0.0132758	0.13063	20	1944510	9.612e-51	TRUE	0.00630578	224.464
6247_9	35375	SIRB1	Signal-regulatory protein beta-1	SIRPB1	O00241	ENSG00000101307	10326	HGNC:15928	rs111350250	T	C	-0.1611	0.0170781	0.0736	20	2031552	3.98e-21	TRUE	0.00250928	88.9841
6247_9	35367	SIRB1	Signal-regulatory protein beta-1	SIRPB1	O00241	ENSG00000101307	10326	HGNC:15928	rs112299692	G	C	-0.2762	0.0307484	0.02082	20	1013197	2.645e-19	TRUE	0.00227635	80.6867
6247_9	35374	SIRB1	Signal-regulatory protein beta-1	SIRPB1	O00241	ENSG00000101307	10326	HGNC:15928	rs113178824	T	C	0.3401	0.0400109	0.01278	20	1935015	1.893e-17	TRUE	0.0020385	72.253
6247_9	35361	SIRB1	Signal-regulatory protein beta-1	SIRPB1	O00241	ENSG00000101307	10326	HGNC:15928	rs113709328	G	A	0.1396	0.0254453	0.0328	20	710228	4.105e-08	TRUE	0.000850522	30.0992
6247_9	35373	SIRB1	Signal-regulatory protein beta-1	SIRPB1	O00241	ENSG00000101307	10326	HGNC:15928	rs114919894	G	A	0.407	0.0206629	0.04835	20	1401329	2.281e-86	TRUE	0.0108498	387.978
6247_9	35364	SIRB1	Signal-regulatory protein beta-1	SIRPB1	O00241	ENSG00000101307	10326	HGNC:15928	rs1154757	T	C	0.1979	0.0146405	0.10592	20	978720	1.237e-41	TRUE	0.00514046	182.716
6247_9	35362	SIRB1	Signal-regulatory protein beta-1	SIRPB1	O00241	ENSG00000101307	10326	HGNC:15928	rs11696228	T	C	-0.21	0.0239836	0.03636	20	723609	2.023e-18	TRUE	0.00216351	76.6676
6247_9	35375	SIRB1	Signal-regulatory protein beta-1	SIRPB1	O00241	ENSG00000101307	10326	HGNC:15928	rs116966566	C	T	0.1812	0.0244002	0.03517	20	2327829	1.118e-13	TRUE	0.00155661	55.1478
6247_9	35373	SIRB1	Signal-regulatory protein beta-1	SIRPB1	O00241	ENSG00000101307	10326	HGNC:15928	rs11697263	G	A	0.2081	0.0109435	0.21314	20	1328256	1.261e-80	TRUE	0.0101197	361.602
6247_9	35373	SIRB1	Signal-regulatory protein beta-1	SIRPB1	O00241	ENSG00000101307	10326	HGNC:15928	rs11697413	A	G	0.2302	0.0199041	0.05518	20	1265152	6.166e-31	TRUE	0.00376738	133.76
6247_9	35374	SIRB1	Signal-regulatory protein beta-1	SIRPB1	O00241	ENSG00000101307	10326	HGNC:15928	rs11699578	T	C	-0.7493	0.0295506	0.02313	20	1617592	7.624e-142	TRUE	0.0178523	642.951
6247_9	35365	SIRB1	Signal-regulatory protein beta-1	SIRPB1	O00241	ENSG00000101307	10326	HGNC:15928	rs117061910	C	T	0.2823	0.0387223	0.01351	20	903834	3.091e-13	TRUE	0.00150071	53.1495
6247_9	35373	SIRB1	Signal-regulatory protein beta-1	SIRPB1	O00241	ENSG00000101307	10326	HGNC:15928	rs117071621	G	T	0.3072	0.0365218	0.01635	20	1415473	4.051e-17	TRUE	0.00199629	70.7519
6247_9	35375	SIRB1	Signal-regulatory protein beta-1	SIRPB1	O00241	ENSG00000101307	10326	HGNC:15928	rs117149764	C	T	-0.3423	0.03354	0.01745	20	2025089	1.869e-24	TRUE	0.00293589	104.157
6247_9	35372	SIRB1	Signal-regulatory protein beta-1	SIRPB1	O00241	ENSG00000101307	10326	HGNC:15928	rs117226861	A	T	0.1772	0.0307164	0.02191	20	2305263	7.979e-09	TRUE	0.000940032	33.2802
6247_9	35360	SIRB1	Signal-regulatory protein beta-1	SIRPB1	O00241	ENSG00000101307	10326	HGNC:15928	rs117235581	G	A	0.1292	0.022413	0.0412	20	893411	8.19e-09	TRUE	0.000938918	33.2295
6247_9	35374	SIRB1	Signal-regulatory protein beta-1	SIRPB1	O00241	ENSG00000101307	10326	HGNC:15928	rs117284274	T	G	-0.8836	0.0233736	0.04172	20	1596870	1e-200	TRUE	0.038833	1429.1
6247_9	35371	SIRB1	Signal-regulatory protein beta-1	SIRPB1	O00241	ENSG00000101307	10326	HGNC:15928	rs117306741	T	C	-0.6133	0.0241508	0.03529	20	1849606	2.896e-142	TRUE	0.0179065	644.884
6247_9	35373	SIRB1	Signal-regulatory protein beta-1	SIRPB1	O00241	ENSG00000101307	10326	HGNC:15928	rs117557888	G	A	0.3349	0.0193573	0.05488	20	1206860	4.628e-67	TRUE	0.00839136	299.322
6247_9	35378	SIRB1	Signal-regulatory protein beta-1	SIRPB1	O00241	ENSG00000101307	10326	HGNC:15928	rs117654917	A	G	0.3108	0.0416418	0.0118	20	2106677	8.415e-14	TRUE	0.00157221	55.7063
6247_9	35358	SIRB1	Signal-regulatory protein beta-1	SIRPB1	O00241	ENSG00000101307	10326	HGNC:15928	rs117765732	A	G	0.1007	0.0153167	0.09548	20	644093	4.881e-11	TRUE	0.00122105	43.2243
6247_9	35371	SIRB1	Signal-regulatory protein beta-1	SIRPB1	O00241	ENSG00000101307	10326	HGNC:15928	rs117766911	A	G	-0.2955	0.0161195	0.08244	20	1780585	4.608e-75	TRUE	0.00941204	336.057
6247_9	35362	SIRB1	Signal-regulatory protein beta-1	SIRPB1	O00241	ENSG00000101307	10326	HGNC:15928	rs117794389	T	C	0.461	0.0297512	0.02398	20	896070	3.74e-54	TRUE	0.00674437	240.1
6247_9	35373	SIRB1	Signal-regulatory protein beta-1	SIRPB1	O00241	ENSG00000101307	10326	HGNC:15928	rs117797937	T	C	-0.1317	0.0216215	0.04448	20	1261888	1.121e-09	TRUE	0.00104784	37.1022
6247_9	35374	SIRB1	Signal-regulatory protein beta-1	SIRPB1	O00241	ENSG00000101307	10326	HGNC:15928	rs117888338	T	C	0.4874	0.0307856	0.0217	20	2280265	1.87e-56	TRUE	0.00703637	250.654
6247_9	35373	SIRB1	Signal-regulatory protein beta-1	SIRPB1	O00241	ENSG00000101307	10326	HGNC:15928	rs117960863	C	T	0.368	0.0398013	0.01369	20	1361277	2.332e-20	TRUE	0.00241105	85.4873
6247_9	35371	SIRB1	Signal-regulatory protein beta-1	SIRPB1	O00241	ENSG00000101307	10326	HGNC:15928	rs117970032	T	G	0.5568	0.0417297	0.01184	20	1859293	1.301e-40	TRUE	0.00500846	178.036
6247_9	35373	SIRB1	Signal-regulatory protein beta-1	SIRPB1	O00241	ENSG00000101307	10326	HGNC:15928	rs118060126	T	C	-0.6005	0.0311705	0.0205	20	1322512	1.056e-82	TRUE	0.0103839	371.141
6247_9	35373	SIRB1	Signal-regulatory protein beta-1	SIRPB1	O00241	ENSG00000101307	10326	HGNC:15928	rs118138527	A	G	0.4453	0.0361818	0.01534	20	1470380	8.276e-35	TRUE	0.00426404	151.469
6247_9	35362	SIRB1	Signal-regulatory protein beta-1	SIRPB1	O00241	ENSG00000101307	10326	HGNC:15928	rs11905326	T	C	-0.0842	0.00911875	0.40429	20	736861	2.614e-20	TRUE	0.00240544	85.2615
6247_9	35373	SIRB1	Signal-regulatory protein beta-1	SIRPB1	O00241	ENSG00000101307	10326	HGNC:15928	rs12479658	A	G	-0.1831	0.0274503	0.02656	20	1765725	2.554e-11	TRUE	0.00125629	44.492
6247_9	35372	SIRB1	Signal-regulatory protein beta-1	SIRPB1	O00241	ENSG00000101307	10326	HGNC:15928	rs12624916	A	G	-0.2526	0.0148072	0.1025	20	1295639	2.98e-65	TRUE	0.00816074	291.02
6247_9	35362	SIRB1	Signal-regulatory protein beta-1	SIRPB1	O00241	ENSG00000101307	10326	HGNC:15928	rs12625348	C	A	-0.0975	0.010963	0.21154	20	866350	5.92e-19	TRUE	0.00223185	79.0948
6247_9	35380	SIRB1	Signal-regulatory protein beta-1	SIRPB1	O00241	ENSG00000101307	10326	HGNC:15928	rs13040427	T	C	-0.1662	0.0271165	0.02713	20	2422242	8.837e-10	TRUE	0.00106072	37.566
6247_9	35372	SIRB1	Signal-regulatory protein beta-1	SIRPB1	O00241	ENSG00000101307	10326	HGNC:15928	rs13042734	G	A	0.758	0.0343803	0.01755	20	1167320	1.009e-107	TRUE	0.0135568	486.093
6247_9	35373	SIRB1	Signal-regulatory protein beta-1	SIRPB1	O00241	ENSG00000101307	10326	HGNC:15928	rs13044015	T	C	0.201	0.0200336	0.05109	20	1428497	1.09e-23	TRUE	0.00283786	100.664
6247_9	35377	SIRB1	Signal-regulatory protein beta-1	SIRPB1	O00241	ENSG00000101307	10326	HGNC:15928	rs137944287	A	G	-0.1953	0.0228597	0.04006	20	2054563	1.303e-17	TRUE	0.00205908	72.9901
6247_9	35373	SIRB1	Signal-regulatory protein beta-1	SIRPB1	O00241	ENSG00000101307	10326	HGNC:15928	rs138745513	G	C	-0.4532	0.0325369	0.01969	20	1231795	4.234e-44	TRUE	0.00545512	194.012
6247_9	35361	SIRB1	Signal-regulatory protein beta-1	SIRPB1	O00241	ENSG00000101307	10326	HGNC:15928	rs138852332	A	G	-0.221	0.0369805	0.0158	20	661032	2.285e-09	TRUE	0.00100902	35.7141
6247_9	35363	SIRB1	Signal-regulatory protein beta-1	SIRPB1	O00241	ENSG00000101307	10326	HGNC:15928	rs139486822	A	G	0.2449	0.0448429	0.0102	20	746410	4.727e-08	TRUE	0.00084275	29.8256
6247_9	35373	SIRB1	Signal-regulatory protein beta-1	SIRPB1	O00241	ENSG00000101307	10326	HGNC:15928	rs139837552	A	G	0.4	0.0424373	0.01018	20	1298673	4.274e-21	TRUE	0.00250546	88.8431
6247_9	35375	SIRB1	Signal-regulatory protein beta-1	SIRPB1	O00241	ENSG00000101307	10326	HGNC:15928	rs142379020	C	T	-0.366	0.0383847	0.01353	20	1950729	1.498e-21	TRUE	0.00256366	90.9174
6247_9	35373	SIRB1	Signal-regulatory protein beta-1	SIRPB1	O00241	ENSG00000101307	10326	HGNC:15928	rs142912690	G	A	-0.4698	0.0252028	0.03123	20	1198495	1.501e-77	TRUE	0.00972824	347.478
6247_9	35373	SIRB1	Signal-regulatory protein beta-1	SIRPB1	O00241	ENSG00000101307	10326	HGNC:15928	rs143201371	C	T	0.4231	0.0402557	0.01296	20	1461356	7.744e-26	TRUE	0.00311336	110.467
6247_9	35373	SIRB1	Signal-regulatory protein beta-1	SIRPB1	O00241	ENSG00000101307	10326	HGNC:15928	rs143651836	T	G	-0.333	0.0204322	0.04978	20	1763994	1.023e-59	TRUE	0.00745353	265.618
6247_9	35373	SIRB1	Signal-regulatory protein beta-1	SIRPB1	O00241	ENSG00000101307	10326	HGNC:15928	rs143874821	A	G	-0.2482	0.0332353	0.01784	20	1280680	8.145e-14	TRUE	0.00157424	55.7704
6247_9	35382	SIRB1	Signal-regulatory protein beta-1	SIRPB1	O00241	ENSG00000101307	10326	HGNC:15928	rs144337455	A	G	0.1879	0.0251039	0.03261	20	2512284	7.16e-14	TRUE	0.00158098	56.0238
6247_9	35373	SIRB1	Signal-regulatory protein beta-1	SIRPB1	O00241	ENSG00000101307	10326	HGNC:15928	rs144636283	A	G	0.2868	0.0235268	0.03798	20	1219613	3.499e-34	TRUE	0.00418374	148.605
6247_9	35359	SIRB1	Signal-regulatory protein beta-1	SIRPB1	O00241	ENSG00000101307	10326	HGNC:15928	rs145053338	T	C	-0.2059	0.0319557	0.02042	20	669531	1.169e-10	TRUE	0.00117282	41.5162
6247_9	35375	SIRB1	Signal-regulatory protein beta-1	SIRPB1	O00241	ENSG00000101307	10326	HGNC:15928	rs145220565	T	C	-0.2671	0.0410631	0.01232	20	2033231	7.789e-11	TRUE	0.00119468	42.3101
6247_9	35363	SIRB1	Signal-regulatory protein beta-1	SIRPB1	O00241	ENSG00000101307	10326	HGNC:15928	rs145480607	A	T	-0.1921	0.0324472	0.01941	20	879823	3.212e-09	TRUE	0.000990249	35.0509
6247_9	35369	SIRB1	Signal-regulatory protein beta-1	SIRPB1	O00241	ENSG00000101307	10326	HGNC:15928	rs145681337	G	A	-0.243	0.0289234	0.02412	20	1900682	4.408e-17	TRUE	0.00199182	70.5853
6247_9	35379	SIRB1	Signal-regulatory protein beta-1	SIRPB1	O00241	ENSG00000101307	10326	HGNC:15928	rs145903487	G	A	0.2014	0.0349993	0.01659	20	2438367	8.695e-09	TRUE	0.000935132	33.1131
6247_9	35374	SIRB1	Signal-regulatory protein beta-1	SIRPB1	O00241	ENSG00000101307	10326	HGNC:15928	rs147124708	A	G	0.1983	0.0324422	0.02191	20	1947843	9.814e-10	TRUE	0.00105513	37.3615
6247_9	35378	SIRB1	Signal-regulatory protein beta-1	SIRPB1	O00241	ENSG00000101307	10326	HGNC:15928	rs147431504	G	C	0.2332	0.0361897	0.01443	20	2470273	1.165e-10	TRUE	0.00117238	41.5229
6247_9	35363	SIRB1	Signal-regulatory protein beta-1	SIRPB1	O00241	ENSG00000101307	10326	HGNC:15928	rs147607484	A	G	0.1517	0.0230819	0.03995	20	879731	4.956e-11	TRUE	0.00122004	43.1945
6247_9	35364	SIRB1	Signal-regulatory protein beta-1	SIRPB1	O00241	ENSG00000101307	10326	HGNC:15928	rs148021305	A	G	0.4741	0.028321	0.02672	20	900671	6.675e-63	TRUE	0.00786243	280.235
6247_9	35369	SIRB1	Signal-regulatory protein beta-1	SIRPB1	O00241	ENSG00000101307	10326	HGNC:15928	rs148541653	A	G	-0.1744	0.0233721	0.03784	20	1817507	8.529e-14	TRUE	0.00157187	55.6798
6247_9	35361	SIRB1	Signal-regulatory protein beta-1	SIRPB1	O00241	ENSG00000101307	10326	HGNC:15928	rs148560767	A	C	-0.1292	0.0172728	0.07336	20	768037	7.435e-14	TRUE	0.00157983	55.9497
6247_9	35374	SIRB1	Signal-regulatory protein beta-1	SIRPB1	O00241	ENSG00000101307	10326	HGNC:15928	rs148617538	A	G	-0.7724	0.0260047	0.03135	20	1686134	7.168e-194	TRUE	0.0243345	882.227
6247_9	35382	SIRB1	Signal-regulatory protein beta-1	SIRPB1	O00241	ENSG00000101307	10326	HGNC:15928	rs148710225	A	G	0.2707	0.0318286	0.02029	20	2511198	1.817e-17	TRUE	0.00204031	72.3339
6247_9	35374	SIRB1	Signal-regulatory protein beta-1	SIRPB1	O00241	ENSG00000101307	10326	HGNC:15928	rs148723311	C	T	0.5793	0.0424321	0.01192	20	1706822	1.953e-42	TRUE	0.00524176	186.388
6247_9	35373	SIRB1	Signal-regulatory protein beta-1	SIRPB1	O00241	ENSG00000101307	10326	HGNC:15928	rs149062671	A	G	-0.239	0.028664	0.02395	20	1185813	7.556e-17	TRUE	0.00196166	69.5222
6247_9	35362	SIRB1	Signal-regulatory protein beta-1	SIRPB1	O00241	ENSG00000101307	10326	HGNC:15928	rs149415621	A	G	-0.2368	0.0367848	0.01455	20	738150	1.215e-10	TRUE	0.00117059	41.4407
6247_9	35363	SIRB1	Signal-regulatory protein beta-1	SIRPB1	O00241	ENSG00000101307	10326	HGNC:15928	rs150461183	A	G	0.151	0.026154	0.02943	20	832625	7.764e-09	TRUE	0.000941771	33.3333
6247_9	35373	SIRB1	Signal-regulatory protein beta-1	SIRPB1	O00241	ENSG00000101307	10326	HGNC:15928	rs17717581	G	A	0.2283	0.016075	0.08197	20	1256598	8.876e-46	TRUE	0.00567016	201.703
6247_9	35371	SIRB1	Signal-regulatory protein beta-1	SIRPB1	O00241	ENSG00000101307	10326	HGNC:15928	rs17774176	G	C	-0.3302	0.0167173	0.07885	20	1792416	7.713e-87	TRUE	0.0109102	390.141
6247_9	35369	SIRB1	Signal-regulatory protein beta-1	SIRPB1	O00241	ENSG00000101307	10326	HGNC:15928	rs17776032	T	C	-0.3309	0.0395127	0.01371	20	1898452	5.545e-17	TRUE	0.00197907	70.1326
6247_9	35373	SIRB1	Signal-regulatory protein beta-1	SIRPB1	O00241	ENSG00000101307	10326	HGNC:15928	rs17791824	T	C	0.8653	0.0250772	0.03152	20	1357446	1e-200	TRUE	0.0325649	1190.63
6247_9	35373	SIRB1	Signal-regulatory protein beta-1	SIRPB1	O00241	ENSG00000101307	10326	HGNC:15928	rs1803414	A	T	0.4601	0.0270195	0.02905	20	1147749	5.054e-65	TRUE	0.00813123	289.968
6247_9	35372	SIRB1	Signal-regulatory protein beta-1	SIRPB1	O00241	ENSG00000101307	10326	HGNC:15928	rs184020268	C	T	0.3513	0.0336685	0.01852	20	1162901	1.733e-25	TRUE	0.00306858	108.87
6247_9	35375	SIRB1	Signal-regulatory protein beta-1	SIRPB1	O00241	ENSG00000101307	10326	HGNC:15928	rs184759906	G	A	0.194	0.0266201	0.02836	20	1958764	3.152e-13	TRUE	0.00149921	53.1111
6247_9	35377	SIRB1	Signal-regulatory protein beta-1	SIRPB1	O00241	ENSG00000101307	10326	HGNC:15928	rs185178435	A	G	-0.4098	0.0412776	0.01189	20	2147790	3.148e-23	TRUE	0.0027785	98.5633
6247_9	35377	SIRB1	Signal-regulatory protein beta-1	SIRPB1	O00241	ENSG00000101307	10326	HGNC:15928	rs187538842	A	G	-0.3309	0.0311424	0.02163	20	2149273	2.271e-26	TRUE	0.00318133	112.899
6247_9	35363	SIRB1	Signal-regulatory protein beta-1	SIRPB1	O00241	ENSG00000101307	10326	HGNC:15928	rs188219984	C	T	-0.3104	0.0368953	0.01523	20	829839	3.997e-17	TRUE	0.0019976	70.7783
6247_9	35377	SIRB1	Signal-regulatory protein beta-1	SIRPB1	O00241	ENSG00000101307	10326	HGNC:15928	rs188492890	T	C	0.2548	0.0218459	0.04373	20	2191069	1.958e-31	TRUE	0.00383085	136.037
6247_9	35360	SIRB1	Signal-regulatory protein beta-1	SIRPB1	O00241	ENSG00000101307	10326	HGNC:15928	rs1998114	C	T	0.2196	0.0311695	0.02174	20	703390	1.85e-12	TRUE	0.00140187	49.6369
6247_9	35367	SIRB1	Signal-regulatory protein beta-1	SIRPB1	O00241	ENSG00000101307	10326	HGNC:15928	rs200889	A	G	0.0828	0.00921031	0.39703	20	1794342	2.474e-19	TRUE	0.00228006	80.8187
6247_9	35374	SIRB1	Signal-regulatory protein beta-1	SIRPB1	O00241	ENSG00000101307	10326	HGNC:15928	rs202476	G	A	-0.1636	0.00919761	0.61866	20	1683358	8.877e-71	TRUE	0.00886522	316.385
6247_9	35373	SIRB1	Signal-regulatory protein beta-1	SIRPB1	O00241	ENSG00000101307	10326	HGNC:15928	rs202488	C	T	0.1339	0.0101177	0.73295	20	1753882	5.566e-40	TRUE	0.00492726	175.145
6247_9	35364	SIRB1	Signal-regulatory protein beta-1	SIRPB1	O00241	ENSG00000101307	10326	HGNC:15928	rs2024896	A	G	-0.1075	0.0196299	0.94515	20	746952	4.342e-08	TRUE	0.000847377	29.9904
6247_9	35375	SIRB1	Signal-regulatory protein beta-1	SIRPB1	O00241	ENSG00000101307	10326	HGNC:15928	rs202522	G	A	-0.3758	0.0201729	0.05077	20	1674490	1.873e-77	TRUE	0.00971545	347.036
6247_9	35355	SIRB1	Signal-regulatory protein beta-1	SIRPB1	O00241	ENSG00000101307	10326	HGNC:15928	rs204698	T	C	-0.0641	0.00963148	0.31893	20	545876	2.828e-11	TRUE	0.0012513	44.2925
6247_9	35373	SIRB1	Signal-regulatory protein beta-1	SIRPB1	O00241	ENSG00000101307	10326	HGNC:15928	rs2072965	C	T	0.125	0.00919214	0.388	20	1146136	4.083e-42	TRUE	0.00520086	184.921
6247_9	35368	SIRB1	Signal-regulatory protein beta-1	SIRPB1	O00241	ENSG00000101307	10326	HGNC:15928	rs2076552	T	C	0.069	0.0119733	0.16869	20	1908299	8.271e-09	TRUE	0.000938166	33.2103
6247_9	35371	SIRB1	Signal-regulatory protein beta-1	SIRPB1	O00241	ENSG00000101307	10326	HGNC:15928	rs2076555	G	A	-0.148	0.0127571	0.85955	20	1915736	4.054e-31	TRUE	0.00379095	134.592
6247_9	35373	SIRB1	Signal-regulatory protein beta-1	SIRPB1	O00241	ENSG00000101307	10326	HGNC:15928	rs2092880	G	T	0.1805	0.0104807	0.2395	20	1381939	1.813e-66	TRUE	0.00831569	296.601
6247_9	35368	SIRB1	Signal-regulatory protein beta-1	SIRPB1	O00241	ENSG00000101307	10326	HGNC:15928	rs2099614	C	T	-0.2577	0.0156777	0.08908	20	1812960	1.034e-60	TRUE	0.00758177	270.185
6247_9	35376	SIRB1	Signal-regulatory protein beta-1	SIRPB1	O00241	ENSG00000101307	10326	HGNC:15928	rs2105321	C	T	0.1039	0.0107097	0.22456	20	2039225	2.972e-22	TRUE	0.00265361	94.1184
6247_9	35374	SIRB1	Signal-regulatory protein beta-1	SIRPB1	O00241	ENSG00000101307	10326	HGNC:15928	rs214808	T	C	0.1381	0.014999	0.09821	20	2294328	3.344e-20	TRUE	0.00239093	84.7746
6247_9	35361	SIRB1	Signal-regulatory protein beta-1	SIRPB1	O00241	ENSG00000101307	10326	HGNC:15928	rs2208182	C	T	-0.0685	0.00907691	0.59426	20	615011	4.467e-14	TRUE	0.00160807	56.9515
6247_9	35372	SIRB1	Signal-regulatory protein beta-1	SIRPB1	O00241	ENSG00000101307	10326	HGNC:15928	rs2223839	A	C	1.0612	0.0280716	0.13298	20	1489630	1e-200	TRUE	0.0388351	1429.1
6247_9	35369	SIRB1	Signal-regulatory protein beta-1	SIRPB1	O00241	ENSG00000101307	10326	HGNC:15928	rs2235745	A	G	0.1075	0.0115838	0.81805	20	1917405	1.692e-20	TRUE	0.00242917	86.1217
6247_9	35374	SIRB1	Signal-regulatory protein beta-1	SIRPB1	O00241	ENSG00000101307	10326	HGNC:15928	rs2244133	T	G	-0.8965	0.0237148	0.08633	20	1557954	1e-200	TRUE	0.038833	1429.1
6247_9	35369	SIRB1	Signal-regulatory protein beta-1	SIRPB1	O00241	ENSG00000101307	10326	HGNC:15928	rs2267915	A	G	0.184	0.022233	0.04381	20	1911609	1.274e-16	TRUE	0.00193286	68.4919
6247_9	35367	SIRB1	Signal-regulatory protein beta-1	SIRPB1	O00241	ENSG00000101307	10326	HGNC:15928	rs2267916	C	T	0.0703	0.00903885	0.43588	20	1912310	7.395e-15	TRUE	0.00170753	60.4901
6247_9	35375	SIRB1	Signal-regulatory protein beta-1	SIRPB1	O00241	ENSG00000101307	10326	HGNC:15928	rs2273328	T	A	0.3228	0.0247607	0.03277	20	1678383	7.559e-39	TRUE	0.00478175	169.957
6247_9	35377	SIRB1	Signal-regulatory protein beta-1	SIRPB1	O00241	ENSG00000101307	10326	HGNC:15928	rs2295571	A	C	0.1432	0.0228261	0.95906	20	2188163	3.53e-10	TRUE	0.00111133	39.3569
6247_9	35373	SIRB1	Signal-regulatory protein beta-1	SIRPB1	O00241	ENSG00000101307	10326	HGNC:15928	rs2300184	A	G	-0.3084	0.0358205	0.01668	20	1142484	7.332e-18	TRUE	0.00209126	74.1251
6247_9	35372	SIRB1	Signal-regulatory protein beta-1	SIRPB1	O00241	ENSG00000101307	10326	HGNC:15928	rs2422576	C	A	0.5223	0.0138162	0.62822	20	1490152	1e-200	TRUE	0.0388351	1429.1
6247_9	35371	SIRB1	Signal-regulatory protein beta-1	SIRPB1	O00241	ENSG00000101307	10326	HGNC:15928	rs272904	G	A	-0.8169	0.0457322	0.98986	20	1861390	2.303e-71	TRUE	0.00894067	319.075
6247_9	35359	SIRB1	Signal-regulatory protein beta-1	SIRPB1	O00241	ENSG00000101307	10326	HGNC:15928	rs282153	T	A	-0.2257	0.0253176	0.96786	20	581248	4.889e-19	TRUE	0.00224268	79.4728
6247_9	35365	SIRB1	Signal-regulatory protein beta-1	SIRPB1	O00241	ENSG00000101307	10326	HGNC:15928	rs34797815	C	T	0.0654	0.0110656	0.2091	20	909820	3.417e-09	TRUE	0.000986793	34.9304
6247_9	35374	SIRB1	Signal-regulatory protein beta-1	SIRPB1	O00241	ENSG00000101307	10326	HGNC:15928	rs3746719	A	G	0.3788	0.0100375	0.26704	20	1610790	1e-200	TRUE	0.0387052	1424.21
6247_9	35373	SIRB1	Signal-regulatory protein beta-1	SIRPB1	O00241	ENSG00000101307	10326	HGNC:15928	rs3803949	T	C	-0.1126	0.011116	0.20171	20	1289337	4.086e-24	TRUE	0.0028925	102.607
6247_9	35373	SIRB1	Signal-regulatory protein beta-1	SIRPB1	O00241	ENSG00000101307	10326	HGNC:15928	rs3859635	A	T	0.0767	0.010855	0.22029	20	2142205	1.596e-12	TRUE	0.00140952	49.9267
6247_9	35369	SIRB1	Signal-regulatory protein beta-1	SIRPB1	O00241	ENSG00000101307	10326	HGNC:15928	rs3865535	C	A	0.0692	0.0100193	0.72486	20	2313963	4.961e-12	TRUE	0.00134696	47.7023
6247_9	35370	SIRB1	Signal-regulatory protein beta-1	SIRPB1	O00241	ENSG00000101307	10326	HGNC:15928	rs41279946	C	G	0.3546	0.023523	0.03656	20	2312978	2.379e-51	TRUE	0.00638411	227.244
6247_9	35373	SIRB1	Signal-regulatory protein beta-1	SIRPB1	O00241	ENSG00000101307	10326	HGNC:15928	rs45503795	G	A	0.1228	0.0201632	0.05141	20	1963995	1.127e-09	TRUE	0.00104755	37.0917
6247_9	35372	SIRB1	Signal-regulatory protein beta-1	SIRPB1	O00241	ENSG00000101307	10326	HGNC:15928	rs45592035	G	A	-0.1623	0.028631	0.02468	20	2305872	1.439e-08	TRUE	0.000907684	32.134
6247_9	35371	SIRB1	Signal-regulatory protein beta-1	SIRPB1	O00241	ENSG00000101307	10326	HGNC:15928	rs4813309	T	C	0.0809	0.0146095	0.10407	20	1880550	3.068e-08	TRUE	0.000866224	30.664
6247_9	35368	SIRB1	Signal-regulatory protein beta-1	SIRPB1	O00241	ENSG00000101307	10326	HGNC:15928	rs4813923	A	G	0.2789	0.0124346	0.15008	20	1077097	2.034e-111	TRUE	0.0140254	503.078
6247_9	35366	SIRB1	Signal-regulatory protein beta-1	SIRPB1	O00241	ENSG00000101307	10326	HGNC:15928	rs4816178	C	G	0.1761	0.0167453	0.07821	20	1031449	7.259e-26	TRUE	0.00311758	110.595
6247_9	35364	SIRB1	Signal-regulatory protein beta-1	SIRPB1	O00241	ENSG00000101307	10326	HGNC:15928	rs534498	A	G	-0.0669	0.0107859	0.22589	20	920953	5.556e-10	TRUE	0.00108675	38.4715
6247_9	35364	SIRB1	Signal-regulatory protein beta-1	SIRPB1	O00241	ENSG00000101307	10326	HGNC:15928	rs553378	G	A	0.2577	0.0188524	0.9406	20	901882	1.548e-42	TRUE	0.00525617	186.851
6247_9	35374	SIRB1	Signal-regulatory protein beta-1	SIRPB1	O00241	ENSG00000101307	10326	HGNC:15928	rs55650624	G	C	0.8367	0.0225566	0.03748	20	1560892	1e-200	TRUE	0.0374421	1375.92
6247_9	35373	SIRB1	Signal-regulatory protein beta-1	SIRPB1	O00241	ENSG00000101307	10326	HGNC:15928	rs55813776	G	A	-0.6703	0.0402706	0.01252	20	1297749	3.296e-62	TRUE	0.00777187	277.052
6247_9	35361	SIRB1	Signal-regulatory protein beta-1	SIRPB1	O00241	ENSG00000101307	10326	HGNC:15928	rs55979979	A	T	0.0731	0.010031	0.27595	20	751671	3.159e-13	TRUE	0.00149968	53.1068
6247_9	35358	SIRB1	Signal-regulatory protein beta-1	SIRPB1	O00241	ENSG00000101307	10326	HGNC:15928	rs56121064	C	G	0.116	0.0197229	0.05723	20	691385	4.066e-09	TRUE	0.000977431	34.5919
6247_9	35360	SIRB1	Signal-regulatory protein beta-1	SIRPB1	O00241	ENSG00000101307	10326	HGNC:15928	rs56210940	G	A	0.116	0.0152157	0.09715	20	734617	2.465e-14	TRUE	0.00164108	58.1208
6247_9	35373	SIRB1	Signal-regulatory protein beta-1	SIRPB1	O00241	ENSG00000101307	10326	HGNC:15928	rs56246307	A	G	-0.5262	0.0304281	0.02225	20	1301787	5.292e-67	TRUE	0.00838393	299.055
6247_9	35360	SIRB1	Signal-regulatory protein beta-1	SIRPB1	O00241	ENSG00000101307	10326	HGNC:15928	rs56256143	A	C	-0.0799	0.0141355	0.11294	20	889904	1.582e-08	TRUE	0.000902796	31.9499
6247_9	35371	SIRB1	Signal-regulatory protein beta-1	SIRPB1	O00241	ENSG00000101307	10326	HGNC:15928	rs56846668	T	C	-0.3498	0.0412472	0.01237	20	1090685	2.241e-17	TRUE	0.00202929	71.92
6247_9	35368	SIRB1	Signal-regulatory protein beta-1	SIRPB1	O00241	ENSG00000101307	10326	HGNC:15928	rs58119029	A	G	0.1044	0.0124691	0.15325	20	1899473	5.632e-17	TRUE	0.00197826	70.1019
6247_9	35371	SIRB1	Signal-regulatory protein beta-1	SIRPB1	O00241	ENSG00000101307	10326	HGNC:15928	rs58623386	T	C	0.3755	0.0409174	0.01185	20	1843460	4.432e-20	TRUE	0.00237546	84.2176
6247_9	35364	SIRB1	Signal-regulatory protein beta-1	SIRPB1	O00241	ENSG00000101307	10326	HGNC:15928	rs59329458	A	G	0.3327	0.0212285	0.04811	20	1025678	2.338e-55	TRUE	0.00689803	245.622
6247_9	35371	SIRB1	Signal-regulatory protein beta-1	SIRPB1	O00241	ENSG00000101307	10326	HGNC:15928	rs59929871	A	G	0.2572	0.023609	0.03823	20	1878024	1.229e-27	TRUE	0.00334433	118.683
6247_9	35372	SIRB1	Signal-regulatory protein beta-1	SIRPB1	O00241	ENSG00000101307	10326	HGNC:15928	rs6033024	C	T	0.0661	0.00975594	0.30435	20	1159472	1.241e-11	TRUE	0.00129618	45.9055
6247_9	35373	SIRB1	Signal-regulatory protein beta-1	SIRPB1	O00241	ENSG00000101307	10326	HGNC:15928	rs6033290	A	G	-0.1104	0.0173771	0.07217	20	1258858	2.109e-10	TRUE	0.00113983	40.363
6247_9	35378	SIRB1	Signal-regulatory protein beta-1	SIRPB1	O00241	ENSG00000101307	10326	HGNC:15928	rs6035844	G	T	0.1397	0.0209438	0.04685	20	2185724	2.554e-11	TRUE	0.00125611	44.492
6247_9	35382	SIRB1	Signal-regulatory protein beta-1	SIRPB1	O00241	ENSG00000101307	10326	HGNC:15928	rs6036852	A	G	-0.0676	0.012359	0.1546	20	2514130	4.508e-08	TRUE	0.000844894	29.9176
6247_9	35359	SIRB1	Signal-regulatory protein beta-1	SIRPB1	O00241	ENSG00000101307	10326	HGNC:15928	rs6038199	A	G	0.0844	0.0123116	0.15892	20	606714	7.115e-12	TRUE	0.00132741	46.9955
6247_9	35367	SIRB1	Signal-regulatory protein beta-1	SIRPB1	O00241	ENSG00000101307	10326	HGNC:15928	rs6039513	G	C	0.0839	0.0125552	0.15258	20	1010326	2.349e-11	TRUE	0.00126112	44.6558
6247_9	35372	SIRB1	Signal-regulatory protein beta-1	SIRPB1	O00241	ENSG00000101307	10326	HGNC:15928	rs6040929	G	C	-0.1145	0.0119218	0.17192	20	1236887	7.671e-22	TRUE	0.00260113	92.2417
6247_9	35373	SIRB1	Signal-regulatory protein beta-1	SIRPB1	O00241	ENSG00000101307	10326	HGNC:15928	rs6041558	T	C	0.1246	0.00969629	0.31289	20	1322244	8.571e-38	TRUE	0.0046468	165.129
6247_9	35373	SIRB1	Signal-regulatory protein beta-1	SIRPB1	O00241	ENSG00000101307	10326	HGNC:15928	rs6041861	G	A	-0.0878	0.0109484	0.2115	20	1362406	1.062e-15	TRUE	0.00181491	64.3119
6247_9	35373	SIRB1	Signal-regulatory protein beta-1	SIRPB1	O00241	ENSG00000101307	10326	HGNC:15928	rs6044675	A	G	0.1999	0.00904972	0.40646	20	1771640	4.024e-108	TRUE	0.0136069	487.928
6247_9	35370	SIRB1	Signal-regulatory protein beta-1	SIRPB1	O00241	ENSG00000101307	10326	HGNC:15928	rs6045236	A	G	-0.0813	0.0133629	0.12902	20	1870938	1.172e-09	TRUE	0.00104548	37.0154
6247_9	35377	SIRB1	Signal-regulatory protein beta-1	SIRPB1	O00241	ENSG00000101307	10326	HGNC:15928	rs6046738	A	T	0.2592	0.0443031	0.98963	20	2074270	4.898e-09	TRUE	0.000966684	34.2295
6247_9	35377	SIRB1	Signal-regulatory protein beta-1	SIRPB1	O00241	ENSG00000101307	10326	HGNC:15928	rs6047071	T	G	0.3547	0.0199601	0.05243	20	2135091	1.198e-70	TRUE	0.00884788	315.788
6247_9	35378	SIRB1	Signal-regulatory protein beta-1	SIRPB1	O00241	ENSG00000101307	10326	HGNC:15928	rs6047328	T	A	-0.1159	0.00922685	0.38216	20	2176984	3.452e-36	TRUE	0.00444036	157.783
6247_9	35375	SIRB1	Signal-regulatory protein beta-1	SIRPB1	O00241	ENSG00000101307	10326	HGNC:15928	rs6047615	T	C	-0.0988	0.0122625	0.84299	20	2228871	7.812e-16	TRUE	0.00183185	64.917
6247_9	35358	SIRB1	Signal-regulatory protein beta-1	SIRPB1	O00241	ENSG00000101307	10326	HGNC:15928	rs6053376	G	A	0.0893	0.0108014	0.21911	20	593318	1.369e-16	TRUE	0.00192947	68.3501
6247_9	35363	SIRB1	Signal-regulatory protein beta-1	SIRPB1	O00241	ENSG00000101307	10326	HGNC:15928	rs6055525	C	G	-0.0892	0.00991396	0.28757	20	861386	2.311e-19	TRUE	0.00228411	80.9534
6247_9	35364	SIRB1	Signal-regulatory protein beta-1	SIRPB1	O00241	ENSG00000101307	10326	HGNC:15928	rs6055747	T	C	0.1488	0.0170154	0.07689	20	885414	2.23e-18	TRUE	0.00215797	76.4752
6247_9	35368	SIRB1	Signal-regulatory protein beta-1	SIRPB1	O00241	ENSG00000101307	10326	HGNC:15928	rs6056276	T	C	-0.1657	0.0196248	0.05637	20	946366	3.082e-17	TRUE	0.00201176	71.2912
6247_9	35364	SIRB1	Signal-regulatory protein beta-1	SIRPB1	O00241	ENSG00000101307	10326	HGNC:15928	rs6056592	A	G	-0.0775	0.0121254	0.16293	20	991284	1.642e-10	TRUE	0.00115392	40.8521
6247_9	35367	SIRB1	Signal-regulatory protein beta-1	SIRPB1	O00241	ENSG00000101307	10326	HGNC:15928	rs6056778	A	G	0.0841	0.00938528	0.35318	20	1016978	3.222e-19	TRUE	0.00226537	80.2967
6247_9	35363	SIRB1	Signal-regulatory protein beta-1	SIRPB1	O00241	ENSG00000101307	10326	HGNC:15928	rs6056847	A	G	0.0863	0.0090802	0.44379	20	1028346	2.016e-21	TRUE	0.00254799	90.3297
6247_9	35374	SIRB1	Signal-regulatory protein beta-1	SIRPB1	O00241	ENSG00000101307	10326	HGNC:15928	rs6074927	G	A	0.4065	0.010753	0.63628	20	1613956	1e-200	TRUE	0.038833	1429.1
6247_9	35368	SIRB1	Signal-regulatory protein beta-1	SIRPB1	O00241	ENSG00000101307	10326	HGNC:15928	rs6075305	C	G	-0.0591	0.00920404	0.38803	20	1876538	1.353e-10	TRUE	0.00116446	41.2304
6247_9	35376	SIRB1	Signal-regulatory protein beta-1	SIRPB1	O00241	ENSG00000101307	10326	HGNC:15928	rs6075588	G	A	-0.19	0.0283434	0.02599	20	2040434	2.035e-11	TRUE	0.00126872	44.9368
6247_9	35373	SIRB1	Signal-regulatory protein beta-1	SIRPB1	O00241	ENSG00000101307	10326	HGNC:15928	rs6078095	A	G	-0.182	0.0102925	0.25485	20	1171788	5.684e-70	TRUE	0.00876265	312.683
6247_9	35373	SIRB1	Signal-regulatory protein beta-1	SIRPB1	O00241	ENSG00000101307	10326	HGNC:15928	rs6078462	C	T	0.1741	0.0125098	0.1522	20	1267130	4.989e-44	TRUE	0.00544599	193.685
6247_9	35373	SIRB1	Signal-regulatory protein beta-1	SIRPB1	O00241	ENSG00000101307	10326	HGNC:15928	rs6078982	C	G	-0.3473	0.0107169	0.21631	20	1382500	1e-200	TRUE	0.0288348	1050.2
6247_9	35374	SIRB1	Signal-regulatory protein beta-1	SIRPB1	O00241	ENSG00000101307	10326	HGNC:15928	rs6079967	T	C	-0.195	0.00888918	0.49036	20	1629906	1.158e-106	TRUE	0.013422	481.223
6247_9	35375	SIRB1	Signal-regulatory protein beta-1	SIRPB1	O00241	ENSG00000101307	10326	HGNC:15928	rs6080025	T	C	0.7754	0.020822	0.04771	20	1644290	1e-200	TRUE	0.0377254	1386.78
6247_9	35374	SIRB1	Signal-regulatory protein beta-1	SIRPB1	O00241	ENSG00000101307	10326	HGNC:15928	rs6081439	G	C	-0.255	0.0286955	0.02499	20	1947391	6.312e-19	TRUE	0.00222753	78.9681
6247_9	35372	SIRB1	Signal-regulatory protein beta-1	SIRPB1	O00241	ENSG00000101307	10326	HGNC:15928	rs6082807	A	G	0.0902	0.00910174	0.40849	20	2327695	3.759e-23	TRUE	0.00276902	98.212
6247_9	35382	SIRB1	Signal-regulatory protein beta-1	SIRPB1	O00241	ENSG00000101307	10326	HGNC:15928	rs6083584	A	G	0.0673	0.0113718	0.80756	20	2520925	3.256e-09	TRUE	0.00098897	35.0244
6247_9	35358	SIRB1	Signal-regulatory protein beta-1	SIRPB1	O00241	ENSG00000101307	10326	HGNC:15928	rs6085416	A	G	-0.0565	0.0102423	0.25837	20	666289	3.461e-08	TRUE	0.000859939	30.4302
6247_9	35361	SIRB1	Signal-regulatory protein beta-1	SIRPB1	O00241	ENSG00000101307	10326	HGNC:15928	rs6085962	A	G	-0.1544	0.0253235	0.03226	20	779960	1.08e-09	TRUE	0.00105025	37.1748
6247_9	35363	SIRB1	Signal-regulatory protein beta-1	SIRPB1	O00241	ENSG00000101307	10326	HGNC:15928	rs6086225	T	C	-0.246	0.0199647	0.05177	20	832503	6.916e-35	TRUE	0.00427524	151.826
6247_9	35367	SIRB1	Signal-regulatory protein beta-1	SIRPB1	O00241	ENSG00000101307	10326	HGNC:15928	rs6086607	G	A	0.1152	0.00933714	0.35544	20	934003	5.667e-35	TRUE	0.00428586	152.222
6247_9	35367	SIRB1	Signal-regulatory protein beta-1	SIRPB1	O00241	ENSG00000101307	10326	HGNC:15928	rs6086731	A	G	0.1544	0.0133279	0.13096	20	954203	4.924e-31	TRUE	0.00378055	134.206
6247_9	35371	SIRB1	Signal-regulatory protein beta-1	SIRPB1	O00241	ENSG00000101307	10326	HGNC:15928	rs6105738	C	T	0.3028	0.0150484	0.09686	20	1784047	4.757e-90	TRUE	0.0113179	404.886
6247_9	35368	SIRB1	Signal-regulatory protein beta-1	SIRPB1	O00241	ENSG00000101307	10326	HGNC:15928	rs6105929	C	T	-0.1243	0.0213023	0.04553	20	1901059	5.377e-09	TRUE	0.000961806	34.048
6247_9	35374	SIRB1	Signal-regulatory protein beta-1	SIRPB1	O00241	ENSG00000101307	10326	HGNC:15928	rs6106524	T	C	-0.0674	0.010399	0.24618	20	2308430	9.089e-11	TRUE	0.0011862	42.0082
6247_9	35373	SIRB1	Signal-regulatory protein beta-1	SIRPB1	O00241	ENSG00000101307	10326	HGNC:15928	rs6109390	A	G	0.531	0.0176063	0.07195	20	1291826	8.012e-200	TRUE	0.0250714	909.605
6247_9	35373	SIRB1	Signal-regulatory protein beta-1	SIRPB1	O00241	ENSG00000101307	10326	HGNC:15928	rs6111448	A	G	0.5555	0.0182045	0.06361	20	1770607	1e-200	TRUE	0.0256494	931.129
6247_9	35375	SIRB1	Signal-regulatory protein beta-1	SIRPB1	O00241	ENSG00000101307	10326	HGNC:15928	rs6112614	G	A	0.3183	0.0263807	0.02968	20	2036864	1.604e-33	TRUE	0.00409869	145.58
6247_9	35362	SIRB1	Signal-regulatory protein beta-1	SIRPB1	O00241	ENSG00000101307	10326	HGNC:15928	rs6116796	A	T	0.2195	0.0273425	0.02705	20	598195	9.924e-16	TRUE	0.00181924	64.4455
6247_9	35366	SIRB1	Signal-regulatory protein beta-1	SIRPB1	O00241	ENSG00000101307	10326	HGNC:15928	rs6118354	C	T	0.1176	0.0194307	0.94307	20	937267	1.428e-09	TRUE	0.00103473	36.6302
6247_9	35373	SIRB1	Signal-regulatory protein beta-1	SIRPB1	O00241	ENSG00000101307	10326	HGNC:15928	rs6131519	T	C	0.1708	0.00930417	0.35978	20	1428567	2.883e-75	TRUE	0.00943745	336.993
6247_9	35373	SIRB1	Signal-regulatory protein beta-1	SIRPB1	O00241	ENSG00000101307	10326	HGNC:15928	rs6135852	G	A	0.0828	0.0103498	0.24934	20	1721027	1.243e-15	TRUE	0.00180618	64.0019
6247_9	35370	SIRB1	Signal-regulatory protein beta-1	SIRPB1	O00241	ENSG00000101307	10326	HGNC:15928	rs6137695	T	C	-0.0566	0.00910662	0.58761	20	2310725	5.124e-10	TRUE	0.00109102	38.6294
6247_9	35382	SIRB1	Signal-regulatory protein beta-1	SIRPB1	O00241	ENSG00000101307	10326	HGNC:15928	rs6138358	A	G	0.084	0.0095159	0.32352	20	2526895	1.072e-18	TRUE	0.00219759	77.9218
6247_9	35366	SIRB1	Signal-regulatory protein beta-1	SIRPB1	O00241	ENSG00000101307	10326	HGNC:15928	rs6140700	A	G	0.1307	0.0118987	0.17239	20	923206	4.544e-28	TRUE	0.00340024	120.656
6247_9	35365	SIRB1	Signal-regulatory protein beta-1	SIRPB1	O00241	ENSG00000101307	10326	HGNC:15928	rs6140951	T	C	0.0804	0.00896632	0.54682	20	999752	3.05e-19	TRUE	0.00226855	80.4051
6247_9	35373	SIRB1	Signal-regulatory protein beta-1	SIRPB1	O00241	ENSG00000101307	10326	HGNC:15928	rs62186877	G	A	0.6509	0.017218	0.09168	20	1440442	1e-200	TRUE	0.038834	1429.1
6247_9	35373	SIRB1	Signal-regulatory protein beta-1	SIRPB1	O00241	ENSG00000101307	10326	HGNC:15928	rs62186929	C	G	0.1387	0.0227407	0.04147	20	1145436	1.066e-09	TRUE	0.00105061	37.2003
6247_9	35362	SIRB1	Signal-regulatory protein beta-1	SIRPB1	O00241	ENSG00000101307	10326	HGNC:15928	rs62187498	C	G	0.1197	0.0214681	0.04784	20	873739	2.465e-08	TRUE	0.000878433	31.0887
6247_9	35368	SIRB1	Signal-regulatory protein beta-1	SIRPB1	O00241	ENSG00000101307	10326	HGNC:15928	rs62187516	T	C	-0.2115	0.0247811	0.03468	20	937093	1.405e-17	TRUE	0.00205541	72.8414
6247_9	35373	SIRB1	Signal-regulatory protein beta-1	SIRPB1	O00241	ENSG00000101307	10326	HGNC:15928	rs62187547	C	G	0.1489	0.0147496	0.10156	20	1351846	5.8e-24	TRUE	0.00287299	101.913
6247_9	35359	SIRB1	Signal-regulatory protein beta-1	SIRPB1	O00241	ENSG00000101307	10326	HGNC:15928	rs62192063	T	C	0.13	0.0123	0.15749	20	659750	4.146e-26	TRUE	0.0031494	111.705
6247_9	35373	SIRB1	Signal-regulatory protein beta-1	SIRPB1	O00241	ENSG00000101307	10326	HGNC:15928	rs62192664	A	G	-0.2124	0.0205604	0.05066	20	1766112	5.127e-25	TRUE	0.00300809	106.72
6247_9	35375	SIRB1	Signal-regulatory protein beta-1	SIRPB1	O00241	ENSG00000101307	10326	HGNC:15928	rs62192742	C	A	0.3762	0.0300009	0.02422	20	1979173	4.531e-36	TRUE	0.00442559	157.242
6247_9	35379	SIRB1	Signal-regulatory protein beta-1	SIRPB1	O00241	ENSG00000101307	10326	HGNC:15928	rs62192949	T	C	-0.1827	0.0293154	0.02386	20	2492919	4.599e-10	TRUE	0.0010967	38.8404
6247_9	35362	SIRB1	Signal-regulatory protein beta-1	SIRPB1	O00241	ENSG00000101307	10326	HGNC:15928	rs649470	G	A	0.176	0.0276047	0.97287	20	766224	1.821e-10	TRUE	0.00114828	40.6499
6247_9	35363	SIRB1	Signal-regulatory protein beta-1	SIRPB1	O00241	ENSG00000101307	10326	HGNC:15928	rs66496369	T	G	0.0742	0.0105256	0.23615	20	824522	1.796e-12	TRUE	0.00140339	49.695
6247_9	35370	SIRB1	Signal-regulatory protein beta-1	SIRPB1	O00241	ENSG00000101307	10326	HGNC:15928	rs687913	C	T	-0.0634	0.00932349	0.64061	20	1785597	1.046e-11	TRUE	0.0013057	46.2404
6247_9	35372	SIRB1	Signal-regulatory protein beta-1	SIRPB1	O00241	ENSG00000101307	10326	HGNC:15928	rs715218	A	G	0.3151	0.00884096	0.47812	20	1472424	1e-200	TRUE	0.0346688	1270.27
6247_9	35374	SIRB1	Signal-regulatory protein beta-1	SIRPB1	O00241	ENSG00000101307	10326	HGNC:15928	rs7271240	A	C	-0.7623	0.0201649	0.22342	20	1516906	1e-200	TRUE	0.038833	1429.1
6247_9	35369	SIRB1	Signal-regulatory protein beta-1	SIRPB1	O00241	ENSG00000101307	10326	HGNC:15928	rs73067946	C	A	-0.2667	0.0189472	0.05924	20	1070044	5.338e-45	TRUE	0.00557098	198.132
6247_9	35377	SIRB1	Signal-regulatory protein beta-1	SIRPB1	O00241	ENSG00000101307	10326	HGNC:15928	rs73069044	C	T	-0.2712	0.0197482	0.05548	20	2232417	6.45e-43	TRUE	0.00530297	188.593
6247_9	35370	SIRB1	Signal-regulatory protein beta-1	SIRPB1	O00241	ENSG00000101307	10326	HGNC:15928	rs73069298	T	C	-0.246	0.0391492	0.01332	20	1908858	3.307e-10	TRUE	0.00111514	39.4843
6247_9	35373	SIRB1	Signal-regulatory protein beta-1	SIRPB1	O00241	ENSG00000101307	10326	HGNC:15928	rs73071674	C	T	-0.1231	0.0159421	0.08753	20	1129862	1.148e-14	TRUE	0.00168285	59.6245
6247_9	35362	SIRB1	Signal-regulatory protein beta-1	SIRPB1	O00241	ENSG00000101307	10326	HGNC:15928	rs73073602	A	G	-0.1194	0.0155238	0.09303	20	837424	1.455e-14	TRUE	0.00167023	59.1581
6247_9	35378	SIRB1	Signal-regulatory protein beta-1	SIRPB1	O00241	ENSG00000101307	10326	HGNC:15928	rs73074252	G	C	0.1195	0.0180741	0.06597	20	2125793	3.8e-11	TRUE	0.00123418	43.7142
6247_9	35361	SIRB1	Signal-regulatory protein beta-1	SIRPB1	O00241	ENSG00000101307	10326	HGNC:15928	rs73078931	G	A	-0.2759	0.0272356	0.02766	20	603595	4.062e-24	TRUE	0.00289381	102.619
6247_9	35357	SIRB1	Signal-regulatory protein beta-1	SIRPB1	O00241	ENSG00000101307	10326	HGNC:15928	rs73078992	T	C	-0.0776	0.00966181	0.31646	20	631139	9.619e-16	TRUE	0.00182123	64.507
6247_9	35374	SIRB1	Signal-regulatory protein beta-1	SIRPB1	O00241	ENSG00000101307	10326	HGNC:15928	rs73080809	A	G	-0.1896	0.0282916	0.02549	20	2270107	2.061e-11	TRUE	0.00126809	44.9119
6247_9	35380	SIRB1	Signal-regulatory protein beta-1	SIRPB1	O00241	ENSG00000101307	10326	HGNC:15928	rs73081303	A	G	-0.3205	0.0406331	0.01216	20	2414688	3.079e-15	TRUE	0.0017555	62.2152
6247_9	35372	SIRB1	Signal-regulatory protein beta-1	SIRPB1	O00241	ENSG00000101307	10326	HGNC:15928	rs73081380	T	A	-0.177	0.0101434	0.25971	20	1837896	3.456e-68	TRUE	0.00853536	304.495
6247_9	35362	SIRB1	Signal-regulatory protein beta-1	SIRPB1	O00241	ENSG00000101307	10326	HGNC:15928	rs73565264	G	A	-0.1261	0.0186122	0.06136	20	896155	1.243e-11	TRUE	0.00129646	45.9023
6247_9	35374	SIRB1	Signal-regulatory protein beta-1	SIRPB1	O00241	ENSG00000101307	10326	HGNC:15928	rs73604175	T	C	0.4111	0.0141597	0.11066	20	1538379	2.511e-185	TRUE	0.0232756	842.924
6247_9	35368	SIRB1	Signal-regulatory protein beta-1	SIRPB1	O00241	ENSG00000101307	10326	HGNC:15928	rs74181565	C	G	-0.2089	0.015116	0.09462	20	1043998	1.936e-43	TRUE	0.00537129	190.987
6247_9	35363	SIRB1	Signal-regulatory protein beta-1	SIRPB1	O00241	ENSG00000101307	10326	HGNC:15928	rs74556695	T	C	0.368	0.03275	0.01939	20	877966	2.694e-29	TRUE	0.00355796	126.262
6247_9	35371	SIRB1	Signal-regulatory protein beta-1	SIRPB1	O00241	ENSG00000101307	10326	HGNC:15928	rs74560714	T	C	-0.369	0.0418707	0.01117	20	1885085	1.22e-18	TRUE	0.00219108	77.6664
6247_9	35359	SIRB1	Signal-regulatory protein beta-1	SIRPB1	O00241	ENSG00000101307	10326	HGNC:15928	rs74654283	G	T	-0.2823	0.0328987	0.01892	20	560981	9.415e-18	TRUE	0.00207819	73.6315
6247_9	35368	SIRB1	Signal-regulatory protein beta-1	SIRPB1	O00241	ENSG00000101307	10326	HGNC:15928	rs74842117	A	G	-0.3998	0.0429625	0.01049	20	1897973	1.33e-20	TRUE	0.00244263	86.5977
6247_9	35372	SIRB1	Signal-regulatory protein beta-1	SIRPB1	O00241	ENSG00000101307	10326	HGNC:15928	rs75001629	T	C	0.1658	0.0277972	0.02583	20	1760152	2.452e-09	TRUE	0.00100483	35.5767
6247_9	35377	SIRB1	Signal-regulatory protein beta-1	SIRPB1	O00241	ENSG00000101307	10326	HGNC:15928	rs75800084	T	C	0.1425	0.0237516	0.03749	20	2228212	1.978e-09	TRUE	0.0010165	35.9952
6247_9	35365	SIRB1	Signal-regulatory protein beta-1	SIRPB1	O00241	ENSG00000101307	10326	HGNC:15928	rs75856642	G	C	0.0959	0.0142625	0.11193	20	978501	1.769e-11	TRUE	0.00127685	45.2111
6247_9	35372	SIRB1	Signal-regulatory protein beta-1	SIRPB1	O00241	ENSG00000101307	10326	HGNC:15928	rs75951257	G	A	0.5873	0.0411886	0.01327	20	1484853	3.952e-46	TRUE	0.00571533	203.313
6247_9	35361	SIRB1	Signal-regulatory protein beta-1	SIRPB1	O00241	ENSG00000101307	10326	HGNC:15928	rs76137931	A	G	0.2261	0.027099	0.02837	20	714773	7.214e-17	TRUE	0.0019649	69.6135
6247_9	35380	SIRB1	Signal-regulatory protein beta-1	SIRPB1	O00241	ENSG00000101307	10326	HGNC:15928	rs763996	G	A	-0.0595	0.0102713	0.74438	20	2421233	6.92e-09	TRUE	0.000947633	33.5572
6247_9	35378	SIRB1	Signal-regulatory protein beta-1	SIRPB1	O00241	ENSG00000101307	10326	HGNC:15928	rs76995236	A	G	-0.1443	0.0188675	0.05876	20	2381819	2.04e-14	TRUE	0.00165074	58.4931
6247_9	35373	SIRB1	Signal-regulatory protein beta-1	SIRPB1	O00241	ENSG00000101307	10326	HGNC:15928	rs77252852	T	C	-0.6587	0.0256604	0.03058	20	1422118	2.533e-145	TRUE	0.0182888	658.946
6247_9	35373	SIRB1	Signal-regulatory protein beta-1	SIRPB1	O00241	ENSG00000101307	10326	HGNC:15928	rs77729037	T	C	0.862	0.0228022	0.04188	20	1738850	1e-200	TRUE	0.038834	1429.1
6247_9	35378	SIRB1	Signal-regulatory protein beta-1	SIRPB1	O00241	ENSG00000101307	10326	HGNC:15928	rs77851109	T	C	-0.1833	0.0212832	0.04654	20	2119246	7.154e-18	TRUE	0.00209233	74.1736
6247_9	35373	SIRB1	Signal-regulatory protein beta-1	SIRPB1	O00241	ENSG00000101307	10326	HGNC:15928	rs77882535	A	G	0.177	0.0214538	0.04453	20	1460055	1.58e-16	TRUE	0.00192069	68.0674
6247_9	35371	SIRB1	Signal-regulatory protein beta-1	SIRPB1	O00241	ENSG00000101307	10326	HGNC:15928	rs77985164	T	C	0.2286	0.0188364	0.05995	20	1857460	6.802e-34	TRUE	0.00414694	147.284
6247_9	35360	SIRB1	Signal-regulatory protein beta-1	SIRPB1	O00241	ENSG00000101307	10326	HGNC:15928	rs78220244	A	G	-0.1577	0.0284879	0.02483	20	696380	3.1e-08	TRUE	0.000865925	30.6439
6247_9	35359	SIRB1	Signal-regulatory protein beta-1	SIRPB1	O00241	ENSG00000101307	10326	HGNC:15928	rs78288000	G	A	-0.1608	0.0221836	0.04101	20	645422	4.211e-13	TRUE	0.00148384	52.5422
6247_9	35366	SIRB1	Signal-regulatory protein beta-1	SIRPB1	O00241	ENSG00000101307	10326	HGNC:15928	rs78495223	A	G	0.2945	0.0353025	0.01614	20	922173	7.293e-17	TRUE	0.00196401	69.5921
6247_9	35368	SIRB1	Signal-regulatory protein beta-1	SIRPB1	O00241	ENSG00000101307	10326	HGNC:15928	rs78998377	C	G	0.1287	0.0187673	0.06177	20	939061	6.999e-12	TRUE	0.00132798	47.0277
6247_9	35374	SIRB1	Signal-regulatory protein beta-1	SIRPB1	O00241	ENSG00000101307	10326	HGNC:15928	rs79020972	A	G	0.4221	0.0313828	0.02092	20	1682344	3.077e-41	TRUE	0.00508829	180.904
6247_9	35374	SIRB1	Signal-regulatory protein beta-1	SIRPB1	O00241	ENSG00000101307	10326	HGNC:15928	rs79039084	A	G	0.3388	0.0290774	0.02432	20	1609940	2.25e-31	TRUE	0.00382343	135.761
6247_9	35373	SIRB1	Signal-regulatory protein beta-1	SIRPB1	O00241	ENSG00000101307	10326	HGNC:15928	rs79324479	C	T	0.2744	0.0387403	0.01296	20	1737954	1.41e-12	TRUE	0.00141638	50.1698
6247_9	35378	SIRB1	Signal-regulatory protein beta-1	SIRPB1	O00241	ENSG00000101307	10326	HGNC:15928	rs79547475	A	G	-0.1582	0.0217228	0.0447	20	2461174	3.273e-13	TRUE	0.001497	53.0371
6247_9	35362	SIRB1	Signal-regulatory protein beta-1	SIRPB1	O00241	ENSG00000101307	10326	HGNC:15928	rs79709312	T	C	-0.3747	0.0347257	0.01732	20	816960	3.826e-27	TRUE	0.0032819	116.43
6247_9	35374	SIRB1	Signal-regulatory protein beta-1	SIRPB1	O00241	ENSG00000101307	10326	HGNC:15928	rs79731914	T	C	-0.2659	0.0303451	0.02109	20	1623175	1.909e-18	TRUE	0.002166	76.7821
6247_9	35360	SIRB1	Signal-regulatory protein beta-1	SIRPB1	O00241	ENSG00000101307	10326	HGNC:15928	rs805861	T	A	0.0893	0.00986294	0.29323	20	781570	1.377e-19	TRUE	0.00231311	81.9767
6247_9	35373	SIRB1	Signal-regulatory protein beta-1	SIRPB1	O00241	ENSG00000101307	10326	HGNC:15928	rs8118276	T	C	-0.1233	0.0192266	0.05731	20	1471714	1.427e-10	TRUE	0.00116136	41.1263
6247_9	35362	SIRB1	Signal-regulatory protein beta-1	SIRPB1	O00241	ENSG00000101307	10326	HGNC:15928	rs8121246	C	G	-0.1569	0.0126833	0.14371	20	823648	3.77e-35	TRUE	0.00430917	153.032
6247_9	35373	SIRB1	Signal-regulatory protein beta-1	SIRPB1	O00241	ENSG00000101307	10326	HGNC:15928	rs8392	C	T	0.121	0.00908143	0.42019	20	1350709	1.681e-40	TRUE	0.00499391	177.526
6247_9	35374	SIRB1	Signal-regulatory protein beta-1	SIRPB1	O00241	ENSG00000101307	10326	HGNC:15928	rs869220	C	T	0.0654	0.0110975	0.79999	20	2033627	3.788e-09	TRUE	0.00098088	34.7297
6247_9	35356	SIRB1	Signal-regulatory protein beta-1	SIRPB1	O00241	ENSG00000101307	10326	HGNC:15928	rs911445	G	T	0.0886	0.0137648	0.11938	20	547749	1.221e-10	TRUE	0.00117052	41.4311
6247_9	35367	SIRB1	Signal-regulatory protein beta-1	SIRPB1	O00241	ENSG00000101307	10326	HGNC:15928	rs927111	T	G	0.5358	0.0252724	0.03292	20	1801529	9.347e-100	TRUE	0.0125503	449.483
6247_9	35373	SIRB1	Signal-regulatory protein beta-1	SIRPB1	O00241	ENSG00000101307	10326	HGNC:15928	rs965805	C	T	0.4625	0.0148225	0.90086	20	1455168	1e-200	TRUE	0.0267879	973.597
9790_28	35360	BR serine/threonine kinase 2	Serine/threonine-protein kinase BRSK2	BRSK2	Q8IWQ3	ENSG00000174672	9024	HGNC:11405	rs112710233	C	T	0.0592	0.0101351	0.19886	11	1545198	5.187e-09	TRUE	0.000963999	34.118
9790_28	35359	BR serine/threonine kinase 2	Serine/threonine-protein kinase BRSK2	BRSK2	Q8IWQ3	ENSG00000174672	9024	HGNC:11405	rs117431642	T	C	0.2032	0.0354411	0.01362	11	1328587	9.84e-09	TRUE	0.00092887	32.8726
9790_28	35359	BR serine/threonine kinase 2	Serine/threonine-protein kinase BRSK2	BRSK2	Q8IWQ3	ENSG00000174672	9024	HGNC:11405	rs2075859	T	C	-0.0578	0.00820417	0.40493	11	1250488	1.852e-12	TRUE	0.00140185	49.6348
9790_28	35352	BR serine/threonine kinase 2	Serine/threonine-protein kinase BRSK2	BRSK2	Q8IWQ3	ENSG00000174672	9024	HGNC:11405	rs34434067	A	G	-0.0493	0.00826586	0.39003	11	1098337	2.457e-09	TRUE	0.00100529	35.5728
9790_28	35358	BR serine/threonine kinase 2	Serine/threonine-protein kinase BRSK2	BRSK2	Q8IWQ3	ENSG00000174672	9024	HGNC:11405	rs4255564	T	C	-0.1739	0.00980843	0.78542	11	1405725	2.476e-70	TRUE	0.00881237	314.34
9790_28	35356	BR serine/threonine kinase 2	Serine/threonine-protein kinase BRSK2	BRSK2	Q8IWQ3	ENSG00000174672	9024	HGNC:11405	rs4963076	T	C	0.0586	0.00807022	0.48171	11	1423176	3.835e-13	TRUE	0.00148915	52.7259
9790_28	35359	BR serine/threonine kinase 2	Serine/threonine-protein kinase BRSK2	BRSK2	Q8IWQ3	ENSG00000174672	9024	HGNC:11405	rs72849433	C	T	0.1754	0.0183546	0.05164	11	1399334	1.222e-21	TRUE	0.00257615	91.3203
9790_28	35359	BR serine/threonine kinase 2	Serine/threonine-protein kinase BRSK2	BRSK2	Q8IWQ3	ENSG00000174672	9024	HGNC:11405	rs7395006	C	T	0.0653	0.00853228	0.34838	11	1399428	1.959e-14	TRUE	0.00165387	58.5729
9790_28	35358	BR serine/threonine kinase 2	Serine/threonine-protein kinase BRSK2	BRSK2	Q8IWQ3	ENSG00000174672	9024	HGNC:11405	rs9651643	T	C	-0.0561	0.0081246	0.45527	11	1462217	5.022e-12	TRUE	0.00134671	47.6784
8989_40	35373	SCUB1	Signal peptide, CUB and EGF-like domain-containing protein 1	SCUBE1	Q8IWY4	ENSG00000159307	80274	HGNC:13441	rs10427744	A	G	-0.096	0.00947331	0.26549	22	43632938	3.914e-24	TRUE	0.0028949	102.693
8989_40	35373	SCUB1	Signal peptide, CUB and EGF-like domain-containing protein 1	SCUBE1	Q8IWY4	ENSG00000159307	80274	HGNC:13441	rs111975060	C	T	0.1213	0.0188994	0.05193	22	43585924	1.379e-10	TRUE	0.00116325	41.1932
8989_40	35370	SCUB1	Signal peptide, CUB and EGF-like domain-containing protein 1	SCUBE1	Q8IWY4	ENSG00000159307	80274	HGNC:13441	rs13053545	C	T	0.165	0.0118394	0.14475	22	43734266	3.802e-44	TRUE	0.00546157	194.226
8989_40	35373	SCUB1	Signal peptide, CUB and EGF-like domain-containing protein 1	SCUBE1	Q8IWY4	ENSG00000159307	80274	HGNC:13441	rs139012	G	A	-0.1107	0.0103309	0.79284	22	43623972	8.614e-27	TRUE	0.00323568	114.821
8989_40	35370	SCUB1	Signal peptide, CUB and EGF-like domain-containing protein 1	SCUBE1	Q8IWY4	ENSG00000159307	80274	HGNC:13441	rs139039	G	A	-0.1341	0.0175809	0.93858	22	43668169	2.392e-14	TRUE	0.00164229	58.18
8989_40	35373	SCUB1	Signal peptide, CUB and EGF-like domain-containing protein 1	SCUBE1	Q8IWY4	ENSG00000159307	80274	HGNC:13441	rs141712485	A	G	-0.1524	0.0274571	0.02278	22	43579006	2.849e-08	TRUE	0.000870231	30.8077
8989_40	35369	SCUB1	Signal peptide, CUB and EGF-like domain-containing protein 1	SCUBE1	Q8IWY4	ENSG00000159307	80274	HGNC:13441	rs2269668	G	T	0.0672	0.0119409	0.85509	22	43699774	1.826e-08	TRUE	0.000894703	31.6713
8989_40	35368	SCUB1	Signal peptide, CUB and EGF-like domain-containing protein 1	SCUBE1	Q8IWY4	ENSG00000159307	80274	HGNC:13441	rs5759269	T	C	-0.2438	0.0232274	0.03427	22	43697531	8.991e-26	TRUE	0.00310548	110.171
8989_40	35370	SCUB1	Signal peptide, CUB and EGF-like domain-containing protein 1	SCUBE1	Q8IWY4	ENSG00000159307	80274	HGNC:13441	rs6003130	T	C	-0.0747	0.0118648	0.14108	22	43662788	3.056e-10	TRUE	0.00111949	39.6385
8989_40	35371	SCUB1	Signal peptide, CUB and EGF-like domain-containing protein 1	SCUBE1	Q8IWY4	ENSG00000159307	80274	HGNC:13441	rs6003189	T	C	0.2118	0.0282881	0.02204	22	43809547	7.034e-14	TRUE	0.00158246	56.0587
8989_40	35373	SCUB1	Signal peptide, CUB and EGF-like domain-containing protein 1	SCUBE1	Q8IWY4	ENSG00000159307	80274	HGNC:13441	rs6003207	C	T	-0.0775	0.0122967	0.86661	22	43849419	2.929e-10	TRUE	0.00112173	39.7214
8989_40	35369	SCUB1	Signal peptide, CUB and EGF-like domain-containing protein 1	SCUBE1	Q8IWY4	ENSG00000159307	80274	HGNC:13441	rs6006451	T	C	0.054	0.00968163	0.74749	22	44292971	2.439e-08	TRUE	0.000878841	31.1093
8989_40	35371	SCUB1	Signal peptide, CUB and EGF-like domain-containing protein 1	SCUBE1	Q8IWY4	ENSG00000159307	80274	HGNC:13441	rs695786	T	C	-0.1182	0.00838361	0.50991	22	43769443	3.855e-45	TRUE	0.00558877	198.78
8989_40	35373	SCUB1	Signal peptide, CUB and EGF-like domain-containing protein 1	SCUBE1	Q8IWY4	ENSG00000159307	80274	HGNC:13441	rs73163950	A	G	-0.1007	0.0177884	0.05787	22	43613300	1.505e-08	TRUE	0.0009052	32.0468
8989_40	35371	SCUB1	Signal peptide, CUB and EGF-like domain-containing protein 1	SCUBE1	Q8IWY4	ENSG00000159307	80274	HGNC:13441	rs736029	A	T	-0.0913	0.014841	0.08702	22	43784094	7.658e-10	TRUE	0.00106887	37.8454
8989_40	35371	SCUB1	Signal peptide, CUB and EGF-like domain-containing protein 1	SCUBE1	Q8IWY4	ENSG00000159307	80274	HGNC:13441	rs74843774	C	T	-0.1377	0.0129695	0.11813	22	43765399	2.478e-26	TRUE	0.003177	112.726
8989_40	35373	SCUB1	Signal peptide, CUB and EGF-like domain-containing protein 1	SCUBE1	Q8IWY4	ENSG00000159307	80274	HGNC:13441	rs79564131	C	G	-0.1291	0.0225603	0.03498	22	44371007	1.05e-08	TRUE	0.000924942	32.7464
17836_17	35361	S100A16	Protein S100-A16	S100A16	Q96FQ6	ENSG00000188643	140576	HGNC:20441	rs114678888	A	C	-0.1969	0.017676	0.05647	1	153595448	8.067e-29	TRUE	0.00349705	124.086
17836_17	35362	S100A16	Protein S100-A16	S100A16	Q96FQ6	ENSG00000188643	140576	HGNC:20441	rs12044086	C	T	-0.1717	0.0271066	0.025	1	153242833	2.385e-10	TRUE	0.00113341	40.1227
17836_17	35363	S100A16	Protein S100-A16	S100A16	Q96FQ6	ENSG00000188643	140576	HGNC:20441	rs12070559	G	A	-0.105	0.0174331	0.0606	1	153743927	1.712e-09	TRUE	0.00102484	36.2767
17836_17	35363	S100A16	Protein S100-A16	S100A16	Q96FQ6	ENSG00000188643	140576	HGNC:20441	rs137958065	A	G	-0.0982	0.0170752	0.05823	1	153708984	8.87e-09	TRUE	0.000934461	33.0744
17836_17	35361	S100A16	Protein S100-A16	S100A16	Q96FQ6	ENSG00000188643	140576	HGNC:20441	rs28857273	A	C	0.1439	0.0134866	0.10158	1	153560040	1.408e-26	TRUE	0.0032094	113.846
17836_17	35360	S100A16	Protein S100-A16	S100A16	Q96FQ6	ENSG00000188643	140576	HGNC:20441	rs3014875	A	G	-0.0484	0.00863546	0.34949	1	153338751	2.085e-08	TRUE	0.000887659	31.4137
17836_17	35361	S100A16	Protein S100-A16	S100A16	Q96FQ6	ENSG00000188643	140576	HGNC:20441	rs41265183	T	C	0.0894	0.0141257	0.09451	1	153602553	2.469e-10	TRUE	0.00113153	40.0551
17836_17	35363	S100A16	Protein S100-A16	S100A16	Q96FQ6	ENSG00000188643	140576	HGNC:20441	rs55953243	A	G	0.1693	0.0220643	0.03594	1	153738899	1.68e-14	TRUE	0.00166221	58.8752
17836_17	35362	S100A16	Protein S100-A16	S100A16	Q96FQ6	ENSG00000188643	140576	HGNC:20441	rs7524035	T	C	-0.0754	0.0126181	0.11808	1	153485794	2.293e-09	TRUE	0.0010088	35.7073
17836_17	35364	S100A16	Protein S100-A16	S100A16	Q96FQ6	ENSG00000188643	140576	HGNC:20441	rs7532974	A	G	-0.0479	0.00827136	0.45066	1	153759738	6.994e-09	TRUE	0.000947478	33.5365
17836_17	35364	S100A16	Protein S100-A16	S100A16	Q96FQ6	ENSG00000188643	140576	HGNC:20441	rs7536152	G	A	-0.051	0.00864038	0.6402	1	154423909	3.58e-09	TRUE	0.00098426	34.8397
17836_17	35360	S100A16	Protein S100-A16	S100A16	Q96FQ6	ENSG00000188643	140576	HGNC:20441	rs75742937	G	A	-0.1502	0.0242752	0.02996	1	152830033	6.117e-10	TRUE	0.00108158	38.2837
17836_17	35361	S100A16	Protein S100-A16	S100A16	Q96FQ6	ENSG00000188643	140576	HGNC:20441	rs76459982	G	A	0.2021	0.0291302	0.019	1	153567363	3.982e-12	TRUE	0.00135942	48.1333
17836_17	35364	S100A16	Protein S100-A16	S100A16	Q96FQ6	ENSG00000188643	140576	HGNC:20441	rs78594767	A	G	-0.1515	0.0271334	0.02341	1	154355304	2.357e-08	TRUE	0.000880839	31.1757
17836_17	35362	S100A16	Protein S100-A16	S100A16	Q96FQ6	ENSG00000188643	140576	HGNC:20441	rs80076001	C	A	-0.1208	0.017944	0.05717	1	153498377	1.673e-11	TRUE	0.00128004	45.3204
17836_17	35362	S100A16	Protein S100-A16	S100A16	Q96FQ6	ENSG00000188643	140576	HGNC:20441	rs9726753	A	G	0.1865	0.00828475	0.43164	1	153591652	3.221e-112	TRUE	0.0141289	506.756
9076_25	35363	PENK	Proenkephalin-A	PENK	P01210	ENSG00000181195	5179	HGNC:8831	rs1015316	A	G	0.2163	0.0111199	0.15687	8	57427588	2.824e-84	TRUE	0.0105868	378.365
9076_25	35364	PENK	Proenkephalin-A	PENK	P01210	ENSG00000181195	5179	HGNC:8831	rs111262575	T	C	-0.3367	0.0254848	0.02527	8	57480180	7.5e-40	TRUE	0.0049119	174.552
9076_25	35359	PENK	Proenkephalin-A	PENK	P01210	ENSG00000181195	5179	HGNC:8831	rs111341288	A	G	-0.1452	0.0169409	0.0616	8	56543779	1.026e-17	TRUE	0.00207341	73.4619
9076_25	35363	PENK	Proenkephalin-A	PENK	P01210	ENSG00000181195	5179	HGNC:8831	rs111444806	G	C	0.1118	0.0181999	0.05247	8	58341703	8.104e-10	TRUE	0.001066	37.7349
9076_25	35358	PENK	Proenkephalin-A	PENK	P01210	ENSG00000181195	5179	HGNC:8831	rs112510182	C	T	0.3055	0.0198076	0.04447	8	56624861	1.14e-53	TRUE	0.00668318	237.88
9076_25	35364	PENK	Proenkephalin-A	PENK	P01210	ENSG00000181195	5179	HGNC:8831	rs112747675	A	G	-0.2555	0.025936	0.02545	8	57917310	6.774e-23	TRUE	0.00273684	97.0459
9076_25	35367	PENK	Proenkephalin-A	PENK	P01210	ENSG00000181195	5179	HGNC:8831	rs112760801	A	G	-0.1576	0.0157048	0.07266	8	57626580	1.068e-23	TRUE	0.00283948	100.704
9076_25	35360	PENK	Proenkephalin-A	PENK	P01210	ENSG00000181195	5179	HGNC:8831	rs113008607	A	C	-0.227	0.0174079	0.05774	8	57303085	7.241e-39	TRUE	0.00478616	170.043
9076_25	35359	PENK	Proenkephalin-A	PENK	P01210	ENSG00000181195	5179	HGNC:8831	rs113744929	T	C	0.1031	0.0159536	0.07014	8	56457653	1.03e-10	TRUE	0.00117981	41.7637
9076_25	35357	PENK	Proenkephalin-A	PENK	P01210	ENSG00000181195	5179	HGNC:8831	rs116914506	T	A	-0.2261	0.023542	0.0299	8	56384249	7.683e-22	TRUE	0.00260214	92.2386
9076_25	35360	PENK	Proenkephalin-A	PENK	P01210	ENSG00000181195	5179	HGNC:8831	rs116962581	G	A	-0.1892	0.0291176	0.01931	8	56977414	8.151e-11	TRUE	0.00119268	42.2212
9076_25	35364	PENK	Proenkephalin-A	PENK	P01210	ENSG00000181195	5179	HGNC:8831	rs117021828	T	C	0.2771	0.0200039	0.04255	8	57847872	1.232e-43	TRUE	0.00539705	191.886
9076_25	35360	PENK	Proenkephalin-A	PENK	P01210	ENSG00000181195	5179	HGNC:8831	rs117045227	T	G	0.1651	0.0282836	0.02147	8	57150868	5.305e-09	TRUE	0.000962764	34.0742
9076_25	35359	PENK	Proenkephalin-A	PENK	P01210	ENSG00000181195	5179	HGNC:8831	rs117141567	C	G	0.31	0.0395655	0.01049	8	56582869	4.684e-15	TRUE	0.00173325	61.3891
9076_25	35362	PENK	Proenkephalin-A	PENK	P01210	ENSG00000181195	5179	HGNC:8831	rs117526912	A	G	0.1997	0.0204619	0.03982	8	57682065	1.678e-22	TRUE	0.00268648	95.25
9076_25	35366	PENK	Proenkephalin-A	PENK	P01210	ENSG00000181195	5179	HGNC:8831	rs11776610	A	T	0.1116	0.0107109	0.17323	8	57635623	2.024e-25	TRUE	0.00306046	108.562
9076_25	35364	PENK	Proenkephalin-A	PENK	P01210	ENSG00000181195	5179	HGNC:8831	rs11780790	G	A	-0.1076	0.0193229	0.04744	8	58028279	2.569e-08	TRUE	0.00087612	31.0085
9076_25	35364	PENK	Proenkephalin-A	PENK	P01210	ENSG00000181195	5179	HGNC:8831	rs11785913	C	A	0.2384	0.016698	0.06271	8	57838106	3.036e-46	TRUE	0.00573129	203.838
9076_25	35360	PENK	Proenkephalin-A	PENK	P01210	ENSG00000181195	5179	HGNC:8831	rs117862661	T	C	0.2255	0.0320977	0.01534	8	57288045	2.134e-12	TRUE	0.00139397	49.3567
9076_25	35364	PENK	Proenkephalin-A	PENK	P01210	ENSG00000181195	5179	HGNC:8831	rs117988568	G	A	0.1557	0.017999	0.05456	8	58080387	5.129e-18	TRUE	0.00211166	74.8305
9076_25	35364	PENK	Proenkephalin-A	PENK	P01210	ENSG00000181195	5179	HGNC:8831	rs11985431	G	T	0.1797	0.0249759	0.02672	8	57904963	6.249e-13	TRUE	0.00146178	51.7671
9076_25	35364	PENK	Proenkephalin-A	PENK	P01210	ENSG00000181195	5179	HGNC:8831	rs11991623	C	A	-0.0791	0.0129793	0.10912	8	57822303	1.099e-09	TRUE	0.0010492	37.1408
9076_25	35361	PENK	Proenkephalin-A	PENK	P01210	ENSG00000181195	5179	HGNC:8831	rs12541193	G	T	-0.0703	0.00866404	0.67276	8	57438175	4.898e-16	TRUE	0.0018585	65.837
9076_25	35360	PENK	Proenkephalin-A	PENK	P01210	ENSG00000181195	5179	HGNC:8831	rs13249338	G	A	0.0961	0.00814254	0.5467	8	56847170	3.802e-32	TRUE	0.00392402	139.292
9076_25	35363	PENK	Proenkephalin-A	PENK	P01210	ENSG00000181195	5179	HGNC:8831	rs13258952	T	C	0.1198	0.0191798	0.0465	8	57897420	4.207e-10	TRUE	0.0011021	39.0144
9076_25	35360	PENK	Proenkephalin-A	PENK	P01210	ENSG00000181195	5179	HGNC:8831	rs13261947	T	C	0.186	0.0161988	0.06824	8	57145531	1.618e-30	TRUE	0.003715	131.845
9076_25	35360	PENK	Proenkephalin-A	PENK	P01210	ENSG00000181195	5179	HGNC:8831	rs13263968	C	T	0.3136	0.0100528	0.20025	8	57221079	1e-200	TRUE	0.0267854	973.145
9076_25	35363	PENK	Proenkephalin-A	PENK	P01210	ENSG00000181195	5179	HGNC:8831	rs138176561	A	G	-0.2576	0.0330542	0.01556	8	57546548	6.53e-15	TRUE	0.00171462	60.735
9076_25	35360	PENK	Proenkephalin-A	PENK	P01210	ENSG00000181195	5179	HGNC:8831	rs138547082	T	C	0.1178	0.0188321	0.0482	8	56961313	3.968e-10	TRUE	0.00110542	39.1285
9076_25	35363	PENK	Proenkephalin-A	PENK	P01210	ENSG00000181195	5179	HGNC:8831	rs139520669	A	G	-0.2546	0.0181335	0.05221	8	57893736	8.835e-45	TRUE	0.00554387	197.13
9076_25	35365	PENK	Proenkephalin-A	PENK	P01210	ENSG00000181195	5179	HGNC:8831	rs1396128	T	C	0.0782	0.00878188	0.30956	8	57793857	5.353e-19	TRUE	0.00223726	79.2937
9076_25	35360	PENK	Proenkephalin-A	PENK	P01210	ENSG00000181195	5179	HGNC:8831	rs141277904	T	C	-0.2429	0.0359781	0.01288	8	56654581	1.465e-11	TRUE	0.00128745	45.5804
9076_25	35365	PENK	Proenkephalin-A	PENK	P01210	ENSG00000181195	5179	HGNC:8831	rs141680889	T	C	-0.2674	0.0297796	0.01874	8	57792331	2.725e-19	TRUE	0.00227482	80.6278
9076_25	35360	PENK	Proenkephalin-A	PENK	P01210	ENSG00000181195	5179	HGNC:8831	rs143113777	G	T	0.2012	0.0366682	0.01262	8	57160308	4.087e-08	TRUE	0.000850787	30.1077
9076_25	35360	PENK	Proenkephalin-A	PENK	P01210	ENSG00000181195	5179	HGNC:8831	rs143680928	A	G	-0.2291	0.041025	0.0104	8	56737562	2.345e-08	TRUE	0.000881218	31.1856
9076_25	35365	PENK	Proenkephalin-A	PENK	P01210	ENSG00000181195	5179	HGNC:8831	rs144377961	T	G	-0.2164	0.03627	0.01319	8	57778236	2.426e-09	TRUE	0.00100562	35.5975
9076_25	35360	PENK	Proenkephalin-A	PENK	P01210	ENSG00000181195	5179	HGNC:8831	rs145255274	C	T	-0.3404	0.0219394	0.03414	8	57291527	2.726e-54	TRUE	0.00676232	240.73
9076_25	35359	PENK	Proenkephalin-A	PENK	P01210	ENSG00000181195	5179	HGNC:8831	rs1470708	G	A	-0.1251	0.00823327	0.41739	8	56816710	3.849e-52	TRUE	0.00648736	230.871
9076_25	35364	PENK	Proenkephalin-A	PENK	P01210	ENSG00000181195	5179	HGNC:8831	rs147827967	T	C	-0.2839	0.0265008	0.02421	8	57981496	8.856e-27	TRUE	0.00323496	114.766
9076_25	35360	PENK	Proenkephalin-A	PENK	P01210	ENSG00000181195	5179	HGNC:8831	rs148685873	A	G	-0.1831	0.0222378	0.036	8	56992800	1.815e-16	TRUE	0.00191369	67.794
9076_25	35359	PENK	Proenkephalin-A	PENK	P01210	ENSG00000181195	5179	HGNC:8831	rs150218946	G	A	-0.1612	0.0230039	0.03146	8	56582083	2.426e-12	TRUE	0.00138691	49.1052
9076_25	35359	PENK	Proenkephalin-A	PENK	P01210	ENSG00000181195	5179	HGNC:8831	rs150321118	A	G	-0.185	0.0201066	0.04305	8	56480981	3.547e-20	TRUE	0.00238866	84.658
9076_25	35367	PENK	Proenkephalin-A	PENK	P01210	ENSG00000181195	5179	HGNC:8831	rs16920917	G	A	0.4147	0.0346577	0.01422	8	57609009	5.381e-33	TRUE	0.00403218	143.175
9076_25	35358	PENK	Proenkephalin-A	PENK	P01210	ENSG00000181195	5179	HGNC:8831	rs16921969	C	T	-0.1009	0.0155975	0.07228	8	56439158	9.865e-11	TRUE	0.00118222	41.848
9076_25	35360	PENK	Proenkephalin-A	PENK	P01210	ENSG00000181195	5179	HGNC:8831	rs16922237	T	C	0.0933	0.0116424	0.13954	8	56696595	1.112e-15	TRUE	0.00181302	64.2213
9076_25	35360	PENK	Proenkephalin-A	PENK	P01210	ENSG00000181195	5179	HGNC:8831	rs181210891	T	C	0.3626	0.0410602	0.01047	8	57042810	1.038e-18	TRUE	0.00220074	77.9855
9076_25	35358	PENK	Proenkephalin-A	PENK	P01210	ENSG00000181195	5179	HGNC:8831	rs181978437	G	A	-0.1818	0.029769	0.01794	8	56445108	1.015e-09	TRUE	0.00105375	37.2959
9076_25	35363	PENK	Proenkephalin-A	PENK	P01210	ENSG00000181195	5179	HGNC:8831	rs186762205	G	A	0.2463	0.0276559	0.0219	8	57410201	5.297e-19	TRUE	0.00223797	79.3145
9076_25	35360	PENK	Proenkephalin-A	PENK	P01210	ENSG00000181195	5179	HGNC:8831	rs187519567	C	A	-0.2109	0.0224574	0.03397	8	56948364	5.936e-21	TRUE	0.00248809	88.1933
9076_25	35358	PENK	Proenkephalin-A	PENK	P01210	ENSG00000181195	5179	HGNC:8831	rs1876236	T	A	0.0611	0.00879419	0.31303	8	56403134	3.711e-12	TRUE	0.00136344	48.2715
9076_25	35360	PENK	Proenkephalin-A	PENK	P01210	ENSG00000181195	5179	HGNC:8831	rs189324443	G	C	-0.2071	0.0357798	0.01368	8	57283336	7.115e-09	TRUE	0.000946643	33.5031
9076_25	35362	PENK	Proenkephalin-A	PENK	P01210	ENSG00000181195	5179	HGNC:8831	rs1895636	G	T	-0.1066	0.00815801	0.5328	8	57718215	5.089e-39	TRUE	0.00480553	170.744
9076_25	35359	PENK	Proenkephalin-A	PENK	P01210	ENSG00000181195	5179	HGNC:8831	rs189982672	C	T	-0.0914	0.016138	0.07115	8	56576231	1.482e-08	TRUE	0.000906403	32.0768
9076_25	35361	PENK	Proenkephalin-A	PENK	P01210	ENSG00000181195	5179	HGNC:8831	rs192753046	A	G	0.183	0.0331267	0.01488	8	57342805	3.309e-08	TRUE	0.000862326	30.5173
9076_25	35360	PENK	Proenkephalin-A	PENK	P01210	ENSG00000181195	5179	HGNC:8831	rs1963650	C	T	-0.0869	0.00816867	0.44215	8	56814809	1.979e-26	TRUE	0.00319052	113.171
9076_25	35359	PENK	Proenkephalin-A	PENK	P01210	ENSG00000181195	5179	HGNC:8831	rs2036898	C	G	-0.1309	0.0107917	0.82779	8	56885098	7.352e-34	TRUE	0.00414401	147.13
9076_25	35362	PENK	Proenkephalin-A	PENK	P01210	ENSG00000181195	5179	HGNC:8831	rs2165368	G	C	-0.1952	0.00994673	0.20979	8	57520789	9.542e-86	TRUE	0.0107741	385.123
9076_25	35362	PENK	Proenkephalin-A	PENK	P01210	ENSG00000181195	5179	HGNC:8831	rs2576576	A	G	-0.4014	0.0106181	0.29949	8	57361599	1e-200	TRUE	0.0388456	1429.1
9076_25	35364	PENK	Proenkephalin-A	PENK	P01210	ENSG00000181195	5179	HGNC:8831	rs2610023	T	C	-0.2342	0.0086953	0.688	8	57479172	8.765e-160	TRUE	0.0201024	725.445
9076_25	35363	PENK	Proenkephalin-A	PENK	P01210	ENSG00000181195	5179	HGNC:8831	rs2610042	G	A	-0.3985	0.0211724	0.96183	8	57421947	5.019e-79	TRUE	0.00991886	354.255
9076_25	35362	PENK	Proenkephalin-A	PENK	P01210	ENSG00000181195	5179	HGNC:8831	rs353756	C	G	0.3162	0.033471	0.01567	8	57670286	3.487e-21	TRUE	0.00251756	89.2457
9076_25	35364	PENK	Proenkephalin-A	PENK	P01210	ENSG00000181195	5179	HGNC:8831	rs35775010	C	T	-0.1373	0.0121296	0.12787	8	57836896	1.052e-29	TRUE	0.00361026	128.129
9076_25	35367	PENK	Proenkephalin-A	PENK	P01210	ENSG00000181195	5179	HGNC:8831	rs36029104	A	C	-0.1218	0.0168852	0.06082	8	57619123	5.456e-13	TRUE	0.00146917	52.0336
9076_25	35360	PENK	Proenkephalin-A	PENK	P01210	ENSG00000181195	5179	HGNC:8831	rs4641033	T	C	-0.1542	0.0217325	0.03686	8	56995675	1.29e-12	TRUE	0.00142182	50.3444
9076_25	35361	PENK	Proenkephalin-A	PENK	P01210	ENSG00000181195	5179	HGNC:8831	rs4737438	A	G	0.2805	0.00824833	0.37983	8	57438048	1e-200	TRUE	0.0316706	1156.47
9076_25	35359	PENK	Proenkephalin-A	PENK	P01210	ENSG00000181195	5179	HGNC:8831	rs4738287	A	G	-0.1171	0.011521	0.85461	8	56499526	2.869e-24	TRUE	0.00291334	103.308
9076_25	35362	PENK	Proenkephalin-A	PENK	P01210	ENSG00000181195	5179	HGNC:8831	rs55872292	T	C	-0.1239	0.0100201	0.20724	8	57696305	4.033e-35	TRUE	0.00430541	152.898
9076_25	35360	PENK	Proenkephalin-A	PENK	P01210	ENSG00000181195	5179	HGNC:8831	rs55985728	A	C	0.1733	0.0202677	0.04193	8	57030028	1.225e-17	TRUE	0.0020635	73.112
9076_25	35360	PENK	Proenkephalin-A	PENK	P01210	ENSG00000181195	5179	HGNC:8831	rs61322716	A	G	-0.2024	0.0232784	0.03114	8	57012275	3.476e-18	TRUE	0.00213353	75.5986
9076_25	35360	PENK	Proenkephalin-A	PENK	P01210	ENSG00000181195	5179	HGNC:8831	rs62515397	A	G	-0.1534	0.0128163	0.11274	8	56972715	5.159e-33	TRUE	0.00403533	143.259
9076_25	35360	PENK	Proenkephalin-A	PENK	P01210	ENSG00000181195	5179	HGNC:8831	rs62515403	A	G	0.2071	0.0209365	0.03792	8	57030760	4.517e-23	TRUE	0.00275972	97.8483
9076_25	35359	PENK	Proenkephalin-A	PENK	P01210	ENSG00000181195	5179	HGNC:8831	rs62517979	T	C	-0.1278	0.0162024	0.06583	8	56539216	3.078e-15	TRUE	0.00175656	62.2159
9076_25	35360	PENK	Proenkephalin-A	PENK	P01210	ENSG00000181195	5179	HGNC:8831	rs6474050	C	T	-0.2218	0.0127697	0.88825	8	57117095	1.412e-67	TRUE	0.00846022	301.689
9076_25	35364	PENK	Proenkephalin-A	PENK	P01210	ENSG00000181195	5179	HGNC:8831	rs6651357	A	C	-0.3659	0.00967903	0.28073	8	57498704	1e-200	TRUE	0.0388435	1429.1
9076_25	35363	PENK	Proenkephalin-A	PENK	P01210	ENSG00000181195	5179	HGNC:8831	rs6988870	C	G	0.0713	0.0106394	0.17772	8	58343134	2.063e-11	TRUE	0.00126843	44.91
9076_25	35359	PENK	Proenkephalin-A	PENK	P01210	ENSG00000181195	5179	HGNC:8831	rs71519428	C	T	0.0878	0.012187	0.12812	8	56578218	5.83e-13	TRUE	0.00146583	51.9034
9076_25	35363	PENK	Proenkephalin-A	PENK	P01210	ENSG00000181195	5179	HGNC:8831	rs71519459	C	T	-0.1994	0.011124	0.15856	8	57437081	7.503e-72	TRUE	0.00900478	321.311
9076_25	35365	PENK	Proenkephalin-A	PENK	P01210	ENSG00000181195	5179	HGNC:8831	rs72647018	T	C	-0.235	0.0345352	0.01478	8	57783358	1.013e-11	TRUE	0.00130766	46.3032
9076_25	35360	PENK	Proenkephalin-A	PENK	P01210	ENSG00000181195	5179	HGNC:8831	rs72651438	A	G	0.2133	0.0182184	0.05076	8	56708933	1.161e-31	TRUE	0.00386181	137.075
9076_25	35363	PENK	Proenkephalin-A	PENK	P01210	ENSG00000181195	5179	HGNC:8831	rs72661032	T	C	0.2522	0.0206153	0.03944	8	57553811	2.055e-34	TRUE	0.00421457	149.662
9076_25	35367	PENK	Proenkephalin-A	PENK	P01210	ENSG00000181195	5179	HGNC:8831	rs72661070	T	G	-0.1524	0.0145208	0.08304	8	57621627	9.082e-26	TRUE	0.00310501	110.151
9076_25	35360	PENK	Proenkephalin-A	PENK	P01210	ENSG00000181195	5179	HGNC:8831	rs74602571	C	T	0.3086	0.0366461	0.01205	8	56784948	3.73e-17	TRUE	0.00200161	70.9147
9076_25	35360	PENK	Proenkephalin-A	PENK	P01210	ENSG00000181195	5179	HGNC:8831	rs77489913	C	A	-0.2323	0.0217177	0.03685	8	57286474	1.059e-26	TRUE	0.00322536	114.411
9076_25	35362	PENK	Proenkephalin-A	PENK	P01210	ENSG00000181195	5179	HGNC:8831	rs77722907	A	G	0.1814	0.0112893	0.1539	8	57571936	4.258e-58	TRUE	0.00724881	258.189
9076_25	35359	PENK	Proenkephalin-A	PENK	P01210	ENSG00000181195	5179	HGNC:8831	rs7817145	C	G	-0.1011	0.00837728	0.38338	8	56484292	1.552e-33	TRUE	0.00410238	145.645
9076_25	35360	PENK	Proenkephalin-A	PENK	P01210	ENSG00000181195	5179	HGNC:8831	rs78329725	G	A	-0.2748	0.00939998	0.24417	8	57259146	7.153e-188	TRUE	0.0236004	854.632
9076_25	35362	PENK	Proenkephalin-A	PENK	P01210	ENSG00000181195	5179	HGNC:8831	rs78898231	T	C	0.3087	0.022917	0.03245	8	57700558	2.338e-41	TRUE	0.00510531	181.45
9076_25	35362	PENK	Proenkephalin-A	PENK	P01210	ENSG00000181195	5179	HGNC:8831	rs79201791	A	G	0.2866	0.0201883	0.0432	8	57656652	9.655e-46	TRUE	0.00566723	201.536
9076_25	35360	PENK	Proenkephalin-A	PENK	P01210	ENSG00000181195	5179	HGNC:8831	rs79325521	G	C	-0.3087	0.0191224	0.04742	8	57213545	1.264e-58	TRUE	0.00731666	260.609
9076_25	35363	PENK	Proenkephalin-A	PENK	P01210	ENSG00000181195	5179	HGNC:8831	rs80086625	C	T	-0.1873	0.0291044	0.02084	8	57640845	1.231e-10	TRUE	0.00116984	41.4151
9076_25	35364	PENK	Proenkephalin-A	PENK	P01210	ENSG00000181195	5179	HGNC:8831	rs894024	G	A	-0.2675	0.0239022	0.96937	8	57467997	4.492e-29	TRUE	0.00352937	125.248
3172_28	35352	ARSB	Arylsulfatase B	ARSB	P15848	ENSG00000113273	411	HGNC:714	rs10454897	T	C	-0.051	0.00783974	0.47107	5	78131336	7.753e-11	TRUE	0.00119572	42.3191
3172_28	35357	ARSB	Arylsulfatase B	ARSB	P15848	ENSG00000113273	411	HGNC:714	rs113715862	C	T	0.1425	0.0226467	0.02995	5	78142329	3.128e-10	TRUE	0.00111862	39.593
3172_28	35357	ARSB	Arylsulfatase B	ARSB	P15848	ENSG00000113273	411	HGNC:714	rs11743362	A	G	-0.1293	0.00778182	0.49507	5	78176721	5.369e-62	TRUE	0.00774829	276.08
3172_28	35351	ARSB	Arylsulfatase B	ARSB	P15848	ENSG00000113273	411	HGNC:714	rs2431330	G	A	-0.0479	0.00780735	0.53528	5	78347628	8.503e-10	TRUE	0.00106371	37.6412
3172_28	35357	ARSB	Arylsulfatase B	ARSB	P15848	ENSG00000113273	411	HGNC:714	rs338460	A	G	-0.053	0.00781547	0.52334	5	78216878	1.19e-11	TRUE	0.00129905	45.9877
3172_28	35351	ARSB	Arylsulfatase B	ARSB	P15848	ENSG00000113273	411	HGNC:714	rs672413	G	A	-0.1191	0.00891454	0.73543	5	78278229	1.033e-40	TRUE	0.00502413	178.495
3172_28	35351	ARSB	Arylsulfatase B	ARSB	P15848	ENSG00000113273	411	HGNC:714	rs7701762	T	G	0.1354	0.020918	0.03574	5	78283861	9.615e-11	TRUE	0.00118387	41.8982
6081_52	35364	PCOC2	Procollagen C-endopeptidase enhancer 2	PCOLCE2	Q9UKZ9	ENSG00000163710	26577	HGNC:8739	rs112139586	A	G	0.5468	0.0225239	0.03768	3	142546054	3.481e-130	TRUE	0.0163928	589.344
6081_52	35365	PCOC2	Procollagen C-endopeptidase enhancer 2	PCOLCE2	Q9UKZ9	ENSG00000163710	26577	HGNC:8739	rs112244617	G	T	0.3382	0.0289388	0.02317	3	142756450	1.49e-31	TRUE	0.00384737	136.58
6081_52	35365	PCOC2	Procollagen C-endopeptidase enhancer 2	PCOLCE2	Q9UKZ9	ENSG00000163710	26577	HGNC:8739	rs113464939	T	C	0.2972	0.036835	0.01347	3	142633172	7.122e-16	TRUE	0.0018375	65.0992
6081_52	35362	PCOC2	Procollagen C-endopeptidase enhancer 2	PCOLCE2	Q9UKZ9	ENSG00000163710	26577	HGNC:8739	rs113849369	C	G	0.1068	0.00964326	0.27608	3	141556977	1.657e-28	TRUE	0.00345684	122.658
6081_52	35365	PCOC2	Procollagen C-endopeptidase enhancer 2	PCOLCE2	Q9UKZ9	ENSG00000163710	26577	HGNC:8739	rs113856318	C	T	0.7375	0.0321432	0.01851	3	142635593	1.684e-116	TRUE	0.0146683	526.436
6081_52	35363	PCOC2	Procollagen C-endopeptidase enhancer 2	PCOLCE2	Q9UKZ9	ENSG00000163710	26577	HGNC:8739	rs114457875	A	G	-0.1661	0.029119	0.02154	3	141572636	1.169e-08	TRUE	0.000919313	32.5377
6081_52	35365	PCOC2	Procollagen C-endopeptidase enhancer 2	PCOLCE2	Q9UKZ9	ENSG00000163710	26577	HGNC:8739	rs114932071	T	A	0.3119	0.0382322	0.01264	3	141812245	3.405e-16	TRUE	0.00187848	66.5536
6081_52	35364	PCOC2	Procollagen C-endopeptidase enhancer 2	PCOLCE2	Q9UKZ9	ENSG00000163710	26577	HGNC:8739	rs115127732	G	T	0.1573	0.0241229	0.03227	3	142586556	6.995e-11	TRUE	0.00120099	42.5204
6081_52	35365	PCOC2	Procollagen C-endopeptidase enhancer 2	PCOLCE2	Q9UKZ9	ENSG00000163710	26577	HGNC:8739	rs115599304	A	G	0.1118	0.020042	0.04738	3	143183542	2.429e-08	TRUE	0.000879165	31.1173
6081_52	35365	PCOC2	Procollagen C-endopeptidase enhancer 2	PCOLCE2	Q9UKZ9	ENSG00000163710	26577	HGNC:8739	rs115713929	T	G	0.259	0.020949	0.04606	3	142641664	4.125e-35	TRUE	0.00430379	152.853
6081_52	35365	PCOC2	Procollagen C-endopeptidase enhancer 2	PCOLCE2	Q9UKZ9	ENSG00000163710	26577	HGNC:8739	rs116459600	T	C	0.396	0.0171348	0.06898	3	142653519	3.602e-118	TRUE	0.0148789	534.111
6081_52	35364	PCOC2	Procollagen C-endopeptidase enhancer 2	PCOLCE2	Q9UKZ9	ENSG00000163710	26577	HGNC:8739	rs11712986	C	T	-0.0619	0.0091156	0.3398	3	142547262	1.117e-11	TRUE	0.00130229	46.1117
6081_52	35365	PCOC2	Procollagen C-endopeptidase enhancer 2	PCOLCE2	Q9UKZ9	ENSG00000163710	26577	HGNC:8739	rs117500289	A	G	0.2936	0.0302467	0.02066	3	141547370	2.819e-22	TRUE	0.00265737	94.223
6081_52	35365	PCOC2	Procollagen C-endopeptidase enhancer 2	PCOLCE2	Q9UKZ9	ENSG00000163710	26577	HGNC:8739	rs11917601	C	G	-0.2706	0.0228396	0.03681	3	142642568	2.208e-32	TRUE	0.00395375	140.371
6081_52	35365	PCOC2	Procollagen C-endopeptidase enhancer 2	PCOLCE2	Q9UKZ9	ENSG00000163710	26577	HGNC:8739	rs12488097	G	T	0.065	0.00900915	0.34162	3	143200772	5.398e-13	TRUE	0.00146984	52.0546
6081_52	35365	PCOC2	Procollagen C-endopeptidase enhancer 2	PCOLCE2	Q9UKZ9	ENSG00000163710	26577	HGNC:8739	rs12629721	G	T	-0.477	0.0324728	0.01774	3	142661576	7.56e-49	TRUE	0.00606464	215.773
6081_52	35365	PCOC2	Procollagen C-endopeptidase enhancer 2	PCOLCE2	Q9UKZ9	ENSG00000163710	26577	HGNC:8739	rs13062963	C	G	-0.0677	0.00894608	0.35969	3	141992549	3.803e-14	TRUE	0.00161681	57.268
6081_52	35364	PCOC2	Procollagen C-endopeptidase enhancer 2	PCOLCE2	Q9UKZ9	ENSG00000163710	26577	HGNC:8739	rs13078152	A	T	-0.2005	0.0302187	0.02079	3	142586318	3.246e-11	TRUE	0.00124337	44.0226
6081_52	35364	PCOC2	Procollagen C-endopeptidase enhancer 2	PCOLCE2	Q9UKZ9	ENSG00000163710	26577	HGNC:8739	rs139893498	A	G	-0.2944	0.0371663	0.01314	3	142983271	2.353e-15	TRUE	0.00177121	62.7448
6081_52	35365	PCOC2	Procollagen C-endopeptidase enhancer 2	PCOLCE2	Q9UKZ9	ENSG00000163710	26577	HGNC:8739	rs144706956	C	A	-0.409	0.030132	0.01942	3	142455012	5.744e-42	TRUE	0.00518303	184.242
6081_52	35365	PCOC2	Procollagen C-endopeptidase enhancer 2	PCOLCE2	Q9UKZ9	ENSG00000163710	26577	HGNC:8739	rs145252632	A	C	0.1544	0.0270129	0.02677	3	141666963	1.092e-08	TRUE	0.000922999	32.6702
6081_52	35365	PCOC2	Procollagen C-endopeptidase enhancer 2	PCOLCE2	Q9UKZ9	ENSG00000163710	26577	HGNC:8739	rs145388610	T	G	0.2415	0.04222	0.01031	3	141611699	1.065e-08	TRUE	0.000924373	32.7188
6081_52	35365	PCOC2	Procollagen C-endopeptidase enhancer 2	PCOLCE2	Q9UKZ9	ENSG00000163710	26577	HGNC:8739	rs145791361	C	G	-0.1885	0.0228489	0.03565	3	142131378	1.586e-16	TRUE	0.00192091	68.0599
6081_52	35364	PCOC2	Procollagen C-endopeptidase enhancer 2	PCOLCE2	Q9UKZ9	ENSG00000163710	26577	HGNC:8739	rs148712440	A	G	-0.1562	0.0267648	0.02578	3	143150356	5.346e-09	TRUE	0.000962232	34.0592
6081_52	35365	PCOC2	Procollagen C-endopeptidase enhancer 2	PCOLCE2	Q9UKZ9	ENSG00000163710	26577	HGNC:8739	rs150863954	T	C	-0.2794	0.0269686	0.02544	3	142800913	3.762e-25	TRUE	0.00302601	107.334
6081_52	35364	PCOC2	Procollagen C-endopeptidase enhancer 2	PCOLCE2	Q9UKZ9	ENSG00000163710	26577	HGNC:8739	rs1530266	G	A	-0.0803	0.00974232	0.26888	3	142888606	1.688e-16	TRUE	0.0019175	67.937
6081_52	35364	PCOC2	Procollagen C-endopeptidase enhancer 2	PCOLCE2	Q9UKZ9	ENSG00000163710	26577	HGNC:8739	rs16853038	T	A	0.138	0.0136182	0.112	3	142856559	3.924e-24	TRUE	0.00289549	102.688
6081_52	35364	PCOC2	Procollagen C-endopeptidase enhancer 2	PCOLCE2	Q9UKZ9	ENSG00000163710	26577	HGNC:8739	rs16853866	G	T	-0.1216	0.0169685	0.06901	3	143305093	7.71e-13	TRUE	0.00145015	51.3546
6081_52	35364	PCOC2	Procollagen C-endopeptidase enhancer 2	PCOLCE2	Q9UKZ9	ENSG00000163710	26577	HGNC:8739	rs17635531	A	G	0.0802	0.0137495	0.10929	3	142966718	5.446e-09	TRUE	0.000961214	34.0232
6081_52	35365	PCOC2	Procollagen C-endopeptidase enhancer 2	PCOLCE2	Q9UKZ9	ENSG00000163710	26577	HGNC:8739	rs185111962	A	G	-0.2029	0.0329367	0.01779	3	142839977	7.261e-10	TRUE	0.00107198	37.9492
6081_52	35364	PCOC2	Procollagen C-endopeptidase enhancer 2	PCOLCE2	Q9UKZ9	ENSG00000163710	26577	HGNC:8739	rs1868182	T	C	0.3026	0.0358275	0.01445	3	143526787	3.014e-17	TRUE	0.00201322	71.3353
6081_52	35365	PCOC2	Procollagen C-endopeptidase enhancer 2	PCOLCE2	Q9UKZ9	ENSG00000163710	26577	HGNC:8739	rs187151736	A	G	0.3959	0.0218902	0.03971	3	141664199	4.13e-73	TRUE	0.00916481	327.093
6081_52	35364	PCOC2	Procollagen C-endopeptidase enhancer 2	PCOLCE2	Q9UKZ9	ENSG00000163710	26577	HGNC:8739	rs1978913	G	A	-0.0527	0.00865889	0.57636	3	143319295	1.156e-09	TRUE	0.00104642	37.0422
6081_52	35360	PCOC2	Procollagen C-endopeptidase enhancer 2	PCOLCE2	Q9UKZ9	ENSG00000163710	26577	HGNC:8739	rs2352726	A	C	0.0729	0.0117239	0.16319	3	143019221	5.033e-10	TRUE	0.00109232	38.6644
6081_52	35364	PCOC2	Procollagen C-endopeptidase enhancer 2	PCOLCE2	Q9UKZ9	ENSG00000163710	26577	HGNC:8739	rs2707990	A	G	-0.0884	0.0126063	0.13345	3	142577944	2.343e-12	TRUE	0.00138864	49.1735
6081_52	35365	PCOC2	Procollagen C-endopeptidase enhancer 2	PCOLCE2	Q9UKZ9	ENSG00000163710	26577	HGNC:8739	rs28463227	A	G	-0.1119	0.0104905	0.21321	3	141582170	1.456e-26	TRUE	0.00320717	113.78
6081_52	35363	PCOC2	Procollagen C-endopeptidase enhancer 2	PCOLCE2	Q9UKZ9	ENSG00000163710	26577	HGNC:8739	rs2901939	C	G	0.0916	0.0103697	0.78245	3	141563341	1.015e-18	TRUE	0.0022018	78.0298
6081_52	35365	PCOC2	Procollagen C-endopeptidase enhancer 2	PCOLCE2	Q9UKZ9	ENSG00000163710	26577	HGNC:8739	rs35559684	C	T	-0.131	0.0162966	0.07399	3	142672926	9.095e-16	TRUE	0.00182393	64.6174
6081_52	35365	PCOC2	Procollagen C-endopeptidase enhancer 2	PCOLCE2	Q9UKZ9	ENSG00000163710	26577	HGNC:8739	rs35624474	A	G	-0.137	0.0130722	0.12013	3	141878153	1.065e-25	TRUE	0.00309631	109.835
6081_52	35365	PCOC2	Procollagen C-endopeptidase enhancer 2	PCOLCE2	Q9UKZ9	ENSG00000163710	26577	HGNC:8739	rs36293	C	A	0.1635	0.00875936	0.38353	3	142676433	9.405e-78	TRUE	0.00975627	348.41
6081_52	35364	PCOC2	Procollagen C-endopeptidase enhancer 2	PCOLCE2	Q9UKZ9	ENSG00000163710	26577	HGNC:8739	rs3816690	C	T	0.1488	0.0179262	0.06121	3	142567030	1.035e-16	TRUE	0.00194468	68.9016
6081_52	35364	PCOC2	Procollagen C-endopeptidase enhancer 2	PCOLCE2	Q9UKZ9	ENSG00000163710	26577	HGNC:8739	rs4234479	T	C	0.0585	0.00882702	0.37785	3	142879471	3.417e-11	TRUE	0.00124053	43.9221
6081_52	35365	PCOC2	Procollagen C-endopeptidase enhancer 2	PCOLCE2	Q9UKZ9	ENSG00000163710	26577	HGNC:8739	rs4582075	A	T	-0.0789	0.00867275	0.41596	3	142193545	9.247e-20	TRUE	0.00233494	82.7638
6081_52	35365	PCOC2	Procollagen C-endopeptidase enhancer 2	PCOLCE2	Q9UKZ9	ENSG00000163710	26577	HGNC:8739	rs4683441	G	A	0.1101	0.00858302	0.54315	3	142710064	1.148e-37	TRUE	0.00463157	164.548
6081_52	35364	PCOC2	Procollagen C-endopeptidase enhancer 2	PCOLCE2	Q9UKZ9	ENSG00000163710	26577	HGNC:8739	rs4683636	A	G	0.0578	0.00921891	0.31267	3	141587562	3.617e-10	TRUE	0.00111039	39.3094
6081_52	35364	PCOC2	Procollagen C-endopeptidase enhancer 2	PCOLCE2	Q9UKZ9	ENSG00000163710	26577	HGNC:8739	rs555540347	T	G	-0.2454	0.038531	0.01262	3	143169166	1.904e-10	TRUE	0.00114576	40.5628
6081_52	35364	PCOC2	Procollagen C-endopeptidase enhancer 2	PCOLCE2	Q9UKZ9	ENSG00000163710	26577	HGNC:8739	rs55733124	A	T	-0.1978	0.0253317	0.02845	3	142596476	5.792e-15	TRUE	0.00172123	60.9711
6081_52	35364	PCOC2	Procollagen C-endopeptidase enhancer 2	PCOLCE2	Q9UKZ9	ENSG00000163710	26577	HGNC:8739	rs56359833	T	A	0.0495	0.00888345	0.3715	3	143262378	2.516e-08	TRUE	0.000877262	31.049
6081_52	35364	PCOC2	Procollagen C-endopeptidase enhancer 2	PCOLCE2	Q9UKZ9	ENSG00000163710	26577	HGNC:8739	rs57747891	G	A	-0.1387	0.0230656	0.03642	3	142888659	1.818e-09	TRUE	0.00102151	36.1596
6081_52	35365	PCOC2	Procollagen C-endopeptidase enhancer 2	PCOLCE2	Q9UKZ9	ENSG00000163710	26577	HGNC:8739	rs59782091	C	T	-0.0596	0.0101022	0.23248	3	143092258	3.642e-09	TRUE	0.000983289	34.8063
6081_52	35366	PCOC2	Procollagen C-endopeptidase enhancer 2	PCOLCE2	Q9UKZ9	ENSG00000163710	26577	HGNC:8739	rs6778085	T	C	-0.1035	0.0103846	0.78085	3	141756869	2.133e-23	TRUE	0.00280104	99.3341
6081_52	35365	PCOC2	Procollagen C-endopeptidase enhancer 2	PCOLCE2	Q9UKZ9	ENSG00000163710	26577	HGNC:8739	rs6794287	T	C	0.4465	0.0118111	0.37095	3	142602666	1e-200	TRUE	0.0388425	1429.1
6081_52	35362	PCOC2	Procollagen C-endopeptidase enhancer 2	PCOLCE2	Q9UKZ9	ENSG00000163710	26577	HGNC:8739	rs6801468	T	C	-0.1334	0.0173804	0.06604	3	142996200	1.65e-14	TRUE	0.00166325	58.9106
6081_52	35363	PCOC2	Procollagen C-endopeptidase enhancer 2	PCOLCE2	Q9UKZ9	ENSG00000163710	26577	HGNC:8739	rs72998474	T	C	0.0863	0.015429	0.08247	3	142893570	2.227e-08	TRUE	0.000883973	31.2858
6081_52	35365	PCOC2	Procollagen C-endopeptidase enhancer 2	PCOLCE2	Q9UKZ9	ENSG00000163710	26577	HGNC:8739	rs73157687	C	T	-0.1552	0.0193045	0.05236	3	142743124	9.016e-16	TRUE	0.00182441	64.6346
6081_52	35364	PCOC2	Procollagen C-endopeptidase enhancer 2	PCOLCE2	Q9UKZ9	ENSG00000163710	26577	HGNC:8739	rs73159664	G	A	0.17	0.0191552	0.05247	3	142909535	7.002e-19	TRUE	0.00222239	78.7632
6081_52	35365	PCOC2	Procollagen C-endopeptidase enhancer 2	PCOLCE2	Q9UKZ9	ENSG00000163710	26577	HGNC:8739	rs73232689	C	A	-0.4962	0.0335129	0.0165	3	141799791	1.335e-49	TRUE	0.00616108	219.225
6081_52	35365	PCOC2	Procollagen C-endopeptidase enhancer 2	PCOLCE2	Q9UKZ9	ENSG00000163710	26577	HGNC:8739	rs73232710	A	G	-0.1751	0.0265426	0.02677	3	142513504	4.197e-11	TRUE	0.00122915	43.5198
6081_52	35365	PCOC2	Procollagen C-endopeptidase enhancer 2	PCOLCE2	Q9UKZ9	ENSG00000163710	26577	HGNC:8739	rs73238177	C	T	-0.1236	0.0152434	0.08906	3	142114614	5.129e-16	TRUE	0.00185573	65.7462
6081_52	35363	PCOC2	Procollagen C-endopeptidase enhancer 2	PCOLCE2	Q9UKZ9	ENSG00000163710	26577	HGNC:8739	rs73868258	A	G	0.2149	0.0214667	0.04306	3	142864731	1.366e-23	TRUE	0.00282609	100.217
6081_52	35365	PCOC2	Procollagen C-endopeptidase enhancer 2	PCOLCE2	Q9UKZ9	ENSG00000163710	26577	HGNC:8739	rs74770666	T	C	0.1845	0.0229377	0.03598	3	142633024	8.73e-16	TRUE	0.0018262	64.6981
6081_52	35365	PCOC2	Procollagen C-endopeptidase enhancer 2	PCOLCE2	Q9UKZ9	ENSG00000163710	26577	HGNC:8739	rs74834611	A	C	0.2788	0.0276518	0.02456	3	141909622	6.6e-24	TRUE	0.00286645	101.658
6081_52	35365	PCOC2	Procollagen C-endopeptidase enhancer 2	PCOLCE2	Q9UKZ9	ENSG00000163710	26577	HGNC:8739	rs75435634	T	C	0.1954	0.0199881	0.04826	3	143161596	1.43e-22	TRUE	0.00269516	95.5666
6081_52	35365	PCOC2	Procollagen C-endopeptidase enhancer 2	PCOLCE2	Q9UKZ9	ENSG00000163710	26577	HGNC:8739	rs75460088	T	C	0.0996	0.0174564	0.06261	3	141548899	1.159e-08	TRUE	0.000919732	32.5544
6081_52	35363	PCOC2	Procollagen C-endopeptidase enhancer 2	PCOLCE2	Q9UKZ9	ENSG00000163710	26577	HGNC:8739	rs75650836	G	A	-0.41	0.032468	0.01872	3	142558075	1.483e-36	TRUE	0.00448931	159.462
6081_52	35364	PCOC2	Procollagen C-endopeptidase enhancer 2	PCOLCE2	Q9UKZ9	ENSG00000163710	26577	HGNC:8739	rs76272027	T	G	0.1662	0.0265561	0.02607	3	143516929	3.888e-10	TRUE	0.00110641	39.1683
6081_52	35365	PCOC2	Procollagen C-endopeptidase enhancer 2	PCOLCE2	Q9UKZ9	ENSG00000163710	26577	HGNC:8739	rs7640225	A	T	0.14	0.0107464	0.19614	3	141894033	8.529e-39	TRUE	0.00477637	169.717
6081_52	35365	PCOC2	Procollagen C-endopeptidase enhancer 2	PCOLCE2	Q9UKZ9	ENSG00000163710	26577	HGNC:8739	rs7650880	A	C	-0.1404	0.0105005	0.79042	3	143098422	8.96e-41	TRUE	0.00503007	178.778
6081_52	35365	PCOC2	Procollagen C-endopeptidase enhancer 2	PCOLCE2	Q9UKZ9	ENSG00000163710	26577	HGNC:8739	rs76521071	T	C	-0.1201	0.020669	0.04465	3	143366489	6.224e-09	TRUE	0.000953855	33.7634
6081_52	35365	PCOC2	Procollagen C-endopeptidase enhancer 2	PCOLCE2	Q9UKZ9	ENSG00000163710	26577	HGNC:8739	rs7652340	A	T	0.0913	0.00873986	0.39465	3	141843165	1.522e-25	TRUE	0.00307642	109.127
6081_52	35365	PCOC2	Procollagen C-endopeptidase enhancer 2	PCOLCE2	Q9UKZ9	ENSG00000163710	26577	HGNC:8739	rs77907593	G	A	0.3225	0.0364903	0.01388	3	142494599	9.748e-19	TRUE	0.00220393	78.1096
6081_52	35365	PCOC2	Procollagen C-endopeptidase enhancer 2	PCOLCE2	Q9UKZ9	ENSG00000163710	26577	HGNC:8739	rs78322994	A	G	0.2144	0.0201843	0.04695	3	142663089	2.352e-26	TRUE	0.00318045	112.829
6081_52	35365	PCOC2	Procollagen C-endopeptidase enhancer 2	PCOLCE2	Q9UKZ9	ENSG00000163710	26577	HGNC:8739	rs78584418	T	G	0.199	0.0350242	0.01527	3	143415381	1.333e-08	TRUE	0.00091206	32.2826
6081_52	35365	PCOC2	Procollagen C-endopeptidase enhancer 2	PCOLCE2	Q9UKZ9	ENSG00000163710	26577	HGNC:8739	rs79058433	A	G	0.1231	0.021828	0.03954	3	142689745	1.705e-08	TRUE	0.000898563	31.8045
6081_52	35364	PCOC2	Procollagen C-endopeptidase enhancer 2	PCOLCE2	Q9UKZ9	ENSG00000163710	26577	HGNC:8739	rs9829564	C	T	-0.4234	0.011333	0.16533	3	142599423	1e-200	TRUE	0.0379721	1395.77
6081_52	35364	PCOC2	Procollagen C-endopeptidase enhancer 2	PCOLCE2	Q9UKZ9	ENSG00000163710	26577	HGNC:8739	rs9844161	A	G	-0.126	0.0226277	0.03895	3	142952184	2.571e-08	TRUE	0.000876077	31.007
6081_52	35365	PCOC2	Procollagen C-endopeptidase enhancer 2	PCOLCE2	Q9UKZ9	ENSG00000163710	26577	HGNC:8739	rs9853974	A	G	-0.0884	0.0114919	0.16773	3	142414888	1.444e-14	TRUE	0.00167051	59.173
6081_52	35364	PCOC2	Procollagen C-endopeptidase enhancer 2	PCOLCE2	Q9UKZ9	ENSG00000163710	26577	HGNC:8739	rs9869841	C	T	0.0475	0.00866655	0.57785	3	142953699	4.233e-08	TRUE	0.000848769	30.0397
15453_3	35361	a1-Microglobulin	Alpha-1-microglobulin	AMBP	P02760	ENSG00000106927	259	HGNC:453	rs10081699	A	G	0.0523	0.00905048	0.70674	9	117182478	7.528e-09	TRUE	0.000943518	33.3934
15453_3	35362	a1-Microglobulin	Alpha-1-microglobulin	AMBP	P02760	ENSG00000106927	259	HGNC:453	rs10982045	C	A	-0.0528	0.00927158	0.26841	9	116804300	1.235e-08	TRUE	0.000916326	32.431
15453_3	35363	a1-Microglobulin	Alpha-1-microglobulin	AMBP	P02760	ENSG00000106927	259	HGNC:453	rs12554621	A	G	0.0618	0.0111295	0.16293	9	116816780	2.811e-08	TRUE	0.000871212	30.8338
15453_3	35364	a1-Microglobulin	Alpha-1-microglobulin	AMBP	P02760	ENSG00000106927	259	HGNC:453	rs72759048	A	G	-0.0739	0.00973095	0.23322	9	116818660	3.094e-14	TRUE	0.0016283	57.6738
15453_3	35364	a1-Microglobulin	Alpha-1-microglobulin	AMBP	P02760	ENSG00000106927	259	HGNC:453	rs891724	A	G	0.0641	0.0101395	0.21388	9	116847365	2.585e-10	TRUE	0.0011289	39.9654
7083_74	35369	MATN4	Matrilin-4	MATN4	O95460	ENSG00000124159	8785	HGNC:6910	rs11569322	T	A	-0.1838	0.0322599	0.01532	20	44751645	1.216e-08	TRUE	0.000916995	32.4611
7083_74	35369	MATN4	Matrilin-4	MATN4	O95460	ENSG00000124159	8785	HGNC:6910	rs116928568	T	C	-0.148	0.0234546	0.02955	20	43368998	2.789e-10	TRUE	0.00112456	39.817
7083_74	35368	MATN4	Matrilin-4	MATN4	O95460	ENSG00000124159	8785	HGNC:6910	rs11699099	T	A	0.1001	0.00958578	0.22336	20	43878103	1.585e-25	TRUE	0.0030739	109.047
7083_74	35370	MATN4	Matrilin-4	MATN4	O95460	ENSG00000124159	8785	HGNC:6910	rs117810400	A	G	0.1941	0.0281257	0.01963	20	43472403	5.158e-12	TRUE	0.00134477	47.626
7083_74	35370	MATN4	Matrilin-4	MATN4	O95460	ENSG00000124159	8785	HGNC:6910	rs140120469	T	C	0.2612	0.0318149	0.01699	20	43691381	2.212e-16	TRUE	0.00190217	67.404
7083_74	35371	MATN4	Matrilin-4	MATN4	O95460	ENSG00000124159	8785	HGNC:6910	rs142062083	A	G	-0.1504	0.0275621	0.02246	20	42924043	4.849e-08	TRUE	0.000841166	29.7762
7083_74	35367	MATN4	Matrilin-4	MATN4	O95460	ENSG00000124159	8785	HGNC:6910	rs145371887	T	C	-0.2008	0.0231406	0.03117	20	44106754	4.05e-18	TRUE	0.00212461	75.2969
7083_74	35370	MATN4	Matrilin-4	MATN4	O95460	ENSG00000124159	8785	HGNC:6910	rs145706334	T	C	-0.1584	0.0269299	0.02315	20	43358540	4.055e-09	TRUE	0.000977249	34.5971
7083_74	35368	MATN4	Matrilin-4	MATN4	O95460	ENSG00000124159	8785	HGNC:6910	rs149671237	T	C	-0.1315	0.0221535	0.03503	20	44029484	2.923e-09	TRUE	0.00099529	35.2345
7083_74	35370	MATN4	Matrilin-4	MATN4	O95460	ENSG00000124159	8785	HGNC:6910	rs150186495	G	A	-0.1267	0.0173181	0.05817	20	43195376	2.554e-13	TRUE	0.00151107	53.5244
7083_74	35370	MATN4	Matrilin-4	MATN4	O95460	ENSG00000124159	8785	HGNC:6910	rs1555303	G	A	-0.0567	0.00877669	0.30311	20	43435386	1.045e-10	TRUE	0.00117864	41.7354
7083_74	35369	MATN4	Matrilin-4	MATN4	O95460	ENSG00000124159	8785	HGNC:6910	rs17381738	C	G	0.1031	0.0163765	0.066	20	44836776	3.062e-10	TRUE	0.00111941	39.6347
7083_74	35368	MATN4	Matrilin-4	MATN4	O95460	ENSG00000124159	8785	HGNC:6910	rs1983688	T	C	0.0598	0.00874148	0.31043	20	43588048	7.867e-12	TRUE	0.00132152	46.7986
7083_74	35370	MATN4	Matrilin-4	MATN4	O95460	ENSG00000124159	8785	HGNC:6910	rs2072728	G	A	-0.1111	0.00866242	0.31977	20	43547537	1.18e-37	TRUE	0.00462939	164.494
7083_74	35368	MATN4	Matrilin-4	MATN4	O95460	ENSG00000124159	8785	HGNC:6910	rs2231610	T	C	-0.0807	0.00808162	0.55381	20	44007674	1.762e-23	TRUE	0.00281152	99.7126
7083_74	35369	MATN4	Matrilin-4	MATN4	O95460	ENSG00000124159	8785	HGNC:6910	rs2233107	A	G	-0.3788	0.0264233	0.02435	20	43922403	1.307e-46	TRUE	0.00577737	205.516
7083_74	35370	MATN4	Matrilin-4	MATN4	O95460	ENSG00000124159	8785	HGNC:6910	rs2284272	C	T	0.152	0.010769	0.17021	20	43644031	3.086e-45	TRUE	0.00560131	199.223
7083_74	35369	MATN4	Matrilin-4	MATN4	O95460	ENSG00000124159	8785	HGNC:6910	rs2743317	T	C	0.1115	0.0095604	0.23233	20	43936931	1.977e-31	TRUE	0.00383118	136.018
7083_74	35370	MATN4	Matrilin-4	MATN4	O95460	ENSG00000124159	8785	HGNC:6910	rs41282774	G	A	-0.2457	0.033447	0.01438	20	44515133	2.043e-13	TRUE	0.00152343	53.963
7083_74	35368	MATN4	Matrilin-4	MATN4	O95460	ENSG00000124159	8785	HGNC:6910	rs6065825	T	C	0.0576	0.0102768	0.1867	20	44121730	2.084e-08	TRUE	0.000887485	31.4147
7083_74	35370	MATN4	Matrilin-4	MATN4	O95460	ENSG00000124159	8785	HGNC:6910	rs6073608	T	C	-0.2014	0.0110214	0.16076	20	43660532	1.345e-74	TRUE	0.00935304	333.921
7083_74	35368	MATN4	Matrilin-4	MATN4	O95460	ENSG00000124159	8785	HGNC:6910	rs6104152	C	T	-0.1894	0.0149453	0.07776	20	44051264	8.36e-37	TRUE	0.0045206	160.602
7083_74	35370	MATN4	Matrilin-4	MATN4	O95460	ENSG00000124159	8785	HGNC:6910	rs73106136	T	G	-0.1893	0.013749	0.09503	20	43491477	3.955e-43	TRUE	0.00533123	189.566
7083_74	35371	MATN4	Matrilin-4	MATN4	O95460	ENSG00000124159	8785	HGNC:6910	rs74174963	C	T	0.1847	0.0297792	0.01847	20	44364478	5.564e-10	TRUE	0.00108646	38.4687
7083_74	35370	MATN4	Matrilin-4	MATN4	O95460	ENSG00000124159	8785	HGNC:6910	rs76480930	T	C	-0.2518	0.0361571	0.01251	20	43404068	3.306e-12	TRUE	0.00136937	48.4982
7083_74	35370	MATN4	Matrilin-4	MATN4	O95460	ENSG00000124159	8785	HGNC:6910	rs78333826	C	G	0.102	0.0131235	0.10521	20	43559492	7.707e-15	TRUE	0.00170509	60.4087
7083_74	35369	MATN4	Matrilin-4	MATN4	O95460	ENSG00000124159	8785	HGNC:6910	rs9784191	G	A	-0.2493	0.00923008	0.2551	20	43939090	1.143e-160	TRUE	0.0202101	729.513
4154_57	35361	P-Selectin	P-selectin	SELP	P16109	ENSG00000174175	6403	HGNC:10721	rs112225107	T	C	-0.1448	0.0152138	0.07869	1	170140312	1.771e-21	TRUE	0.00255535	90.5861
4154_57	35363	P-Selectin	P-selectin	SELP	P16109	ENSG00000174175	6403	HGNC:10721	rs113212542	A	G	0.1223	0.0176838	0.05685	1	169607643	4.648e-12	TRUE	0.0013508	47.8301
4154_57	35360	P-Selectin	P-selectin	SELP	P16109	ENSG00000174175	6403	HGNC:10721	rs114158223	A	C	-0.1387	0.02003	0.04365	1	170065845	4.372e-12	TRUE	0.0013543	47.9501
4154_57	35361	P-Selectin	P-selectin	SELP	P16109	ENSG00000174175	6403	HGNC:10721	rs115707068	T	C	-0.2249	0.025943	0.02373	1	170298325	4.359e-18	TRUE	0.00212088	75.1517
4154_57	35361	P-Selectin	P-selectin	SELP	P16109	ENSG00000174175	6403	HGNC:10721	rs11583139	T	G	0.0705	0.00915055	0.28208	1	170154820	1.314e-14	TRUE	0.00167593	59.3587
4154_57	35363	P-Selectin	P-selectin	SELP	P16109	ENSG00000174175	6403	HGNC:10721	rs116032601	C	T	-0.2712	0.0294613	0.01986	1	169170286	3.407e-20	TRUE	0.00239063	84.7377
4154_57	35361	P-Selectin	P-selectin	SELP	P16109	ENSG00000174175	6403	HGNC:10721	rs116671235	T	C	-0.1624	0.0284997	0.02188	1	169047097	1.21e-08	TRUE	0.000917474	32.4708
4154_57	35362	P-Selectin	P-selectin	SELP	P16109	ENSG00000174175	6403	HGNC:10721	rs12145572	T	C	-0.2853	0.0379481	0.0122	1	168644962	5.555e-14	TRUE	0.00159594	56.5228
4154_57	35362	P-Selectin	P-selectin	SELP	P16109	ENSG00000174175	6403	HGNC:10721	rs12408451	G	A	-0.0603	0.00996741	0.78495	1	169456046	1.451e-09	TRUE	0.00103397	36.5991
4154_57	35363	P-Selectin	P-selectin	SELP	P16109	ENSG00000174175	6403	HGNC:10721	rs138205586	A	C	-0.5361	0.0419142	0.01023	1	169166371	1.855e-37	TRUE	0.00460511	163.595
4154_57	35361	P-Selectin	P-selectin	SELP	P16109	ENSG00000174175	6403	HGNC:10721	rs138515989	T	C	-0.3508	0.0322946	0.0177	1	168948558	1.739e-27	TRUE	0.00332593	117.994
4154_57	35355	P-Selectin	P-selectin	SELP	P16109	ENSG00000174175	6403	HGNC:10721	rs2235303	T	G	-0.1173	0.00820637	0.45998	1	169579822	2.393e-46	TRUE	0.00574599	204.312
4154_57	35352	P-Selectin	P-selectin	SELP	P16109	ENSG00000174175	6403	HGNC:10721	rs3917739	T	C	-0.0782	0.00869019	0.66485	1	169579378	2.285e-19	TRUE	0.00228545	80.9758
4154_57	35351	P-Selectin	P-selectin	SELP	P16109	ENSG00000174175	6403	HGNC:10721	rs3917870	T	C	0.1736	0.0313414	0.01866	1	169578249	3.042e-08	TRUE	0.00086718	30.6805
4154_57	35360	P-Selectin	P-selectin	SELP	P16109	ENSG00000174175	6403	HGNC:10721	rs6128	T	C	-0.0947	0.0115389	0.15006	1	169562904	2.267e-16	TRUE	0.00190134	67.3556
4154_57	35362	P-Selectin	P-selectin	SELP	P16109	ENSG00000174175	6403	HGNC:10721	rs72712048	A	G	0.1118	0.019069	0.04695	1	169627908	4.548e-09	TRUE	0.000971166	34.3738
4154_57	35363	P-Selectin	P-selectin	SELP	P16109	ENSG00000174175	6403	HGNC:10721	rs76095830	A	G	0.1189	0.0216309	0.03697	1	169596202	3.868e-08	TRUE	0.00085373	30.2145
4154_57	35364	P-Selectin	P-selectin	SELP	P16109	ENSG00000174175	6403	HGNC:10721	rs77390167	G	A	-0.2157	0.0293445	0.01959	1	169505498	1.973e-13	TRUE	0.00152562	54.0315
4154_57	35360	P-Selectin	P-selectin	SELP	P16109	ENSG00000174175	6403	HGNC:10721	rs9332504	G	C	0.1036	0.0145957	0.08589	1	169550336	1.266e-12	TRUE	0.00142286	50.3812
9883_29	35363	Glyoxalase I	Lactoylglutathione lyase	GLO1	Q04760	ENSG00000124767	2739	HGNC:4323	rs2748157	G	A	-0.055	0.00813949	0.46173	6	38512980	1.407e-11	TRUE	0.00128957	45.6595
9883_29	35362	Glyoxalase I	Lactoylglutathione lyase	GLO1	Q04760	ENSG00000124767	2739	HGNC:4323	rs4714184	C	T	0.051	0.00835038	0.37827	6	38765661	1.012e-09	TRUE	0.0010538	37.3016
9883_29	35362	Glyoxalase I	Lactoylglutathione lyase	GLO1	Q04760	ENSG00000124767	2739	HGNC:4323	rs73734424	G	A	0.1073	0.0113686	0.14995	6	38676730	3.789e-21	TRUE	0.00251294	89.0814
9883_29	35363	Glyoxalase I	Lactoylglutathione lyase	GLO1	Q04760	ENSG00000124767	2739	HGNC:4323	rs9462450	C	T	-0.1615	0.0144885	0.08733	6	38664940	7.422e-29	TRUE	0.00350149	124.251
5963_9	35370	Dermokine	Dermokine	DMKN	Q6E0U4	ENSG00000161249	93099	HGNC:25063	rs11882238	A	C	-0.054	0.00839436	0.39898	19	36031398	1.252e-10	TRUE	0.00116868	41.3821
5963_9	35379	Dermokine	Dermokine	DMKN	Q6E0U4	ENSG00000161249	93099	HGNC:25063	rs45527537	A	G	0.1321	0.0215576	0.03848	19	35998515	8.912e-10	TRUE	0.00106029	37.5495
5963_9	35376	Dermokine	Dermokine	DMKN	Q6E0U4	ENSG00000161249	93099	HGNC:25063	rs4805127	T	C	0.0522	0.0085338	0.37397	19	36007269	9.544e-10	TRUE	0.00105661	37.4159
5963_9	35378	Dermokine	Dermokine	DMKN	Q6E0U4	ENSG00000161249	93099	HGNC:25063	rs4806162	A	C	-0.0827	0.012374	0.12482	19	36002710	2.335e-11	TRUE	0.00126106	44.6675
8476_11	35366	CgA	Chromogranin-A	CHGA	P10645	ENSG00000100604	1113	HGNC:1929	rs111636355	A	G	-0.2309	0.0212582	0.03859	14	93431263	1.755e-27	TRUE	0.00332496	117.976
8476_11	35362	CgA	Chromogranin-A	CHGA	P10645	ENSG00000100604	1113	HGNC:1929	rs11625691	G	A	0.054	0.00942538	0.74277	14	93149291	1.009e-08	TRUE	0.000927415	32.8238
8476_11	35362	CgA	Chromogranin-A	CHGA	P10645	ENSG00000100604	1113	HGNC:1929	rs1242102	T	C	-0.045	0.00823294	0.48327	14	93201999	4.607e-08	TRUE	0.000844182	29.8755
8476_11	35365	CgA	Chromogranin-A	CHGA	P10645	ENSG00000100604	1113	HGNC:1929	rs1316506	A	G	0.1381	0.0149192	0.08251	14	93384453	2.112e-20	TRUE	0.00241711	85.6832
8476_11	35368	CgA	Chromogranin-A	CHGA	P10645	ENSG00000100604	1113	HGNC:1929	rs137906439	A	G	-0.1551	0.0224077	0.03469	14	93811310	4.462e-12	TRUE	0.00135286	47.9102
8476_11	35366	CgA	Chromogranin-A	CHGA	P10645	ENSG00000100604	1113	HGNC:1929	rs140066340	G	A	-0.2561	0.0283166	0.02167	14	93345302	1.508e-19	TRUE	0.00230767	81.7971
8476_11	35367	CgA	Chromogranin-A	CHGA	P10645	ENSG00000100604	1113	HGNC:1929	rs149165429	T	C	-0.1839	0.0286757	0.02115	14	93710865	1.426e-10	TRUE	0.0011616	41.1277
8476_11	35362	CgA	Chromogranin-A	CHGA	P10645	ENSG00000100604	1113	HGNC:1929	rs150344128	G	C	-0.2172	0.0377217	0.01154	14	92504744	8.514e-09	TRUE	0.000936736	33.154
8476_11	35366	CgA	Chromogranin-A	CHGA	P10645	ENSG00000100604	1113	HGNC:1929	rs17128723	A	G	0.0945	0.0169784	0.0645	14	93463645	2.608e-08	TRUE	0.000875245	30.9793
8476_11	35366	CgA	Chromogranin-A	CHGA	P10645	ENSG00000100604	1113	HGNC:1929	rs2402212	A	G	-0.053	0.00848452	0.36704	14	93358809	4.193e-10	TRUE	0.00110219	39.0209
8476_11	35365	CgA	Chromogranin-A	CHGA	P10645	ENSG00000100604	1113	HGNC:1929	rs2402224	T	C	-0.1012	0.00825615	0.44304	14	93392287	1.531e-34	TRUE	0.00423073	150.247
8476_11	35366	CgA	Chromogranin-A	CHGA	P10645	ENSG00000100604	1113	HGNC:1929	rs3783892	G	A	-0.0792	0.0135051	0.10221	14	93691003	4.506e-09	TRUE	0.000971566	34.3919
8476_11	35366	CgA	Chromogranin-A	CHGA	P10645	ENSG00000100604	1113	HGNC:1929	rs55997915	T	C	-0.0646	0.0114639	0.1506	14	93556554	1.75e-08	TRUE	0.00089711	31.7539
8476_11	35366	CgA	Chromogranin-A	CHGA	P10645	ENSG00000100604	1113	HGNC:1929	rs58969033	C	G	-0.1041	0.0179616	0.05536	14	93340973	6.804e-09	TRUE	0.000948936	33.59
8476_11	35368	CgA	Chromogranin-A	CHGA	P10645	ENSG00000100604	1113	HGNC:1929	rs61980303	T	C	-0.1169	0.0169051	0.06372	14	94242853	4.676e-12	TRUE	0.00135027	47.8183
8476_11	35362	CgA	Chromogranin-A	CHGA	P10645	ENSG00000100604	1113	HGNC:1929	rs7156367	G	A	-0.2387	0.0380721	0.01184	14	93174767	3.618e-10	TRUE	0.00111044	39.3088
8476_11	35365	CgA	Chromogranin-A	CHGA	P10645	ENSG00000100604	1113	HGNC:1929	rs729940	T	C	-0.338	0.0116678	0.14169	14	93399101	1.64e-184	TRUE	0.0231803	839.176
8476_11	35365	CgA	Chromogranin-A	CHGA	P10645	ENSG00000100604	1113	HGNC:1929	rs74074511	A	G	0.1056	0.0113954	0.15409	14	93406160	1.916e-20	TRUE	0.00242253	85.8758
8476_11	35366	CgA	Chromogranin-A	CHGA	P10645	ENSG00000100604	1113	HGNC:1929	rs79982246	A	G	-0.3116	0.0393731	0.01053	14	93440579	2.492e-15	TRUE	0.00176793	62.6318
8476_11	35366	CgA	Chromogranin-A	CHGA	P10645	ENSG00000100604	1113	HGNC:1929	rs8005216	A	G	-0.0818	0.00984873	0.22229	14	93455598	9.928e-17	TRUE	0.00194688	68.9837
8476_11	35366	CgA	Chromogranin-A	CHGA	P10645	ENSG00000100604	1113	HGNC:1929	rs8017818	G	A	-0.0977	0.0162011	0.06869	14	93651054	1.635e-09	TRUE	0.00102729	36.3664
8476_11	35365	CgA	Chromogranin-A	CHGA	P10645	ENSG00000100604	1113	HGNC:1929	rs9658667	A	G	-0.3805	0.0259958	0.02645	14	93399050	1.632e-48	TRUE	0.00602185	214.241
13132_14	35366	SEM5A	Semaphorin-5A	SEMA5A	Q13591	ENSG00000112902	9037	HGNC:10736	rs1024488	G	C	-0.0583	0.00976912	0.27263	5	9356924	2.405e-09	TRUE	0.00100607	35.6144
13132_14	35358	SEM5A	Semaphorin-5A	SEMA5A	Q13591	ENSG00000112902	9037	HGNC:10736	rs1032812	A	G	-0.0604	0.00876305	0.51757	5	8076436	5.479e-12	TRUE	0.00134189	47.5076
13132_14	35358	SEM5A	Semaphorin-5A	SEMA5A	Q13591	ENSG00000112902	9037	HGNC:10736	rs1035961	C	A	0.1804	0.0188762	0.056	5	9928862	1.212e-21	TRUE	0.00257668	91.3366
13132_14	35370	SEM5A	Semaphorin-5A	SEMA5A	Q13591	ENSG00000112902	9037	HGNC:10736	rs10513008	T	C	-0.174	0.02541	0.0304	5	9329867	7.505e-12	TRUE	0.00132405	46.8909
13132_14	35360	SEM5A	Semaphorin-5A	SEMA5A	Q13591	ENSG00000112902	9037	HGNC:10736	rs10513029	C	T	-0.1186	0.0113321	0.1777	5	9667062	1.24e-25	TRUE	0.00308827	109.533
13132_14	35359	SEM5A	Semaphorin-5A	SEMA5A	Q13591	ENSG00000112902	9037	HGNC:10736	rs111859402	C	G	0.5846	0.0308316	0.02109	5	9618307	3.577e-80	TRUE	0.010066	359.523
13132_14	35370	SEM5A	Semaphorin-5A	SEMA5A	Q13591	ENSG00000112902	9037	HGNC:10736	rs112835081	A	G	0.2213	0.0243161	0.03313	5	8492290	8.953e-20	TRUE	0.00233641	82.8276
13132_14	35360	SEM5A	Semaphorin-5A	SEMA5A	Q13591	ENSG00000112902	9037	HGNC:10736	rs113136522	C	T	0.4089	0.0397984	0.01281	5	9741113	9.203e-25	TRUE	0.0029766	105.561
13132_14	35369	SEM5A	Semaphorin-5A	SEMA5A	Q13591	ENSG00000112902	9037	HGNC:10736	rs115051461	G	A	0.1999	0.0308144	0.01945	5	9412805	8.743e-11	TRUE	0.00118851	42.0841
13132_14	35370	SEM5A	Semaphorin-5A	SEMA5A	Q13591	ENSG00000112902	9037	HGNC:10736	rs115193741	A	G	-0.1639	0.0277896	0.02506	5	9466068	3.682e-09	TRUE	0.00098255	34.785
13132_14	35364	SEM5A	Semaphorin-5A	SEMA5A	Q13591	ENSG00000112902	9037	HGNC:10736	rs115348864	C	T	-0.1362	0.0236286	0.03573	5	9579777	8.204e-09	TRUE	0.000938718	33.2261
13132_14	35360	SEM5A	Semaphorin-5A	SEMA5A	Q13591	ENSG00000112902	9037	HGNC:10736	rs115680218	G	A	-0.1287	0.0222742	0.03925	5	9743085	7.56e-09	TRUE	0.000943312	33.3851
13132_14	35369	SEM5A	Semaphorin-5A	SEMA5A	Q13591	ENSG00000112902	9037	HGNC:10736	rs116346391	A	T	1.3483	0.039126	0.01266	5	9511196	1e-200	TRUE	0.0324864	1187.53
13132_14	35369	SEM5A	Semaphorin-5A	SEMA5A	Q13591	ENSG00000112902	9037	HGNC:10736	rs116442571	C	T	-0.1362	0.0183956	0.05952	5	9515169	1.322e-13	TRUE	0.00154759	54.8184
13132_14	35361	SEM5A	Semaphorin-5A	SEMA5A	Q13591	ENSG00000112902	9037	HGNC:10736	rs116481640	G	A	0.1944	0.0160966	0.08028	5	9803411	1.396e-33	TRUE	0.00410805	145.856
13132_14	35359	SEM5A	Semaphorin-5A	SEMA5A	Q13591	ENSG00000112902	9037	HGNC:10736	rs118583	C	A	0.0642	0.00948955	0.30694	5	9715924	1.33e-11	TRUE	0.00129283	45.7698
13132_14	35358	SEM5A	Semaphorin-5A	SEMA5A	Q13591	ENSG00000112902	9037	HGNC:10736	rs12652744	T	G	-0.0825	0.0117293	0.16146	5	9850994	2.012e-12	TRUE	0.0013973	49.4722
13132_14	35370	SEM5A	Semaphorin-5A	SEMA5A	Q13591	ENSG00000112902	9037	HGNC:10736	rs12657858	A	G	0.2675	0.0207773	0.04446	5	9468865	6.252e-38	TRUE	0.00466477	165.757
13132_14	35371	SEM5A	Semaphorin-5A	SEMA5A	Q13591	ENSG00000112902	9037	HGNC:10736	rs13162370	A	C	-0.0578	0.0100983	0.74928	5	8227335	1.042e-08	TRUE	0.000925414	32.7613
13132_14	35372	SEM5A	Semaphorin-5A	SEMA5A	Q13591	ENSG00000112902	9037	HGNC:10736	rs13173799	G	A	0.1144	0.0171938	0.07005	5	8852806	2.861e-11	TRUE	0.00125005	44.2698
13132_14	35360	SEM5A	Semaphorin-5A	SEMA5A	Q13591	ENSG00000112902	9037	HGNC:10736	rs138131742	C	T	0.3734	0.0342068	0.01615	5	9684688	9.672e-28	TRUE	0.00335872	119.158
13132_14	35373	SEM5A	Semaphorin-5A	SEMA5A	Q13591	ENSG00000112902	9037	HGNC:10736	rs139079897	G	C	0.458	0.0338376	0.01768	5	8684173	9.686e-42	TRUE	0.00515278	183.203
13132_14	35371	SEM5A	Semaphorin-5A	SEMA5A	Q13591	ENSG00000112902	9037	HGNC:10736	rs140239212	T	C	-0.2586	0.0439962	0.01053	5	8211149	4.158e-09	TRUE	0.000975843	34.5483
13132_14	35369	SEM5A	Semaphorin-5A	SEMA5A	Q13591	ENSG00000112902	9037	HGNC:10736	rs141082117	A	C	0.1675	0.0256224	0.02955	5	9411617	6.266e-11	TRUE	0.00120689	42.7356
13132_14	35373	SEM5A	Semaphorin-5A	SEMA5A	Q13591	ENSG00000112902	9037	HGNC:10736	rs141657870	T	C	0.2453	0.0276276	0.02583	5	8754974	6.758e-19	TRUE	0.0022238	78.8333
13132_14	35373	SEM5A	Semaphorin-5A	SEMA5A	Q13591	ENSG00000112902	9037	HGNC:10736	rs141740556	C	T	-0.462	0.0328271	0.0176	5	9073897	5.507e-45	TRUE	0.00556861	198.07
13132_14	35369	SEM5A	Semaphorin-5A	SEMA5A	Q13591	ENSG00000112902	9037	HGNC:10736	rs141802015	A	G	0.2448	0.0361445	0.01523	5	8106518	1.263e-11	TRUE	0.00129532	45.871
13132_14	35364	SEM5A	Semaphorin-5A	SEMA5A	Q13591	ENSG00000112902	9037	HGNC:10736	rs144200216	C	T	-0.1706	0.0307026	0.01997	5	9606660	2.752e-08	TRUE	0.00087235	30.875
13132_14	35359	SEM5A	Semaphorin-5A	SEMA5A	Q13591	ENSG00000112902	9037	HGNC:10736	rs145541932	A	C	0.477	0.0286175	0.02387	5	9998396	2.235e-62	TRUE	0.00779648	277.826
13132_14	35369	SEM5A	Semaphorin-5A	SEMA5A	Q13591	ENSG00000112902	9037	HGNC:10736	rs148516956	A	G	0.2901	0.0281233	0.02508	5	9181224	6.01e-25	TRUE	0.00299958	106.405
13132_14	35360	SEM5A	Semaphorin-5A	SEMA5A	Q13591	ENSG00000112902	9037	HGNC:10736	rs149172428	T	C	1.1104	0.0322116	0.01846	5	9651343	1e-200	TRUE	0.0325155	1188.32
13132_14	35368	SEM5A	Semaphorin-5A	SEMA5A	Q13591	ENSG00000112902	9037	HGNC:10736	rs149357714	A	G	0.1982	0.0286011	0.02343	5	9408766	4.214e-12	TRUE	0.00135602	48.0223
13132_14	35361	SEM5A	Semaphorin-5A	SEMA5A	Q13591	ENSG00000112902	9037	HGNC:10736	rs150886547	T	C	0.3105	0.0335906	0.0164	5	9936763	2.382e-20	TRUE	0.00241068	85.4453
13132_14	35366	SEM5A	Semaphorin-5A	SEMA5A	Q13591	ENSG00000112902	9037	HGNC:10736	rs1651282	T	C	0.2706	0.00880058	0.59677	5	9547021	1e-200	TRUE	0.0260384	945.439
13132_14	35369	SEM5A	Semaphorin-5A	SEMA5A	Q13591	ENSG00000112902	9037	HGNC:10736	rs17257569	C	T	-0.2925	0.0169489	0.07149	5	9412551	9.79e-67	TRUE	0.00835077	297.829
13132_14	35370	SEM5A	Semaphorin-5A	SEMA5A	Q13591	ENSG00000112902	9037	HGNC:10736	rs17260912	C	T	-0.1071	0.0133609	0.11955	5	9493723	1.093e-15	TRUE	0.00181347	64.2553
13132_14	35373	SEM5A	Semaphorin-5A	SEMA5A	Q13591	ENSG00000112902	9037	HGNC:10736	rs17288252	G	C	-0.1588	0.0241501	0.03381	5	8688366	4.848e-11	TRUE	0.00122091	43.2376
13132_14	35370	SEM5A	Semaphorin-5A	SEMA5A	Q13591	ENSG00000112902	9037	HGNC:10736	rs1805936	G	A	0.1886	0.0100547	0.25324	5	9267527	1.683e-78	TRUE	0.00985004	351.842
13132_14	35362	SEM5A	Semaphorin-5A	SEMA5A	Q13591	ENSG00000112902	9037	HGNC:10736	rs1805971	T	C	-0.0838	0.0123038	0.14655	5	9204142	9.699e-12	TRUE	0.00131017	46.3884
13132_14	35370	SEM5A	Semaphorin-5A	SEMA5A	Q13591	ENSG00000112902	9037	HGNC:10736	rs1805989	G	A	0.8513	0.0335984	0.01785	5	9253666	1.234e-141	TRUE	0.0178281	641.989
13132_14	35365	SEM5A	Semaphorin-5A	SEMA5A	Q13591	ENSG00000112902	9037	HGNC:10736	rs1806067	C	T	-0.1279	0.0145741	0.09833	5	9205587	1.696e-18	TRUE	0.00217313	77.0158
13132_14	35359	SEM5A	Semaphorin-5A	SEMA5A	Q13591	ENSG00000112902	9037	HGNC:10736	rs194076	A	G	0.2094	0.0170172	0.07057	5	9616926	8.492e-35	TRUE	0.00426429	151.418
13132_14	35370	SEM5A	Semaphorin-5A	SEMA5A	Q13591	ENSG00000112902	9037	HGNC:10736	rs194259	A	G	0.2198	0.0368502	0.01519	5	9354699	2.451e-09	TRUE	0.00100491	35.5775
13132_14	35371	SEM5A	Semaphorin-5A	SEMA5A	Q13591	ENSG00000112902	9037	HGNC:10736	rs2135072	C	T	-0.1036	0.00932307	0.32675	5	9442007	1.094e-28	TRUE	0.00347909	123.482
13132_14	35367	SEM5A	Semaphorin-5A	SEMA5A	Q13591	ENSG00000112902	9037	HGNC:10736	rs2619915	A	G	0.0582	0.00900419	0.63646	5	9161347	1.022e-10	TRUE	0.00117997	41.7789
13132_14	35367	SEM5A	Semaphorin-5A	SEMA5A	Q13591	ENSG00000112902	9037	HGNC:10736	rs268534	C	T	-0.0952	0.00963272	0.29053	5	9438778	4.934e-23	TRUE	0.00275426	97.6734
13132_14	35372	SEM5A	Semaphorin-5A	SEMA5A	Q13591	ENSG00000112902	9037	HGNC:10736	rs268550	C	T	0.1637	0.0101628	0.75624	5	9533854	2.248e-58	TRUE	0.00728223	259.462
13132_14	35360	SEM5A	Semaphorin-5A	SEMA5A	Q13591	ENSG00000112902	9037	HGNC:10736	rs28363730	C	A	0.2532	0.0267958	0.02678	5	8075202	3.413e-21	TRUE	0.0025189	89.2881
13132_14	35361	SEM5A	Semaphorin-5A	SEMA5A	Q13591	ENSG00000112902	9037	HGNC:10736	rs2905187	G	T	-0.0815	0.00880133	0.43106	5	9775316	2.045e-20	TRUE	0.00241917	85.7469
13132_14	35360	SEM5A	Semaphorin-5A	SEMA5A	Q13591	ENSG00000112902	9037	HGNC:10736	rs2914723	C	T	-0.0676	0.00927344	0.67141	5	9941041	3.108e-13	TRUE	0.00150062	53.1388
13132_14	35355	SEM5A	Semaphorin-5A	SEMA5A	Q13591	ENSG00000112902	9037	HGNC:10736	rs314732	T	C	0.0559	0.00898413	0.39559	5	10031788	4.906e-10	TRUE	0.00109388	38.7143
13132_14	35372	SEM5A	Semaphorin-5A	SEMA5A	Q13591	ENSG00000112902	9037	HGNC:10736	rs34690633	G	A	-0.0935	0.0152534	0.0889	5	8305934	8.801e-10	TRUE	0.00106119	37.574
13132_14	35369	SEM5A	Semaphorin-5A	SEMA5A	Q13591	ENSG00000112902	9037	HGNC:10736	rs34918091	T	C	0.0542	0.0087766	0.56224	5	8148042	6.595e-10	TRUE	0.00107716	38.1369
13132_14	35370	SEM5A	Semaphorin-5A	SEMA5A	Q13591	ENSG00000112902	9037	HGNC:10736	rs34947431	T	C	0.5645	0.0326404	0.01763	5	9301884	5.173e-67	TRUE	0.00838589	299.101
13132_14	35370	SEM5A	Semaphorin-5A	SEMA5A	Q13591	ENSG00000112902	9037	HGNC:10736	rs35623831	T	C	-0.1293	0.0224254	0.03923	5	9475116	8.128e-09	TRUE	0.00093907	33.2442
13132_14	35368	SEM5A	Semaphorin-5A	SEMA5A	Q13591	ENSG00000112902	9037	HGNC:10736	rs3797928	T	C	0.2669	0.0144699	0.10277	5	9170323	5.698e-76	TRUE	0.00952847	340.226
13132_14	35365	SEM5A	Semaphorin-5A	SEMA5A	Q13591	ENSG00000112902	9037	HGNC:10736	rs3797954	T	C	-0.0919	0.00876733	0.53244	5	9222045	1.044e-25	TRUE	0.00309742	109.874
13132_14	35370	SEM5A	Semaphorin-5A	SEMA5A	Q13591	ENSG00000112902	9037	HGNC:10736	rs3798068	T	C	0.0988	0.00882559	0.40795	5	9523375	4.328e-29	TRUE	0.00353085	125.322
13132_14	35361	SEM5A	Semaphorin-5A	SEMA5A	Q13591	ENSG00000112902	9037	HGNC:10736	rs38090	G	A	0.1334	0.0105207	0.21833	5	9974280	7.653e-37	TRUE	0.00452641	160.777
13132_14	35363	SEM5A	Semaphorin-5A	SEMA5A	Q13591	ENSG00000112902	9037	HGNC:10736	rs388	A	G	-0.1584	0.00933905	0.32345	5	9604971	1.595e-64	TRUE	0.00806978	287.677
13132_14	35364	SEM5A	Semaphorin-5A	SEMA5A	Q13591	ENSG00000112902	9037	HGNC:10736	rs390	G	A	0.2226	0.0087377	0.57168	5	9604363	3.656e-143	TRUE	0.0180227	649.016
13132_14	35369	SEM5A	Semaphorin-5A	SEMA5A	Q13591	ENSG00000112902	9037	HGNC:10736	rs40657	C	T	-0.0723	0.01136	0.81755	5	9366751	1.96e-10	TRUE	0.001144	40.5061
13132_14	35371	SEM5A	Semaphorin-5A	SEMA5A	Q13591	ENSG00000112902	9037	HGNC:10736	rs40722	G	A	0.0967	0.00943909	0.31116	5	9388146	1.251e-24	TRUE	0.00295858	104.952
13132_14	35360	SEM5A	Semaphorin-5A	SEMA5A	Q13591	ENSG00000112902	9037	HGNC:10736	rs41458	A	G	0.2095	0.0225471	0.96194	5	9618473	1.519e-20	TRUE	0.00243579	86.335
13132_14	35359	SEM5A	Semaphorin-5A	SEMA5A	Q13591	ENSG00000112902	9037	HGNC:10736	rs41475	C	G	-0.0694	0.00977195	0.27816	5	9706885	1.23e-12	TRUE	0.0014245	50.4378
13132_14	35367	SEM5A	Semaphorin-5A	SEMA5A	Q13591	ENSG00000112902	9037	HGNC:10736	rs42354	A	G	-0.0767	0.00875133	0.45296	5	9186777	1.878e-18	TRUE	0.00216734	76.8144
13132_14	35369	SEM5A	Semaphorin-5A	SEMA5A	Q13591	ENSG00000112902	9037	HGNC:10736	rs425620	A	G	-0.1096	0.0165582	0.07476	5	9413362	3.614e-11	TRUE	0.00123726	43.8124
13132_14	35359	SEM5A	Semaphorin-5A	SEMA5A	Q13591	ENSG00000112902	9037	HGNC:10736	rs428378	C	A	0.0968	0.00918379	0.65693	5	9679139	5.631e-26	TRUE	0.00313234	111.098
13132_14	35360	SEM5A	Semaphorin-5A	SEMA5A	Q13591	ENSG00000112902	9037	HGNC:10736	rs434147	A	G	0.0893	0.00952805	0.70111	5	9990529	7.095e-21	TRUE	0.00247816	87.8405
13132_14	35371	SEM5A	Semaphorin-5A	SEMA5A	Q13591	ENSG00000112902	9037	HGNC:10736	rs436243	A	C	0.1234	0.0178136	0.93609	5	9453089	4.29e-12	TRUE	0.00135492	47.9872
13132_14	35359	SEM5A	Semaphorin-5A	SEMA5A	Q13591	ENSG00000112902	9037	HGNC:10736	rs4702639	T	C	-0.1173	0.0173764	0.06778	5	9716303	1.473e-11	TRUE	0.00128719	45.5697
13132_14	35358	SEM5A	Semaphorin-5A	SEMA5A	Q13591	ENSG00000112902	9037	HGNC:10736	rs55671245	A	G	0.1301	0.0158652	0.0839	5	9873745	2.397e-16	TRUE	0.00189835	67.2456
13132_14	35357	SEM5A	Semaphorin-5A	SEMA5A	Q13591	ENSG00000112902	9037	HGNC:10736	rs55743031	T	C	-0.077	0.00919941	0.33818	5	9862775	5.757e-17	TRUE	0.00197766	70.0586
13132_14	35361	SEM5A	Semaphorin-5A	SEMA5A	Q13591	ENSG00000112902	9037	HGNC:10736	rs60932004	T	C	-0.0927	0.0133148	0.12411	5	9979727	3.35e-12	TRUE	0.00136898	48.4722
13132_14	35361	SEM5A	Semaphorin-5A	SEMA5A	Q13591	ENSG00000112902	9037	HGNC:10736	rs62341231	A	G	-0.105	0.0174701	0.06723	5	9752981	1.852e-09	TRUE	0.00102058	36.1235
13132_14	35370	SEM5A	Semaphorin-5A	SEMA5A	Q13591	ENSG00000112902	9037	HGNC:10736	rs62342597	G	A	-0.1046	0.0180043	0.06281	5	9535448	6.258e-09	TRUE	0.000953421	33.7528
13132_14	35373	SEM5A	Semaphorin-5A	SEMA5A	Q13591	ENSG00000112902	9037	HGNC:10736	rs62358460	A	G	0.1375	0.00951023	0.29893	5	9008833	2.228e-47	TRUE	0.00587513	209.037
13132_14	35373	SEM5A	Semaphorin-5A	SEMA5A	Q13591	ENSG00000112902	9037	HGNC:10736	rs6555591	C	T	0.1045	0.0135713	0.88404	5	9077323	1.36e-14	TRUE	0.00167345	59.291
13132_14	35358	SEM5A	Semaphorin-5A	SEMA5A	Q13591	ENSG00000112902	9037	HGNC:10736	rs6555619	G	A	-0.0562	0.00884227	0.4152	5	9896146	2.073e-10	TRUE	0.00114126	40.3966
13132_14	35369	SEM5A	Semaphorin-5A	SEMA5A	Q13591	ENSG00000112902	9037	HGNC:10736	rs66526444	C	T	0.1037	0.0115739	0.16889	5	9462897	3.252e-19	TRUE	0.00226473	80.2784
13132_14	35370	SEM5A	Semaphorin-5A	SEMA5A	Q13591	ENSG00000112902	9037	HGNC:10736	rs6861299	G	A	0.1078	0.0154986	0.08753	5	8171759	3.514e-12	TRUE	0.00136599	48.3785
13132_14	35358	SEM5A	Semaphorin-5A	SEMA5A	Q13591	ENSG00000112902	9037	HGNC:10736	rs6877343	T	C	0.2243	0.0242009	0.03251	5	9899705	1.892e-20	TRUE	0.00242371	85.9007
13132_14	35368	SEM5A	Semaphorin-5A	SEMA5A	Q13591	ENSG00000112902	9037	HGNC:10736	rs6880904	T	A	0.3567	0.0392639	0.01189	5	8097956	1.04e-19	TRUE	0.00232821	82.5315
13132_14	35365	SEM5A	Semaphorin-5A	SEMA5A	Q13591	ENSG00000112902	9037	HGNC:10736	rs6881628	T	G	0.1535	0.0115279	0.82944	5	9539540	1.88e-40	TRUE	0.00498881	177.304
13132_14	35369	SEM5A	Semaphorin-5A	SEMA5A	Q13591	ENSG00000112902	9037	HGNC:10736	rs6887921	T	C	0.1109	0.00963621	0.70521	5	9422355	1.193e-30	TRUE	0.00373103	132.45
13132_14	35369	SEM5A	Semaphorin-5A	SEMA5A	Q13591	ENSG00000112902	9037	HGNC:10736	rs72727267	G	C	0.5511	0.0287091	0.02559	5	9369167	3.998e-82	TRUE	0.0103115	368.486
13132_14	35367	SEM5A	Semaphorin-5A	SEMA5A	Q13591	ENSG00000112902	9037	HGNC:10736	rs72729118	T	C	-0.1064	0.016122	0.07821	5	9437353	4.12e-11	TRUE	0.0012301	43.556
13132_14	35371	SEM5A	Semaphorin-5A	SEMA5A	Q13591	ENSG00000112902	9037	HGNC:10736	rs72729191	C	T	1.3935	0.0368618	0.08752	5	9536353	1e-200	TRUE	0.0388361	1429.1
13132_14	35365	SEM5A	Semaphorin-5A	SEMA5A	Q13591	ENSG00000112902	9037	HGNC:10736	rs72729713	A	C	-0.1546	0.0197277	0.05152	5	8063953	4.625e-15	TRUE	0.00173366	61.414
13132_14	35371	SEM5A	Semaphorin-5A	SEMA5A	Q13591	ENSG00000112902	9037	HGNC:10736	rs72731719	G	A	0.185	0.0297228	0.02215	5	8212307	4.841e-10	TRUE	0.00109412	38.7403
13132_14	35360	SEM5A	Semaphorin-5A	SEMA5A	Q13591	ENSG00000112902	9037	HGNC:10736	rs72733038	T	C	-0.1018	0.0131115	0.12825	5	9739307	8.217e-15	TRUE	0.00170202	60.2826
13132_14	35359	SEM5A	Semaphorin-5A	SEMA5A	Q13591	ENSG00000112902	9037	HGNC:10736	rs72733098	A	G	0.1168	0.0153047	0.08827	5	9829877	2.318e-14	TRUE	0.00164454	58.2418
13132_14	35358	SEM5A	Semaphorin-5A	SEMA5A	Q13591	ENSG00000112902	9037	HGNC:10736	rs73050383	A	C	0.2779	0.0156416	0.08435	5	9890885	1.279e-70	TRUE	0.00884896	315.657
13132_14	35359	SEM5A	Semaphorin-5A	SEMA5A	Q13591	ENSG00000112902	9037	HGNC:10736	rs739490	A	C	-0.1662	0.0267473	0.02722	5	9721767	5.175e-10	TRUE	0.00109082	38.6101
13132_14	35371	SEM5A	Semaphorin-5A	SEMA5A	Q13591	ENSG00000112902	9037	HGNC:10736	rs75495192	A	G	0.2203	0.0223086	0.03897	5	9150931	5.338e-23	TRUE	0.00274957	97.5176
13132_14	35364	SEM5A	Semaphorin-5A	SEMA5A	Q13591	ENSG00000112902	9037	HGNC:10736	rs75505503	C	G	-0.138	0.0204341	0.04886	5	9604665	1.444e-11	TRUE	0.0012881	45.6087
13132_14	35368	SEM5A	Semaphorin-5A	SEMA5A	Q13591	ENSG00000112902	9037	HGNC:10736	rs75782831	G	T	0.1337	0.0169475	0.07097	5	8130182	3.044e-15	TRUE	0.00175673	62.2377
13132_14	35368	SEM5A	Semaphorin-5A	SEMA5A	Q13591	ENSG00000112902	9037	HGNC:10736	rs76456360	C	G	-0.2362	0.0346817	0.01636	5	9543622	9.726e-12	TRUE	0.00130979	46.3829
13132_14	35358	SEM5A	Semaphorin-5A	SEMA5A	Q13591	ENSG00000112902	9037	HGNC:10736	rs76507551	A	G	0.226	0.0313021	0.01877	5	9901117	5.2e-13	TRUE	0.0014722	52.1279
13132_14	35369	SEM5A	Semaphorin-5A	SEMA5A	Q13591	ENSG00000112902	9037	HGNC:10736	rs76853181	T	C	-0.1207	0.0205823	0.04662	5	9106225	4.511e-09	TRUE	0.000971423	34.3897
13132_14	35369	SEM5A	Semaphorin-5A	SEMA5A	Q13591	ENSG00000112902	9037	HGNC:10736	rs7725153	G	A	-0.0952	0.009497	0.6978	5	8105591	1.193e-23	TRUE	0.00283316	100.485
13132_14	35363	SEM5A	Semaphorin-5A	SEMA5A	Q13591	ENSG00000112902	9037	HGNC:10736	rs7728549	A	G	0.2762	0.00862081	0.4716	5	9565826	1e-200	TRUE	0.0282097	1026.48
13132_14	35358	SEM5A	Semaphorin-5A	SEMA5A	Q13591	ENSG00000112902	9037	HGNC:10736	rs77472980	C	T	0.0709	0.0115569	0.17436	5	9871905	8.523e-10	TRUE	0.00106337	37.6366
13132_14	35360	SEM5A	Semaphorin-5A	SEMA5A	Q13591	ENSG00000112902	9037	HGNC:10736	rs77596129	C	T	0.2926	0.0182742	0.06115	5	9664164	1.06e-57	TRUE	0.00719856	256.372
13132_14	35360	SEM5A	Semaphorin-5A	SEMA5A	Q13591	ENSG00000112902	9037	HGNC:10736	rs77776453	C	T	0.2046	0.0327131	0.01797	5	9735602	3.991e-10	TRUE	0.0011051	39.1173
13132_14	35369	SEM5A	Semaphorin-5A	SEMA5A	Q13591	ENSG00000112902	9037	HGNC:10736	rs77953960	T	C	0.2145	0.0174836	0.06698	5	9427816	1.335e-34	TRUE	0.00423789	150.519
13132_14	35369	SEM5A	Semaphorin-5A	SEMA5A	Q13591	ENSG00000112902	9037	HGNC:10736	rs78592019	A	G	-0.1131	0.0161621	0.07872	5	9493037	2.599e-12	TRUE	0.00138271	48.9701
13132_14	35358	SEM5A	Semaphorin-5A	SEMA5A	Q13591	ENSG00000112902	9037	HGNC:10736	rs78873547	C	A	-0.1134	0.0179649	0.06401	5	9856861	2.749e-10	TRUE	0.0011257	39.8453
13132_14	35370	SEM5A	Semaphorin-5A	SEMA5A	Q13591	ENSG00000112902	9037	HGNC:10736	rs79031948	T	C	-0.2025	0.0352963	0.01462	5	9272371	9.629e-09	TRUE	0.000929771	32.9147
13132_14	35371	SEM5A	Semaphorin-5A	SEMA5A	Q13591	ENSG00000112902	9037	HGNC:10736	rs79256324	A	G	0.5218	0.0331325	0.01778	5	9447601	6.992e-56	TRUE	0.00696372	248.027
13132_14	35366	SEM5A	Semaphorin-5A	SEMA5A	Q13591	ENSG00000112902	9037	HGNC:10736	rs79781832	C	T	-0.1644	0.0283514	0.02485	5	8456189	6.685e-09	TRUE	0.000949905	33.6244
13132_14	35364	SEM5A	Semaphorin-5A	SEMA5A	Q13591	ENSG00000112902	9037	HGNC:10736	rs80128522	A	G	-0.195	0.0212009	0.04454	5	9602921	3.656e-20	TRUE	0.00238664	84.5982
13132_14	35366	SEM5A	Semaphorin-5A	SEMA5A	Q13591	ENSG00000112902	9037	HGNC:10736	rs805139	T	C	0.0916	0.0119702	0.15778	5	9317760	1.974e-14	TRUE	0.00165312	58.5579
13132_14	35368	SEM5A	Semaphorin-5A	SEMA5A	Q13591	ENSG00000112902	9037	HGNC:10736	rs805142	T	C	0.4203	0.032697	0.98194	5	9363240	8.126e-38	TRUE	0.00465043	165.235
13132_14	35367	SEM5A	Semaphorin-5A	SEMA5A	Q13591	ENSG00000112902	9037	HGNC:10736	rs828815	C	T	-0.0577	0.00929361	0.33147	5	8114747	5.347e-10	TRUE	0.00108877	38.5463
13132_14	35369	SEM5A	Semaphorin-5A	SEMA5A	Q13591	ENSG00000112902	9037	HGNC:10736	rs916990	A	G	0.1049	0.0182439	0.0612	5	9331490	8.931e-09	TRUE	0.000933926	33.0611
13132_14	35359	SEM5A	Semaphorin-5A	SEMA5A	Q13591	ENSG00000112902	9037	HGNC:10736	rs985249	C	T	-0.0842	0.00938147	0.31255	5	9829363	2.83e-19	TRUE	0.0022731	80.5531
18880_81	35365	Collagen Type III	Collagen Type III	COL3A1	P02461	ENSG00000168542	1281	HGNC:2201	rs10804025	A	G	0.0498	0.00846501	0.41906	2	189787788	4.028e-09	TRUE	0.000977754	34.6102
18880_81	35365	Collagen Type III	Collagen Type III	COL3A1	P02461	ENSG00000168542	1281	HGNC:2201	rs11884298	C	T	-0.0503	0.00873211	0.35687	2	189749485	8.394e-09	TRUE	0.000937435	33.1816
18880_81	35366	Collagen Type III	Collagen Type III	COL3A1	P02461	ENSG00000168542	1281	HGNC:2201	rs28763878	A	T	0.1167	0.0194276	0.04842	2	189868535	1.891e-09	TRUE	0.00101929	36.0829
18880_81	35368	Collagen Type III	Collagen Type III	COL3A1	P02461	ENSG00000168542	1281	HGNC:2201	rs72914144	T	C	0.0772	0.0108584	0.18304	2	190241743	1.163e-12	TRUE	0.00142724	50.5478
18880_81	35366	Collagen Type III	Collagen Type III	COL3A1	P02461	ENSG00000168542	1281	HGNC:2201	rs7579903	A	G	-0.0669	0.0121306	0.1363	2	189862097	3.488e-08	TRUE	0.00085932	30.4151
7779_86	35361	CHSTB	Carbohydrate sulfotransferase 11	CHST11	Q9NPF2	ENSG00000171310	50515	HGNC:17422	rs10778339	C	T	0.0686	0.0113468	0.1613	12	104907051	1.487e-09	TRUE	0.00103265	36.5513
7779_86	35361	CHSTB	Carbohydrate sulfotransferase 11	CHST11	Q9NPF2	ENSG00000171310	50515	HGNC:17422	rs11112069	A	T	-0.1512	0.0103506	0.19533	12	104867018	2.505e-48	TRUE	0.00599869	213.388
7779_86	35360	CHSTB	Carbohydrate sulfotransferase 11	CHST11	Q9NPF2	ENSG00000171310	50515	HGNC:17422	rs11112100	C	T	-0.1122	0.0109891	0.16927	12	104951698	1.787e-24	TRUE	0.00293963	104.246
7779_86	35355	CHSTB	Carbohydrate sulfotransferase 11	CHST11	Q9NPF2	ENSG00000171310	50515	HGNC:17422	rs11112147	A	G	-0.0847	0.0104821	0.1901	12	105054141	6.454e-16	TRUE	0.00184349	65.2933
7779_86	35361	CHSTB	Carbohydrate sulfotransferase 11	CHST11	Q9NPF2	ENSG00000171310	50515	HGNC:17422	rs111850578	A	C	0.2147	0.0230086	0.03201	12	104307481	1.046e-20	TRUE	0.00245649	87.0728
7779_86	35361	CHSTB	Carbohydrate sulfotransferase 11	CHST11	Q9NPF2	ENSG00000171310	50515	HGNC:17422	rs112368873	T	C	0.2455	0.0332902	0.01505	12	104852767	1.649e-13	TRUE	0.00153569	54.384
7779_86	35356	CHSTB	Carbohydrate sulfotransferase 11	CHST11	Q9NPF2	ENSG00000171310	50515	HGNC:17422	rs11608393	T	C	0.0573	0.0087747	0.32548	12	105027435	6.571e-11	TRUE	0.00120471	42.6427
7779_86	35356	CHSTB	Carbohydrate sulfotransferase 11	CHST11	Q9NPF2	ENSG00000171310	50515	HGNC:17422	rs11614814	A	G	-0.1911	0.0202959	0.04362	12	104984336	4.699e-21	TRUE	0.00250138	88.6556
7779_86	35361	CHSTB	Carbohydrate sulfotransferase 11	CHST11	Q9NPF2	ENSG00000171310	50515	HGNC:17422	rs116922401	G	A	0.1714	0.0216283	0.03767	12	104882626	2.285e-15	TRUE	0.00177299	62.8026
7779_86	35356	CHSTB	Carbohydrate sulfotransferase 11	CHST11	Q9NPF2	ENSG00000171310	50515	HGNC:17422	rs117380055	A	G	-0.1986	0.0237278	0.03175	12	105003265	5.765e-17	TRUE	0.00197763	70.0558
7779_86	35355	CHSTB	Carbohydrate sulfotransferase 11	CHST11	Q9NPF2	ENSG00000171310	50515	HGNC:17422	rs117580048	T	C	-0.1199	0.0173263	0.05988	12	105695164	4.513e-12	TRUE	0.00135273	47.8879
7779_86	35362	CHSTB	Carbohydrate sulfotransferase 11	CHST11	Q9NPF2	ENSG00000171310	50515	HGNC:17422	rs117638112	G	A	0.1912	0.0336829	0.01529	12	104216732	1.375e-08	TRUE	0.000910436	32.2223
7779_86	35361	CHSTB	Carbohydrate sulfotransferase 11	CHST11	Q9NPF2	ENSG00000171310	50515	HGNC:17422	rs118000883	G	A	-0.1758	0.0243357	0.03079	12	104859914	5.05e-13	TRUE	0.0014737	52.1854
7779_86	35361	CHSTB	Carbohydrate sulfotransferase 11	CHST11	Q9NPF2	ENSG00000171310	50515	HGNC:17422	rs12579643	T	C	0.235	0.0402688	0.0109	12	104411938	5.354e-09	TRUE	0.000962231	34.0563
7779_86	35357	CHSTB	Carbohydrate sulfotransferase 11	CHST11	Q9NPF2	ENSG00000171310	50515	HGNC:17422	rs1353191	T	C	-0.0589	0.00898933	0.69296	12	105164899	5.669e-11	TRUE	0.00121283	42.9315
7779_86	35361	CHSTB	Carbohydrate sulfotransferase 11	CHST11	Q9NPF2	ENSG00000171310	50515	HGNC:17422	rs138888747	T	C	0.1241	0.0176522	0.0584	12	104690852	2.061e-12	TRUE	0.00139585	49.425
7779_86	35358	CHSTB	Carbohydrate sulfotransferase 11	CHST11	Q9NPF2	ENSG00000171310	50515	HGNC:17422	rs139755435	A	G	0.1765	0.0292028	0.01945	12	105206830	1.504e-09	TRUE	0.00103211	36.5292
7779_86	35355	CHSTB	Carbohydrate sulfotransferase 11	CHST11	Q9NPF2	ENSG00000171310	50515	HGNC:17422	rs145125003	T	C	0.1525	0.0268641	0.02412	12	105704535	1.373e-08	TRUE	0.000910696	32.2252
7779_86	35356	CHSTB	Carbohydrate sulfotransferase 11	CHST11	Q9NPF2	ENSG00000171310	50515	HGNC:17422	rs146776981	A	G	0.2027	0.0287271	0.02099	12	105012132	1.713e-12	TRUE	0.00140629	49.7879
7779_86	35361	CHSTB	Carbohydrate sulfotransferase 11	CHST11	Q9NPF2	ENSG00000171310	50515	HGNC:17422	rs150376682	A	G	0.1555	0.0226759	0.03547	12	104895707	7.007e-12	TRUE	0.00132818	47.0255
7779_86	35361	CHSTB	Carbohydrate sulfotransferase 11	CHST11	Q9NPF2	ENSG00000171310	50515	HGNC:17422	rs1564892	G	A	0.0569	0.00999491	0.22139	12	104445742	1.249e-08	TRUE	0.000915734	32.4091
7779_86	35360	CHSTB	Carbohydrate sulfotransferase 11	CHST11	Q9NPF2	ENSG00000171310	50515	HGNC:17422	rs1650127	T	C	-0.2756	0.00876664	0.31498	12	104969563	1e-200	TRUE	0.0271914	988.308
7779_86	35356	CHSTB	Carbohydrate sulfotransferase 11	CHST11	Q9NPF2	ENSG00000171310	50515	HGNC:17422	rs17035985	T	G	0.2093	0.0150581	0.08621	12	105010926	6.378e-44	TRUE	0.00543492	193.196
7779_86	35362	CHSTB	Carbohydrate sulfotransferase 11	CHST11	Q9NPF2	ENSG00000171310	50515	HGNC:17422	rs17806300	A	G	-0.1063	0.0182736	0.05399	12	104514359	5.987e-09	TRUE	0.000956067	33.8389
7779_86	35360	CHSTB	Carbohydrate sulfotransferase 11	CHST11	Q9NPF2	ENSG00000171310	50515	HGNC:17422	rs17812021	G	C	0.0909	0.0166109	0.06535	12	104928663	4.442e-08	TRUE	0.000846226	29.9462
7779_86	35360	CHSTB	Carbohydrate sulfotransferase 11	CHST11	Q9NPF2	ENSG00000171310	50515	HGNC:17422	rs17812685	G	A	0.1279	0.013715	0.09944	12	104944811	1.104e-20	TRUE	0.00245355	86.9661
7779_86	35360	CHSTB	Carbohydrate sulfotransferase 11	CHST11	Q9NPF2	ENSG00000171310	50515	HGNC:17422	rs2252511	T	C	-0.0667	0.00992078	0.22278	12	104809826	1.777e-11	TRUE	0.00127678	45.2023
7779_86	35359	CHSTB	Carbohydrate sulfotransferase 11	CHST11	Q9NPF2	ENSG00000171310	50515	HGNC:17422	rs2374395	G	A	0.1097	0.0169447	0.06315	12	104819317	9.544e-11	TRUE	0.00118401	41.9127
7779_86	35356	CHSTB	Carbohydrate sulfotransferase 11	CHST11	Q9NPF2	ENSG00000171310	50515	HGNC:17422	rs2696004	G	A	0.1315	0.00833998	0.57565	12	105036665	5.213e-56	TRUE	0.00698296	248.612
7779_86	35361	CHSTB	Carbohydrate sulfotransferase 11	CHST11	Q9NPF2	ENSG00000171310	50515	HGNC:17422	rs2888822	C	G	-0.2379	0.0247255	0.97138	12	104883345	6.479e-22	TRUE	0.00261134	92.576
7779_86	35356	CHSTB	Carbohydrate sulfotransferase 11	CHST11	Q9NPF2	ENSG00000171310	50515	HGNC:17422	rs34725367	T	C	0.1561	0.0271723	0.02383	12	104991268	9.202e-09	TRUE	0.000932629	33.0029
7779_86	35356	CHSTB	Carbohydrate sulfotransferase 11	CHST11	Q9NPF2	ENSG00000171310	50515	HGNC:17422	rs55857339	A	G	-0.1882	0.0159474	0.07101	12	105016713	3.843e-32	TRUE	0.00392387	139.271
7779_86	35360	CHSTB	Carbohydrate sulfotransferase 11	CHST11	Q9NPF2	ENSG00000171310	50515	HGNC:17422	rs58685743	T	C	0.2227	0.0116214	0.14572	12	104951085	7.56e-82	TRUE	0.0102789	367.215
7779_86	35354	CHSTB	Carbohydrate sulfotransferase 11	CHST11	Q9NPF2	ENSG00000171310	50515	HGNC:17422	rs703667	G	A	-0.131	0.0144864	0.08818	12	105067844	1.525e-19	TRUE	0.00230782	81.7749
7779_86	35358	CHSTB	Carbohydrate sulfotransferase 11	CHST11	Q9NPF2	ENSG00000171310	50515	HGNC:17422	rs7301450	A	G	-0.1179	0.00923965	0.27169	12	104982947	2.734e-37	TRUE	0.00458414	162.823
7779_86	35360	CHSTB	Carbohydrate sulfotransferase 11	CHST11	Q9NPF2	ENSG00000171310	50515	HGNC:17422	rs73185486	A	G	-0.1637	0.0247775	0.02935	12	104947834	3.927e-11	TRUE	0.00123299	43.6499
7779_86	35354	CHSTB	Carbohydrate sulfotransferase 11	CHST11	Q9NPF2	ENSG00000171310	50515	HGNC:17422	rs73191429	G	A	-0.1673	0.0154934	0.07901	12	105068104	3.513e-27	TRUE	0.0032874	116.6
7779_86	35362	CHSTB	Carbohydrate sulfotransferase 11	CHST11	Q9NPF2	ENSG00000171310	50515	HGNC:17422	rs73394538	C	G	0.0887	0.0114991	0.15406	12	104635194	1.223e-14	TRUE	0.00167986	59.4999
7779_86	35356	CHSTB	Carbohydrate sulfotransferase 11	CHST11	Q9NPF2	ENSG00000171310	50515	HGNC:17422	rs74524582	G	T	0.1998	0.034801	0.01535	12	105025819	9.4e-09	TRUE	0.00093146	32.9615
7779_86	35356	CHSTB	Carbohydrate sulfotransferase 11	CHST11	Q9NPF2	ENSG00000171310	50515	HGNC:17422	rs746034	G	A	0.2476	0.0086018	0.34286	12	104991880	3.338e-182	TRUE	0.0228993	828.557
7779_86	35367	CHSTB	Carbohydrate sulfotransferase 11	CHST11	Q9NPF2	ENSG00000171310	50515	HGNC:17422	rs76462566	C	G	0.2239	0.039052	0.0108	12	103898383	9.845e-09	TRUE	0.000928633	32.8716
7779_86	35362	CHSTB	Carbohydrate sulfotransferase 11	CHST11	Q9NPF2	ENSG00000171310	50515	HGNC:17422	rs76535128	A	G	-0.1215	0.0172102	0.06115	12	104174939	1.668e-12	TRUE	0.00140752	49.8401
7779_86	35360	CHSTB	Carbohydrate sulfotransferase 11	CHST11	Q9NPF2	ENSG00000171310	50515	HGNC:17422	rs78307561	C	T	0.2023	0.0297108	0.02069	12	104826920	9.83e-12	TRUE	0.0013095	46.3621
7779_86	35358	CHSTB	Carbohydrate sulfotransferase 11	CHST11	Q9NPF2	ENSG00000171310	50515	HGNC:17422	rs78700431	A	G	0.2659	0.0345134	0.01531	12	104980128	1.316e-14	TRUE	0.00167599	59.3557
7779_86	35361	CHSTB	Carbohydrate sulfotransferase 11	CHST11	Q9NPF2	ENSG00000171310	50515	HGNC:17422	rs79213114	A	G	0.197	0.0255155	0.02803	12	104899186	1.156e-14	TRUE	0.00168304	59.6108
7779_86	35361	CHSTB	Carbohydrate sulfotransferase 11	CHST11	Q9NPF2	ENSG00000171310	50515	HGNC:17422	rs7953577	C	G	-0.1231	0.00875475	0.33178	12	104874300	6.601e-45	TRUE	0.00556041	197.71
7779_86	35361	CHSTB	Carbohydrate sulfotransferase 11	CHST11	Q9NPF2	ENSG00000171310	50515	HGNC:17422	rs7953927	C	T	-0.0811	0.0101879	0.79132	12	104858328	1.714e-15	TRUE	0.00178895	63.3689
7779_86	35361	CHSTB	Carbohydrate sulfotransferase 11	CHST11	Q9NPF2	ENSG00000171310	50515	HGNC:17422	rs7971440	C	G	0.0523	0.00885532	0.31884	12	104233986	3.504e-09	TRUE	0.000985523	34.8815
7779_86	35358	CHSTB	Carbohydrate sulfotransferase 11	CHST11	Q9NPF2	ENSG00000171310	50515	HGNC:17422	rs8181668	T	C	-0.0471	0.00852793	0.62252	12	105843089	3.332e-08	TRUE	0.00086202	30.5039
7779_86	35355	CHSTB	Carbohydrate sulfotransferase 11	CHST11	Q9NPF2	ENSG00000171310	50515	HGNC:17422	rs856595	C	T	-0.0974	0.00825292	0.53268	12	105061447	3.817e-32	TRUE	0.00392435	139.284
8874_53	35353	CLN5	Ceroid-lipofuscinosis neuronal protein 5	CLN5	O75503	ENSG00000102805	1203	HGNC:2076	rs12869198	T	A	-0.1676	0.0239341	0.02675	13	77536808	2.513e-12	TRUE	0.0013852	49.0361
8874_53	35353	CLN5	Ceroid-lipofuscinosis neuronal protein 5	CLN5	O75503	ENSG00000102805	1203	HGNC:2076	rs642394	T	C	0.0528	0.00840643	0.67125	13	77565655	3.366e-10	TRUE	0.0011147	39.4498
8874_53	35353	CLN5	Ceroid-lipofuscinosis neuronal protein 5	CLN5	O75503	ENSG00000102805	1203	HGNC:2076	rs700363	A	G	-0.172	0.013697	0.08986	13	77575396	3.614e-36	TRUE	0.00444093	157.692
13112_179	35352	FSTL1	Follistatin-related protein 1	FSTL1	Q12841	ENSG00000163430	11167	HGNC:3972	rs113195351	T	C	-0.2277	0.0277144	0.02323	3	120151248	2.105e-16	TRUE	0.00190589	67.5018
13112_179	35352	FSTL1	Follistatin-related protein 1	FSTL1	Q12841	ENSG00000163430	11167	HGNC:3972	rs1147707	T	C	-0.1507	0.00848818	0.37455	3	120169248	1.602e-70	TRUE	0.00883798	315.208
13112_179	35353	FSTL1	Follistatin-related protein 1	FSTL1	Q12841	ENSG00000163430	11167	HGNC:3972	rs1147733	T	C	0.087	0.00894121	0.30012	3	120230210	2.241e-22	TRUE	0.00267105	94.6772
13112_179	35353	FSTL1	Follistatin-related protein 1	FSTL1	Q12841	ENSG00000163430	11167	HGNC:3972	rs1259292	T	C	-0.1	0.00932189	0.73838	3	120136417	7.566e-27	TRUE	0.00324474	115.078
13112_179	35353	FSTL1	Follistatin-related protein 1	FSTL1	Q12841	ENSG00000163430	11167	HGNC:3972	rs1259491	A	C	0.0761	0.0104219	0.19225	3	120242866	2.836e-13	TRUE	0.00150599	53.3187
13112_179	35352	FSTL1	Follistatin-related protein 1	FSTL1	Q12841	ENSG00000163430	11167	HGNC:3972	rs1733302	C	T	-0.0807	0.0147477	0.91463	3	120154181	4.449e-08	TRUE	0.000846331	29.9432
13112_179	35348	FSTL1	Follistatin-related protein 1	FSTL1	Q12841	ENSG00000163430	11167	HGNC:3972	rs4676808	C	T	-0.0641	0.0103866	0.19527	3	120338500	6.769e-10	TRUE	0.00107636	38.0861
13112_179	35352	FSTL1	Follistatin-related protein 1	FSTL1	Q12841	ENSG00000163430	11167	HGNC:3972	rs78226443	T	C	0.1399	0.0191538	0.04908	3	120152163	2.793e-13	TRUE	0.00150688	53.3487
13112_179	35353	FSTL1	Follistatin-related protein 1	FSTL1	Q12841	ENSG00000163430	11167	HGNC:3972	rs79184149	A	G	0.1246	0.0194212	0.04679	3	120060584	1.402e-10	TRUE	0.00116299	41.1609
19590_46	35370	SP-D	Pulmonary surfactant-associated protein D	SFTPD	P35247	ENSG00000133661	6441	HGNC:10803	rs10762828	T	C	0.0576	0.0089225	0.27621	10	80763382	1.078e-10	TRUE	0.00117693	41.6746
19590_46	35363	SP-D	Pulmonary surfactant-associated protein D	SFTPD	P35247	ENSG00000133661	6441	HGNC:10803	rs10824753	A	G	0.0644	0.00802645	0.47952	10	81172114	1.028e-15	TRUE	0.00181723	64.3761
19590_46	35367	SP-D	Pulmonary surfactant-associated protein D	SFTPD	P35247	ENSG00000133661	6441	HGNC:10803	rs10887378	C	T	-0.3377	0.0114908	0.13872	10	81780944	7.674e-190	TRUE	0.02384	863.692
19590_46	35367	SP-D	Pulmonary surfactant-associated protein D	SFTPD	P35247	ENSG00000133661	6441	HGNC:10803	rs10887721	C	G	-0.136	0.0123603	0.11916	10	82045354	3.697e-28	TRUE	0.00341164	121.066
19590_46	35368	SP-D	Pulmonary surfactant-associated protein D	SFTPD	P35247	ENSG00000133661	6441	HGNC:10803	rs11002818	C	G	0.1043	0.0134127	0.10179	10	80862603	7.473e-15	TRUE	0.0017069	60.4694
19590_46	35370	SP-D	Pulmonary surfactant-associated protein D	SFTPD	P35247	ENSG00000133661	6441	HGNC:10803	rs11002893	G	A	0.1104	0.0112413	0.15261	10	81012071	9.148e-23	TRUE	0.00271965	96.451
19590_46	35363	SP-D	Pulmonary surfactant-associated protein D	SFTPD	P35247	ENSG00000133661	6441	HGNC:10803	rs11002962	A	G	0.0502	0.00819288	0.58721	10	81167080	8.94e-10	TRUE	0.00106059	37.5434
19590_46	35366	SP-D	Pulmonary surfactant-associated protein D	SFTPD	P35247	ENSG00000133661	6441	HGNC:10803	rs11002991	C	T	0.0904	0.0155159	0.07286	10	81215357	5.667e-09	TRUE	0.000958975	33.9458
19590_46	35368	SP-D	Pulmonary surfactant-associated protein D	SFTPD	P35247	ENSG00000133661	6441	HGNC:10803	rs111244731	T	C	-0.0816	0.0135455	0.09714	10	81086460	1.7e-09	TRUE	0.00102509	36.2904
19590_46	35360	SP-D	Pulmonary surfactant-associated protein D	SFTPD	P35247	ENSG00000133661	6441	HGNC:10803	rs11186429	C	T	0.0459	0.00813246	0.43542	10	82408975	1.661e-08	TRUE	0.000900124	31.8553
19590_46	35368	SP-D	Pulmonary surfactant-associated protein D	SFTPD	P35247	ENSG00000133661	6441	HGNC:10803	rs111904790	A	G	-0.3255	0.040371	0.01091	10	82299510	7.462e-16	TRUE	0.00183476	65.0073
19590_46	35368	SP-D	Pulmonary surfactant-associated protein D	SFTPD	P35247	ENSG00000133661	6441	HGNC:10803	rs112436970	T	C	0.4316	0.0138472	0.09254	10	81665069	1e-200	TRUE	0.0267352	971.491
19590_46	35368	SP-D	Pulmonary surfactant-associated protein D	SFTPD	P35247	ENSG00000133661	6441	HGNC:10803	rs113031371	A	G	-0.1379	0.0194331	0.04485	10	80959220	1.283e-12	TRUE	0.0014218	50.355
19590_46	35363	SP-D	Pulmonary surfactant-associated protein D	SFTPD	P35247	ENSG00000133661	6441	HGNC:10803	rs113900355	A	G	0.2345	0.0305163	0.01798	10	82438371	1.537e-14	TRUE	0.00166714	59.0502
19590_46	35369	SP-D	Pulmonary surfactant-associated protein D	SFTPD	P35247	ENSG00000133661	6441	HGNC:10803	rs11594933	A	G	-0.2073	0.0337138	0.01432	10	81069147	7.806e-10	TRUE	0.00106788	37.808
19590_46	35370	SP-D	Pulmonary surfactant-associated protein D	SFTPD	P35247	ENSG00000133661	6441	HGNC:10803	rs117366864	T	C	0.1184	0.0156846	0.06937	10	82517979	4.392e-14	TRUE	0.0016086	56.9848
19590_46	35370	SP-D	Pulmonary surfactant-associated protein D	SFTPD	P35247	ENSG00000133661	6441	HGNC:10803	rs117485833	T	C	0.114	0.0131411	0.10623	10	82278163	4.133e-18	TRUE	0.0021233	75.2568
19590_46	35368	SP-D	Pulmonary surfactant-associated protein D	SFTPD	P35247	ENSG00000133661	6441	HGNC:10803	rs117495385	A	G	-0.1451	0.0262556	0.02355	10	81028742	3.268e-08	TRUE	0.000862839	30.5415
19590_46	35368	SP-D	Pulmonary surfactant-associated protein D	SFTPD	P35247	ENSG00000133661	6441	HGNC:10803	rs117568696	C	G	-0.3149	0.0378602	0.01152	10	81704882	8.988e-17	TRUE	0.00195229	69.1799
19590_46	35370	SP-D	Pulmonary surfactant-associated protein D	SFTPD	P35247	ENSG00000133661	6441	HGNC:10803	rs117641451	A	G	0.2523	0.0271119	0.022	10	82208895	1.329e-20	TRUE	0.00244254	86.5992
19590_46	35367	SP-D	Pulmonary surfactant-associated protein D	SFTPD	P35247	ENSG00000133661	6441	HGNC:10803	rs117853648	A	G	0.1477	0.024828	0.02758	10	81822956	2.699e-09	TRUE	0.0009997	35.3898
19590_46	35368	SP-D	Pulmonary surfactant-associated protein D	SFTPD	P35247	ENSG00000133661	6441	HGNC:10803	rs118032778	A	G	0.2404	0.0231984	0.03019	10	82027636	3.662e-25	TRUE	0.00302726	107.387
19590_46	35368	SP-D	Pulmonary surfactant-associated protein D	SFTPD	P35247	ENSG00000133661	6441	HGNC:10803	rs118146691	A	G	0.1564	0.0214623	0.0365	10	81085221	3.165e-13	TRUE	0.00149928	53.1031
19590_46	35368	SP-D	Pulmonary surfactant-associated protein D	SFTPD	P35247	ENSG00000133661	6441	HGNC:10803	rs12253012	C	T	-0.1302	0.0212686	0.03752	10	82575275	9.259e-10	TRUE	0.00105851	37.475
19590_46	35366	SP-D	Pulmonary surfactant-associated protein D	SFTPD	P35247	ENSG00000133661	6441	HGNC:10803	rs12763926	A	G	0.2519	0.0137004	0.09377	10	81858677	1.692e-75	TRUE	0.00946879	338.055
19590_46	35366	SP-D	Pulmonary surfactant-associated protein D	SFTPD	P35247	ENSG00000133661	6441	HGNC:10803	rs12778583	T	C	0.248	0.0081004	0.38399	10	81787866	1e-200	TRUE	0.0258207	937.324
19590_46	35367	SP-D	Pulmonary surfactant-associated protein D	SFTPD	P35247	ENSG00000133661	6441	HGNC:10803	rs138386007	A	G	0.187	0.0335323	0.01464	10	81199445	2.451e-08	TRUE	0.000878621	31.0998
19590_46	35370	SP-D	Pulmonary surfactant-associated protein D	SFTPD	P35247	ENSG00000133661	6441	HGNC:10803	rs142561255	G	A	-0.1822	0.0260383	0.02477	10	82265914	2.608e-12	TRUE	0.00138248	48.9633
19590_46	35368	SP-D	Pulmonary surfactant-associated protein D	SFTPD	P35247	ENSG00000133661	6441	HGNC:10803	rs144224322	T	C	-0.2757	0.0225905	0.03175	10	81884472	2.951e-34	TRUE	0.00419382	148.943
19590_46	35370	SP-D	Pulmonary surfactant-associated protein D	SFTPD	P35247	ENSG00000133661	6441	HGNC:10803	rs144592833	T	C	-0.2026	0.0248771	0.02523	10	82272387	3.823e-16	TRUE	0.00187178	66.3254
19590_46	35369	SP-D	Pulmonary surfactant-associated protein D	SFTPD	P35247	ENSG00000133661	6441	HGNC:10803	rs146140883	G	A	-0.1804	0.0226131	0.03221	10	82647550	1.491e-15	TRUE	0.00179628	63.6435
19590_46	35367	SP-D	Pulmonary surfactant-associated protein D	SFTPD	P35247	ENSG00000133661	6441	HGNC:10803	rs146549805	G	A	0.1834	0.0294426	0.01862	10	81877034	4.692e-10	TRUE	0.00109597	38.8014
19590_46	35368	SP-D	Pulmonary surfactant-associated protein D	SFTPD	P35247	ENSG00000133661	6441	HGNC:10803	rs147528605	A	G	0.1389	0.0159761	0.06788	10	81902709	3.491e-18	TRUE	0.00213281	75.5901
19590_46	35367	SP-D	Pulmonary surfactant-associated protein D	SFTPD	P35247	ENSG00000133661	6441	HGNC:10803	rs148111397	C	A	0.2469	0.0341681	0.01426	10	82096772	4.973e-13	TRUE	0.0014743	52.2156
19590_46	35364	SP-D	Pulmonary surfactant-associated protein D	SFTPD	P35247	ENSG00000133661	6441	HGNC:10803	rs148491113	T	G	0.1753	0.0227924	0.0343	10	81170978	1.458e-14	TRUE	0.00167002	59.154
19590_46	35369	SP-D	Pulmonary surfactant-associated protein D	SFTPD	P35247	ENSG00000133661	6441	HGNC:10803	rs148541155	G	A	-0.1435	0.0176039	0.05363	10	82452691	3.591e-16	TRUE	0.00187531	66.4488
19590_46	35367	SP-D	Pulmonary surfactant-associated protein D	SFTPD	P35247	ENSG00000133661	6441	HGNC:10803	rs148775898	A	G	-0.1863	0.0312008	0.01717	10	81876216	2.358e-09	TRUE	0.00100712	35.6529
19590_46	35368	SP-D	Pulmonary surfactant-associated protein D	SFTPD	P35247	ENSG00000133661	6441	HGNC:10803	rs149326069	T	C	-0.2108	0.0317504	0.01569	10	81894179	3.152e-11	TRUE	0.00124485	44.0802
19590_46	35366	SP-D	Pulmonary surfactant-associated protein D	SFTPD	P35247	ENSG00000133661	6441	HGNC:10803	rs150567110	C	T	0.2349	0.0141604	0.08769	10	81553959	8.444e-62	TRUE	0.00772121	275.177
19590_46	35367	SP-D	Pulmonary surfactant-associated protein D	SFTPD	P35247	ENSG00000133661	6441	HGNC:10803	rs150885428	C	G	-0.3593	0.0222567	0.03405	10	81208451	1.262e-58	TRUE	0.00731531	260.612
19590_46	35368	SP-D	Pulmonary surfactant-associated protein D	SFTPD	P35247	ENSG00000133661	6441	HGNC:10803	rs16937080	A	T	0.0786	0.00910364	0.26902	10	81094702	5.929e-18	TRUE	0.00210336	74.5444
19590_46	35368	SP-D	Pulmonary surfactant-associated protein D	SFTPD	P35247	ENSG00000133661	6441	HGNC:10803	rs1702219	C	T	-0.0642	0.0101061	0.19906	10	82572919	2.117e-10	TRUE	0.00113978	40.3556
19590_46	35368	SP-D	Pulmonary surfactant-associated protein D	SFTPD	P35247	ENSG00000133661	6441	HGNC:10803	rs17878336	C	G	0.3168	0.0241043	0.02892	10	81702210	1.87e-39	TRUE	0.00486047	172.735
19590_46	35370	SP-D	Pulmonary surfactant-associated protein D	SFTPD	P35247	ENSG00000133661	6441	HGNC:10803	rs184137314	T	C	-0.3402	0.0286231	0.01914	10	82268016	1.408e-32	TRUE	0.00397826	141.265
19590_46	35366	SP-D	Pulmonary surfactant-associated protein D	SFTPD	P35247	ENSG00000133661	6441	HGNC:10803	rs187501697	T	C	0.3611	0.0334838	0.01401	10	81333616	4.083e-27	TRUE	0.00327791	116.301
19590_46	35365	SP-D	Pulmonary surfactant-associated protein D	SFTPD	P35247	ENSG00000133661	6441	HGNC:10803	rs188547888	T	C	-0.2729	0.0220948	0.03397	10	81249628	4.792e-35	TRUE	0.00429544	152.555
19590_46	35370	SP-D	Pulmonary surfactant-associated protein D	SFTPD	P35247	ENSG00000133661	6441	HGNC:10803	rs1911443	C	T	-0.0658	0.00843314	0.34953	10	82518513	6.067e-15	TRUE	0.00171836	60.8797
19590_46	35362	SP-D	Pulmonary surfactant-associated protein D	SFTPD	P35247	ENSG00000133661	6441	HGNC:10803	rs1913751	T	C	-0.081	0.0103602	0.81528	10	82411802	5.351e-15	TRUE	0.00172572	61.127
19590_46	35362	SP-D	Pulmonary surfactant-associated protein D	SFTPD	P35247	ENSG00000133661	6441	HGNC:10803	rs2081343	G	A	-0.1051	0.0156582	0.92662	10	82439149	1.918e-11	TRUE	0.00127249	45.0527
19590_46	35365	SP-D	Pulmonary surfactant-associated protein D	SFTPD	P35247	ENSG00000133661	6441	HGNC:10803	rs2245060	T	C	0.3289	0.00870028	0.3004	10	81639721	1e-200	TRUE	0.0388425	1429.1
19590_46	35366	SP-D	Pulmonary surfactant-associated protein D	SFTPD	P35247	ENSG00000133661	6441	HGNC:10803	rs2678637	C	T	0.1472	0.0233755	0.02933	10	81298307	3.031e-10	TRUE	0.00112007	39.6545
19590_46	35368	SP-D	Pulmonary surfactant-associated protein D	SFTPD	P35247	ENSG00000133661	6441	HGNC:10803	rs2802372	C	A	0.0846	0.0080718	0.44577	10	81047575	1.057e-25	TRUE	0.00309647	109.85
19590_46	35368	SP-D	Pulmonary surfactant-associated protein D	SFTPD	P35247	ENSG00000133661	6441	HGNC:10803	rs3000954	A	C	-0.1274	0.0109415	0.83625	10	81972386	2.468e-31	TRUE	0.00381892	135.578
19590_46	35366	SP-D	Pulmonary surfactant-associated protein D	SFTPD	P35247	ENSG00000133661	6441	HGNC:10803	rs34122417	G	A	-0.2384	0.0141448	0.08705	10	81403299	9.756e-64	TRUE	0.00796866	284.067
19590_46	35364	SP-D	Pulmonary surfactant-associated protein D	SFTPD	P35247	ENSG00000133661	6441	HGNC:10803	rs4253536	C	T	-0.4447	0.0145746	0.08161	10	81374457	1e-200	TRUE	0.0256519	930.985
19590_46	35366	SP-D	Pulmonary surfactant-associated protein D	SFTPD	P35247	ENSG00000133661	6441	HGNC:10803	rs4322338	A	G	0.234	0.0214905	0.03757	10	81397799	1.307e-27	TRUE	0.00334138	118.561
19590_46	35366	SP-D	Pulmonary surfactant-associated protein D	SFTPD	P35247	ENSG00000133661	6441	HGNC:10803	rs4933462	G	A	-0.0642	0.00814804	0.41314	10	82372612	3.295e-15	TRUE	0.00175243	62.0817
19590_46	35369	SP-D	Pulmonary surfactant-associated protein D	SFTPD	P35247	ENSG00000133661	6441	HGNC:10803	rs59577534	T	C	0.1178	0.0162661	0.06541	10	82347499	4.419e-13	TRUE	0.00148075	52.4475
19590_46	35367	SP-D	Pulmonary surfactant-associated protein D	SFTPD	P35247	ENSG00000133661	6441	HGNC:10803	rs60204118	T	C	0.0888	0.00815493	0.41399	10	82039316	1.299e-27	TRUE	0.00334162	118.573
19590_46	35366	SP-D	Pulmonary surfactant-associated protein D	SFTPD	P35247	ENSG00000133661	6441	HGNC:10803	rs60472814	C	G	-0.0917	0.0116458	0.13737	10	81077444	3.432e-15	TRUE	0.00175017	62.0015
19590_46	35368	SP-D	Pulmonary surfactant-associated protein D	SFTPD	P35247	ENSG00000133661	6441	HGNC:10803	rs61860017	A	T	0.2748	0.0170204	0.05855	10	81916367	1.224e-58	TRUE	0.0073168	260.673
19590_46	35368	SP-D	Pulmonary surfactant-associated protein D	SFTPD	P35247	ENSG00000133661	6441	HGNC:10803	rs7067644	A	G	0.1112	0.0082171	0.39476	10	81924245	1.002e-41	TRUE	0.00515161	183.135
19590_46	35369	SP-D	Pulmonary surfactant-associated protein D	SFTPD	P35247	ENSG00000133661	6441	HGNC:10803	rs7079398	A	G	0.0941	0.011962	0.12823	10	82619247	3.645e-15	TRUE	0.00174668	61.8829
19590_46	35370	SP-D	Pulmonary surfactant-associated protein D	SFTPD	P35247	ENSG00000133661	6441	HGNC:10803	rs7093808	T	A	-0.072	0.00851867	0.33643	10	82251049	2.863e-17	TRUE	0.00201574	71.4367
19590_46	35365	SP-D	Pulmonary surfactant-associated protein D	SFTPD	P35247	ENSG00000133661	6441	HGNC:10803	rs7099570	C	T	0.1271	0.00807976	0.56437	10	81843020	9.322e-56	TRUE	0.00694891	247.454
19590_46	35370	SP-D	Pulmonary surfactant-associated protein D	SFTPD	P35247	ENSG00000133661	6441	HGNC:10803	rs71479646	C	A	-0.1462	0.0182207	0.05115	10	80768652	1.025e-15	TRUE	0.00181703	64.3818
19590_46	35371	SP-D	Pulmonary surfactant-associated protein D	SFTPD	P35247	ENSG00000133661	6441	HGNC:10803	rs72805780	T	G	-0.1387	0.0183714	0.05147	10	82474784	4.36e-14	TRUE	0.00160896	56.9992
19590_46	35368	SP-D	Pulmonary surfactant-associated protein D	SFTPD	P35247	ENSG00000133661	6441	HGNC:10803	rs72807976	C	T	-0.1109	0.0195698	0.04334	10	81933050	1.454e-08	TRUE	0.000907218	32.1138
19590_46	35368	SP-D	Pulmonary surfactant-associated protein D	SFTPD	P35247	ENSG00000133661	6441	HGNC:10803	rs72818290	A	T	0.1111	0.016369	0.06353	10	81144404	1.143e-11	TRUE	0.00130087	46.0666
19590_46	35368	SP-D	Pulmonary surfactant-associated protein D	SFTPD	P35247	ENSG00000133661	6441	HGNC:10803	rs73299582	T	C	0.1567	0.0167558	0.06067	10	82024216	8.604e-21	TRUE	0.00246687	87.4591
19590_46	35368	SP-D	Pulmonary surfactant-associated protein D	SFTPD	P35247	ENSG00000133661	6441	HGNC:10803	rs75037347	T	C	-0.8159	0.0221463	0.03372	10	81642409	1e-200	TRUE	0.0369597	1357.28
19590_46	35364	SP-D	Pulmonary surfactant-associated protein D	SFTPD	P35247	ENSG00000133661	6441	HGNC:10803	rs75714675	G	A	0.2798	0.0132971	0.10319	10	81248508	2.697e-98	TRUE	0.0123663	442.773
19590_46	35368	SP-D	Pulmonary surfactant-associated protein D	SFTPD	P35247	ENSG00000133661	6441	HGNC:10803	rs76146536	C	T	-0.1158	0.018529	0.05048	10	81692989	4.113e-10	TRUE	0.00110319	39.0585
19590_46	35370	SP-D	Pulmonary surfactant-associated protein D	SFTPD	P35247	ENSG00000133661	6441	HGNC:10803	rs76184639	T	G	-0.1475	0.0222847	0.03396	10	80829483	3.619e-11	TRUE	0.00123715	43.8097
19590_46	35368	SP-D	Pulmonary surfactant-associated protein D	SFTPD	P35247	ENSG00000133661	6441	HGNC:10803	rs77010722	C	T	0.1476	0.0199364	0.04351	10	81711561	1.326e-13	TRUE	0.00154746	54.8124
19590_46	35366	SP-D	Pulmonary surfactant-associated protein D	SFTPD	P35247	ENSG00000133661	6441	HGNC:10803	rs77168152	C	T	-0.2078	0.0157207	0.06971	10	81798658	6.886e-40	TRUE	0.00491638	174.722
19590_46	35369	SP-D	Pulmonary surfactant-associated protein D	SFTPD	P35247	ENSG00000133661	6441	HGNC:10803	rs77745801	A	G	-0.2825	0.0236788	0.03012	10	82355312	8.207e-33	TRUE	0.00400844	142.337
19590_46	35369	SP-D	Pulmonary surfactant-associated protein D	SFTPD	P35247	ENSG00000133661	6441	HGNC:10803	rs77936468	A	G	-0.1779	0.024879	0.02539	10	80978925	8.64e-13	TRUE	0.00144364	51.1311
19590_46	35368	SP-D	Pulmonary surfactant-associated protein D	SFTPD	P35247	ENSG00000133661	6441	HGNC:10803	rs779933	A	G	-0.0589	0.00804806	0.46637	10	80918517	2.507e-13	TRUE	0.00151218	53.5609
19590_46	35369	SP-D	Pulmonary surfactant-associated protein D	SFTPD	P35247	ENSG00000133661	6441	HGNC:10803	rs78227559	A	G	-0.095	0.017259	0.0578	10	82352813	3.705e-08	TRUE	0.000855942	30.298
19590_46	35366	SP-D	Pulmonary surfactant-associated protein D	SFTPD	P35247	ENSG00000133661	6441	HGNC:10803	rs7893619	G	C	-0.1445	0.0114897	0.14115	10	81198221	2.845e-36	TRUE	0.00445264	158.167
19590_46	35367	SP-D	Pulmonary surfactant-associated protein D	SFTPD	P35247	ENSG00000133661	6441	HGNC:10803	rs78943967	T	A	-0.1696	0.0236149	0.02904	10	81765322	6.874e-13	TRUE	0.00145638	51.58
19590_46	35360	SP-D	Pulmonary surfactant-associated protein D	SFTPD	P35247	ENSG00000133661	6441	HGNC:10803	rs7904536	C	A	-0.0495	0.00838316	0.35851	10	82424127	3.533e-09	TRUE	0.000985097	34.8654
19590_46	35364	SP-D	Pulmonary surfactant-associated protein D	SFTPD	P35247	ENSG00000133661	6441	HGNC:10803	rs7909698	C	T	-0.0666	0.00938597	0.24382	10	81227956	1.287e-12	TRUE	0.00142179	50.3489
19590_46	35369	SP-D	Pulmonary surfactant-associated protein D	SFTPD	P35247	ENSG00000133661	6441	HGNC:10803	rs79300793	T	C	0.0788	0.0136925	0.09416	10	80836314	8.665e-09	TRUE	0.000935586	33.1198
9314_9	35360	PSG5	Pregnancy-specific beta-1-glycoprotein 5	PSG5	Q15238	ENSG00000204941	5673	HGNC:9522	rs111712264	G	T	-0.2515	0.0168879	0.06578	19	43848005	3.695e-50	TRUE	0.00623338	221.782
9314_9	35365	PSG5	Pregnancy-specific beta-1-glycoprotein 5	PSG5	Q15238	ENSG00000204941	5673	HGNC:9522	rs112659494	T	C	-0.2341	0.0355222	0.01361	19	43423655	4.391e-11	TRUE	0.00122665	43.4313
9314_9	35358	PSG5	Pregnancy-specific beta-1-glycoprotein 5	PSG5	Q15238	ENSG00000204941	5673	HGNC:9522	rs113094109	A	G	-0.1276	0.0183163	0.05335	19	43865802	3.25e-12	TRUE	0.00137078	48.5317
9314_9	35367	PSG5	Pregnancy-specific beta-1-glycoprotein 5	PSG5	Q15238	ENSG00000204941	5673	HGNC:9522	rs11669095	T	A	0.1003	0.0121646	0.13321	19	44177666	1.648e-16	TRUE	0.00191867	67.9843
9314_9	35368	PSG5	Pregnancy-specific beta-1-glycoprotein 5	PSG5	Q15238	ENSG00000204941	5673	HGNC:9522	rs11669863	T	A	-0.134	0.0196049	0.04702	19	43977780	8.2e-12	TRUE	0.00131923	46.7173
9314_9	35362	PSG5	Pregnancy-specific beta-1-glycoprotein 5	PSG5	Q15238	ENSG00000204941	5673	HGNC:9522	rs117498036	G	A	-0.1199	0.0204846	0.04306	19	43933888	4.823e-09	TRUE	0.000967941	34.2596
9314_9	35369	PSG5	Pregnancy-specific beta-1-glycoprotein 5	PSG5	Q15238	ENSG00000204941	5673	HGNC:9522	rs117813514	A	G	0.1453	0.0232614	0.03325	19	42727325	4.2e-10	TRUE	0.00110201	39.0176
9314_9	35368	PSG5	Pregnancy-specific beta-1-glycoprotein 5	PSG5	Q15238	ENSG00000204941	5673	HGNC:9522	rs117905210	A	G	0.0924	0.0162249	0.06905	19	44286253	1.234e-08	TRUE	0.000916215	32.4326
9314_9	35364	PSG5	Pregnancy-specific beta-1-glycoprotein 5	PSG5	Q15238	ENSG00000204941	5673	HGNC:9522	rs12462137	A	C	0.24	0.0122748	0.12737	19	43895841	3.952e-85	TRUE	0.0106951	382.288
9314_9	35370	PSG5	Pregnancy-specific beta-1-glycoprotein 5	PSG5	Q15238	ENSG00000204941	5673	HGNC:9522	rs12610552	A	G	0.077	0.0138118	0.09961	19	44628205	2.476e-08	TRUE	0.000877991	31.0801
9314_9	35371	PSG5	Pregnancy-specific beta-1-glycoprotein 5	PSG5	Q15238	ENSG00000204941	5673	HGNC:9522	rs138082872	T	C	0.2709	0.0342792	0.01442	19	44344058	2.728e-15	TRUE	0.00176266	62.4536
9314_9	35366	PSG5	Pregnancy-specific beta-1-glycoprotein 5	PSG5	Q15238	ENSG00000204941	5673	HGNC:9522	rs138605473	T	G	0.3423	0.0292767	0.02091	19	43355653	1.402e-31	TRUE	0.00385065	136.701
9314_9	35365	PSG5	Pregnancy-specific beta-1-glycoprotein 5	PSG5	Q15238	ENSG00000204941	5673	HGNC:9522	rs140168895	G	A	0.5906	0.0289058	0.02011	19	43666852	8.709e-93	TRUE	0.0116673	417.462
9314_9	35367	PSG5	Pregnancy-specific beta-1-glycoprotein 5	PSG5	Q15238	ENSG00000204941	5673	HGNC:9522	rs141116769	G	C	-0.1265	0.0216387	0.03814	19	44168134	5.035e-09	TRUE	0.000965442	34.1758
9314_9	35365	PSG5	Pregnancy-specific beta-1-glycoprotein 5	PSG5	Q15238	ENSG00000204941	5673	HGNC:9522	rs141306577	C	G	0.2599	0.0407099	0.01077	19	43731099	1.723e-10	TRUE	0.00115123	40.758
9314_9	35365	PSG5	Pregnancy-specific beta-1-glycoprotein 5	PSG5	Q15238	ENSG00000204941	5673	HGNC:9522	rs141659491	T	C	-0.1768	0.0291085	0.02132	19	43485849	1.249e-09	TRUE	0.00104213	36.8913
9314_9	35367	PSG5	Pregnancy-specific beta-1-glycoprotein 5	PSG5	Q15238	ENSG00000204941	5673	HGNC:9522	rs141987172	A	G	-0.1104	0.0199065	0.04335	19	44189439	2.924e-08	TRUE	0.000868955	30.7573
9314_9	35362	PSG5	Pregnancy-specific beta-1-glycoprotein 5	PSG5	Q15238	ENSG00000204941	5673	HGNC:9522	rs142399727	T	C	0.2085	0.0337475	0.01505	19	43943687	6.482e-10	TRUE	0.00107832	38.1707
9314_9	35365	PSG5	Pregnancy-specific beta-1-glycoprotein 5	PSG5	Q15238	ENSG00000204941	5673	HGNC:9522	rs143112167	A	G	0.2283	0.0341507	0.0147	19	43579341	2.308e-11	TRUE	0.00126216	44.6903
9314_9	35365	PSG5	Pregnancy-specific beta-1-glycoprotein 5	PSG5	Q15238	ENSG00000204941	5673	HGNC:9522	rs144764562	A	G	-0.1728	0.0294279	0.02049	19	43539305	4.306e-09	TRUE	0.000974087	34.4802
9314_9	35365	PSG5	Pregnancy-specific beta-1-glycoprotein 5	PSG5	Q15238	ENSG00000204941	5673	HGNC:9522	rs148165098	C	G	-0.1345	0.0201156	0.04461	19	43461041	2.288e-11	TRUE	0.00126264	44.7073
9314_9	35373	PSG5	Pregnancy-specific beta-1-glycoprotein 5	PSG5	Q15238	ENSG00000204941	5673	HGNC:9522	rs148876440	C	T	0.157	0.0226862	0.03479	19	44016280	4.5e-12	TRUE	0.0013522	47.8935
9314_9	35365	PSG5	Pregnancy-specific beta-1-glycoprotein 5	PSG5	Q15238	ENSG00000204941	5673	HGNC:9522	rs150695317	T	C	0.3853	0.0383667	0.01214	19	43588503	9.907e-24	TRUE	0.00284383	100.853
9314_9	35364	PSG5	Pregnancy-specific beta-1-glycoprotein 5	PSG5	Q15238	ENSG00000204941	5673	HGNC:9522	rs16976477	A	G	0.1351	0.0218475	0.03664	19	43909089	6.259e-10	TRUE	0.00108019	38.239
9314_9	35371	PSG5	Pregnancy-specific beta-1-glycoprotein 5	PSG5	Q15238	ENSG00000204941	5673	HGNC:9522	rs17656836	A	G	-0.211	0.0228608	0.03418	19	44556291	2.712e-20	TRUE	0.00240278	85.1888
9314_9	35364	PSG5	Pregnancy-specific beta-1-glycoprotein 5	PSG5	Q15238	ENSG00000204941	5673	HGNC:9522	rs3179010	A	G	0.0861	0.00856818	0.36992	19	43773626	9.299e-24	TRUE	0.00284743	100.978
9314_9	35372	PSG5	Pregnancy-specific beta-1-glycoprotein 5	PSG5	Q15238	ENSG00000204941	5673	HGNC:9522	rs3213387	C	T	0.0772	0.0104017	0.19604	19	44052616	1.155e-13	TRUE	0.00155494	55.0838
9314_9	35365	PSG5	Pregnancy-specific beta-1-glycoprotein 5	PSG5	Q15238	ENSG00000204941	5673	HGNC:9522	rs35916359	A	C	-0.2409	0.0203552	0.04469	19	43629962	2.58e-32	TRUE	0.00394507	140.062
9314_9	35370	PSG5	Pregnancy-specific beta-1-glycoprotein 5	PSG5	Q15238	ENSG00000204941	5673	HGNC:9522	rs396497	T	A	-0.0616	0.00928568	0.27248	19	44494430	3.27e-11	TRUE	0.00124275	44.0082
9314_9	35370	PSG5	Pregnancy-specific beta-1-glycoprotein 5	PSG5	Q15238	ENSG00000204941	5673	HGNC:9522	rs397133	G	A	-0.1879	0.0230622	0.96736	19	44487889	3.714e-16	TRUE	0.00187339	66.3824
9314_9	35370	PSG5	Pregnancy-specific beta-1-glycoprotein 5	PSG5	Q15238	ENSG00000204941	5673	HGNC:9522	rs45572931	T	C	-0.1222	0.0178055	0.05813	19	42724483	6.74e-12	TRUE	0.00132999	47.1016
9314_9	35371	PSG5	Pregnancy-specific beta-1-glycoprotein 5	PSG5	Q15238	ENSG00000204941	5673	HGNC:9522	rs458647	T	C	-0.1056	0.0114884	0.84701	19	44477776	3.86e-20	TRUE	0.00238315	84.4908
9314_9	35356	PSG5	Pregnancy-specific beta-1-glycoprotein 5	PSG5	Q15238	ENSG00000204941	5673	HGNC:9522	rs4803617	A	G	0.0784	0.00881848	0.66946	19	43867658	6.088e-19	TRUE	0.00223067	79.0395
9314_9	35359	PSG5	Pregnancy-specific beta-1-glycoprotein 5	PSG5	Q15238	ENSG00000204941	5673	HGNC:9522	rs56084866	C	T	0.3733	0.0136644	0.10068	19	43853746	2.518e-164	TRUE	0.0206721	746.332
9314_9	35365	PSG5	Pregnancy-specific beta-1-glycoprotein 5	PSG5	Q15238	ENSG00000204941	5673	HGNC:9522	rs60924103	G	C	-0.2393	0.0272647	0.02395	19	43723726	1.68e-18	TRUE	0.00217366	77.0345
9314_9	35370	PSG5	Pregnancy-specific beta-1-glycoprotein 5	PSG5	Q15238	ENSG00000204941	5673	HGNC:9522	rs61088131	C	T	0.1044	0.0108428	0.17525	19	42700947	6.062e-22	TRUE	0.00261438	92.7076
9314_9	35372	PSG5	Pregnancy-specific beta-1-glycoprotein 5	PSG5	Q15238	ENSG00000204941	5673	HGNC:9522	rs62114647	T	C	0.1193	0.0119314	0.13899	19	44401670	1.542e-23	TRUE	0.00281863	99.9767
9314_9	35364	PSG5	Pregnancy-specific beta-1-glycoprotein 5	PSG5	Q15238	ENSG00000204941	5673	HGNC:9522	rs66774479	A	G	0.2009	0.00944561	0.26306	19	43876931	2.193e-100	TRUE	0.0126311	452.376
9314_9	35365	PSG5	Pregnancy-specific beta-1-glycoprotein 5	PSG5	Q15238	ENSG00000204941	5673	HGNC:9522	rs7258539	C	T	-0.2889	0.0204807	0.0429	19	43565940	3.491e-45	TRUE	0.00559523	198.978
9314_9	35369	PSG5	Pregnancy-specific beta-1-glycoprotein 5	PSG5	Q15238	ENSG00000204941	5673	HGNC:9522	rs73033434	A	G	-0.1315	0.0176132	0.05986	19	42861475	8.267e-14	TRUE	0.0015736	55.7411
9314_9	35361	PSG5	Pregnancy-specific beta-1-glycoprotein 5	PSG5	Q15238	ENSG00000204941	5673	HGNC:9522	rs73041544	A	G	0.1508	0.0213771	0.04067	19	43916804	1.735e-12	TRUE	0.00140538	49.7628
9314_9	35368	PSG5	Pregnancy-specific beta-1-glycoprotein 5	PSG5	Q15238	ENSG00000204941	5673	HGNC:9522	rs75281511	C	G	0.4616	0.0338871	0.01485	19	43059040	2.976e-42	TRUE	0.00521919	185.55
9314_9	35360	PSG5	Pregnancy-specific beta-1-glycoprotein 5	PSG5	Q15238	ENSG00000204941	5673	HGNC:9522	rs78718189	A	G	-0.2281	0.0142424	0.09556	19	43866449	9.958e-58	TRUE	0.00720203	256.497
9314_9	35368	PSG5	Pregnancy-specific beta-1-glycoprotein 5	PSG5	Q15238	ENSG00000204941	5673	HGNC:9522	rs78813119	T	G	0.1233	0.0185179	0.05431	19	42896139	2.768e-11	TRUE	0.00125202	44.3345
15384_15	35364	KLOTHO	Klotho	KL	Q9UEF7	ENSG00000133116	9365	HGNC:6344	rs10467359	G	A	-0.3185	0.0208079	0.04031	13	33529264	6.897e-53	TRUE	0.00658201	234.295
15384_15	35361	KLOTHO	Klotho	KL	Q9UEF7	ENSG00000133116	9365	HGNC:6344	rs117076445	A	G	-0.2048	0.0371256	0.0132	13	34334191	3.46e-08	TRUE	0.000859882	30.4307
15384_15	35361	KLOTHO	Klotho	KL	Q9UEF7	ENSG00000133116	9365	HGNC:6344	rs117469833	G	A	0.1337	0.0233914	0.03184	13	33774338	1.092e-08	TRUE	0.000923104	32.6702
15384_15	35366	KLOTHO	Klotho	KL	Q9UEF7	ENSG00000133116	9365	HGNC:6344	rs1207950	A	G	-0.0979	0.0175569	0.05983	13	33008783	2.459e-08	TRUE	0.000878468	31.0934
15384_15	35363	KLOTHO	Klotho	KL	Q9UEF7	ENSG00000133116	9365	HGNC:6344	rs12429937	T	A	0.0859	0.0101428	0.22153	13	33571753	2.474e-17	TRUE	0.00202425	71.7248
15384_15	35363	KLOTHO	Klotho	KL	Q9UEF7	ENSG00000133116	9365	HGNC:6344	rs138916294	C	T	0.1726	0.0254282	0.02775	13	33629260	1.139e-11	TRUE	0.00130125	46.0735
15384_15	35367	KLOTHO	Klotho	KL	Q9UEF7	ENSG00000133116	9365	HGNC:6344	rs143423393	G	A	0.197	0.0281854	0.02301	13	33176686	2.76e-12	TRUE	0.00137946	48.8522
15384_15	35357	KLOTHO	Klotho	KL	Q9UEF7	ENSG00000133116	9365	HGNC:6344	rs17079080	T	G	0.1469	0.0258662	0.02632	13	33981532	1.353e-08	TRUE	0.000911449	32.2537
15384_15	35362	KLOTHO	Klotho	KL	Q9UEF7	ENSG00000133116	9365	HGNC:6344	rs17596279	C	T	-0.116	0.0102752	0.21268	13	33667289	1.481e-29	TRUE	0.0035914	127.45
15384_15	35365	KLOTHO	Klotho	KL	Q9UEF7	ENSG00000133116	9365	HGNC:6344	rs191924	G	T	0.074	0.0129709	0.88249	13	33491057	1.163e-08	TRUE	0.000919543	32.5477
15384_15	35369	KLOTHO	Klotho	KL	Q9UEF7	ENSG00000133116	9365	HGNC:6344	rs206079	A	G	-0.053	0.00846349	0.46022	13	32920618	3.796e-10	TRUE	0.00110758	39.2151
15384_15	35367	KLOTHO	Klotho	KL	Q9UEF7	ENSG00000133116	9365	HGNC:6344	rs55880225	C	T	0.0523	0.00843456	0.44027	13	33190870	5.622e-10	TRUE	0.00108601	38.4484
15384_15	35363	KLOTHO	Klotho	KL	Q9UEF7	ENSG00000133116	9365	HGNC:6344	rs575536	C	T	0.057	0.0096188	0.74441	13	33592777	3.106e-09	TRUE	0.000992093	35.1162
15384_15	35361	KLOTHO	Klotho	KL	Q9UEF7	ENSG00000133116	9365	HGNC:6344	rs617875	C	T	-0.079	0.00837188	0.46742	13	33720920	3.86e-21	TRUE	0.00251198	89.0447
15384_15	35363	KLOTHO	Klotho	KL	Q9UEF7	ENSG00000133116	9365	HGNC:6344	rs73176817	C	T	0.2011	0.0133921	0.10778	13	33592313	5.74e-51	TRUE	0.0063364	225.49
15384_15	35361	KLOTHO	Klotho	KL	Q9UEF7	ENSG00000133116	9365	HGNC:6344	rs73179006	T	G	0.1632	0.019098	0.04953	13	33733305	1.281e-17	TRUE	0.00206095	73.0237
15384_15	35360	KLOTHO	Klotho	KL	Q9UEF7	ENSG00000133116	9365	HGNC:6344	rs75164608	C	G	-0.125	0.0189157	0.05417	13	34327438	3.888e-11	TRUE	0.00123354	43.6694
15384_15	35367	KLOTHO	Klotho	KL	Q9UEF7	ENSG00000133116	9365	HGNC:6344	rs79432248	G	A	-0.1896	0.0275641	0.02274	13	33192474	6.048e-12	TRUE	0.00133609	47.314
15384_15	35363	KLOTHO	Klotho	KL	Q9UEF7	ENSG00000133116	9365	HGNC:6344	rs9526848	C	T	-0.1272	0.0138077	0.10192	13	33561674	3.194e-20	TRUE	0.00239422	84.8653
15384_15	35363	KLOTHO	Klotho	KL	Q9UEF7	ENSG00000133116	9365	HGNC:6344	rs9536282	T	C	0.1411	0.0109444	0.17926	13	33617662	4.968e-38	TRUE	0.00467849	166.214
15384_15	35360	KLOTHO	Klotho	KL	Q9UEF7	ENSG00000133116	9365	HGNC:6344	rs9536928	A	C	-0.1041	0.0162677	0.07193	13	33836313	1.562e-10	TRUE	0.0011568	40.9497
15384_15	35361	KLOTHO	Klotho	KL	Q9UEF7	ENSG00000133116	9365	HGNC:6344	rs9596933	A	G	-0.0676	0.012171	0.14007	13	33767700	2.789e-08	TRUE	0.000871692	30.849
4979_34	35361	DERM	Dermatopontin	DPT	Q07507	ENSG00000143196	1805	HGNC:3011	rs10489372	T	G	0.1022	0.00886253	0.3515	1	168933468	9.133e-31	TRUE	0.00374676	132.98
4979_34	35364	DERM	Dermatopontin	DPT	Q07507	ENSG00000143196	1805	HGNC:3011	rs10918912	A	G	0.1173	0.013612	0.10832	1	168475194	6.849e-18	TRUE	0.00209558	74.2596
4979_34	35361	DERM	Dermatopontin	DPT	Q07507	ENSG00000143196	1805	HGNC:3011	rs10918983	T	A	-0.1436	0.0095875	0.26233	1	168744052	1.025e-50	TRUE	0.00630451	224.336
4979_34	35364	DERM	Dermatopontin	DPT	Q07507	ENSG00000143196	1805	HGNC:3011	rs111307211	G	A	-0.2754	0.0177746	0.05805	1	168510799	3.808e-54	TRUE	0.00674299	240.064
4979_34	35361	DERM	Dermatopontin	DPT	Q07507	ENSG00000143196	1805	HGNC:3011	rs112760232	C	T	0.227	0.0227112	0.03482	1	168751423	1.602e-23	TRUE	0.00281738	99.9011
4979_34	35366	DERM	Dermatopontin	DPT	Q07507	ENSG00000143196	1805	HGNC:3011	rs115049784	T	C	0.1059	0.0170575	0.06619	1	167820710	5.352e-10	TRUE	0.00108875	38.5445
4979_34	35361	DERM	Dermatopontin	DPT	Q07507	ENSG00000143196	1805	HGNC:3011	rs11578708	T	C	0.0549	0.0100325	0.23065	1	169056945	4.444e-08	TRUE	0.000846178	29.9453
4979_34	35361	DERM	Dermatopontin	DPT	Q07507	ENSG00000143196	1805	HGNC:3011	rs11582358	T	A	0.1818	0.0110551	0.17947	1	168759044	9.132e-61	TRUE	0.00759015	270.433
4979_34	35362	DERM	Dermatopontin	DPT	Q07507	ENSG00000143196	1805	HGNC:3011	rs11591169	A	G	0.4007	0.0402387	0.01056	1	168658095	2.325e-23	TRUE	0.00279655	99.1634
4979_34	35361	DERM	Dermatopontin	DPT	Q07507	ENSG00000143196	1805	HGNC:3011	rs115977231	A	G	-0.1891	0.0302081	0.01907	1	169066729	3.852e-10	TRUE	0.00110702	39.1865
4979_34	35361	DERM	Dermatopontin	DPT	Q07507	ENSG00000143196	1805	HGNC:3011	rs11807589	G	T	-0.2073	0.0105311	0.19949	1	168910813	2.927e-86	TRUE	0.0108397	387.48
4979_34	35362	DERM	Dermatopontin	DPT	Q07507	ENSG00000143196	1805	HGNC:3011	rs1200118	G	A	-0.086	0.010618	0.19438	1	169064630	5.522e-16	TRUE	0.00185179	65.6007
4979_34	35362	DERM	Dermatopontin	DPT	Q07507	ENSG00000143196	1805	HGNC:3011	rs12031076	C	G	0.0753	0.0103374	0.20824	1	168612651	3.235e-13	TRUE	0.00149832	53.0601
4979_34	35360	DERM	Dermatopontin	DPT	Q07507	ENSG00000143196	1805	HGNC:3011	rs12032741	G	A	-0.2725	0.0267139	0.02444	1	168889175	1.969e-24	TRUE	0.00293423	104.054
4979_34	35357	DERM	Dermatopontin	DPT	Q07507	ENSG00000143196	1805	HGNC:3011	rs12145436	A	G	-0.1275	0.0170776	0.06717	1	168408546	8.272e-14	TRUE	0.0015741	55.74
4979_34	35356	DERM	Dermatopontin	DPT	Q07507	ENSG00000143196	1805	HGNC:3011	rs12740293	G	A	-0.0779	0.0122195	0.14058	1	168381150	1.829e-10	TRUE	0.00114823	40.6413
4979_34	35362	DERM	Dermatopontin	DPT	Q07507	ENSG00000143196	1805	HGNC:3011	rs12744295	A	G	-0.1724	0.0183752	0.05627	1	168625055	6.461e-21	TRUE	0.00248323	88.0257
4979_34	35360	DERM	Dermatopontin	DPT	Q07507	ENSG00000143196	1805	HGNC:3011	rs12760914	A	C	-0.1395	0.0162222	0.07353	1	168870651	8.017e-18	TRUE	0.00208707	73.9488
4979_34	35360	DERM	Dermatopontin	DPT	Q07507	ENSG00000143196	1805	HGNC:3011	rs1322492	A	G	-0.0563	0.00874723	0.63116	1	168984148	1.224e-10	TRUE	0.00117025	41.4263
4979_34	35355	DERM	Dermatopontin	DPT	Q07507	ENSG00000143196	1805	HGNC:3011	rs1359106	A	G	-0.0764	0.0101847	0.2176	1	168348098	6.312e-14	TRUE	0.00158918	56.2716
4979_34	35361	DERM	Dermatopontin	DPT	Q07507	ENSG00000143196	1805	HGNC:3011	rs138495820	C	G	-0.2795	0.0355251	0.01456	1	168806520	3.613e-15	TRUE	0.00174756	61.9003
4979_34	35362	DERM	Dermatopontin	DPT	Q07507	ENSG00000143196	1805	HGNC:3011	rs139039879	T	G	-0.7629	0.0271851	0.02398	1	168696289	2.76e-173	TRUE	0.0217868	787.541
4979_34	35362	DERM	Dermatopontin	DPT	Q07507	ENSG00000143196	1805	HGNC:3011	rs1412337	A	G	-0.0805	0.00996461	0.23375	1	168618641	6.552e-16	TRUE	0.00184229	65.2636
4979_34	35361	DERM	Dermatopontin	DPT	Q07507	ENSG00000143196	1805	HGNC:3011	rs141588269	T	C	0.3798	0.0262806	0.02614	1	168812781	2.445e-47	TRUE	0.00587194	208.852
4979_34	35361	DERM	Dermatopontin	DPT	Q07507	ENSG00000143196	1805	HGNC:3011	rs143653370	C	T	0.3269	0.0379771	0.01205	1	169019776	7.446e-18	TRUE	0.00209111	74.0946
4979_34	35361	DERM	Dermatopontin	DPT	Q07507	ENSG00000143196	1805	HGNC:3011	rs145035576	C	A	-0.1677	0.0254121	0.02952	1	168444764	4.133e-11	TRUE	0.00123013	43.5498
4979_34	35360	DERM	Dermatopontin	DPT	Q07507	ENSG00000143196	1805	HGNC:3011	rs146249722	A	T	0.2346	0.0335837	0.0156	1	168884402	2.838e-12	TRUE	0.0013782	48.7975
4979_34	35362	DERM	Dermatopontin	DPT	Q07507	ENSG00000143196	1805	HGNC:3011	rs146379341	A	G	0.2178	0.0330951	0.0158	1	168653059	4.672e-11	TRUE	0.00122333	43.31
4979_34	35362	DERM	Dermatopontin	DPT	Q07507	ENSG00000143196	1805	HGNC:3011	rs183163332	T	C	-0.4228	0.0397373	0.0117	1	169638236	1.944e-26	TRUE	0.00319133	113.207
4979_34	35364	DERM	Dermatopontin	DPT	Q07507	ENSG00000143196	1805	HGNC:3011	rs1890129	T	C	0.0603	0.00927564	0.29695	1	167672809	7.984e-11	TRUE	0.00119369	42.2617
4979_34	35362	DERM	Dermatopontin	DPT	Q07507	ENSG00000143196	1805	HGNC:3011	rs192061034	T	C	-0.2615	0.0237163	0.03245	1	168702779	2.857e-28	TRUE	0.00342648	121.577
4979_34	35364	DERM	Dermatopontin	DPT	Q07507	ENSG00000143196	1805	HGNC:3011	rs1933107	G	A	-0.0739	0.00842197	0.50995	1	168524895	1.714e-18	TRUE	0.0021726	76.9949
4979_34	35362	DERM	Dermatopontin	DPT	Q07507	ENSG00000143196	1805	HGNC:3011	rs1933116	C	T	0.1436	0.0172424	0.93686	1	168619548	8.199e-17	TRUE	0.00195773	69.3611
4979_34	35362	DERM	Dermatopontin	DPT	Q07507	ENSG00000143196	1805	HGNC:3011	rs35449613	T	C	-0.1987	0.0145977	0.0934	1	168683476	3.41e-42	TRUE	0.0052125	185.28
4979_34	35367	DERM	Dermatopontin	DPT	Q07507	ENSG00000143196	1805	HGNC:3011	rs35514383	T	C	-0.0591	0.010653	0.19109	1	167872017	2.894e-08	TRUE	0.00086952	30.7773
4979_34	35352	DERM	Dermatopontin	DPT	Q07507	ENSG00000143196	1805	HGNC:3011	rs3917739	T	C	-0.0562	0.00897875	0.66485	1	169579378	3.869e-10	TRUE	0.00110706	39.1779
4979_34	35360	DERM	Dermatopontin	DPT	Q07507	ENSG00000143196	1805	HGNC:3011	rs41271743	G	A	0.2328	0.0209853	0.04244	1	168873915	1.349e-28	TRUE	0.00346849	123.066
4979_34	35361	DERM	Dermatopontin	DPT	Q07507	ENSG00000143196	1805	HGNC:3011	rs4656634	C	T	-0.0469	0.00845206	0.46126	1	168956295	2.874e-08	TRUE	0.000870047	30.7908
4979_34	35361	DERM	Dermatopontin	DPT	Q07507	ENSG00000143196	1805	HGNC:3011	rs5005856	G	A	0.0637	0.00850893	0.46225	1	169002381	7.087e-14	TRUE	0.00158249	56.0439
4979_34	35362	DERM	Dermatopontin	DPT	Q07507	ENSG00000143196	1805	HGNC:3011	rs531844	T	C	0.1956	0.0297122	0.9792	1	168676157	4.606e-11	TRUE	0.00122412	43.3378
4979_34	35361	DERM	Dermatopontin	DPT	Q07507	ENSG00000143196	1805	HGNC:3011	rs56197205	G	A	0.1376	0.0173821	0.06269	1	168837651	2.449e-15	TRUE	0.00176914	62.6661
4979_34	35362	DERM	Dermatopontin	DPT	Q07507	ENSG00000143196	1805	HGNC:3011	rs56324303	C	G	0.1626	0.0150396	0.08425	1	168676947	3.039e-27	TRUE	0.00329474	116.887
4979_34	35362	DERM	Dermatopontin	DPT	Q07507	ENSG00000143196	1805	HGNC:3011	rs567067	C	G	0.3433	0.00941428	0.73786	1	168696549	1e-200	TRUE	0.0362434	1329.76
4979_34	35362	DERM	Dermatopontin	DPT	Q07507	ENSG00000143196	1805	HGNC:3011	rs580360	T	C	-0.2722	0.00832901	0.49366	1	168667426	1e-200	TRUE	0.0293193	1068.05
4979_34	35362	DERM	Dermatopontin	DPT	Q07507	ENSG00000143196	1805	HGNC:3011	rs58620990	C	G	-0.0691	0.00880752	0.35361	1	168652905	4.31e-15	TRUE	0.00173773	61.5529
4979_34	35361	DERM	Dermatopontin	DPT	Q07507	ENSG00000143196	1805	HGNC:3011	rs60239376	T	C	-0.1042	0.0141132	0.09858	1	169005245	1.546e-13	TRUE	0.00153926	54.5107
4979_34	35362	DERM	Dermatopontin	DPT	Q07507	ENSG00000143196	1805	HGNC:3011	rs61802612	T	C	0.1927	0.0286891	0.0211	1	168590668	1.857e-11	TRUE	0.00127428	45.116
4979_34	35361	DERM	Dermatopontin	DPT	Q07507	ENSG00000143196	1805	HGNC:3011	rs61803293	G	A	-0.1302	0.0190243	0.05214	1	169034477	7.707e-12	TRUE	0.00132291	46.8389
4979_34	35361	DERM	Dermatopontin	DPT	Q07507	ENSG00000143196	1805	HGNC:3011	rs6675068	T	C	-0.1165	0.0084318	0.52823	1	168571198	2.02e-43	TRUE	0.00536998	190.902
4979_34	35366	DERM	Dermatopontin	DPT	Q07507	ENSG00000143196	1805	HGNC:3011	rs6677713	A	C	-0.0702	0.012186	0.14102	1	167823973	8.375e-09	TRUE	0.000937533	33.186
4979_34	35362	DERM	Dermatopontin	DPT	Q07507	ENSG00000143196	1805	HGNC:3011	rs72689237	A	C	0.3083	0.019636	0.04858	1	168663956	1.494e-55	TRUE	0.0069233	246.514
4979_34	35361	DERM	Dermatopontin	DPT	Q07507	ENSG00000143196	1805	HGNC:3011	rs72705884	A	G	-0.2519	0.0142017	0.09655	1	168567706	2.16e-70	TRUE	0.00881919	314.612
4979_34	35361	DERM	Dermatopontin	DPT	Q07507	ENSG00000143196	1805	HGNC:3011	rs73028640	T	C	0.2958	0.0221134	0.03664	1	168942578	8.299e-41	TRUE	0.00503491	178.93
4979_34	35360	DERM	Dermatopontin	DPT	Q07507	ENSG00000143196	1805	HGNC:3011	rs7544924	G	T	-0.1614	0.00836607	0.5204	1	168861060	6.245e-83	TRUE	0.0104167	372.189
4979_34	35363	DERM	Dermatopontin	DPT	Q07507	ENSG00000143196	1805	HGNC:3011	rs7553	T	G	-0.0573	0.00871647	0.36759	1	169660002	4.906e-11	TRUE	0.0012206	43.2143
4979_34	35357	DERM	Dermatopontin	DPT	Q07507	ENSG00000143196	1805	HGNC:3011	rs75645832	A	G	-0.2557	0.0408902	0.01071	1	168390818	4.018e-10	TRUE	0.00110482	39.1041
4979_34	35361	DERM	Dermatopontin	DPT	Q07507	ENSG00000143196	1805	HGNC:3011	rs75709182	A	G	-0.4549	0.0306335	0.01939	1	168934101	6.983e-50	TRUE	0.00619781	220.515
4979_34	35361	DERM	Dermatopontin	DPT	Q07507	ENSG00000143196	1805	HGNC:3011	rs75969334	G	A	-0.5249	0.0297662	0.02013	1	169026138	1.349e-69	TRUE	0.00871771	310.96
4979_34	35362	DERM	Dermatopontin	DPT	Q07507	ENSG00000143196	1805	HGNC:3011	rs75980023	T	G	0.2025	0.0192535	0.05166	1	168679050	7.171e-26	TRUE	0.00311861	110.619
4979_34	35363	DERM	Dermatopontin	DPT	Q07507	ENSG00000143196	1805	HGNC:3011	rs76095830	A	G	0.1423	0.0223252	0.03697	1	169596202	1.842e-10	TRUE	0.00114762	40.6275
4979_34	35362	DERM	Dermatopontin	DPT	Q07507	ENSG00000143196	1805	HGNC:3011	rs76529514	C	T	-0.1007	0.0131295	0.11718	1	168453791	1.723e-14	TRUE	0.00166085	58.8254
4979_34	35367	DERM	Dermatopontin	DPT	Q07507	ENSG00000143196	1805	HGNC:3011	rs76638888	C	G	-0.0762	0.0131181	0.11517	1	167761450	6.293e-09	TRUE	0.000953195	33.7419
4979_34	35363	DERM	Dermatopontin	DPT	Q07507	ENSG00000143196	1805	HGNC:3011	rs78270548	C	T	0.1486	0.0242528	0.03098	1	169416367	8.948e-10	TRUE	0.00106054	37.5417
4979_34	35362	DERM	Dermatopontin	DPT	Q07507	ENSG00000143196	1805	HGNC:3011	rs78637095	A	G	0.3804	0.0197286	0.04773	1	168704385	7.664e-83	TRUE	0.0104048	371.781
4979_34	35362	DERM	Dermatopontin	DPT	Q07507	ENSG00000143196	1805	HGNC:3011	rs79201315	C	T	0.1778	0.00997093	0.23012	1	168719957	4e-71	TRUE	0.00891235	317.975
13671_40	35309	Elastase	Neutrophil elastase	ELANE	P08246	ENSG00000277571	1991	HGNC:3309	rs10405462	C	T	-0.0625	0.00973828	0.27029	19	789454	1.381e-10	TRUE	0.00116528	41.1904
13671_40	35317	Elastase	Neutrophil elastase	ELANE	P08246	ENSG00000277571	1991	HGNC:3309	rs10409474	G	C	0.4542	0.0124497	0.13906	19	850733	1e-200	TRUE	0.0363205	1331
13671_40	35318	Elastase	Neutrophil elastase	ELANE	P08246	ENSG00000277571	1991	HGNC:3309	rs10424211	C	G	0.089	0.0112902	0.18335	19	865818	3.197e-15	TRUE	0.00175648	62.1412
13671_40	35315	Elastase	Neutrophil elastase	ELANE	P08246	ENSG00000277571	1991	HGNC:3309	rs10469327	T	C	-0.2542	0.0170583	0.92864	19	858376	3.207e-50	TRUE	0.00624916	222.064
13671_40	35320	Elastase	Neutrophil elastase	ELANE	P08246	ENSG00000277571	1991	HGNC:3309	rs11666067	A	C	0.0494	0.00879417	0.56993	19	1389517	1.939e-08	TRUE	0.000892648	31.5547
13671_40	35311	Elastase	Neutrophil elastase	ELANE	P08246	ENSG00000277571	1991	HGNC:3309	rs116838401	T	C	0.1316	0.0227001	0.03696	19	614772	6.738e-09	TRUE	0.000950949	33.609
13671_40	35315	Elastase	Neutrophil elastase	ELANE	P08246	ENSG00000277571	1991	HGNC:3309	rs116872704	T	C	0.1846	0.0318145	0.01847	19	355733	6.538e-09	TRUE	0.000952498	33.6676
13671_40	35319	Elastase	Neutrophil elastase	ELANE	P08246	ENSG00000277571	1991	HGNC:3309	rs117778730	G	T	0.2039	0.0200448	0.05015	19	1098279	2.639e-24	TRUE	0.00292129	103.474
13671_40	35311	Elastase	Neutrophil elastase	ELANE	P08246	ENSG00000277571	1991	HGNC:3309	rs117821352	A	G	0.2177	0.0191408	0.05522	19	781129	5.66e-30	TRUE	0.00365025	129.359
13671_40	35319	Elastase	Neutrophil elastase	ELANE	P08246	ENSG00000277571	1991	HGNC:3309	rs118130273	T	C	-0.2053	0.0318251	0.01867	19	886386	1.112e-10	TRUE	0.00117691	41.6139
13671_40	35316	Elastase	Neutrophil elastase	ELANE	P08246	ENSG00000277571	1991	HGNC:3309	rs12150957	C	G	-0.2202	0.00911649	0.32921	19	863892	6.773e-129	TRUE	0.0162523	583.417
13671_40	35313	Elastase	Neutrophil elastase	ELANE	P08246	ENSG00000277571	1991	HGNC:3309	rs12460415	C	T	-0.0864	0.00923113	0.3311	19	701347	8.001e-21	TRUE	0.00247475	87.6028
13671_40	35315	Elastase	Neutrophil elastase	ELANE	P08246	ENSG00000277571	1991	HGNC:3309	rs12973335	G	A	-0.0679	0.00901371	0.36521	19	684194	4.96e-14	TRUE	0.00160435	56.7456
13671_40	35308	Elastase	Neutrophil elastase	ELANE	P08246	ENSG00000277571	1991	HGNC:3309	rs12973917	T	C	-0.0529	0.00939624	0.31866	19	608563	1.803e-08	TRUE	0.000896944	31.6959
13671_40	35315	Elastase	Neutrophil elastase	ELANE	P08246	ENSG00000277571	1991	HGNC:3309	rs141399595	T	C	0.3137	0.0186704	0.05745	19	892998	2.36e-63	TRUE	0.00793101	282.307
13671_40	35318	Elastase	Neutrophil elastase	ELANE	P08246	ENSG00000277571	1991	HGNC:3309	rs142681305	C	T	0.1201	0.0189872	0.05664	19	1484773	2.527e-10	TRUE	0.00113162	40.0097
13671_40	35321	Elastase	Neutrophil elastase	ELANE	P08246	ENSG00000277571	1991	HGNC:3309	rs142963431	A	G	0.1077	0.0171118	0.06921	19	1387359	3.096e-10	TRUE	0.00112032	39.6131
13671_40	35322	Elastase	Neutrophil elastase	ELANE	P08246	ENSG00000277571	1991	HGNC:3309	rs144153164	T	G	0.2467	0.0328684	0.01659	19	1023427	6.111e-14	TRUE	0.00159246	56.3352
13671_40	35320	Elastase	Neutrophil elastase	ELANE	P08246	ENSG00000277571	1991	HGNC:3309	rs144928319	T	G	-0.1645	0.0184271	0.05925	19	1028297	4.374e-19	TRUE	0.00225135	79.6928
13671_40	35315	Elastase	Neutrophil elastase	ELANE	P08246	ENSG00000277571	1991	HGNC:3309	rs148276867	T	C	0.1214	0.0191528	0.05561	19	729756	2.32e-10	TRUE	0.00113644	40.1767
13671_40	35311	Elastase	Neutrophil elastase	ELANE	P08246	ENSG00000277571	1991	HGNC:3309	rs149074911	A	G	0.2641	0.0238386	0.03451	19	825519	1.592e-28	TRUE	0.00346405	122.737
13671_40	35322	Elastase	Neutrophil elastase	ELANE	P08246	ENSG00000277571	1991	HGNC:3309	rs149078772	C	A	-0.1294	0.0223065	0.0385	19	1038844	6.592e-09	TRUE	0.000951857	33.6516
13671_40	35314	Elastase	Neutrophil elastase	ELANE	P08246	ENSG00000277571	1991	HGNC:3309	rs150383413	G	C	0.219	0.0215789	0.04325	19	646357	3.354e-24	TRUE	0.00290833	102.999
13671_40	35322	Elastase	Neutrophil elastase	ELANE	P08246	ENSG00000277571	1991	HGNC:3309	rs186642113	A	G	0.2097	0.0340333	0.01741	19	1050343	7.201e-10	TRUE	0.00107374	37.9654
13671_40	35315	Elastase	Neutrophil elastase	ELANE	P08246	ENSG00000277571	1991	HGNC:3309	rs187211507	C	G	-0.2072	0.0287918	0.02363	19	863471	6.178e-13	TRUE	0.00146444	51.7895
13671_40	35307	Elastase	Neutrophil elastase	ELANE	P08246	ENSG00000277571	1991	HGNC:3309	rs192057249	A	G	0.1974	0.0282253	0.02519	19	589486	2.677e-12	TRUE	0.0013835	48.9121
13671_40	35313	Elastase	Neutrophil elastase	ELANE	P08246	ENSG00000277571	1991	HGNC:3309	rs193077512	T	C	-0.1879	0.0313565	0.01915	19	832854	2.068e-09	TRUE	0.00101589	35.9085
13671_40	35313	Elastase	Neutrophil elastase	ELANE	P08246	ENSG00000277571	1991	HGNC:3309	rs2074639	T	C	-0.1245	0.0113644	0.17888	19	840984	6.272e-28	TRUE	0.00338734	120.017
13671_40	35316	Elastase	Neutrophil elastase	ELANE	P08246	ENSG00000277571	1991	HGNC:3309	rs2238571	T	C	-0.0773	0.00883648	0.58191	19	930874	2.175e-18	TRUE	0.00216229	76.5245
13671_40	35316	Elastase	Neutrophil elastase	ELANE	P08246	ENSG00000277571	1991	HGNC:3309	rs2301758	G	C	0.0596	0.0101452	0.24703	19	1238676	4.236e-09	TRUE	0.000976339	34.5121
13671_40	35323	Elastase	Neutrophil elastase	ELANE	P08246	ENSG00000277571	1991	HGNC:3309	rs34593562	G	A	-0.0635	0.00888717	0.40233	19	1083556	8.991e-13	TRUE	0.00144331	51.0529
13671_40	35304	Elastase	Neutrophil elastase	ELANE	P08246	ENSG00000277571	1991	HGNC:3309	rs351103	G	A	-0.143	0.00916049	0.34109	19	820095	6.174e-55	TRUE	0.00685563	243.688
13671_40	35311	Elastase	Neutrophil elastase	ELANE	P08246	ENSG00000277571	1991	HGNC:3309	rs351984	C	T	-0.2185	0.0173175	0.93178	19	803220	1.696e-36	TRUE	0.0044884	159.195
13671_40	35310	Elastase	Neutrophil elastase	ELANE	P08246	ENSG00000277571	1991	HGNC:3309	rs351991	A	G	0.0832	0.0119701	0.15876	19	814023	3.636e-12	TRUE	0.00136642	48.3116
13671_40	35311	Elastase	Neutrophil elastase	ELANE	P08246	ENSG00000277571	1991	HGNC:3309	rs35414347	T	G	-0.0555	0.0101574	0.24383	19	634067	4.655e-08	TRUE	0.000844832	29.8554
13671_40	35323	Elastase	Neutrophil elastase	ELANE	P08246	ENSG00000277571	1991	HGNC:3309	rs35646539	T	C	0.1313	0.0129546	0.12883	19	1083532	3.847e-24	TRUE	0.00289994	102.727
13671_40	35309	Elastase	Neutrophil elastase	ELANE	P08246	ENSG00000277571	1991	HGNC:3309	rs3746172	C	A	-0.0898	0.0142752	0.10461	19	757399	3.162e-10	TRUE	0.00111954	39.5719
13671_40	35311	Elastase	Neutrophil elastase	ELANE	P08246	ENSG00000277571	1991	HGNC:3309	rs3786991	A	G	-0.1108	0.0102381	0.76566	19	839642	2.699e-27	TRUE	0.0033061	117.122
13671_40	35314	Elastase	Neutrophil elastase	ELANE	P08246	ENSG00000277571	1991	HGNC:3309	rs3795063	G	C	0.0659	0.00897728	0.37972	19	1217560	2.124e-13	TRUE	0.00152369	53.8866
13671_40	35322	Elastase	Neutrophil elastase	ELANE	P08246	ENSG00000277571	1991	HGNC:3309	rs4147911	G	C	0.1203	0.0161608	0.07742	19	1047687	9.774e-14	TRUE	0.0015664	55.412
13671_40	35309	Elastase	Neutrophil elastase	ELANE	P08246	ENSG00000277571	1991	HGNC:3309	rs45477999	A	G	-0.224	0.0392583	0.01263	19	757241	1.158e-08	TRUE	0.000921237	32.5561
13671_40	35308	Elastase	Neutrophil elastase	ELANE	P08246	ENSG00000277571	1991	HGNC:3309	rs56003700	T	A	0.068	0.00889294	0.40796	19	771356	2.065e-14	TRUE	0.00165333	58.4692
13671_40	35317	Elastase	Neutrophil elastase	ELANE	P08246	ENSG00000277571	1991	HGNC:3309	rs56234931	T	C	0.1365	0.0193361	0.05245	19	890437	1.673e-12	TRUE	0.00140915	49.8342
13671_40	35311	Elastase	Neutrophil elastase	ELANE	P08246	ENSG00000277571	1991	HGNC:3309	rs62134260	G	T	0.0852	0.0123458	0.14455	19	637909	5.159e-12	TRUE	0.00134701	47.6256
13671_40	35312	Elastase	Neutrophil elastase	ELANE	P08246	ENSG00000277571	1991	HGNC:3309	rs6510873	A	G	0.0686	0.00923584	0.66809	19	664931	1.106e-13	TRUE	0.00155998	55.169
13671_40	35317	Elastase	Neutrophil elastase	ELANE	P08246	ENSG00000277571	1991	HGNC:3309	rs7257836	G	T	0.0628	0.0104661	0.77552	19	1275088	1.969e-09	TRUE	0.00101848	36.0041
13671_40	35309	Elastase	Neutrophil elastase	ELANE	P08246	ENSG00000277571	1991	HGNC:3309	rs7260167	C	T	-0.076	0.00867369	0.47012	19	790696	1.916e-18	TRUE	0.00216978	76.7749
13671_40	35320	Elastase	Neutrophil elastase	ELANE	P08246	ENSG00000277571	1991	HGNC:3309	rs72973523	G	A	0.0665	0.011083	0.19214	19	1019308	1.971e-09	TRUE	0.00101833	36.0021
13671_40	35313	Elastase	Neutrophil elastase	ELANE	P08246	ENSG00000277571	1991	HGNC:3309	rs72976216	A	T	-0.0955	0.0160754	0.07803	19	671856	2.837e-09	TRUE	0.000998483	35.2927
13671_40	35315	Elastase	Neutrophil elastase	ELANE	P08246	ENSG00000277571	1991	HGNC:3309	rs72989732	A	G	0.0983	0.0167011	0.07309	19	1620536	3.96e-09	TRUE	0.000980074	34.6433
13671_40	35309	Elastase	Neutrophil elastase	ELANE	P08246	ENSG00000277571	1991	HGNC:3309	rs73919845	T	C	0.1706	0.0229362	0.03756	19	783473	1.022e-13	TRUE	0.0015645	55.3242
13671_40	35318	Elastase	Neutrophil elastase	ELANE	P08246	ENSG00000277571	1991	HGNC:3309	rs74520045	T	C	0.2002	0.0175295	0.06667	19	925677	3.295e-30	TRUE	0.00367972	130.433
13671_40	35310	Elastase	Neutrophil elastase	ELANE	P08246	ENSG00000277571	1991	HGNC:3309	rs74692002	T	C	-0.1669	0.021138	0.04489	19	775138	2.886e-15	TRUE	0.00176257	62.3427
13671_40	35314	Elastase	Neutrophil elastase	ELANE	P08246	ENSG00000277571	1991	HGNC:3309	rs76698799	G	A	0.1312	0.0181916	0.0619	19	731176	5.509e-13	TRUE	0.00147083	52.0146
13671_40	35314	Elastase	Neutrophil elastase	ELANE	P08246	ENSG00000277571	1991	HGNC:3309	rs78315645	A	G	-0.0864	0.0149578	0.095	19	740198	7.639e-09	TRUE	0.000943968	33.3649
13671_40	35321	Elastase	Neutrophil elastase	ELANE	P08246	ENSG00000277571	1991	HGNC:3309	rs78914045	A	C	0.2812	0.0229157	0.03848	19	1008645	1.295e-34	TRUE	0.00424532	150.58
13671_40	35312	Elastase	Neutrophil elastase	ELANE	P08246	ENSG00000277571	1991	HGNC:3309	rs79295406	G	A	-0.2172	0.0165549	0.07496	19	835564	2.529e-39	TRUE	0.00485131	172.135
13671_40	35316	Elastase	Neutrophil elastase	ELANE	P08246	ENSG00000277571	1991	HGNC:3309	rs79961820	G	A	0.3594	0.0193803	0.05424	19	866032	9.014e-77	TRUE	0.00964451	343.903
13931_22	35366	PSMD9	26S proteasome non-ATPase regulatory subunit 9	PSMD9	O00233	ENSG00000110801	5715	HGNC:9567	rs10082967	G	A	0.0791	0.00902935	0.26514	12	122211782	1.947e-18	TRUE	0.00216539	76.7432
13931_22	35366	PSMD9	26S proteasome non-ATPase regulatory subunit 9	PSMD9	O00233	ENSG00000110801	5715	HGNC:9567	rs10770186	G	A	0.1173	0.0080107	0.54934	12	122361412	1.495e-48	TRUE	0.00602655	214.415
13931_22	35366	PSMD9	26S proteasome non-ATPase regulatory subunit 9	PSMD9	O00233	ENSG00000110801	5715	HGNC:9567	rs1678960	C	T	-0.0588	0.0099823	0.19848	12	122264635	3.852e-09	TRUE	0.000980181	34.6971
13931_22	35366	PSMD9	26S proteasome non-ATPase regulatory subunit 9	PSMD9	O00233	ENSG00000110801	5715	HGNC:9567	rs1678964	A	G	0.1002	0.0144484	0.08096	12	122350333	4.061e-12	TRUE	0.00135815	48.0948
13931_22	35365	PSMD9	26S proteasome non-ATPase regulatory subunit 9	PSMD9	O00233	ENSG00000110801	5715	HGNC:9567	rs28651135	T	C	0.052	0.0082436	0.39129	12	122025332	2.828e-10	TRUE	0.00112392	39.7899
13931_22	35367	PSMD9	26S proteasome non-ATPase regulatory subunit 9	PSMD9	O00233	ENSG00000110801	5715	HGNC:9567	rs77775794	T	G	-0.0762	0.0111114	0.1536	12	122170305	6.992e-12	TRUE	0.00132807	47.0297
13931_22	35367	PSMD9	26S proteasome non-ATPase regulatory subunit 9	PSMD9	O00233	ENSG00000110801	5715	HGNC:9567	rs78120956	T	C	0.1022	0.0185902	0.04845	12	122145340	3.852e-08	TRUE	0.00085386	30.2226
11192_168	35361	TINAL	Tubulointerstitial nephritis antigen-like	TINAGL1	Q9GZM7	ENSG00000142910	64129	HGNC:19168	rs1107427	G	A	0.0625	0.00904015	0.30317	1	31701981	4.725e-12	TRUE	0.00134996	47.7979
11192_168	35363	TINAL	Tubulointerstitial nephritis antigen-like	TINAGL1	Q9GZM7	ENSG00000142910	64129	HGNC:19168	rs3008408	G	T	-0.1158	0.0140492	0.90258	1	32039393	1.687e-16	TRUE	0.00191759	67.9382
11192_168	35364	TINAL	Tubulointerstitial nephritis antigen-like	TINAGL1	Q9GZM7	ENSG00000142910	64129	HGNC:19168	rs4949445	A	G	-0.0934	0.00833088	0.52411	1	32026545	3.589e-29	TRUE	0.00354188	125.693
11192_168	35362	TINAL	Tubulointerstitial nephritis antigen-like	TINAGL1	Q9GZM7	ENSG00000142910	64129	HGNC:19168	rs56168987	T	C	-0.2083	0.0280158	0.02333	1	32042486	1.045e-13	TRUE	0.00156092	55.2805
4906_35	35361	Coagulation Factor V	Coagulation Factor V	F5	P12259	ENSG00000198734	2153	HGNC:3542	rs10489371	A	G	-0.0554	0.0090616	0.27347	1	168932500	9.734e-10	TRUE	0.00105597	37.3775
4906_35	35360	Coagulation Factor V	Coagulation Factor V	F5	P12259	ENSG00000198734	2153	HGNC:3542	rs10800501	C	T	0.0508	0.00809364	0.46789	1	170128903	3.462e-10	TRUE	0.00111293	39.3949
4906_35	35363	Coagulation Factor V	Coagulation Factor V	F5	P12259	ENSG00000198734	2153	HGNC:3542	rs10919202	G	A	-0.081	0.0114208	0.14833	1	169613794	1.319e-12	TRUE	0.00142047	50.3007
4906_35	35362	Coagulation Factor V	Coagulation Factor V	F5	P12259	ENSG00000198734	2153	HGNC:3542	rs112657020	G	A	-0.1583	0.0288339	0.02013	1	168605741	4.018e-08	TRUE	0.000851671	30.1407
4906_35	35363	Coagulation Factor V	Coagulation Factor V	F5	P12259	ENSG00000198734	2153	HGNC:3542	rs114813486	A	G	0.1544	0.0279967	0.02141	1	169170456	3.489e-08	TRUE	0.000859377	30.4146
4906_35	35361	Coagulation Factor V	Coagulation Factor V	F5	P12259	ENSG00000198734	2153	HGNC:3542	rs114868486	A	C	-0.225	0.0237154	0.02875	1	169024128	2.366e-21	TRUE	0.00253922	90.013
4906_35	35361	Coagulation Factor V	Coagulation Factor V	F5	P12259	ENSG00000198734	2153	HGNC:3542	rs115977231	A	G	-0.2205	0.0288478	0.01907	1	169066729	2.113e-14	TRUE	0.00164958	58.424
4906_35	35361	Coagulation Factor V	Coagulation Factor V	F5	P12259	ENSG00000198734	2153	HGNC:3542	rs116671235	T	C	-0.1756	0.0281051	0.02188	1	169047097	4.158e-10	TRUE	0.00110281	39.0372
4906_35	35360	Coagulation Factor V	Coagulation Factor V	F5	P12259	ENSG00000198734	2153	HGNC:3542	rs12736132	A	C	-0.0874	0.011677	0.13713	1	170115897	7.165e-14	TRUE	0.00158193	56.0224
4906_35	35361	Coagulation Factor V	Coagulation Factor V	F5	P12259	ENSG00000198734	2153	HGNC:3542	rs1320969	G	A	0.067	0.00936544	0.24827	1	169012124	8.431e-13	TRUE	0.00144532	51.1791
4906_35	35364	Coagulation Factor V	Coagulation Factor V	F5	P12259	ENSG00000198734	2153	HGNC:3542	rs1323533	A	C	0.0689	0.0101616	0.19307	1	168500219	1.198e-11	TRUE	0.00129842	45.9745
4906_35	35362	Coagulation Factor V	Coagulation Factor V	F5	P12259	ENSG00000198734	2153	HGNC:3542	rs146665419	G	A	-0.2133	0.0387561	0.0106	1	168588807	3.72e-08	TRUE	0.00085589	30.2902
4906_35	35361	Coagulation Factor V	Coagulation Factor V	F5	P12259	ENSG00000198734	2153	HGNC:3542	rs1810482	C	G	-0.0897	0.0147754	0.08141	1	169048837	1.272e-09	TRUE	0.00104124	36.8558
4906_35	35363	Coagulation Factor V	Coagulation Factor V	F5	P12259	ENSG00000198734	2153	HGNC:3542	rs1894692	A	G	-0.1656	0.0287221	0.98103	1	169467654	8.137e-09	TRUE	0.000939195	33.2421
4906_35	35362	Coagulation Factor V	Coagulation Factor V	F5	P12259	ENSG00000198734	2153	HGNC:3542	rs34474628	G	A	-0.0528	0.00837644	0.36439	1	168662822	2.912e-10	TRUE	0.0011224	39.7328
4906_35	35361	Coagulation Factor V	Coagulation Factor V	F5	P12259	ENSG00000198734	2153	HGNC:3542	rs34509543	T	C	-0.1247	0.0222583	0.03388	1	170182326	2.114e-08	TRUE	0.000886877	31.3869
4906_35	35362	Coagulation Factor V	Coagulation Factor V	F5	P12259	ENSG00000198734	2153	HGNC:3542	rs4987391	A	G	0.0477	0.00806379	0.51342	1	169658189	3.312e-09	TRUE	0.000988592	34.9912
4906_35	35362	Coagulation Factor V	Coagulation Factor V	F5	P12259	ENSG00000198734	2153	HGNC:3542	rs57248046	C	T	-0.118	0.0161449	0.06745	1	168692280	2.695e-13	TRUE	0.00150843	53.4188
4906_35	35359	Coagulation Factor V	Coagulation Factor V	F5	P12259	ENSG00000198734	2153	HGNC:3542	rs59548259	C	T	0.1091	0.0180279	0.05327	1	169519671	1.433e-09	TRUE	0.00103475	36.6234
4906_35	35361	Coagulation Factor V	Coagulation Factor V	F5	P12259	ENSG00000198734	2153	HGNC:3542	rs60503143	T	C	0.0691	0.0103785	0.18418	1	168940355	2.776e-11	TRUE	0.00125211	44.3288
4906_35	35364	Coagulation Factor V	Coagulation Factor V	F5	P12259	ENSG00000198734	2153	HGNC:3542	rs61801357	G	A	-0.0615	0.00889831	0.30008	1	168532231	4.798e-12	TRUE	0.001349	47.7678
4906_35	35362	Coagulation Factor V	Coagulation Factor V	F5	P12259	ENSG00000198734	2153	HGNC:3542	rs6673493	T	C	-0.056	0.0102515	0.19615	1	169744647	4.692e-08	TRUE	0.000843181	29.84
4906_35	35360	Coagulation Factor V	Coagulation Factor V	F5	P12259	ENSG00000198734	2153	HGNC:3542	rs77189102	G	A	0.1316	0.0220396	0.0351	1	168899692	2.357e-09	TRUE	0.00100735	35.6537
4906_35	35360	Coagulation Factor V	Coagulation Factor V	F5	P12259	ENSG00000198734	2153	HGNC:3542	rs9332693	G	A	0.1418	0.0223703	0.03468	1	169519304	2.316e-10	TRUE	0.00113509	40.1801
4906_35	35363	Coagulation Factor V	Coagulation Factor V	F5	P12259	ENSG00000198734	2153	HGNC:3542	rs9988604	G	A	0.0783	0.0114113	0.14674	1	169165516	6.808e-12	TRUE	0.00132969	47.0819
6448_36	35346	Sema E	Semaphorin-3C	SEMA3C	Q99985	ENSG00000075223	10512	HGNC:10725	rs1208093	T	C	0.0543	0.00881988	0.68568	7	80610777	7.435e-10	TRUE	0.00107125	37.903
6448_36	35346	Sema E	Semaphorin-3C	SEMA3C	Q99985	ENSG00000075223	10512	HGNC:10725	rs4731998	G	A	0.0916	0.0105127	0.18244	7	80645119	2.953e-18	TRUE	0.00214344	75.9206
6448_36	35346	Sema E	Semaphorin-3C	SEMA3C	Q99985	ENSG00000075223	10512	HGNC:10725	rs917191	C	G	0.1075	0.00826647	0.58373	7	80570871	1.156e-38	TRUE	0.00476198	169.113
6207_10	35371	prosaposin	Prosaposin	PSAP	P07602	ENSG00000197746	5660	HGNC:9498	rs10823772	T	C	-0.056	0.00917164	0.2891	10	73264430	1.023e-09	TRUE	0.00105294	37.2805
6207_10	35373	prosaposin	Prosaposin	PSAP	P07602	ENSG00000197746	5660	HGNC:9498	rs10823879	A	G	-0.0584	0.00973702	0.23581	10	73674692	2.001e-09	TRUE	0.00101598	35.9727
6207_10	35372	prosaposin	Prosaposin	PSAP	P07602	ENSG00000197746	5660	HGNC:9498	rs10823894	T	C	0.1205	0.0082535	0.5413	10	73734056	2.814e-48	TRUE	0.00599036	213.156
6207_10	35373	prosaposin	Prosaposin	PSAP	P07602	ENSG00000197746	5660	HGNC:9498	rs10823904	T	C	0.0691	0.00869028	0.65525	10	73903335	1.844e-15	TRUE	0.00178429	63.2249
6207_10	35374	prosaposin	Prosaposin	PSAP	P07602	ENSG00000197746	5660	HGNC:9498	rs11000064	T	C	-0.2819	0.00894386	0.2907	10	73655176	1e-200	TRUE	0.0273182	993.437
6207_10	35373	prosaposin	Prosaposin	PSAP	P07602	ENSG00000197746	5660	HGNC:9498	rs11000085	T	C	-0.2128	0.0212154	0.03943	10	73678534	1.12e-23	TRUE	0.00283635	100.61
6207_10	35371	prosaposin	Prosaposin	PSAP	P07602	ENSG00000197746	5660	HGNC:9498	rs11000103	A	G	0.1723	0.00931242	0.26472	10	73696947	1.983e-76	TRUE	0.00958605	342.331
6207_10	35370	prosaposin	Prosaposin	PSAP	P07602	ENSG00000197746	5660	HGNC:9498	rs113654122	T	C	0.3161	0.0222374	0.03521	10	73692880	7.42e-46	TRUE	0.00568061	202.06
6207_10	35375	prosaposin	Prosaposin	PSAP	P07602	ENSG00000197746	5660	HGNC:9498	rs117051291	G	A	-0.2459	0.0169166	0.06296	10	73589298	7.166e-48	TRUE	0.00593788	211.295
6207_10	35375	prosaposin	Prosaposin	PSAP	P07602	ENSG00000197746	5660	HGNC:9498	rs117409144	C	T	-0.2238	0.0234054	0.03174	10	73582297	1.156e-21	TRUE	0.00257808	91.4302
6207_10	35374	prosaposin	Prosaposin	PSAP	P07602	ENSG00000197746	5660	HGNC:9498	rs118185529	G	T	-0.2161	0.026366	0.02523	10	73645820	2.482e-16	TRUE	0.00189556	67.1769
6207_10	35374	prosaposin	Prosaposin	PSAP	P07602	ENSG00000197746	5660	HGNC:9498	rs1227042	C	T	-0.1326	0.0242279	0.96938	10	73439101	4.424e-08	TRUE	0.000846114	29.9541
6207_10	35374	prosaposin	Prosaposin	PSAP	P07602	ENSG00000197746	5660	HGNC:9498	rs1227046	C	T	-0.0559	0.00901029	0.6978	10	73432571	5.504e-10	TRUE	0.00108696	38.4898
6207_10	35374	prosaposin	Prosaposin	PSAP	P07602	ENSG00000197746	5660	HGNC:9498	rs1227053	T	C	0.0619	0.00925427	0.7255	10	73500861	2.25e-11	TRUE	0.00126325	44.7401
6207_10	35375	prosaposin	Prosaposin	PSAP	P07602	ENSG00000197746	5660	HGNC:9498	rs12357473	C	A	0.2615	0.0138862	0.0966	10	73527042	4.158e-79	TRUE	0.00992593	354.63
6207_10	35373	prosaposin	Prosaposin	PSAP	P07602	ENSG00000197746	5660	HGNC:9498	rs141430971	A	G	-0.1108	0.0157103	0.07373	10	74219021	1.755e-12	TRUE	0.00140427	49.7403
6207_10	35374	prosaposin	Prosaposin	PSAP	P07602	ENSG00000197746	5660	HGNC:9498	rs142017049	T	C	0.1504	0.0265323	0.02453	10	73658896	1.44e-08	TRUE	0.000907595	32.1326
6207_10	35373	prosaposin	Prosaposin	PSAP	P07602	ENSG00000197746	5660	HGNC:9498	rs1668166	T	C	0.115	0.0121628	0.1337	10	73863381	3.228e-21	TRUE	0.00252108	89.3984
6207_10	35372	prosaposin	Prosaposin	PSAP	P07602	ENSG00000197746	5660	HGNC:9498	rs17635709	T	C	0.0931	0.00951539	0.25351	10	73327423	1.317e-22	TRUE	0.00269921	95.7295
6207_10	35372	prosaposin	Prosaposin	PSAP	P07602	ENSG00000197746	5660	HGNC:9498	rs17708405	T	C	-0.1118	0.0184795	0.05432	10	73306132	1.449e-09	TRUE	0.00103376	36.6018
6207_10	35372	prosaposin	Prosaposin	PSAP	P07602	ENSG00000197746	5660	HGNC:9498	rs1900498	G	A	-0.1132	0.012421	0.87233	10	73603097	7.967e-20	TRUE	0.00234277	83.0583
6207_10	35372	prosaposin	Prosaposin	PSAP	P07602	ENSG00000197746	5660	HGNC:9498	rs34332602	C	T	0.2684	0.0226164	0.03514	10	73609528	1.746e-32	TRUE	0.00396605	140.838
6207_10	35372	prosaposin	Prosaposin	PSAP	P07602	ENSG00000197746	5660	HGNC:9498	rs34576849	G	A	0.1805	0.0222002	0.03467	10	73748499	4.273e-16	TRUE	0.0018655	66.1061
6207_10	35375	prosaposin	Prosaposin	PSAP	P07602	ENSG00000197746	5660	HGNC:9498	rs41281334	A	G	0.2014	0.0165354	0.06846	10	73558128	3.977e-34	TRUE	0.00417637	148.35
6207_10	35372	prosaposin	Prosaposin	PSAP	P07602	ENSG00000197746	5660	HGNC:9498	rs4148912	T	C	-0.0978	0.00972507	0.76201	10	73729498	8.602e-24	TRUE	0.00285113	101.133
6207_10	35370	prosaposin	Prosaposin	PSAP	P07602	ENSG00000197746	5660	HGNC:9498	rs57360357	T	C	-0.0494	0.00852226	0.38277	10	73239446	6.768e-09	TRUE	0.00094912	33.6004
6207_10	35374	prosaposin	Prosaposin	PSAP	P07602	ENSG00000197746	5660	HGNC:9498	rs61650587	A	G	-0.086	0.0112819	0.15969	10	73398722	2.482e-14	TRUE	0.00164006	58.1073
6207_10	35374	prosaposin	Prosaposin	PSAP	P07602	ENSG00000197746	5660	HGNC:9498	rs61852182	T	C	-0.0745	0.0123622	0.13002	10	73638058	1.676e-09	TRUE	0.00102569	36.3181
6207_10	35375	prosaposin	Prosaposin	PSAP	P07602	ENSG00000197746	5660	HGNC:9498	rs6480552	C	T	0.1558	0.00869387	0.34615	10	73515662	8.133e-72	TRUE	0.00899729	321.151
6207_10	35373	prosaposin	Prosaposin	PSAP	P07602	ENSG00000197746	5660	HGNC:9498	rs72806259	T	G	-0.0804	0.0130269	0.11339	10	73793244	6.75e-10	TRUE	0.00107576	38.0916
6207_10	35373	prosaposin	Prosaposin	PSAP	P07602	ENSG00000197746	5660	HGNC:9498	rs72806275	A	C	0.1414	0.023461	0.03318	10	73825355	1.67e-09	TRUE	0.00102592	36.3251
6207_10	35373	prosaposin	Prosaposin	PSAP	P07602	ENSG00000197746	5660	HGNC:9498	rs72810144	C	A	0.1564	0.0267927	0.02385	10	74218564	5.302e-09	TRUE	0.000962441	34.0753
6207_10	35374	prosaposin	Prosaposin	PSAP	P07602	ENSG00000197746	5660	HGNC:9498	rs72815809	A	G	-0.14	0.0230671	0.03262	10	73427676	1.285e-09	TRUE	0.0010403	36.8359
6207_10	35373	prosaposin	Prosaposin	PSAP	P07602	ENSG00000197746	5660	HGNC:9498	rs72817938	T	C	-0.0775	0.0135851	0.10437	10	73450532	1.165e-08	TRUE	0.000919241	32.5444
6207_10	35374	prosaposin	Prosaposin	PSAP	P07602	ENSG00000197746	5660	HGNC:9498	rs748113	C	T	0.0677	0.00829318	0.4447	10	73508791	3.259e-16	TRUE	0.00188043	66.64
6207_10	35372	prosaposin	Prosaposin	PSAP	P07602	ENSG00000197746	5660	HGNC:9498	rs75071136	A	G	-0.1737	0.0280151	0.022	10	73841402	5.638e-10	TRUE	0.0010857	38.4429
6207_10	35373	prosaposin	Prosaposin	PSAP	P07602	ENSG00000197746	5660	HGNC:9498	rs751451	T	G	-0.0786	0.0121111	0.13665	10	73761112	8.589e-11	TRUE	0.00118936	42.1189
6207_10	35373	prosaposin	Prosaposin	PSAP	P07602	ENSG00000197746	5660	HGNC:9498	rs754726	A	G	-0.1206	0.017281	0.06074	10	73378411	2.978e-12	TRUE	0.00137503	48.7031
6207_10	35374	prosaposin	Prosaposin	PSAP	P07602	ENSG00000197746	5660	HGNC:9498	rs75859595	G	T	0.1752	0.0130924	0.11312	10	73666083	7.724e-41	TRUE	0.00503706	179.073
6207_10	35375	prosaposin	Prosaposin	PSAP	P07602	ENSG00000197746	5660	HGNC:9498	rs9415044	T	G	-0.2581	0.0081803	0.48856	10	73539586	1e-200	TRUE	0.0273724	995.493
6207_10	35375	prosaposin	Prosaposin	PSAP	P07602	ENSG00000197746	5660	HGNC:9498	rs9415055	A	G	-0.1074	0.0144697	0.08881	10	73582034	1.15e-13	TRUE	0.00155505	55.0923
8364_74	35356	UST	Uronyl 2-sulfotransferase	UST	Q9Y2C2	ENSG00000111962	10090	HGNC:17223	rs112683173	T	C	-0.1752	0.0248969	0.02761	6	149022607	1.964e-12	TRUE	0.00139872	49.5196
8364_74	35380	UST	Uronyl 2-sulfotransferase	UST	Q9Y2C2	ENSG00000111962	10090	HGNC:17223	rs12523793	A	G	-0.0531	0.00888032	0.32199	6	149973764	2.238e-09	TRUE	0.00100963	35.7546
8364_74	35376	UST	Uronyl 2-sulfotransferase	UST	Q9Y2C2	ENSG00000111962	10090	HGNC:17223	rs12527307	C	A	-0.1211	0.0146931	0.08867	6	149254294	1.694e-16	TRUE	0.00191666	67.93
8364_74	35373	UST	Uronyl 2-sulfotransferase	UST	Q9Y2C2	ENSG00000111962	10090	HGNC:17223	rs17079169	A	C	-0.0615	0.00960956	0.2474	6	149187499	1.555e-10	TRUE	0.00115663	40.9585
8364_74	35377	UST	Uronyl 2-sulfotransferase	UST	Q9Y2C2	ENSG00000111962	10090	HGNC:17223	rs2062124	C	T	-0.2178	0.0268957	0.97579	6	149148117	5.589e-16	TRUE	0.00185033	65.5769
8364_74	35352	UST	Uronyl 2-sulfotransferase	UST	Q9Y2C2	ENSG00000111962	10090	HGNC:17223	rs208704	G	A	0.0587	0.0086489	0.362	6	148897510	1.145e-11	TRUE	0.00130136	46.0632
8364_74	35380	UST	Uronyl 2-sulfotransferase	UST	Q9Y2C2	ENSG00000111962	10090	HGNC:17223	rs479676	C	T	-0.0582	0.00875948	0.34146	6	149633956	3.048e-11	TRUE	0.00124628	44.1458
8364_74	35352	UST	Uronyl 2-sulfotransferase	UST	Q9Y2C2	ENSG00000111962	10090	HGNC:17223	rs60463810	T	C	-0.1032	0.018605	0.05235	6	148909271	2.908e-08	TRUE	0.000869624	30.768
8364_74	35353	UST	Uronyl 2-sulfotransferase	UST	Q9Y2C2	ENSG00000111962	10090	HGNC:17223	rs62434593	G	A	-0.0666	0.0109165	0.17694	6	148914338	1.055e-09	TRUE	0.00105178	37.2205
8364_74	35356	UST	Uronyl 2-sulfotransferase	UST	Q9Y2C2	ENSG00000111962	10090	HGNC:17223	rs6920109	C	T	-0.1405	0.00966918	0.76124	6	149066468	7.742e-48	TRUE	0.00593675	211.141
8364_74	35356	UST	Uronyl 2-sulfotransferase	UST	Q9Y2C2	ENSG00000111962	10090	HGNC:17223	rs72995020	A	G	-0.1641	0.0188285	0.05195	6	149066223	2.894e-18	TRUE	0.00214396	75.9605
8364_74	35359	UST	Uronyl 2-sulfotransferase	UST	Q9Y2C2	ENSG00000111962	10090	HGNC:17223	rs77139823	C	T	-0.079	0.0108526	0.17487	6	149101428	3.354e-13	TRUE	0.00149645	52.9891
8364_74	35359	UST	Uronyl 2-sulfotransferase	UST	Q9Y2C2	ENSG00000111962	10090	HGNC:17223	rs78139916	G	A	0.0653	0.0108094	0.17941	6	149105857	1.531e-09	TRUE	0.00103111	36.4945
8364_74	35356	UST	Uronyl 2-sulfotransferase	UST	Q9Y2C2	ENSG00000111962	10090	HGNC:17223	rs9403970	C	T	0.059	0.00944939	0.74137	6	148961227	4.271e-10	TRUE	0.00110149	38.9849
8364_74	35354	UST	Uronyl 2-sulfotransferase	UST	Q9Y2C2	ENSG00000111962	10090	HGNC:17223	rs9689438	T	C	0.0524	0.00866582	0.36421	6	148860133	1.478e-09	TRUE	0.00103319	36.5631
6444_15	35366	PSG3	Pregnancy-specific beta-1-glycoprotein 3	PSG3	Q16557	ENSG00000221826	5671	HGNC:9520	rs10421413	T	C	-0.2066	0.035826	0.01141	19	43316551	8.081e-09	TRUE	0.000939494	33.2555
6444_15	35370	PSG3	Pregnancy-specific beta-1-glycoprotein 3	PSG3	Q16557	ENSG00000221826	5671	HGNC:9520	rs1056995	A	G	0.0577	0.0100987	0.18769	19	42591484	1.106e-08	TRUE	0.00092217	32.6454
6444_15	35362	PSG3	Pregnancy-specific beta-1-glycoprotein 3	PSG3	Q16557	ENSG00000221826	5671	HGNC:9520	rs111506697	G	A	-0.1502	0.0205205	0.03787	19	43957635	2.489e-13	TRUE	0.00151284	53.5751
6444_15	35369	PSG3	Pregnancy-specific beta-1-glycoprotein 3	PSG3	Q16557	ENSG00000221826	5671	HGNC:9520	rs111638712	A	G	-0.1984	0.0247373	0.02626	19	42956113	1.055e-15	TRUE	0.00181548	64.325
6444_15	35360	PSG3	Pregnancy-specific beta-1-glycoprotein 3	PSG3	Q16557	ENSG00000221826	5671	HGNC:9520	rs111712264	G	T	-0.2366	0.0161014	0.06578	19	43848005	7e-49	TRUE	0.00606978	215.926
6444_15	35375	PSG3	Pregnancy-specific beta-1-glycoprotein 3	PSG3	Q16557	ENSG00000221826	5671	HGNC:9520	rs112253907	C	G	-0.2081	0.0312833	0.01571	19	42243363	2.889e-11	TRUE	0.00124941	44.2507
6444_15	35370	PSG3	Pregnancy-specific beta-1-glycoprotein 3	PSG3	Q16557	ENSG00000221826	5671	HGNC:9520	rs112365002	G	C	-0.1665	0.0285169	0.01936	19	42595436	5.263e-09	TRUE	0.000962928	34.0897
6444_15	35371	PSG3	Pregnancy-specific beta-1-glycoprotein 3	PSG3	Q16557	ENSG00000221826	5671	HGNC:9520	rs112563718	A	G	0.2199	0.0283379	0.01931	19	42312304	8.498e-15	TRUE	0.00169963	60.2164
6444_15	35367	PSG3	Pregnancy-specific beta-1-glycoprotein 3	PSG3	Q16557	ENSG00000221826	5671	HGNC:9520	rs115190425	T	C	-0.1156	0.0210284	0.03717	19	44206883	3.856e-08	TRUE	0.000853803	30.2206
6444_15	35367	PSG3	Pregnancy-specific beta-1-glycoprotein 3	PSG3	Q16557	ENSG00000221826	5671	HGNC:9520	rs11668247	T	C	-0.091	0.00798733	0.41037	19	44194362	4.529e-30	TRUE	0.00365691	129.801
6444_15	35370	PSG3	Pregnancy-specific beta-1-glycoprotein 3	PSG3	Q16557	ENSG00000221826	5671	HGNC:9520	rs116993807	C	A	-0.2208	0.0319719	0.01517	19	42698568	4.983e-12	TRUE	0.00134668	47.6937
6444_15	35362	PSG3	Pregnancy-specific beta-1-glycoprotein 3	PSG3	Q16557	ENSG00000221826	5671	HGNC:9520	rs117498036	G	A	-0.2032	0.0195137	0.04306	19	43933888	2.158e-25	TRUE	0.00305723	108.435
6444_15	35366	PSG3	Pregnancy-specific beta-1-glycoprotein 3	PSG3	Q16557	ENSG00000221826	5671	HGNC:9520	rs117675184	G	T	0.1621	0.0195191	0.04323	19	43285052	1.001e-16	TRUE	0.00194642	68.9675
6444_15	35360	PSG3	Pregnancy-specific beta-1-glycoprotein 3	PSG3	Q16557	ENSG00000221826	5671	HGNC:9520	rs117919456	G	A	-0.2219	0.0331321	0.01355	19	43844777	2.121e-11	TRUE	0.00126701	44.8557
6444_15	35365	PSG3	Pregnancy-specific beta-1-glycoprotein 3	PSG3	Q16557	ENSG00000221826	5671	HGNC:9520	rs118044821	A	C	-0.2994	0.0194122	0.04337	19	43596014	1.141e-53	TRUE	0.00668182	237.879
6444_15	35368	PSG3	Pregnancy-specific beta-1-glycoprotein 3	PSG3	Q16557	ENSG00000221826	5671	HGNC:9520	rs11879826	T	C	-0.1262	0.0129405	0.10485	19	42879382	1.803e-22	TRUE	0.00268203	95.1077
6444_15	35365	PSG3	Pregnancy-specific beta-1-glycoprotein 3	PSG3	Q16557	ENSG00000221826	5671	HGNC:9520	rs12462059	T	A	-0.3863	0.037982	0.01142	19	43401318	2.682e-24	TRUE	0.0029166	103.441
6444_15	35370	PSG3	Pregnancy-specific beta-1-glycoprotein 3	PSG3	Q16557	ENSG00000221826	5671	HGNC:9520	rs12977527	T	C	0.0488	0.00794294	0.46407	19	42467607	8.056e-10	TRUE	0.00106611	37.7465
6444_15	35367	PSG3	Pregnancy-specific beta-1-glycoprotein 3	PSG3	Q16557	ENSG00000221826	5671	HGNC:9520	rs137991504	A	G	-0.3064	0.0200174	0.04055	19	43264836	6.9e-53	TRUE	0.00658143	234.294
6444_15	35370	PSG3	Pregnancy-specific beta-1-glycoprotein 3	PSG3	Q16557	ENSG00000221826	5671	HGNC:9520	rs138485069	C	A	0.4887	0.0252775	0.02495	19	42486278	2.811e-83	TRUE	0.0104578	373.781
6444_15	35365	PSG3	Pregnancy-specific beta-1-glycoprotein 3	PSG3	Q16557	ENSG00000221826	5671	HGNC:9520	rs140064353	G	T	0.2934	0.0230079	0.03004	19	43671680	3.033e-37	TRUE	0.00457746	162.617
6444_15	35365	PSG3	Pregnancy-specific beta-1-glycoprotein 3	PSG3	Q16557	ENSG00000221826	5671	HGNC:9520	rs140168895	G	A	0.6973	0.0274885	0.02011	19	43666852	5.833e-142	TRUE	0.0178714	643.486
6444_15	35367	PSG3	Pregnancy-specific beta-1-glycoprotein 3	PSG3	Q16557	ENSG00000221826	5671	HGNC:9520	rs141116769	G	C	-0.1805	0.0206139	0.03814	19	44168134	2.019e-18	TRUE	0.00216331	76.6715
6444_15	35365	PSG3	Pregnancy-specific beta-1-glycoprotein 3	PSG3	Q16557	ENSG00000221826	5671	HGNC:9520	rs141659491	T	C	-0.3119	0.027718	0.02132	19	43485849	2.248e-29	TRUE	0.00356785	126.622
6444_15	35367	PSG3	Pregnancy-specific beta-1-glycoprotein 3	PSG3	Q16557	ENSG00000221826	5671	HGNC:9520	rs142250189	C	T	-0.2732	0.0326934	0.01529	19	44202643	6.465e-17	TRUE	0.00197065	69.8298
6444_15	35366	PSG3	Pregnancy-specific beta-1-glycoprotein 3	PSG3	Q16557	ENSG00000221826	5671	HGNC:9520	rs142770509	T	C	-0.2177	0.0285938	0.0199	19	43379729	2.667e-14	TRUE	0.00163644	57.9659
6444_15	35365	PSG3	Pregnancy-specific beta-1-glycoprotein 3	PSG3	Q16557	ENSG00000221826	5671	HGNC:9520	rs143112167	A	G	0.5672	0.0324512	0.0147	19	43579341	2.087e-68	TRUE	0.00856498	305.5
6444_15	35365	PSG3	Pregnancy-specific beta-1-glycoprotein 3	PSG3	Q16557	ENSG00000221826	5671	HGNC:9520	rs144764562	A	G	-0.1682	0.0280428	0.02049	19	43539305	1.998e-09	TRUE	0.00101629	35.9756
6444_15	35370	PSG3	Pregnancy-specific beta-1-glycoprotein 3	PSG3	Q16557	ENSG00000221826	5671	HGNC:9520	rs145061137	G	C	0.233	0.0226578	0.03036	19	42607994	8.368e-25	TRUE	0.00298106	105.749
6444_15	35365	PSG3	Pregnancy-specific beta-1-glycoprotein 3	PSG3	Q16557	ENSG00000221826	5671	HGNC:9520	rs146307156	C	T	0.2194	0.0259461	0.0225	19	43514361	2.767e-17	TRUE	0.00201792	71.504
6444_15	35365	PSG3	Pregnancy-specific beta-1-glycoprotein 3	PSG3	Q16557	ENSG00000221826	5671	HGNC:9520	rs146818202	G	A	0.2838	0.0364953	0.01148	19	43792638	7.465e-15	TRUE	0.0017071	60.4715
6444_15	35365	PSG3	Pregnancy-specific beta-1-glycoprotein 3	PSG3	Q16557	ENSG00000221826	5671	HGNC:9520	rs146861808	T	G	-0.2388	0.0294272	0.01873	19	43404388	4.86e-16	TRUE	0.00185872	65.8524
6444_15	35371	PSG3	Pregnancy-specific beta-1-glycoprotein 3	PSG3	Q16557	ENSG00000221826	5671	HGNC:9520	rs146922948	A	G	-0.2807	0.0238677	0.02772	19	43997550	6.226e-32	TRUE	0.00389533	138.313
6444_15	35371	PSG3	Pregnancy-specific beta-1-glycoprotein 3	PSG3	Q16557	ENSG00000221826	5671	HGNC:9520	rs148090004	A	G	-0.2328	0.0339969	0.01394	19	44005528	7.506e-12	TRUE	0.001324	46.8906
6444_15	35365	PSG3	Pregnancy-specific beta-1-glycoprotein 3	PSG3	Q16557	ENSG00000221826	5671	HGNC:9520	rs148165098	C	G	-0.36	0.0191116	0.04461	19	43461041	3.773e-79	TRUE	0.00993409	354.824
6444_15	35365	PSG3	Pregnancy-specific beta-1-glycoprotein 3	PSG3	Q16557	ENSG00000221826	5671	HGNC:9520	rs148192391	G	A	-0.3856	0.036203	0.01183	19	43618982	1.724e-26	TRUE	0.00319775	113.445
6444_15	35373	PSG3	Pregnancy-specific beta-1-glycoprotein 3	PSG3	Q16557	ENSG00000221826	5671	HGNC:9520	rs148876440	C	T	0.1958	0.0216185	0.03479	19	44016280	1.34e-19	TRUE	0.00231378	82.0305
6444_15	35365	PSG3	Pregnancy-specific beta-1-glycoprotein 3	PSG3	Q16557	ENSG00000221826	5671	HGNC:9520	rs149067422	A	G	0.2237	0.0270712	0.02093	19	43580103	1.416e-16	TRUE	0.00192721	68.2835
6444_15	35369	PSG3	Pregnancy-specific beta-1-glycoprotein 3	PSG3	Q16557	ENSG00000221826	5671	HGNC:9520	rs149190709	T	C	-0.2135	0.0363959	0.01167	19	42840451	4.463e-09	TRUE	0.00097201	34.4105
6444_15	35370	PSG3	Pregnancy-specific beta-1-glycoprotein 3	PSG3	Q16557	ENSG00000221826	5671	HGNC:9520	rs149243051	C	G	-0.3024	0.0303182	0.01781	19	42613758	1.977e-23	TRUE	0.00280495	99.4845
6444_15	35365	PSG3	Pregnancy-specific beta-1-glycoprotein 3	PSG3	Q16557	ENSG00000221826	5671	HGNC:9520	rs150099209	A	G	-0.3319	0.0291324	0.01805	19	43423794	4.541e-30	TRUE	0.00365697	129.796
6444_15	35370	PSG3	Pregnancy-specific beta-1-glycoprotein 3	PSG3	Q16557	ENSG00000221826	5671	HGNC:9520	rs151237118	T	C	-0.1386	0.0239695	0.02787	19	43992131	7.366e-09	TRUE	0.000944473	33.4357
6444_15	35368	PSG3	Pregnancy-specific beta-1-glycoprotein 3	PSG3	Q16557	ENSG00000221826	5671	HGNC:9520	rs17655646	A	G	0.0636	0.00933693	0.22612	19	44134936	9.648e-12	TRUE	0.00131024	46.3987
6444_15	35365	PSG3	Pregnancy-specific beta-1-glycoprotein 3	PSG3	Q16557	ENSG00000221826	5671	HGNC:9520	rs182674396	T	G	0.2239	0.0315063	0.01587	19	43794143	1.19e-12	TRUE	0.00142609	50.5027
6444_15	35365	PSG3	Pregnancy-specific beta-1-glycoprotein 3	PSG3	Q16557	ENSG00000221826	5671	HGNC:9520	rs187896757	G	A	-0.2228	0.0291056	0.01975	19	43423187	1.935e-14	TRUE	0.00165428	58.5971
6444_15	35367	PSG3	Pregnancy-specific beta-1-glycoprotein 3	PSG3	Q16557	ENSG00000221826	5671	HGNC:9520	rs189476836	G	A	0.2443	0.0269808	0.02131	19	43226114	1.371e-19	TRUE	0.0023129	81.9853
6444_15	35370	PSG3	Pregnancy-specific beta-1-glycoprotein 3	PSG3	Q16557	ENSG00000221826	5671	HGNC:9520	rs189755335	T	C	-0.2184	0.0394151	0.01019	19	42465139	3.007e-08	TRUE	0.000867348	30.703
6444_15	35369	PSG3	Pregnancy-specific beta-1-glycoprotein 3	PSG3	Q16557	ENSG00000221826	5671	HGNC:9520	rs2170103	C	T	0.1255	0.0155186	0.92969	19	42554278	6.112e-16	TRUE	0.00184579	65.4006
6444_15	35368	PSG3	Pregnancy-specific beta-1-glycoprotein 3	PSG3	Q16557	ENSG00000221826	5671	HGNC:9520	rs2283628	C	T	-0.0605	0.0106679	0.1651	19	44163061	1.418e-08	TRUE	0.000908593	32.1625
6444_15	35361	PSG3	Pregnancy-specific beta-1-glycoprotein 3	PSG3	Q16557	ENSG00000221826	5671	HGNC:9520	rs2355989	T	C	0.0744	0.0091679	0.23937	19	43921146	4.847e-16	TRUE	0.00185908	65.8576
6444_15	35367	PSG3	Pregnancy-specific beta-1-glycoprotein 3	PSG3	Q16557	ENSG00000221826	5671	HGNC:9520	rs2599437	C	T	-0.127	0.00851166	0.31452	19	43979439	2.417e-50	TRUE	0.00625576	222.627
6444_15	35362	PSG3	Pregnancy-specific beta-1-glycoprotein 3	PSG3	Q16557	ENSG00000221826	5671	HGNC:9520	rs2682569	T	C	-0.0945	0.0164489	0.06045	19	43944285	9.189e-09	TRUE	0.000932548	33.0057
6444_15	35358	PSG3	Pregnancy-specific beta-1-glycoprotein 3	PSG3	Q16557	ENSG00000221826	5671	HGNC:9520	rs35043884	T	C	-0.1395	0.0101379	0.18932	19	43867338	4.421e-43	TRUE	0.00532683	189.344
6444_15	35368	PSG3	Pregnancy-specific beta-1-glycoprotein 3	PSG3	Q16557	ENSG00000221826	5671	HGNC:9520	rs36229204	T	C	0.1306	0.0234509	0.02865	19	44175982	2.561e-08	TRUE	0.000876191	31.0146
6444_15	35369	PSG3	Pregnancy-specific beta-1-glycoprotein 3	PSG3	Q16557	ENSG00000221826	5671	HGNC:9520	rs41517950	A	G	-0.3271	0.0312887	0.01653	19	43024889	1.401e-25	TRUE	0.00308069	109.291
6444_15	35369	PSG3	Pregnancy-specific beta-1-glycoprotein 3	PSG3	Q16557	ENSG00000221826	5671	HGNC:9520	rs45485892	G	C	0.2336	0.0204877	0.03635	19	43964846	4.087e-30	TRUE	0.00366243	130.005
6444_15	35356	PSG3	Pregnancy-specific beta-1-glycoprotein 3	PSG3	Q16557	ENSG00000221826	5671	HGNC:9520	rs4803617	A	G	0.1238	0.00839888	0.66946	19	43867658	3.565e-49	TRUE	0.006108	217.269
6444_15	35359	PSG3	Pregnancy-specific beta-1-glycoprotein 3	PSG3	Q16557	ENSG00000221826	5671	HGNC:9520	rs56084866	C	T	0.4587	0.0129564	0.10068	19	43853746	1e-200	TRUE	0.034236	1253.39
6444_15	35365	PSG3	Pregnancy-specific beta-1-glycoprotein 3	PSG3	Q16557	ENSG00000221826	5671	HGNC:9520	rs576755986	A	G	0.1442	0.0159767	0.06726	19	43271614	1.786e-19	TRUE	0.00229832	81.4627
6444_15	35365	PSG3	Pregnancy-specific beta-1-glycoprotein 3	PSG3	Q16557	ENSG00000221826	5671	HGNC:9520	rs60924103	G	C	-0.43	0.0259307	0.02395	19	43723726	9.303e-62	TRUE	0.00771605	274.984
6444_15	35367	PSG3	Pregnancy-specific beta-1-glycoprotein 3	PSG3	Q16557	ENSG00000221826	5671	HGNC:9520	rs62114137	A	T	0.075	0.0105418	0.17102	19	44205337	1.123e-12	TRUE	0.00142921	50.6164
6444_15	35365	PSG3	Pregnancy-specific beta-1-glycoprotein 3	PSG3	Q16557	ENSG00000221826	5671	HGNC:9520	rs6509074	G	A	-0.2853	0.00967832	0.79945	19	43770566	5.469e-191	TRUE	0.0239835	868.968
6444_15	35364	PSG3	Pregnancy-specific beta-1-glycoprotein 3	PSG3	Q16557	ENSG00000221826	5671	HGNC:9520	rs66774479	A	G	0.2208	0.00898912	0.26306	19	43876931	3.14e-133	TRUE	0.0167756	603.342
6444_15	35369	PSG3	Pregnancy-specific beta-1-glycoprotein 3	PSG3	Q16557	ENSG00000221826	5671	HGNC:9520	rs71336817	A	G	0.2149	0.0162797	0.06338	19	43045120	8.721e-40	TRUE	0.00490281	174.252
6444_15	35361	PSG3	Pregnancy-specific beta-1-glycoprotein 3	PSG3	Q16557	ENSG00000221826	5671	HGNC:9520	rs73041544	A	G	0.3063	0.0203369	0.04067	19	43916804	2.909e-51	TRUE	0.00637454	226.843
6444_15	35372	PSG3	Pregnancy-specific beta-1-glycoprotein 3	PSG3	Q16557	ENSG00000221826	5671	HGNC:9520	rs74357826	G	A	0.189	0.0307777	0.01687	19	44088633	8.21e-10	TRUE	0.00106501	37.7096
6444_15	35370	PSG3	Pregnancy-specific beta-1-glycoprotein 3	PSG3	Q16557	ENSG00000221826	5671	HGNC:9520	rs74488471	A	G	-0.2811	0.0197908	0.04169	19	42485332	8.708e-46	TRUE	0.0056717	201.741
6444_15	35368	PSG3	Pregnancy-specific beta-1-glycoprotein 3	PSG3	Q16557	ENSG00000221826	5671	HGNC:9520	rs75281511	C	G	0.3708	0.0323239	0.01485	19	43059040	1.837e-30	TRUE	0.00370709	131.593
6444_15	35362	PSG3	Pregnancy-specific beta-1-glycoprotein 3	PSG3	Q16557	ENSG00000221826	5671	HGNC:9520	rs75637033	T	C	0.1653	0.020746	0.03679	19	43927907	1.615e-15	TRUE	0.0017922	63.4861
6444_15	35368	PSG3	Pregnancy-specific beta-1-glycoprotein 3	PSG3	Q16557	ENSG00000221826	5671	HGNC:9520	rs78813119	T	G	0.1786	0.017635	0.05431	19	42896139	4.169e-24	TRUE	0.00289179	102.568
6444_15	35367	PSG3	Pregnancy-specific beta-1-glycoprotein 3	PSG3	Q16557	ENSG00000221826	5671	HGNC:9520	rs8104645	C	T	0.0864	0.0132199	0.09805	19	44221265	6.335e-11	TRUE	0.00120635	42.7142
6444_15	35369	PSG3	Pregnancy-specific beta-1-glycoprotein 3	PSG3	Q16557	ENSG00000221826	5671	HGNC:9520	rs9304605	G	A	0.0709	0.00902542	0.25637	19	43138308	3.979e-15	TRUE	0.00174182	61.7103
6444_15	35364	PSG3	Pregnancy-specific beta-1-glycoprotein 3	PSG3	Q16557	ENSG00000221826	5671	HGNC:9520	rs9304629	G	C	0.2881	0.0115577	0.13027	19	43891882	3.785e-137	TRUE	0.017268	621.36
6444_15	35375	PSG3	Pregnancy-specific beta-1-glycoprotein 3	PSG3	Q16557	ENSG00000221826	5671	HGNC:9520	rs9621	A	G	0.2499	0.017345	0.05572	19	42231159	4.634e-47	TRUE	0.00583407	207.58
7769_29	35281	3BP2	SH3 domain-binding protein 2	SH3BP2	P78314	ENSG00000087266	6452	HGNC:10825	rs10013269	C	A	-0.1577	0.0149846	0.07633	4	2807910	6.686e-26	TRUE	0.00312966	110.758
7769_29	35281	3BP2	SH3 domain-binding protein 2	SH3BP2	P78314	ENSG00000087266	6452	HGNC:10825	rs1099786	A	G	0.1219	0.0101222	0.80898	4	2476325	2.117e-33	TRUE	0.00409407	145.029
7769_29	35281	3BP2	SH3 domain-binding protein 2	SH3BP2	P78314	ENSG00000087266	6452	HGNC:10825	rs114508137	A	G	0.1116	0.0162763	0.06401	4	2434095	7.053e-12	TRUE	0.00133082	47.0127
7769_29	35281	3BP2	SH3 domain-binding protein 2	SH3BP2	P78314	ENSG00000087266	6452	HGNC:10825	rs114884302	G	A	-0.1777	0.0226417	0.03261	4	2783395	4.215e-15	TRUE	0.00174295	61.5968
7769_29	35282	3BP2	SH3 domain-binding protein 2	SH3BP2	P78314	ENSG00000087266	6452	HGNC:10825	rs116100149	C	T	0.1928	0.0271028	0.02292	4	2687024	1.13e-12	TRUE	0.00143231	50.6043
7769_29	35281	3BP2	SH3 domain-binding protein 2	SH3BP2	P78314	ENSG00000087266	6452	HGNC:10825	rs116355813	T	C	0.1541	0.0163632	0.06244	4	2779536	4.62e-21	TRUE	0.00250763	88.6891
7769_29	35281	3BP2	SH3 domain-binding protein 2	SH3BP2	P78314	ENSG00000087266	6452	HGNC:10825	rs116559977	C	T	-0.1246	0.016389	0.06346	4	2773467	2.901e-14	TRUE	0.0016357	57.8005
7769_29	35283	3BP2	SH3 domain-binding protein 2	SH3BP2	P78314	ENSG00000087266	6452	HGNC:10825	rs116829201	T	C	0.2248	0.0399971	0.01034	4	3328004	1.905e-08	TRUE	0.000894555	31.5891
7769_29	35282	3BP2	SH3 domain-binding protein 2	SH3BP2	P78314	ENSG00000087266	6452	HGNC:10825	rs13103813	C	A	-0.0486	0.0080123	0.50821	4	3468436	1.314e-09	TRUE	0.00104178	36.7924
7769_29	35281	3BP2	SH3 domain-binding protein 2	SH3BP2	P78314	ENSG00000087266	6452	HGNC:10825	rs140123590	T	C	-0.1516	0.0161169	0.06689	4	2773997	5.139e-21	TRUE	0.00250169	88.4785
7769_29	35281	3BP2	SH3 domain-binding protein 2	SH3BP2	P78314	ENSG00000087266	6452	HGNC:10825	rs150964220	A	G	0.1495	0.0230318	0.03001	4	2447870	8.525e-11	TRUE	0.00119287	42.1335
7769_29	35281	3BP2	SH3 domain-binding protein 2	SH3BP2	P78314	ENSG00000087266	6452	HGNC:10825	rs1770823	C	G	-0.0882	0.00996553	0.20284	4	2513615	8.712e-19	TRUE	0.00221543	78.3315
7769_29	35281	3BP2	SH3 domain-binding protein 2	SH3BP2	P78314	ENSG00000087266	6452	HGNC:10825	rs1784147	G	T	-0.0825	0.01157	0.13742	4	2819457	9.999e-13	TRUE	0.00143913	50.8443
7769_29	35281	3BP2	SH3 domain-binding protein 2	SH3BP2	P78314	ENSG00000087266	6452	HGNC:10825	rs1877722	A	G	-0.1329	0.0181251	0.05051	4	2765560	2.261e-13	TRUE	0.00152164	53.7638
7769_29	35281	3BP2	SH3 domain-binding protein 2	SH3BP2	P78314	ENSG00000087266	6452	HGNC:10825	rs231179	A	G	0.2533	0.00794551	0.43375	4	2769594	1e-200	TRUE	0.0280012	1016.31
7769_29	35282	3BP2	SH3 domain-binding protein 2	SH3BP2	P78314	ENSG00000087266	6452	HGNC:10825	rs231702	T	C	0.1104	0.0129523	0.10759	4	2686191	1.547e-17	TRUE	0.00205505	72.6514
7769_29	35281	3BP2	SH3 domain-binding protein 2	SH3BP2	P78314	ENSG00000087266	6452	HGNC:10825	rs28435878	G	A	-0.1417	0.0252475	0.02616	4	2546333	1.995e-08	TRUE	0.000892069	31.4994
7769_29	35283	3BP2	SH3 domain-binding protein 2	SH3BP2	P78314	ENSG00000087266	6452	HGNC:10825	rs2857844	A	G	0.0441	0.00807324	0.56116	4	3029588	4.695e-08	TRUE	0.000845032	29.8388
7769_29	35282	3BP2	SH3 domain-binding protein 2	SH3BP2	P78314	ENSG00000087266	6452	HGNC:10825	rs4690060	A	G	0.1013	0.00803282	0.48646	4	2760222	1.842e-36	TRUE	0.00448746	159.031
7769_29	35281	3BP2	SH3 domain-binding protein 2	SH3BP2	P78314	ENSG00000087266	6452	HGNC:10825	rs4974702	A	T	0.0927	0.00843211	0.33777	4	2476922	4.098e-28	TRUE	0.00341418	120.861
7769_29	35283	3BP2	SH3 domain-binding protein 2	SH3BP2	P78314	ENSG00000087266	6452	HGNC:10825	rs60566117	A	G	0.081	0.00904658	0.26586	4	3027321	3.439e-19	TRUE	0.00226712	80.168
7769_29	35283	3BP2	SH3 domain-binding protein 2	SH3BP2	P78314	ENSG00000087266	6452	HGNC:10825	rs61791187	A	G	-0.0975	0.0138634	0.09255	4	2918217	2.023e-12	TRUE	0.00139997	49.4615
7769_29	35280	3BP2	SH3 domain-binding protein 2	SH3BP2	P78314	ENSG00000087266	6452	HGNC:10825	rs6599427	A	G	-0.0463	0.00837332	0.3587	4	2344692	3.212e-08	TRUE	0.000865938	30.575
7769_29	35281	3BP2	SH3 domain-binding protein 2	SH3BP2	P78314	ENSG00000087266	6452	HGNC:10825	rs743689	G	A	0.0885	0.00879042	0.70585	4	2790799	7.669e-24	TRUE	0.00286487	101.36
7769_29	35281	3BP2	SH3 domain-binding protein 2	SH3BP2	P78314	ENSG00000087266	6452	HGNC:10825	rs76429729	A	G	-0.166	0.0219026	0.03433	4	2429882	3.482e-14	TRUE	0.00162556	57.4414
7769_29	35283	3BP2	SH3 domain-binding protein 2	SH3BP2	P78314	ENSG00000087266	6452	HGNC:10825	rs7696040	C	T	-0.1008	0.0127487	0.11082	4	3031491	2.643e-15	TRUE	0.00176881	62.5159
7769_29	35281	3BP2	SH3 domain-binding protein 2	SH3BP2	P78314	ENSG00000087266	6452	HGNC:10825	rs77363958	G	A	-0.1098	0.0188944	0.04717	4	2802487	6.201e-09	TRUE	0.000956327	33.7706
7769_29	35281	3BP2	SH3 domain-binding protein 2	SH3BP2	P78314	ENSG00000087266	6452	HGNC:10825	rs79302885	T	C	0.1098	0.0168439	0.05943	4	2566176	7.092e-11	TRUE	0.00120305	42.4934
17694_32	35375	PSME2	Proteasome activator complex subunit 2	PSME2	Q9UL46	ENSG00000100911	5721	HGNC:9569	rs117674184	T	C	-0.2746	0.0298899	0.01814	14	24611217	4.038e-20	TRUE	0.00238037	84.4017
17694_32	35378	PSME2	Proteasome activator complex subunit 2	PSME2	Q9UL46	ENSG00000100911	5721	HGNC:9569	rs117849039	T	G	-0.2748	0.030998	0.01736	14	25396385	7.644e-19	TRUE	0.00221663	78.5899
17694_32	35379	PSME2	Proteasome activator complex subunit 2	PSME2	Q9UL46	ENSG00000100911	5721	HGNC:9569	rs139416456	A	C	-0.181	0.0217671	0.03342	14	24699947	9.153e-17	TRUE	0.00195068	69.144
17694_32	35377	PSME2	Proteasome activator complex subunit 2	PSME2	Q9UL46	ENSG00000100911	5721	HGNC:9569	rs148483440	C	T	-0.2981	0.0308131	0.01691	14	25032368	3.872e-22	TRUE	0.00263881	93.5948
17694_32	35375	PSME2	Proteasome activator complex subunit 2	PSME2	Q9UL46	ENSG00000100911	5721	HGNC:9569	rs180953787	C	G	-0.4061	0.0314467	0.01649	14	24457921	3.757e-38	TRUE	0.00469247	166.769
17694_32	35375	PSME2	Proteasome activator complex subunit 2	PSME2	Q9UL46	ENSG00000100911	5721	HGNC:9569	rs4261448	G	A	-0.0677	0.0116556	0.136	14	24274746	6.309e-09	TRUE	0.000952841	33.737
17694_32	35377	PSME2	Proteasome activator complex subunit 2	PSME2	Q9UL46	ENSG00000100911	5721	HGNC:9569	rs4575	C	T	0.0849	0.00864419	0.30823	14	24615435	9.087e-23	TRUE	0.00271949	96.4642
17694_32	35375	PSME2	Proteasome activator complex subunit 2	PSME2	Q9UL46	ENSG00000100911	5721	HGNC:9569	rs62000680	A	G	-0.1075	0.0164544	0.06399	14	24891362	6.437e-11	TRUE	0.0012052	42.683
17694_32	35375	PSME2	Proteasome activator complex subunit 2	PSME2	Q9UL46	ENSG00000100911	5721	HGNC:9569	rs72692103	T	C	-0.0806	0.0128826	0.1072	14	24383179	3.937e-10	TRUE	0.00110538	39.1439
4992_49	35369	GRN	Granulins	GRN	P28799	ENSG00000030582	2896	HGNC:4601	rs113146332	C	G	-0.1847	0.0230979	0.03332	17	42565977	1.281e-15	TRUE	0.00180471	63.9426
4992_49	35367	GRN	Granulins	GRN	P28799	ENSG00000030582	2896	HGNC:4601	rs117651003	A	G	-0.1152	0.0203596	0.04308	17	42645780	1.529e-08	TRUE	0.000904486	32.0161
4992_49	35371	GRN	Granulins	GRN	P28799	ENSG00000030582	2896	HGNC:4601	rs12451763	T	C	-0.2498	0.024421	0.02676	17	42490912	1.472e-24	TRUE	0.00294952	104.63
4992_49	35364	GRN	Granulins	GRN	P28799	ENSG00000030582	2896	HGNC:4601	rs17759537	A	G	-0.1491	0.0243966	0.02864	17	43417458	9.869e-10	TRUE	0.00105512	37.3506
4992_49	35372	GRN	Granulins	GRN	P28799	ENSG00000030582	2896	HGNC:4601	rs2046534	A	G	0.0882	0.0143936	0.90642	17	42062562	8.914e-10	TRUE	0.00106048	37.5491
4992_49	35368	GRN	Granulins	GRN	P28799	ENSG00000030582	2896	HGNC:4601	rs4098686	C	A	0.0691	0.00960033	0.75446	17	42629737	6.125e-13	TRUE	0.00146272	51.8065
4992_49	35370	GRN	Granulins	GRN	P28799	ENSG00000030582	2896	HGNC:4601	rs5848	T	C	-0.2177	0.00936978	0.25559	17	42430244	2.052e-119	TRUE	0.0150338	539.831
4992_49	35369	GRN	Granulins	GRN	P28799	ENSG00000030582	2896	HGNC:4601	rs71372000	T	C	-0.1148	0.0201518	0.04354	17	42565372	1.221e-08	TRUE	0.00091677	32.4532
4992_49	35369	GRN	Granulins	GRN	P28799	ENSG00000030582	2896	HGNC:4601	rs72824771	A	G	-0.1508	0.0203864	0.04111	17	42622636	1.392e-13	TRUE	0.00154473	54.717
4992_49	35370	GRN	Granulins	GRN	P28799	ENSG00000030582	2896	HGNC:4601	rs72826861	A	G	-0.152	0.0262615	0.02457	17	42819135	7.125e-09	TRUE	0.000946298	33.5004
4992_49	35369	GRN	Granulins	GRN	P28799	ENSG00000030582	2896	HGNC:4601	rs74826440	G	A	0.0895	0.0127722	0.12197	17	42567350	2.428e-12	TRUE	0.00138648	49.1036
4992_49	35373	GRN	Granulins	GRN	P28799	ENSG00000030582	2896	HGNC:4601	rs77536093	G	A	-0.1777	0.0243456	0.02862	17	42092328	2.898e-13	TRUE	0.00150395	53.2762
4992_49	35369	GRN	Granulins	GRN	P28799	ENSG00000030582	2896	HGNC:4601	rs78652172	G	A	0.0904	0.0151256	0.08076	17	43020784	2.278e-09	TRUE	0.00100897	35.7201
4992_49	35373	GRN	Granulins	GRN	P28799	ENSG00000030582	2896	HGNC:4601	rs78701771	C	T	-0.374	0.0396215	0.01145	17	41516261	3.752e-21	TRUE	0.00251271	89.1008
4992_49	35372	GRN	Granulins	GRN	P28799	ENSG00000030582	2896	HGNC:4601	rs80206375	A	G	-0.1903	0.0281936	0.02226	17	41989634	1.481e-11	TRUE	0.00128642	45.5591
15499_11	35390	Attractin	Attractin	ATRN	O75882	ENSG00000088812	8455	HGNC:885	rs1015159	G	A	0.0541	0.00869453	0.58271	20	2593006	4.899e-10	TRUE	0.00109288	38.7171
15499_11	35373	Attractin	Attractin	ATRN	O75882	ENSG00000088812	8455	HGNC:885	rs10485512	A	C	-0.0613	0.00858218	0.45377	20	4406221	9.151e-13	TRUE	0.0014403	51.0183
15499_11	35373	Attractin	Attractin	ATRN	O75882	ENSG00000088812	8455	HGNC:885	rs11087565	C	T	-0.1153	0.0107623	0.1956	20	3084593	8.81e-27	TRUE	0.00323443	114.776
15499_11	35373	Attractin	Attractin	ATRN	O75882	ENSG00000088812	8455	HGNC:885	rs117368183	T	C	-0.2192	0.0257499	0.02966	20	3849164	1.7e-17	TRUE	0.00204453	72.4652
15499_11	35373	Attractin	Attractin	ATRN	O75882	ENSG00000088812	8455	HGNC:885	rs12624404	T	C	-0.0601	0.00861921	0.48249	20	4138487	3.107e-12	TRUE	0.00137268	48.6199
15499_11	35379	Attractin	Attractin	ATRN	O75882	ENSG00000088812	8455	HGNC:885	rs13042775	A	G	-0.0702	0.012159	0.14374	20	2690383	7.765e-09	TRUE	0.000941338	33.3331
15499_11	35378	Attractin	Attractin	ATRN	O75882	ENSG00000088812	8455	HGNC:885	rs140699010	C	T	-0.379	0.0283408	0.02379	20	3325698	8.703e-41	TRUE	0.00502985	178.836
15499_11	35372	Attractin	Attractin	ATRN	O75882	ENSG00000088812	8455	HGNC:885	rs141486209	G	A	-0.3868	0.0361713	0.01498	20	3079017	1.091e-26	TRUE	0.00322261	114.352
15499_11	35377	Attractin	Attractin	ATRN	O75882	ENSG00000088812	8455	HGNC:885	rs144235722	A	G	-0.1778	0.0285314	0.02369	20	2770645	4.613e-10	TRUE	0.00109659	38.8345
15499_11	35376	Attractin	Attractin	ATRN	O75882	ENSG00000088812	8455	HGNC:885	rs144469244	G	C	-0.9145	0.0379668	0.01328	20	3797146	3.435e-128	TRUE	0.0161365	580.175
15499_11	35377	Attractin	Attractin	ATRN	O75882	ENSG00000088812	8455	HGNC:885	rs145733206	T	C	-0.4422	0.0419018	0.01065	20	2496522	4.907e-26	TRUE	0.00313842	111.371
15499_11	35377	Attractin	Attractin	ATRN	O75882	ENSG00000088812	8455	HGNC:885	rs147223281	A	G	-0.3199	0.0357519	0.01491	20	2763982	3.627e-19	TRUE	0.00225815	80.0628
15499_11	35372	Attractin	Attractin	ATRN	O75882	ENSG00000088812	8455	HGNC:885	rs1624186	C	T	-0.0615	0.0108813	0.8116	20	4143031	1.587e-08	TRUE	0.000902317	31.9438
15499_11	35374	Attractin	Attractin	ATRN	O75882	ENSG00000088812	8455	HGNC:885	rs1741344	T	C	-0.0601	0.00915836	0.67473	20	4101800	5.298e-11	TRUE	0.00121598	43.0639
15499_11	35375	Attractin	Attractin	ATRN	O75882	ENSG00000088812	8455	HGNC:885	rs17548962	T	C	0.1118	0.0172644	0.06553	20	3661803	9.434e-11	TRUE	0.00118412	41.9354
15499_11	35378	Attractin	Attractin	ATRN	O75882	ENSG00000088812	8455	HGNC:885	rs185561619	G	T	-0.2777	0.0337933	0.01618	20	3193217	2.076e-16	TRUE	0.00190526	67.5291
15499_11	35374	Attractin	Attractin	ATRN	O75882	ENSG00000088812	8455	HGNC:885	rs2077151	G	A	-0.0494	0.00868038	0.59627	20	3786831	1.263e-08	TRUE	0.000914786	32.3874
15499_11	35378	Attractin	Attractin	ATRN	O75882	ENSG00000088812	8455	HGNC:885	rs2170971	A	T	0.1147	0.00883999	0.37648	20	3422533	1.693e-38	TRUE	0.00473645	168.354
15499_11	35375	Attractin	Attractin	ATRN	O75882	ENSG00000088812	8455	HGNC:885	rs2280092	T	C	0.0818	0.0119689	0.15185	20	3653587	8.237e-12	TRUE	0.00131872	46.7085
15499_11	35378	Attractin	Attractin	ATRN	O75882	ENSG00000088812	8455	HGNC:885	rs235526	T	A	-0.1351	0.0104836	0.79013	20	3597979	5.339e-38	TRUE	0.00467251	166.071
15499_11	35372	Attractin	Attractin	ATRN	O75882	ENSG00000088812	8455	HGNC:885	rs2422841	A	G	0.0863	0.0139728	0.89446	20	3080352	6.563e-10	TRUE	0.00107733	38.1464
15499_11	35374	Attractin	Attractin	ATRN	O75882	ENSG00000088812	8455	HGNC:885	rs2853210	C	T	-0.0575	0.00997775	0.76275	20	3658211	8.272e-09	TRUE	0.000938	33.2101
15499_11	35375	Attractin	Attractin	ATRN	O75882	ENSG00000088812	8455	HGNC:885	rs35173613	T	C	-0.1665	0.0262356	0.02754	20	4000496	2.205e-10	TRUE	0.00113731	40.276
15499_11	35376	Attractin	Attractin	ATRN	O75882	ENSG00000088812	8455	HGNC:885	rs41310169	T	C	-0.1774	0.0324111	0.01744	20	2776975	4.414e-08	TRUE	0.00084619	29.9585
15499_11	35375	Attractin	Attractin	ATRN	O75882	ENSG00000088812	8455	HGNC:885	rs516681	C	G	0.1594	0.0283959	0.97636	20	3730208	1.983e-08	TRUE	0.000890032	31.5111
15499_11	35376	Attractin	Attractin	ATRN	O75882	ENSG00000088812	8455	HGNC:885	rs574174	T	C	-0.3186	0.0114819	0.16043	20	3650694	1.847e-169	TRUE	0.0213022	769.946
15499_11	35378	Attractin	Attractin	ATRN	O75882	ENSG00000088812	8455	HGNC:885	rs6037513	C	T	-0.1158	0.00874137	0.59711	20	3223225	4.674e-40	TRUE	0.00493629	175.492
15499_11	35377	Attractin	Attractin	ATRN	O75882	ENSG00000088812	8455	HGNC:885	rs6051596	G	A	0.0473	0.00861509	0.51607	20	3114478	4.011e-08	TRUE	0.000851405	30.1441
15499_11	35378	Attractin	Attractin	ATRN	O75882	ENSG00000088812	8455	HGNC:885	rs6051857	A	G	-0.4513	0.0133332	0.11302	20	3412564	1e-200	TRUE	0.0313699	1145.68
15499_11	35378	Attractin	Attractin	ATRN	O75882	ENSG00000088812	8455	HGNC:885	rs6051865	A	G	-0.2868	0.0146672	0.09102	20	3420289	3.823e-85	TRUE	0.0106927	382.354
15499_11	35375	Attractin	Attractin	ATRN	O75882	ENSG00000088812	8455	HGNC:885	rs6052017	A	G	-0.2695	0.0274262	0.0259	20	3681598	8.669e-23	TRUE	0.00272226	96.5575
15499_11	35376	Attractin	Attractin	ATRN	O75882	ENSG00000088812	8455	HGNC:885	rs6052257	G	A	0.0526	0.00859578	0.55362	20	4018579	9.4e-10	TRUE	0.00105744	37.4456
15499_11	35376	Attractin	Attractin	ATRN	O75882	ENSG00000088812	8455	HGNC:885	rs6052524	T	C	0.0723	0.00860568	0.45969	20	4332612	4.411e-17	TRUE	0.00199139	70.5839
15499_11	35377	Attractin	Attractin	ATRN	O75882	ENSG00000088812	8455	HGNC:885	rs6084154	A	G	-0.0845	0.011129	0.18152	20	2746354	3.132e-14	TRUE	0.00162702	57.6498
15499_11	35376	Attractin	Attractin	ATRN	O75882	ENSG00000088812	8455	HGNC:885	rs6084462	T	C	-0.2591	0.0198062	0.05086	20	3754875	4.186e-39	TRUE	0.00481452	171.133
15499_11	35376	Attractin	Attractin	ATRN	O75882	ENSG00000088812	8455	HGNC:885	rs6084702	A	G	0.0512	0.00873388	0.61039	20	4307661	4.567e-09	TRUE	0.000970553	34.3657
15499_11	35374	Attractin	Attractin	ATRN	O75882	ENSG00000088812	8455	HGNC:885	rs6084758	T	C	-0.0505	0.00868185	0.41853	20	4444527	6.001e-09	TRUE	0.000955615	33.8343
15499_11	35373	Attractin	Attractin	ATRN	O75882	ENSG00000088812	8455	HGNC:885	rs609203	A	C	-0.1624	0.0109082	0.18802	20	3670945	3.948e-50	TRUE	0.00622742	221.65
15499_11	35378	Attractin	Attractin	ATRN	O75882	ENSG00000088812	8455	HGNC:885	rs6115905	T	C	-0.2694	0.0150607	0.08951	20	3437152	1.472e-71	TRUE	0.0089637	319.968
15499_11	35375	Attractin	Attractin	ATRN	O75882	ENSG00000088812	8455	HGNC:885	rs6116020	T	C	-0.0587	0.00895259	0.35425	20	3742093	5.499e-11	TRUE	0.00121389	42.9911
15499_11	35378	Attractin	Attractin	ATRN	O75882	ENSG00000088812	8455	HGNC:885	rs6139034	T	C	-0.0943	0.00977331	0.25593	20	3202069	4.977e-22	TRUE	0.00262476	93.0979
15499_11	35375	Attractin	Attractin	ATRN	O75882	ENSG00000088812	8455	HGNC:885	rs62206555	A	G	0.0743	0.0100726	0.2371	20	3730524	1.626e-13	TRUE	0.00153586	54.4116
15499_11	35374	Attractin	Attractin	ATRN	O75882	ENSG00000088812	8455	HGNC:885	rs6515857	A	C	-0.2284	0.0283929	0.02374	20	4085268	8.676e-16	TRUE	0.00182608	64.7103
15499_11	35373	Attractin	Attractin	ATRN	O75882	ENSG00000088812	8455	HGNC:885	rs67308836	C	T	-0.2055	0.0192541	0.05377	20	4107367	1.361e-26	TRUE	0.0032102	113.914
15499_11	35374	Attractin	Attractin	ATRN	O75882	ENSG00000088812	8455	HGNC:885	rs7273066	A	G	-0.1991	0.0185433	0.05642	20	4207891	6.822e-27	TRUE	0.00324858	115.283
15499_11	35377	Attractin	Attractin	ATRN	O75882	ENSG00000088812	8455	HGNC:885	rs73076841	C	G	0.0729	0.0133167	0.11642	20	3174894	4.392e-08	TRUE	0.000846439	29.9682
15499_11	35371	Attractin	Attractin	ATRN	O75882	ENSG00000088812	8455	HGNC:885	rs73610112	T	C	-0.5586	0.0389702	0.01157	20	3839266	1.341e-46	TRUE	0.00577562	205.465
15499_11	35377	Attractin	Attractin	ATRN	O75882	ENSG00000088812	8455	HGNC:885	rs74401648	A	G	-0.2749	0.0350192	0.0146	20	3138749	4.161e-15	TRUE	0.00173894	61.6222
15499_11	35375	Attractin	Attractin	ATRN	O75882	ENSG00000088812	8455	HGNC:885	rs74681709	T	C	-0.123	0.0195678	0.04871	20	4277917	3.261e-10	TRUE	0.00111576	39.5117
15499_11	35378	Attractin	Attractin	ATRN	O75882	ENSG00000088812	8455	HGNC:885	rs76034548	C	T	-0.8019	0.0237144	0.03251	20	3212819	1e-200	TRUE	0.0313107	1143.45
15499_11	35377	Attractin	Attractin	ATRN	O75882	ENSG00000088812	8455	HGNC:885	rs78446054	T	A	-0.26	0.0137118	0.1077	20	3580391	3.53e-80	TRUE	0.0100617	359.549
2973_15	35347	CD36 ANTIGEN	Platelet glycoprotein 4	CD36	P16671	ENSG00000135218	948	HGNC:1663	rs116925008	T	C	-0.25	0.0291704	0.021	7	79952238	1.032e-17	TRUE	0.00207379	73.4503
2973_15	35347	CD36 ANTIGEN	Platelet glycoprotein 4	CD36	P16671	ENSG00000135218	948	HGNC:1663	rs117334659	T	C	-0.1375	0.0217255	0.03782	7	79584385	2.468e-10	TRUE	0.001132	40.0559
2973_15	35344	CD36 ANTIGEN	Platelet glycoprotein 4	CD36	P16671	ENSG00000135218	948	HGNC:1663	rs117427219	A	G	-0.1783	0.0265557	0.02359	7	80365289	1.891e-11	TRUE	0.00127393	45.0805
2973_15	35347	CD36 ANTIGEN	Platelet glycoprotein 4	CD36	P16671	ENSG00000135218	948	HGNC:1663	rs117479559	A	G	-0.1969	0.0288019	0.02169	7	79726693	8.123e-12	TRUE	0.00132053	46.7358
2973_15	35347	CD36 ANTIGEN	Platelet glycoprotein 4	CD36	P16671	ENSG00000135218	948	HGNC:1663	rs117513167	A	G	-0.1925	0.0225181	0.03429	7	80853893	1.245e-17	TRUE	0.00206335	73.08
2973_15	35346	CD36 ANTIGEN	Platelet glycoprotein 4	CD36	P16671	ENSG00000135218	948	HGNC:1663	rs117778103	A	G	-0.1035	0.0176067	0.05874	7	80584792	4.141e-09	TRUE	0.000976758	34.5563
2973_15	35347	CD36 ANTIGEN	Platelet glycoprotein 4	CD36	P16671	ENSG00000135218	948	HGNC:1663	rs12113010	A	G	0.3458	0.017432	0.05792	7	80220080	1.424e-87	TRUE	0.0110108	393.511
2973_15	35348	CD36 ANTIGEN	Platelet glycoprotein 4	CD36	P16671	ENSG00000135218	948	HGNC:1663	rs143329418	C	T	0.1303	0.0213682	0.03716	7	79035526	1.075e-09	TRUE	0.00105089	37.1839
2973_15	35346	CD36 ANTIGEN	Platelet glycoprotein 4	CD36	P16671	ENSG00000135218	948	HGNC:1663	rs17147992	T	A	0.0752	0.0129305	0.11577	7	80386987	6.038e-09	TRUE	0.000956034	33.8224
2973_15	35347	CD36 ANTIGEN	Platelet glycoprotein 4	CD36	P16671	ENSG00000135218	948	HGNC:1663	rs56246163	C	T	0.1896	0.0299922	0.01955	7	79975520	2.588e-10	TRUE	0.00112938	39.9631
2973_15	35344	CD36 ANTIGEN	Platelet glycoprotein 4	CD36	P16671	ENSG00000135218	948	HGNC:1663	rs61228745	C	T	0.2338	0.0211359	0.03889	7	80495898	1.923e-28	TRUE	0.00345029	122.362
2973_15	35347	CD36 ANTIGEN	Platelet glycoprotein 4	CD36	P16671	ENSG00000135218	948	HGNC:1663	rs6961069	T	C	0.1637	0.00822359	0.4452	7	80218961	3.6e-88	TRUE	0.0110868	396.254
2973_15	35344	CD36 ANTIGEN	Platelet glycoprotein 4	CD36	P16671	ENSG00000135218	948	HGNC:1663	rs73137740	T	C	-0.1507	0.0186815	0.052	7	80432317	7.216e-16	TRUE	0.00183786	65.0734
2973_15	35347	CD36 ANTIGEN	Platelet glycoprotein 4	CD36	P16671	ENSG00000135218	948	HGNC:1663	rs73152220	G	A	-0.1205	0.02022	0.04311	7	80251508	2.531e-09	TRUE	0.0010038	35.515
2973_15	35347	CD36 ANTIGEN	Platelet glycoprotein 4	CD36	P16671	ENSG00000135218	948	HGNC:1663	rs75962166	A	T	0.1797	0.0151606	0.08076	7	80123850	2.074e-32	TRUE	0.00395924	140.496
2973_15	35347	CD36 ANTIGEN	Platelet glycoprotein 4	CD36	P16671	ENSG00000135218	948	HGNC:1663	rs7781105	T	C	-0.072	0.00909812	0.28999	7	80146520	2.498e-15	TRUE	0.00176874	62.627
2973_15	35347	CD36 ANTIGEN	Platelet glycoprotein 4	CD36	P16671	ENSG00000135218	948	HGNC:1663	rs78196716	C	T	0.1906	0.0309775	0.01769	7	80173578	7.61e-10	TRUE	0.00106994	37.8576
2973_15	35345	CD36 ANTIGEN	Platelet glycoprotein 4	CD36	P16671	ENSG00000135218	948	HGNC:1663	rs79965738	C	G	-0.1141	0.0183622	0.05349	7	80766572	5.17e-10	TRUE	0.0010913	38.612
8398_277	35337	RAR-responsive protein TIG1	Retinoic acid receptor responder protein 1	RARRES1	P49788	ENSG00000118849	5918	HGNC:9867	rs10936164	T	C	0.2422	0.00745902	0.59	3	158685039	1e-200	TRUE	0.0289742	1054.35
8398_277	35338	RAR-responsive protein TIG1	Retinoic acid receptor responder protein 1	RARRES1	P49788	ENSG00000118849	5918	HGNC:9867	rs111494744	T	C	-0.1575	0.0204976	0.0342	3	158798482	1.544e-14	TRUE	0.00166807	59.0413
8398_277	35338	RAR-responsive protein TIG1	Retinoic acid receptor responder protein 1	RARRES1	P49788	ENSG00000118849	5918	HGNC:9867	rs112587860	G	A	0.1902	0.0227913	0.02744	3	158692311	7.105e-17	TRUE	0.00196702	69.6436
8398_277	35337	RAR-responsive protein TIG1	Retinoic acid receptor responder protein 1	RARRES1	P49788	ENSG00000118849	5918	HGNC:9867	rs112855434	A	G	-0.2158	0.0180592	0.04163	3	158677510	6.523e-33	TRUE	0.00402486	142.793
8398_277	35338	RAR-responsive protein TIG1	Retinoic acid receptor responder protein 1	RARRES1	P49788	ENSG00000118849	5918	HGNC:9867	rs113899013	G	C	-0.2346	0.020868	0.0322	3	158881676	2.533e-29	TRUE	0.00356391	126.385
8398_277	35338	RAR-responsive protein TIG1	Retinoic acid receptor responder protein 1	RARRES1	P49788	ENSG00000118849	5918	HGNC:9867	rs114283426	C	G	0.3493	0.0204882	0.03427	3	157637025	3.564e-65	TRUE	0.0081586	290.664
8398_277	35338	RAR-responsive protein TIG1	Retinoic acid receptor responder protein 1	RARRES1	P49788	ENSG00000118849	5918	HGNC:9867	rs114677842	T	A	1.1206	0.0323933	0.01378	3	158470000	1e-200	TRUE	0.0327573	1196.71
8398_277	35337	RAR-responsive protein TIG1	Retinoic acid receptor responder protein 1	RARRES1	P49788	ENSG00000118849	5918	HGNC:9867	rs115114952	A	C	-0.2027	0.0240913	0.02334	3	157768159	3.968e-17	TRUE	0.00199947	70.7927
8398_277	35338	RAR-responsive protein TIG1	Retinoic acid receptor responder protein 1	RARRES1	P49788	ENSG00000118849	5918	HGNC:9867	rs115563917	C	T	1.1313	0.0299259	0.05221	3	157609727	1e-200	TRUE	0.038871	1429.1
8398_277	35338	RAR-responsive protein TIG1	Retinoic acid receptor responder protein 1	RARRES1	P49788	ENSG00000118849	5918	HGNC:9867	rs116014661	C	T	-0.2541	0.0338911	0.01195	3	158473844	6.503e-14	TRUE	0.00158829	56.213
8398_277	35339	RAR-responsive protein TIG1	Retinoic acid receptor responder protein 1	RARRES1	P49788	ENSG00000118849	5918	HGNC:9867	rs116101393	C	G	0.7426	0.0196437	0.059	3	158998366	1e-200	TRUE	0.0388699	1429.1
8398_277	35339	RAR-responsive protein TIG1	Retinoic acid receptor responder protein 1	RARRES1	P49788	ENSG00000118849	5918	HGNC:9867	rs1167655	A	G	0.1954	0.021713	0.97134	3	159394815	2.273e-19	TRUE	0.00228658	80.9862
8398_277	35338	RAR-responsive protein TIG1	Retinoic acid receptor responder protein 1	RARRES1	P49788	ENSG00000118849	5918	HGNC:9867	rs11710258	G	A	0.1231	0.00767675	0.63404	3	159269142	7.227e-58	TRUE	0.0072243	257.135
8398_277	35337	RAR-responsive protein TIG1	Retinoic acid receptor responder protein 1	RARRES1	P49788	ENSG00000118849	5918	HGNC:9867	rs12631498	T	C	-0.1081	0.0094314	0.18648	3	157469255	2.054e-30	TRUE	0.0037041	131.371
8398_277	35338	RAR-responsive protein TIG1	Retinoic acid receptor responder protein 1	RARRES1	P49788	ENSG00000118849	5918	HGNC:9867	rs13071228	T	C	-0.2765	0.0190292	0.04038	3	158554610	7.791e-48	TRUE	0.00593941	211.129
8398_277	35338	RAR-responsive protein TIG1	Retinoic acid receptor responder protein 1	RARRES1	P49788	ENSG00000118849	5918	HGNC:9867	rs13077223	A	G	0.2273	0.0115046	0.11519	3	158613086	6.948e-87	TRUE	0.0109261	390.349
8398_277	35337	RAR-responsive protein TIG1	Retinoic acid receptor responder protein 1	RARRES1	P49788	ENSG00000118849	5918	HGNC:9867	rs13080102	T	C	-0.1124	0.0196906	0.03477	3	157823405	1.141e-08	TRUE	0.00092132	32.5849
8398_277	35341	RAR-responsive protein TIG1	Retinoic acid receptor responder protein 1	RARRES1	P49788	ENSG00000118849	5918	HGNC:9867	rs1375406	C	T	-0.7909	0.0209214	0.94798	3	159094888	1e-200	TRUE	0.0388678	1429.1
8398_277	35341	RAR-responsive protein TIG1	Retinoic acid receptor responder protein 1	RARRES1	P49788	ENSG00000118849	5918	HGNC:9867	rs138910865	C	T	-0.2652	0.0290663	0.01678	3	159238822	7.242e-20	TRUE	0.00235013	83.2469
8398_277	35338	RAR-responsive protein TIG1	Retinoic acid receptor responder protein 1	RARRES1	P49788	ENSG00000118849	5918	HGNC:9867	rs140074067	C	G	-0.2136	0.0226606	0.02793	3	158705861	4.258e-21	TRUE	0.00250814	88.8505
8398_277	35338	RAR-responsive protein TIG1	Retinoic acid receptor responder protein 1	RARRES1	P49788	ENSG00000118849	5918	HGNC:9867	rs140272653	C	T	-0.24	0.0237319	0.02533	3	158480247	4.839e-24	TRUE	0.00288593	102.272
8398_277	35337	RAR-responsive protein TIG1	Retinoic acid receptor responder protein 1	RARRES1	P49788	ENSG00000118849	5918	HGNC:9867	rs141652037	G	C	1.1098	0.0293572	0.02262	3	158561557	1e-200	TRUE	0.038872	1429.1
8398_277	35339	RAR-responsive protein TIG1	Retinoic acid receptor responder protein 1	RARRES1	P49788	ENSG00000118849	5918	HGNC:9867	rs143107121	A	C	0.1696	0.0177644	0.04486	3	159403116	1.333e-21	TRUE	0.00257276	91.1483
8398_277	35338	RAR-responsive protein TIG1	Retinoic acid receptor responder protein 1	RARRES1	P49788	ENSG00000118849	5918	HGNC:9867	rs143556684	T	G	-0.1833	0.0243647	0.02336	3	158706875	5.346e-14	TRUE	0.00159915	56.5982
8398_277	35341	RAR-responsive protein TIG1	Retinoic acid receptor responder protein 1	RARRES1	P49788	ENSG00000118849	5918	HGNC:9867	rs144622394	G	C	-0.2973	0.033219	0.01189	3	159253085	3.565e-19	TRUE	0.0022614	80.0969
8398_277	35338	RAR-responsive protein TIG1	Retinoic acid receptor responder protein 1	RARRES1	P49788	ENSG00000118849	5918	HGNC:9867	rs145680856	A	C	-0.2227	0.0208142	0.03143	3	157582588	1.024e-26	TRUE	0.00322923	114.478
8398_277	35338	RAR-responsive protein TIG1	Retinoic acid receptor responder protein 1	RARRES1	P49788	ENSG00000118849	5918	HGNC:9867	rs146161302	T	C	0.2497	0.0188922	0.03944	3	158532699	6.988e-40	TRUE	0.00491943	174.693
8398_277	35337	RAR-responsive protein TIG1	Retinoic acid receptor responder protein 1	RARRES1	P49788	ENSG00000118849	5918	HGNC:9867	rs146263461	A	G	0.2183	0.0223958	0.02871	3	157442435	1.893e-22	TRUE	0.00268166	95.0113
8398_277	35338	RAR-responsive protein TIG1	Retinoic acid receptor responder protein 1	RARRES1	P49788	ENSG00000118849	5918	HGNC:9867	rs147583153	C	T	-0.2915	0.0335969	0.01238	3	158811380	4.085e-18	TRUE	0.00212587	75.2799
8398_277	35338	RAR-responsive protein TIG1	Retinoic acid receptor responder protein 1	RARRES1	P49788	ENSG00000118849	5918	HGNC:9867	rs148829192	C	T	-0.2614	0.0194842	0.03737	3	158607469	4.871e-41	TRUE	0.00506786	179.99
8398_277	35337	RAR-responsive protein TIG1	Retinoic acid receptor responder protein 1	RARRES1	P49788	ENSG00000118849	5918	HGNC:9867	rs150893202	A	C	-0.3426	0.0330762	0.0124	3	157419670	3.853e-25	TRUE	0.00302707	107.286
8398_277	35337	RAR-responsive protein TIG1	Retinoic acid receptor responder protein 1	RARRES1	P49788	ENSG00000118849	5918	HGNC:9867	rs150907623	A	T	-0.2252	0.037698	0.01004	3	157548223	2.318e-09	TRUE	0.00100892	35.6862
8398_277	35338	RAR-responsive protein TIG1	Retinoic acid receptor responder protein 1	RARRES1	P49788	ENSG00000118849	5918	HGNC:9867	rs1515464	A	G	-0.212	0.00797998	0.30335	3	157609802	1.656e-155	TRUE	0.0195822	705.779
8398_277	35337	RAR-responsive protein TIG1	Retinoic acid receptor responder protein 1	RARRES1	P49788	ENSG00000118849	5918	HGNC:9867	rs17475229	C	A	0.2664	0.00938629	0.1907	3	157420596	3.39e-177	TRUE	0.0222888	805.528
8398_277	35341	RAR-responsive protein TIG1	Retinoic acid receptor responder protein 1	RARRES1	P49788	ENSG00000118849	5918	HGNC:9867	rs17741845	C	T	0.1393	0.0239411	0.02414	3	159152612	5.94e-09	TRUE	0.000957068	33.8542
8398_277	35338	RAR-responsive protein TIG1	Retinoic acid receptor responder protein 1	RARRES1	P49788	ENSG00000118849	5918	HGNC:9867	rs17743639	T	G	-0.2259	0.02897	0.01718	3	159304135	6.304e-15	TRUE	0.00171779	60.8043
8398_277	35337	RAR-responsive protein TIG1	Retinoic acid receptor responder protein 1	RARRES1	P49788	ENSG00000118849	5918	HGNC:9867	rs180898353	A	G	-0.2459	0.0224507	0.0282	3	157841339	6.435e-28	TRUE	0.00338362	119.966
8398_277	35340	RAR-responsive protein TIG1	Retinoic acid receptor responder protein 1	RARRES1	P49788	ENSG00000118849	5918	HGNC:9867	rs188794978	G	A	0.1292	0.00827549	0.27088	3	159002469	5.997e-55	TRUE	0.00685031	243.746
8398_277	35341	RAR-responsive protein TIG1	Retinoic acid receptor responder protein 1	RARRES1	P49788	ENSG00000118849	5918	HGNC:9867	rs192495545	A	G	0.2929	0.032508	0.01327	3	159148089	2.059e-19	TRUE	0.00229196	81.1816
8398_277	35341	RAR-responsive protein TIG1	Retinoic acid receptor responder protein 1	RARRES1	P49788	ENSG00000118849	5918	HGNC:9867	rs2166991	A	T	-0.2773	0.00907462	0.79295	3	159073848	1e-200	TRUE	0.0257432	933.777
8398_277	35341	RAR-responsive protein TIG1	Retinoic acid receptor responder protein 1	RARRES1	P49788	ENSG00000118849	5918	HGNC:9867	rs2171846	T	G	-0.2364	0.00859775	0.76147	3	159155504	1.983e-166	TRUE	0.0209449	756.007
8398_277	35337	RAR-responsive protein TIG1	Retinoic acid receptor responder protein 1	RARRES1	P49788	ENSG00000118849	5918	HGNC:9867	rs2361516	G	T	0.2448	0.00752178	0.6219	3	157538373	1e-200	TRUE	0.0291038	1059.21
8398_277	35338	RAR-responsive protein TIG1	Retinoic acid receptor responder protein 1	RARRES1	P49788	ENSG00000118849	5918	HGNC:9867	rs2566347	A	C	-0.4487	0.0118693	0.21608	3	158491377	1e-200	TRUE	0.038871	1429.1
8398_277	35337	RAR-responsive protein TIG1	Retinoic acid receptor responder protein 1	RARRES1	P49788	ENSG00000118849	5918	HGNC:9867	rs2713731	T	A	0.1777	0.0236732	0.97671	3	158416973	6.078e-14	TRUE	0.00159208	56.3459
8398_277	35337	RAR-responsive protein TIG1	Retinoic acid receptor responder protein 1	RARRES1	P49788	ENSG00000118849	5918	HGNC:9867	rs340235	A	G	0.2615	0.00733072	0.51987	3	158658793	1e-200	TRUE	0.03476	1272.48
8398_277	35336	RAR-responsive protein TIG1	Retinoic acid receptor responder protein 1	RARRES1	P49788	ENSG00000118849	5918	HGNC:9867	rs340309	A	G	0.2981	0.00816782	0.27377	3	158570108	1e-200	TRUE	0.0363285	1332.02
8398_277	35337	RAR-responsive protein TIG1	Retinoic acid receptor responder protein 1	RARRES1	P49788	ENSG00000118849	5918	HGNC:9867	rs370393	G	T	0.1163	0.00749243	0.58037	3	158627592	2.45e-54	TRUE	0.00677263	240.943
8398_277	35337	RAR-responsive protein TIG1	Retinoic acid receptor responder protein 1	RARRES1	P49788	ENSG00000118849	5918	HGNC:9867	rs55813571	G	A	0.172	0.00767493	0.63621	3	158727046	3.101e-111	TRUE	0.0140144	502.236
8398_277	35336	RAR-responsive protein TIG1	Retinoic acid receptor responder protein 1	RARRES1	P49788	ENSG00000118849	5918	HGNC:9867	rs55851578	G	A	-0.2669	0.0161133	0.05648	3	157771202	1.27e-61	TRUE	0.00770505	274.364
8398_277	35338	RAR-responsive protein TIG1	Retinoic acid receptor responder protein 1	RARRES1	P49788	ENSG00000118849	5918	HGNC:9867	rs58867467	A	G	0.4712	0.0124645	0.29754	3	157585567	1e-200	TRUE	0.038871	1429.1
8398_277	35338	RAR-responsive protein TIG1	Retinoic acid receptor responder protein 1	RARRES1	P49788	ENSG00000118849	5918	HGNC:9867	rs61794319	A	G	0.2035	0.0161408	0.05562	3	158733200	1.913e-36	TRUE	0.00447828	158.956
8398_277	35341	RAR-responsive protein TIG1	Retinoic acid receptor responder protein 1	RARRES1	P49788	ENSG00000118849	5918	HGNC:9867	rs61794726	T	C	-0.1506	0.0119899	0.10503	3	159254014	3.48e-36	TRUE	0.00444454	157.767
8398_277	35338	RAR-responsive protein TIG1	Retinoic acid receptor responder protein 1	RARRES1	P49788	ENSG00000118849	5918	HGNC:9867	rs61796848	A	G	-0.1928	0.00839609	0.25612	3	158589967	1.091e-116	TRUE	0.0147031	527.302
8398_277	35339	RAR-responsive protein TIG1	Retinoic acid receptor responder protein 1	RARRES1	P49788	ENSG00000118849	5918	HGNC:9867	rs62270362	G	C	-0.0738	0.0118755	0.10686	3	159413276	5.15e-10	TRUE	0.0010917	38.6196
8398_277	35338	RAR-responsive protein TIG1	Retinoic acid receptor responder protein 1	RARRES1	P49788	ENSG00000118849	5918	HGNC:9867	rs62286608	G	T	-0.3956	0.0168254	0.05084	3	158336375	3.071e-122	TRUE	0.0154036	552.817
8398_277	35337	RAR-responsive protein TIG1	Retinoic acid receptor responder protein 1	RARRES1	P49788	ENSG00000118849	5918	HGNC:9867	rs6441236	T	C	-0.3121	0.0269139	0.01984	3	158685799	4.306e-31	TRUE	0.00379122	134.473
8398_277	35338	RAR-responsive protein TIG1	Retinoic acid receptor responder protein 1	RARRES1	P49788	ENSG00000118849	5918	HGNC:9867	rs6778590	T	C	0.095	0.00811057	0.70982	3	158778996	1.092e-31	TRUE	0.00386762	137.197
8398_277	35337	RAR-responsive protein TIG1	Retinoic acid receptor responder protein 1	RARRES1	P49788	ENSG00000118849	5918	HGNC:9867	rs6783747	A	G	-0.166	0.00914101	0.19552	3	157421151	1.072e-73	TRUE	0.00924672	329.782
8398_277	35338	RAR-responsive protein TIG1	Retinoic acid receptor responder protein 1	RARRES1	P49788	ENSG00000118849	5918	HGNC:9867	rs6791259	A	G	-0.4328	0.013098	0.08683	3	158313688	1e-200	TRUE	0.0299729	1091.85
8398_277	35338	RAR-responsive protein TIG1	Retinoic acid receptor responder protein 1	RARRES1	P49788	ENSG00000118849	5918	HGNC:9867	rs6807246	C	T	-0.2633	0.00806885	0.29497	3	158550776	1e-200	TRUE	0.0292528	1064.83
8398_277	35338	RAR-responsive protein TIG1	Retinoic acid receptor responder protein 1	RARRES1	P49788	ENSG00000118849	5918	HGNC:9867	rs73158318	T	C	-0.1715	0.0134921	0.0803	3	158457200	5.131e-37	TRUE	0.00455163	161.572
8398_277	35337	RAR-responsive protein TIG1	Retinoic acid receptor responder protein 1	RARRES1	P49788	ENSG00000118849	5918	HGNC:9867	rs73160676	G	A	-0.1497	0.0163806	0.05402	3	157429009	6.313e-20	TRUE	0.00235804	83.5183
8398_277	35338	RAR-responsive protein TIG1	Retinoic acid receptor responder protein 1	RARRES1	P49788	ENSG00000118849	5918	HGNC:9867	rs73164322	A	G	-0.1371	0.0150303	0.06325	3	158744955	7.404e-20	TRUE	0.0023491	83.2031
8398_277	35341	RAR-responsive protein TIG1	Retinoic acid receptor responder protein 1	RARRES1	P49788	ENSG00000118849	5918	HGNC:9867	rs73166295	A	G	-0.1832	0.0234468	0.026	3	159223205	5.565e-15	TRUE	0.00172457	61.0498
8398_277	35339	RAR-responsive protein TIG1	Retinoic acid receptor responder protein 1	RARRES1	P49788	ENSG00000118849	5918	HGNC:9867	rs73166361	G	T	0.9476	0.0250665	0.16876	3	157981036	1e-200	TRUE	0.0388699	1429.1
8398_277	35339	RAR-responsive protein TIG1	Retinoic acid receptor responder protein 1	RARRES1	P49788	ENSG00000118849	5918	HGNC:9867	rs73877211	A	G	-0.4246	0.0124784	0.09414	3	158177271	1e-200	TRUE	0.0317259	1157.83
8398_277	35338	RAR-responsive protein TIG1	Retinoic acid receptor responder protein 1	RARRES1	P49788	ENSG00000118849	5918	HGNC:9867	rs74641978	T	C	0.2105	0.0247245	0.02254	3	159328606	1.683e-17	TRUE	0.00204711	72.4851
8398_277	35338	RAR-responsive protein TIG1	Retinoic acid receptor responder protein 1	RARRES1	P49788	ENSG00000118849	5918	HGNC:9867	rs75434567	A	G	-0.2646	0.0188282	0.04102	3	159294864	7.344e-45	TRUE	0.00555807	197.498
8398_277	35338	RAR-responsive protein TIG1	Retinoic acid receptor responder protein 1	RARRES1	P49788	ENSG00000118849	5918	HGNC:9867	rs75867594	A	G	0.2066	0.0287662	0.01663	3	159379616	6.868e-13	TRUE	0.00145762	51.5817
8398_277	35337	RAR-responsive protein TIG1	Retinoic acid receptor responder protein 1	RARRES1	P49788	ENSG00000118849	5918	HGNC:9867	rs75874682	A	G	-0.2755	0.0173137	0.04747	3	158683829	5.213e-57	TRUE	0.00711468	253.199
8398_277	35341	RAR-responsive protein TIG1	Retinoic acid receptor responder protein 1	RARRES1	P49788	ENSG00000118849	5918	HGNC:9867	rs76186181	C	G	0.3259	0.00971566	0.16882	3	159199802	1e-200	TRUE	0.0308573	1125.19
8398_277	35338	RAR-responsive protein TIG1	Retinoic acid receptor responder protein 1	RARRES1	P49788	ENSG00000118849	5918	HGNC:9867	rs76188822	C	A	-0.3305	0.0313225	0.01336	3	158730534	4.999e-26	TRUE	0.00314084	111.334
8398_277	35337	RAR-responsive protein TIG1	Retinoic acid receptor responder protein 1	RARRES1	P49788	ENSG00000118849	5918	HGNC:9867	rs7630176	T	C	0.2365	0.00754022	0.6236	3	157829953	1e-200	TRUE	0.0270871	983.772
8398_277	35338	RAR-responsive protein TIG1	Retinoic acid receptor responder protein 1	RARRES1	P49788	ENSG00000118849	5918	HGNC:9867	rs7635993	G	T	0.3557	0.00940921	0.5596	3	158459976	1e-200	TRUE	0.038871	1429.1
8398_277	35339	RAR-responsive protein TIG1	Retinoic acid receptor responder protein 1	RARRES1	P49788	ENSG00000118849	5918	HGNC:9867	rs77054831	A	G	1.1567	0.0337172	0.01146	3	157985085	1e-200	TRUE	0.0322315	1176.9
8398_277	35339	RAR-responsive protein TIG1	Retinoic acid receptor responder protein 1	RARRES1	P49788	ENSG00000118849	5918	HGNC:9867	rs78281684	A	C	-0.212	0.0244917	0.02293	3	158994017	4.886e-18	TRUE	0.00211585	74.9264
8398_277	35337	RAR-responsive protein TIG1	Retinoic acid receptor responder protein 1	RARRES1	P49788	ENSG00000118849	5918	HGNC:9867	rs78550539	A	G	-0.1698	0.0292091	0.01662	3	157513539	6.127e-09	TRUE	0.000955473	33.7939
8398_277	35339	RAR-responsive protein TIG1	Retinoic acid receptor responder protein 1	RARRES1	P49788	ENSG00000118849	5918	HGNC:9867	rs79187869	A	G	0.2275	0.0229545	0.02551	3	159396856	3.732e-23	TRUE	0.002772	98.2263
8398_277	35338	RAR-responsive protein TIG1	Retinoic acid receptor responder protein 1	RARRES1	P49788	ENSG00000118849	5918	HGNC:9867	rs79214982	C	T	-0.2218	0.0194051	0.03818	3	159273307	2.961e-30	TRUE	0.0036836	130.645
8398_277	35338	RAR-responsive protein TIG1	Retinoic acid receptor responder protein 1	RARRES1	P49788	ENSG00000118849	5918	HGNC:9867	rs79453730	T	C	-0.1969	0.0157542	0.05833	3	158798653	7.632e-36	TRUE	0.00440114	156.206
8398_277	35338	RAR-responsive protein TIG1	Retinoic acid receptor responder protein 1	RARRES1	P49788	ENSG00000118849	5918	HGNC:9867	rs79998880	C	T	-0.4016	0.0265254	0.01886	3	157650690	8.792e-52	TRUE	0.00644524	229.226
8398_277	35338	RAR-responsive protein TIG1	Retinoic acid receptor responder protein 1	RARRES1	P49788	ENSG00000118849	5918	HGNC:9867	rs949596	T	C	0.2051	0.0106594	0.13826	3	158852712	1.673e-82	TRUE	0.0103686	370.224
8398_277	35337	RAR-responsive protein TIG1	Retinoic acid receptor responder protein 1	RARRES1	P49788	ENSG00000118849	5918	HGNC:9867	rs9845687	C	T	0.2616	0.00847683	0.75439	3	157682536	1e-200	TRUE	0.0262454	952.377
8398_277	35341	RAR-responsive protein TIG1	Retinoic acid receptor responder protein 1	RARRES1	P49788	ENSG00000118849	5918	HGNC:9867	rs9878126	A	G	-0.1121	0.0081992	0.2749	3	159216101	1.491e-42	TRUE	0.00526166	186.925
17832_12	35176	IDI2	Isopentenyl-diphosphate delta-isomerase 2	IDI2	Q9BXS1	ENSG00000148377	91734	HGNC:23487	rs1044261	T	C	-0.2493	0.0167219	0.05919	10	1065710	2.899e-50	TRUE	0.00627935	222.265
17832_12	35177	IDI2	Isopentenyl-diphosphate delta-isomerase 2	IDI2	Q9BXS1	ENSG00000148377	91734	HGNC:23487	rs2387298	C	T	-0.1204	0.011289	0.857	10	1162279	1.48e-26	TRUE	0.00322334	113.748
17832_12	35176	IDI2	Isopentenyl-diphosphate delta-isomerase 2	IDI2	Q9BXS1	ENSG00000148377	91734	HGNC:23487	rs4880755	T	C	-0.1392	0.00787459	0.53092	10	1060636	6.294e-70	TRUE	0.00880561	312.48
17832_12	35176	IDI2	Isopentenyl-diphosphate delta-isomerase 2	IDI2	Q9BXS1	ENSG00000148377	91734	HGNC:23487	rs61833290	T	C	0.1237	0.0154713	0.07038	10	1029619	1.291e-15	TRUE	0.00181416	63.9272
17832_12	35177	IDI2	Isopentenyl-diphosphate delta-isomerase 2	IDI2	Q9BXS1	ENSG00000148377	91734	HGNC:23487	rs7392620	C	G	-0.0511	0.00828751	0.34942	10	1285054	7.008e-10	TRUE	0.00107967	38.0184
17832_12	35179	IDI2	Isopentenyl-diphosphate delta-isomerase 2	IDI2	Q9BXS1	ENSG00000148377	91734	HGNC:23487	rs7899871	G	C	0.0654	0.00835067	0.65867	10	950617	4.813e-15	TRUE	0.00174059	61.3356
9360_33	35342	EDIL3	EGF-like repeat and discoidin I-like domain-containing protein 3	EDIL3	O43854	ENSG00000164176	10085	HGNC:3173	rs10434639	G	A	-0.0639	0.0085613	0.35296	5	83210347	8.405e-14	TRUE	0.00157388	55.7086
9360_33	35338	EDIL3	EGF-like repeat and discoidin I-like domain-containing protein 3	EDIL3	O43854	ENSG00000164176	10085	HGNC:3173	rs149535660	T	A	0.2124	0.0335165	0.01544	5	83326626	2.34e-10	TRUE	0.00113523	40.1599
9360_33	35339	EDIL3	EGF-like repeat and discoidin I-like domain-containing protein 3	EDIL3	O43854	ENSG00000164176	10085	HGNC:3173	rs2269283	G	T	-0.0563	0.00901923	0.2911	5	83357776	4.314e-10	TRUE	0.00110146	38.9653
9360_33	35342	EDIL3	EGF-like repeat and discoidin I-like domain-containing protein 3	EDIL3	O43854	ENSG00000164176	10085	HGNC:3173	rs2457501	C	T	-0.05	0.00826439	0.4399	5	83657961	1.448e-09	TRUE	0.00103467	36.6031
9360_33	35340	EDIL3	EGF-like repeat and discoidin I-like domain-containing protein 3	EDIL3	O43854	ENSG00000164176	10085	HGNC:3173	rs342422	A	G	-0.0469	0.00824919	0.48274	5	83470986	1.305e-08	TRUE	0.00091387	32.3239
9360_33	35342	EDIL3	EGF-like repeat and discoidin I-like domain-containing protein 3	EDIL3	O43854	ENSG00000164176	10085	HGNC:3173	rs34512718	G	A	-0.1055	0.0185855	0.04906	5	83174040	1.375e-08	TRUE	0.000910951	32.2223
16614_27	35378	RSPO1	R-spondin-1	RSPO1	Q2MKA7	ENSG00000169218	284654	HGNC:21679	rs114120637	A	G	0.1219	0.0222867	0.03426	1	38908616	4.51e-08	TRUE	0.000844965	29.9167
16614_27	35382	RSPO1	R-spondin-1	RSPO1	Q2MKA7	ENSG00000169218	284654	HGNC:21679	rs114191397	T	C	-0.2865	0.0211843	0.037	1	38062934	1.126e-41	TRUE	0.00514309	182.903
16614_27	35382	RSPO1	R-spondin-1	RSPO1	Q2MKA7	ENSG00000169218	284654	HGNC:21679	rs116758313	A	G	0.2616	0.0288662	0.02073	1	38057046	1.275e-19	TRUE	0.00231596	82.1288
16614_27	35380	RSPO1	R-spondin-1	RSPO1	Q2MKA7	ENSG00000169218	284654	HGNC:21679	rs12125439	C	T	0.3645	0.0363886	0.01294	1	37809187	1.285e-23	TRUE	0.00282814	100.338
16614_27	35379	RSPO1	R-spondin-1	RSPO1	Q2MKA7	ENSG00000169218	284654	HGNC:21679	rs148354502	A	G	-0.1364	0.0202611	0.04048	1	38327359	1.672e-11	TRUE	0.00127946	45.3215
16614_27	35382	RSPO1	R-spondin-1	RSPO1	Q2MKA7	ENSG00000169218	284654	HGNC:21679	rs34520891	A	G	-0.1023	0.0143664	0.08543	1	37897976	1.073e-12	TRUE	0.00143113	50.7058
16614_27	35382	RSPO1	R-spondin-1	RSPO1	Q2MKA7	ENSG00000169218	284654	HGNC:21679	rs36043533	G	T	0.4421	0.020563	0.04142	1	38079517	1.566e-102	TRUE	0.0128965	462.238
16614_27	35382	RSPO1	R-spondin-1	RSPO1	Q2MKA7	ENSG00000169218	284654	HGNC:21679	rs4415526	C	T	0.1193	0.00826885	0.6098	1	38071728	3.467e-47	TRUE	0.00584905	208.157
16614_27	35373	RSPO1	R-spondin-1	RSPO1	Q2MKA7	ENSG00000169218	284654	HGNC:21679	rs4634868	A	G	0.0751	0.0101284	0.2021	1	38465315	1.218e-13	TRUE	0.00155195	54.9794
16614_27	35377	RSPO1	R-spondin-1	RSPO1	Q2MKA7	ENSG00000169218	284654	HGNC:21679	rs4652970	A	G	0.056	0.00846821	0.34775	1	38354246	3.767e-11	TRUE	0.00123469	43.7313
16614_27	35381	RSPO1	R-spondin-1	RSPO1	Q2MKA7	ENSG00000169218	284654	HGNC:21679	rs61482335	C	T	0.0685	0.00861196	0.32725	1	38108676	1.805e-15	TRUE	0.00178507	63.267
3329_14	35370	PGRP-S	Peptidoglycan recognition protein 1	PGLYRP1	O75594	ENSG00000008438	8993	HGNC:8904	rs11881956	C	T	-0.2631	0.0361516	0.01374	19	46712439	3.396e-13	TRUE	0.00149529	52.9647
3329_14	35369	PGRP-S	Peptidoglycan recognition protein 1	PGLYRP1	O75594	ENSG00000008438	8993	HGNC:8904	rs13346756	C	T	0.1084	0.0190879	0.04809	19	47026882	1.355e-08	TRUE	0.000911059	32.2508
3329_14	35369	PGRP-S	Peptidoglycan recognition protein 1	PGLYRP1	O75594	ENSG00000008438	8993	HGNC:8904	rs17661517	T	C	-0.1687	0.0279747	0.02267	19	47038631	1.635e-09	TRUE	0.0010272	36.3664
3329_14	35369	PGRP-S	Peptidoglycan recognition protein 1	PGLYRP1	O75594	ENSG00000008438	8993	HGNC:8904	rs2007332	C	T	0.0884	0.00894198	0.30104	19	46538897	4.79e-23	TRUE	0.00275575	97.7321
3329_14	35369	PGRP-S	Peptidoglycan recognition protein 1	PGLYRP1	O75594	ENSG00000008438	8993	HGNC:8904	rs2072563	A	G	-0.1912	0.00870778	0.31858	19	46526648	7.363e-107	TRUE	0.0134488	482.126
3329_14	35369	PGRP-S	Peptidoglycan recognition protein 1	PGLYRP1	O75594	ENSG00000008438	8993	HGNC:8904	rs62136887	C	T	0.058	0.00976523	0.23644	19	47035495	2.86e-09	TRUE	0.000996459	35.2769
3329_14	35365	PGRP-S	Peptidoglycan recognition protein 1	PGLYRP1	O75594	ENSG00000008438	8993	HGNC:8904	rs67602088	A	C	-0.129	0.0216357	0.03685	19	46907137	2.486e-09	TRUE	0.00100428	35.5499
3329_14	35370	PGRP-S	Peptidoglycan recognition protein 1	PGLYRP1	O75594	ENSG00000008438	8993	HGNC:8904	rs71353904	G	A	0.135	0.0229946	0.03313	19	46723474	4.333e-09	TRUE	0.000973607	34.4681
3329_14	35368	PGRP-S	Peptidoglycan recognition protein 1	PGLYRP1	O75594	ENSG00000008438	8993	HGNC:8904	rs759624	A	G	-0.1225	0.0212145	0.96075	19	46512635	7.725e-09	TRUE	0.000941914	33.3431
3329_14	35370	PGRP-S	Peptidoglycan recognition protein 1	PGLYRP1	O75594	ENSG00000008438	8993	HGNC:8904	rs78204669	C	A	-0.1058	0.0151283	0.07843	19	46662449	2.681e-12	TRUE	0.00138095	48.9091
3329_14	35370	PGRP-S	Peptidoglycan recognition protein 1	PGLYRP1	O75594	ENSG00000008438	8993	HGNC:8904	rs8107739	T	G	0.0675	0.00830507	0.58579	19	46665241	4.38e-16	TRUE	0.00186423	66.0573
6039_24	35352	CRHBP	Corticotropin-releasing factor-binding protein	CRHBP	P24387	ENSG00000145708	1393	HGNC:2356	rs10064273	G	T	-0.0793	0.0124125	0.13577	5	75801636	1.673e-10	TRUE	0.00115328	40.8155
6039_24	35356	CRHBP	Corticotropin-releasing factor-binding protein	CRHBP	P24387	ENSG00000145708	1393	HGNC:2356	rs10074631	C	A	0.1708	0.0244728	0.03064	5	76618380	2.969e-12	TRUE	0.00137586	48.709
6039_24	35355	CRHBP	Corticotropin-releasing factor-binding protein	CRHBP	P24387	ENSG00000145708	1393	HGNC:2356	rs10474478	A	G	-0.0962	0.00868352	0.39216	5	75819336	1.596e-28	TRUE	0.00345961	122.732
6039_24	35353	CRHBP	Corticotropin-releasing factor-binding protein	CRHBP	P24387	ENSG00000145708	1393	HGNC:2356	rs111850372	A	G	0.4337	0.0399653	0.01071	5	76196877	1.953e-27	TRUE	0.00332022	117.764
6039_24	35356	CRHBP	Corticotropin-releasing factor-binding protein	CRHBP	P24387	ENSG00000145708	1393	HGNC:2356	rs111887338	A	G	0.2372	0.0372026	0.01242	5	75858674	1.819e-10	TRUE	0.00114854	40.652
6039_24	35356	CRHBP	Corticotropin-releasing factor-binding protein	CRHBP	P24387	ENSG00000145708	1393	HGNC:2356	rs112911797	C	A	0.2582	0.0228306	0.03562	5	75895738	1.179e-29	TRUE	0.00360472	127.902
6039_24	35357	CRHBP	Corticotropin-releasing factor-binding protein	CRHBP	P24387	ENSG00000145708	1393	HGNC:2356	rs114255173	T	C	0.2597	0.0324301	0.01773	5	76876024	1.166e-15	TRUE	0.00181054	64.1279
6039_24	35355	CRHBP	Corticotropin-releasing factor-binding protein	CRHBP	P24387	ENSG00000145708	1393	HGNC:2356	rs114494955	G	C	0.1589	0.0136742	0.10625	5	76314801	3.244e-31	TRUE	0.00380509	135.035
6039_24	35355	CRHBP	Corticotropin-releasing factor-binding protein	CRHBP	P24387	ENSG00000145708	1393	HGNC:2356	rs114856150	A	C	0.1581	0.023179	0.03375	5	77205300	9.052e-12	TRUE	0.00131424	46.5236
6039_24	35354	CRHBP	Corticotropin-releasing factor-binding protein	CRHBP	P24387	ENSG00000145708	1393	HGNC:2356	rs114936058	G	C	0.3782	0.0338532	0.01488	5	76311027	5.606e-29	TRUE	0.00351802	124.808
6039_24	35355	CRHBP	Corticotropin-releasing factor-binding protein	CRHBP	P24387	ENSG00000145708	1393	HGNC:2356	rs114992603	A	G	-0.1293	0.0236134	0.03387	5	76523657	4.358e-08	TRUE	0.000847391	29.9832
6039_24	35356	CRHBP	Corticotropin-releasing factor-binding protein	CRHBP	P24387	ENSG00000145708	1393	HGNC:2356	rs115341403	G	A	0.2226	0.0240497	0.03222	5	75882925	2.126e-20	TRUE	0.00241735	85.6701
6039_24	35357	CRHBP	Corticotropin-releasing factor-binding protein	CRHBP	P24387	ENSG00000145708	1393	HGNC:2356	rs116057168	A	G	0.1667	0.0293361	0.02072	5	75539166	1.328e-08	TRUE	0.000912472	32.2899
6039_24	35359	CRHBP	Corticotropin-releasing factor-binding protein	CRHBP	P24387	ENSG00000145708	1393	HGNC:2356	rs116381125	C	T	-0.1717	0.0313337	0.01842	5	77029474	4.26e-08	TRUE	0.000848541	30.0273
6039_24	35355	CRHBP	Corticotropin-releasing factor-binding protein	CRHBP	P24387	ENSG00000145708	1393	HGNC:2356	rs11747190	A	C	0.3368	0.014696	0.09023	5	76231193	3.086e-116	TRUE	0.0146392	525.227
6039_24	35356	CRHBP	Corticotropin-releasing factor-binding protein	CRHBP	P24387	ENSG00000145708	1393	HGNC:2356	rs11749139	G	T	0.15	0.0258135	0.02714	5	75987967	6.213e-09	TRUE	0.000954194	33.7668
6039_24	35355	CRHBP	Corticotropin-releasing factor-binding protein	CRHBP	P24387	ENSG00000145708	1393	HGNC:2356	rs11950329	A	C	-0.0924	0.00895767	0.33111	5	76037822	6.017e-25	TRUE	0.0030007	106.403
6039_24	35354	CRHBP	Corticotropin-releasing factor-binding protein	CRHBP	P24387	ENSG00000145708	1393	HGNC:2356	rs12518118	G	C	0.3054	0.0230208	0.03483	5	76247314	3.633e-40	TRUE	0.00495366	175.993
6039_24	35353	CRHBP	Corticotropin-releasing factor-binding protein	CRHBP	P24387	ENSG00000145708	1393	HGNC:2356	rs13185349	G	A	0.5001	0.0303366	0.01971	5	76177990	4.699e-61	TRUE	0.00762874	271.757
6039_24	35355	CRHBP	Corticotropin-releasing factor-binding protein	CRHBP	P24387	ENSG00000145708	1393	HGNC:2356	rs13358019	A	G	-0.228	0.0172376	0.06436	5	76235269	6.136e-40	TRUE	0.00492432	174.951
6039_24	35358	CRHBP	Corticotropin-releasing factor-binding protein	CRHBP	P24387	ENSG00000145708	1393	HGNC:2356	rs139033369	G	T	0.2092	0.0356254	0.01352	5	77068107	4.3e-09	TRUE	0.000974357	34.483
6039_24	35355	CRHBP	Corticotropin-releasing factor-binding protein	CRHBP	P24387	ENSG00000145708	1393	HGNC:2356	rs139681325	C	T	-0.1434	0.022705	0.03505	5	76365039	2.688e-10	TRUE	0.00112704	39.8891
6039_24	35356	CRHBP	Corticotropin-releasing factor-binding protein	CRHBP	P24387	ENSG00000145708	1393	HGNC:2356	rs141990324	G	A	-0.282	0.0407532	0.01133	5	75861879	4.526e-12	TRUE	0.00135253	47.8823
6039_24	35357	CRHBP	Corticotropin-releasing factor-binding protein	CRHBP	P24387	ENSG00000145708	1393	HGNC:2356	rs148226105	T	C	0.1386	0.0212404	0.0425	5	76892885	6.786e-11	TRUE	0.0012029	42.5797
6039_24	35353	CRHBP	Corticotropin-releasing factor-binding protein	CRHBP	P24387	ENSG00000145708	1393	HGNC:2356	rs149691483	C	A	-0.3423	0.0317816	0.01828	5	76421168	4.751e-27	TRUE	0.00327067	116.001
6039_24	35356	CRHBP	Corticotropin-releasing factor-binding protein	CRHBP	P24387	ENSG00000145708	1393	HGNC:2356	rs153316	C	T	-0.0847	0.00859004	0.42256	5	76004328	6.189e-23	TRUE	0.00274249	97.2247
6039_24	35356	CRHBP	Corticotropin-releasing factor-binding protein	CRHBP	P24387	ENSG00000145708	1393	HGNC:2356	rs17568237	T	C	-0.1368	0.0138159	0.10256	5	75973445	4.094e-23	TRUE	0.00276551	98.043
6039_24	35355	CRHBP	Corticotropin-releasing factor-binding protein	CRHBP	P24387	ENSG00000145708	1393	HGNC:2356	rs17670556	A	G	-0.1264	0.0205773	0.04406	5	76316101	8.114e-10	TRUE	0.00106617	37.7325
6039_24	35353	CRHBP	Corticotropin-releasing factor-binding protein	CRHBP	P24387	ENSG00000145708	1393	HGNC:2356	rs181645369	G	T	0.3317	0.0376194	0.01289	5	76191767	1.173e-18	TRUE	0.00219438	77.744
6039_24	35358	CRHBP	Corticotropin-releasing factor-binding protein	CRHBP	P24387	ENSG00000145708	1393	HGNC:2356	rs1895253	T	C	-0.0532	0.00907148	0.32478	5	76942322	4.504e-09	TRUE	0.00097181	34.3927
6039_24	35354	CRHBP	Corticotropin-releasing factor-binding protein	CRHBP	P24387	ENSG00000145708	1393	HGNC:2356	rs192186938	G	A	0.2437	0.0291019	0.02202	5	75699967	5.569e-17	TRUE	0.00197967	70.124
6039_24	35346	CRHBP	Corticotropin-releasing factor-binding protein	CRHBP	P24387	ENSG00000145708	1393	HGNC:2356	rs2068434	G	A	0.0733	0.0086075	0.58749	5	75779471	1.654e-17	TRUE	0.00204761	72.5194
6039_24	35355	CRHBP	Corticotropin-releasing factor-binding protein	CRHBP	P24387	ENSG00000145708	1393	HGNC:2356	rs2069643	C	T	0.1055	0.00896802	0.3461	5	75919662	5.981e-32	TRUE	0.00389932	138.392
6039_24	35354	CRHBP	Corticotropin-releasing factor-binding protein	CRHBP	P24387	ENSG00000145708	1393	HGNC:2356	rs2243036	A	G	-0.1446	0.0123947	0.13563	5	76122388	1.896e-31	TRUE	0.00383513	136.101
6039_24	35356	CRHBP	Corticotropin-releasing factor-binding protein	CRHBP	P24387	ENSG00000145708	1393	HGNC:2356	rs2279095	T	G	0.1338	0.0157403	0.08056	5	76709426	1.888e-17	TRUE	0.00203968	72.2582
6039_24	35354	CRHBP	Corticotropin-releasing factor-binding protein	CRHBP	P24387	ENSG00000145708	1393	HGNC:2356	rs2460499	T	C	-0.1798	0.0187005	0.05481	5	76142409	6.931e-22	TRUE	0.0026081	92.4425
6039_24	35355	CRHBP	Corticotropin-releasing factor-binding protein	CRHBP	P24387	ENSG00000145708	1393	HGNC:2356	rs247750	A	G	-0.1247	0.00868455	0.38839	5	76295720	9.379e-47	TRUE	0.00579811	206.176
6039_24	35356	CRHBP	Corticotropin-releasing factor-binding protein	CRHBP	P24387	ENSG00000145708	1393	HGNC:2356	rs253094	G	A	-0.0534	0.00959597	0.25934	5	75961154	2.624e-08	TRUE	0.000875157	30.9674
6039_24	35354	CRHBP	Corticotropin-releasing factor-binding protein	CRHBP	P24387	ENSG00000145708	1393	HGNC:2356	rs28493768	T	C	-0.0898	0.0109653	0.18106	5	76081093	2.624e-16	TRUE	0.00189354	67.0673
6039_24	35356	CRHBP	Corticotropin-releasing factor-binding protein	CRHBP	P24387	ENSG00000145708	1393	HGNC:2356	rs28684701	A	T	-0.1538	0.0259799	0.02717	5	76617409	3.22e-09	TRUE	0.000990308	35.046
6039_24	35355	CRHBP	Corticotropin-releasing factor-binding protein	CRHBP	P24387	ENSG00000145708	1393	HGNC:2356	rs2972338	T	C	-0.2437	0.0319006	0.0185	5	76467107	2.183e-14	TRUE	0.00164805	58.3599
6039_24	35354	CRHBP	Corticotropin-releasing factor-binding protein	CRHBP	P24387	ENSG00000145708	1393	HGNC:2356	rs34469953	G	A	0.2287	0.0130828	0.11998	5	76136541	2.002e-68	TRUE	0.00856993	305.583
6039_24	35358	CRHBP	Corticotropin-releasing factor-binding protein	CRHBP	P24387	ENSG00000145708	1393	HGNC:2356	rs351873	T	C	0.0804	0.00848921	0.53143	5	76977951	2.776e-21	TRUE	0.00253054	89.6968
6039_24	35355	CRHBP	Corticotropin-releasing factor-binding protein	CRHBP	P24387	ENSG00000145708	1393	HGNC:2356	rs35857339	C	G	-0.1133	0.0190828	0.05276	5	76481807	2.898e-09	TRUE	0.000996128	35.2512
6039_24	35350	CRHBP	Corticotropin-releasing factor-binding protein	CRHBP	P24387	ENSG00000145708	1393	HGNC:2356	rs35862107	G	A	0.1123	0.0162737	0.07152	5	75761576	5.175e-12	TRUE	0.00134535	47.6195
6039_24	35355	CRHBP	Corticotropin-releasing factor-binding protein	CRHBP	P24387	ENSG00000145708	1393	HGNC:2356	rs37243	A	G	-0.064	0.00843353	0.50094	5	76014319	3.23e-14	TRUE	0.00162633	57.5892
6039_24	35353	CRHBP	Corticotropin-releasing factor-binding protein	CRHBP	P24387	ENSG00000145708	1393	HGNC:2356	rs4354017	T	A	0.0532	0.00897914	0.66436	5	76336476	3.126e-09	TRUE	0.00099202	35.1037
6039_24	35358	CRHBP	Corticotropin-releasing factor-binding protein	CRHBP	P24387	ENSG00000145708	1393	HGNC:2356	rs459107	C	T	-0.3239	0.0399902	0.01162	5	77091170	5.519e-16	TRUE	0.00185203	65.6017
6039_24	35351	CRHBP	Corticotropin-releasing factor-binding protein	CRHBP	P24387	ENSG00000145708	1393	HGNC:2356	rs4703705	C	T	-0.0593	0.00927623	0.29456	5	75606708	1.63e-10	TRUE	0.00115475	40.8664
6039_24	35354	CRHBP	Corticotropin-releasing factor-binding protein	CRHBP	P24387	ENSG00000145708	1393	HGNC:2356	rs4704392	A	G	0.0679	0.00854736	0.57011	5	76463151	1.958e-15	TRUE	0.00178192	63.1068
6039_24	35359	CRHBP	Corticotropin-releasing factor-binding protein	CRHBP	P24387	ENSG00000145708	1393	HGNC:2356	rs5000565	A	G	0.082	0.0134112	0.11176	5	76983194	9.7e-10	TRUE	0.00105622	37.3843
6039_24	35354	CRHBP	Corticotropin-releasing factor-binding protein	CRHBP	P24387	ENSG00000145708	1393	HGNC:2356	rs56235676	T	C	0.1149	0.0122319	0.13622	5	76439796	5.805e-21	TRUE	0.00248975	88.2375
6039_24	35356	CRHBP	Corticotropin-releasing factor-binding protein	CRHBP	P24387	ENSG00000145708	1393	HGNC:2356	rs56344225	A	G	-0.1404	0.0198258	0.04874	5	75627583	1.424e-12	TRUE	0.00141651	50.1504
6039_24	35354	CRHBP	Corticotropin-releasing factor-binding protein	CRHBP	P24387	ENSG00000145708	1393	HGNC:2356	rs59271908	C	T	-0.3377	0.0246017	0.03125	5	76241332	7.026e-43	TRUE	0.00530163	188.422
6039_24	35355	CRHBP	Corticotropin-releasing factor-binding protein	CRHBP	P24387	ENSG00000145708	1393	HGNC:2356	rs62362638	T	G	-0.0642	0.0102824	0.21625	5	76509757	4.274e-10	TRUE	0.00110148	38.9835
6039_24	35356	CRHBP	Corticotropin-releasing factor-binding protein	CRHBP	P24387	ENSG00000145708	1393	HGNC:2356	rs6883469	G	T	-0.0893	0.0121732	0.14054	5	76702107	2.204e-13	TRUE	0.00151983	53.814
6039_24	35354	CRHBP	Corticotropin-releasing factor-binding protein	CRHBP	P24387	ENSG00000145708	1393	HGNC:2356	rs6898345	G	A	-0.0886	0.0108483	0.18723	5	76226473	3.157e-16	TRUE	0.00188326	66.7027
6039_24	35354	CRHBP	Corticotropin-releasing factor-binding protein	CRHBP	P24387	ENSG00000145708	1393	HGNC:2356	rs73764677	T	C	0.3071	0.0298049	0.02029	5	76442160	6.783e-25	TRUE	0.0029941	106.165
6039_24	35359	CRHBP	Corticotropin-releasing factor-binding protein	CRHBP	P24387	ENSG00000145708	1393	HGNC:2356	rs74514452	G	A	0.3181	0.038874	0.01188	5	76860848	2.772e-16	TRUE	0.00189022	66.9591
6039_24	35356	CRHBP	Corticotropin-releasing factor-binding protein	CRHBP	P24387	ENSG00000145708	1393	HGNC:2356	rs75144132	A	C	0.1989	0.031757	0.01781	5	75974555	3.772e-10	TRUE	0.00110833	39.2274
6039_24	35358	CRHBP	Corticotropin-releasing factor-binding protein	CRHBP	P24387	ENSG00000145708	1393	HGNC:2356	rs75762999	C	G	0.1833	0.0243279	0.03101	5	77138590	4.9e-14	TRUE	0.00160308	56.7695
6039_24	35359	CRHBP	Corticotropin-releasing factor-binding protein	CRHBP	P24387	ENSG00000145708	1393	HGNC:2356	rs76165769	G	T	-0.0778	0.0129837	0.12228	5	75300203	2.071e-09	TRUE	0.00101449	35.9057
6039_24	35359	CRHBP	Corticotropin-releasing factor-binding protein	CRHBP	P24387	ENSG00000145708	1393	HGNC:2356	rs76355810	G	T	-0.1224	0.0179802	0.05766	5	76828702	9.932e-12	TRUE	0.00130897	46.3418
6039_24	35354	CRHBP	Corticotropin-releasing factor-binding protein	CRHBP	P24387	ENSG00000145708	1393	HGNC:2356	rs76557325	G	A	0.0894	0.0141671	0.0995	5	76299200	2.783e-10	TRUE	0.00112515	39.8213
6039_24	35355	CRHBP	Corticotropin-releasing factor-binding protein	CRHBP	P24387	ENSG00000145708	1393	HGNC:2356	rs76734461	C	A	0.1624	0.0212823	0.04008	5	76489601	2.334e-14	TRUE	0.00164435	58.2283
6039_24	35353	CRHBP	Corticotropin-releasing factor-binding protein	CRHBP	P24387	ENSG00000145708	1393	HGNC:2356	rs76909125	A	G	-0.2317	0.0233264	0.0353	5	76187893	2.992e-23	TRUE	0.00278321	98.6639
6039_24	35357	CRHBP	Corticotropin-releasing factor-binding protein	CRHBP	P24387	ENSG00000145708	1393	HGNC:2356	rs7700998	G	A	0.0591	0.00847436	0.54285	5	77147787	3.081e-12	TRUE	0.00137377	48.6364
6039_24	35353	CRHBP	Corticotropin-releasing factor-binding protein	CRHBP	P24387	ENSG00000145708	1393	HGNC:2356	rs7707827	A	G	-0.1218	0.015358	0.0834	5	76418289	2.179e-15	TRUE	0.00177603	62.8961
6039_24	35355	CRHBP	Corticotropin-releasing factor-binding protein	CRHBP	P24387	ENSG00000145708	1393	HGNC:2356	rs7708949	G	T	0.1364	0.0150329	0.08448	5	76463481	1.153e-19	TRUE	0.00232332	82.3276
6039_24	35354	CRHBP	Corticotropin-releasing factor-binding protein	CRHBP	P24387	ENSG00000145708	1393	HGNC:2356	rs77099102	G	C	-0.1644	0.0139306	0.10425	5	76369494	3.84e-32	TRUE	0.00392413	139.272
6039_24	35354	CRHBP	Corticotropin-releasing factor-binding protein	CRHBP	P24387	ENSG00000145708	1393	HGNC:2356	rs7712675	A	T	0.1913	0.0233561	0.03365	5	76138567	2.6e-16	TRUE	0.00189405	67.0854
6039_24	35354	CRHBP	Corticotropin-releasing factor-binding protein	CRHBP	P24387	ENSG00000145708	1393	HGNC:2356	rs7728378	C	T	0.0575	0.00881764	0.37245	5	76259350	6.983e-11	TRUE	0.00120142	42.5237
6039_24	35347	CRHBP	Corticotropin-releasing factor-binding protein	CRHBP	P24387	ENSG00000145708	1393	HGNC:2356	rs77307506	T	C	-0.3169	0.0351958	0.0156	5	75787017	2.178e-19	TRUE	0.00228844	81.0706
6039_24	35353	CRHBP	Corticotropin-releasing factor-binding protein	CRHBP	P24387	ENSG00000145708	1393	HGNC:2356	rs77322113	A	C	0.4379	0.0207236	0.04333	5	76192017	4.174e-99	TRUE	0.0124728	446.497
6039_24	35354	CRHBP	Corticotropin-releasing factor-binding protein	CRHBP	P24387	ENSG00000145708	1393	HGNC:2356	rs7732628	A	G	0.0501	0.00875126	0.62088	5	76435346	1.035e-08	TRUE	0.000926228	32.7744
6039_24	35354	CRHBP	Corticotropin-releasing factor-binding protein	CRHBP	P24387	ENSG00000145708	1393	HGNC:2356	rs7733448	G	A	-0.1421	0.0247349	0.03037	5	76456441	9.196e-09	TRUE	0.000932717	33.0042
6039_24	35354	CRHBP	Corticotropin-releasing factor-binding protein	CRHBP	P24387	ENSG00000145708	1393	HGNC:2356	rs7736104	G	T	-0.4129	0.0109223	0.69529	5	76160677	1e-200	TRUE	0.0388541	1429.1
6039_24	35356	CRHBP	Corticotropin-releasing factor-binding protein	CRHBP	P24387	ENSG00000145708	1393	HGNC:2356	rs77373975	C	T	0.1464	0.0205694	0.04517	5	75867877	1.1e-12	TRUE	0.0014308	50.6571
6039_24	35359	CRHBP	Corticotropin-releasing factor-binding protein	CRHBP	P24387	ENSG00000145708	1393	HGNC:2356	rs77838377	T	C	0.2581	0.0282521	0.02253	5	76982400	6.504e-20	TRUE	0.00235492	83.4593
6039_24	35355	CRHBP	Corticotropin-releasing factor-binding protein	CRHBP	P24387	ENSG00000145708	1393	HGNC:2356	rs78412187	T	C	0.4314	0.029846	0.02067	5	76231509	2.359e-47	TRUE	0.00587492	208.924
6039_24	35355	CRHBP	Corticotropin-releasing factor-binding protein	CRHBP	P24387	ENSG00000145708	1393	HGNC:2356	rs78729217	A	G	-0.1101	0.0170228	0.06448	5	76356973	9.945e-11	TRUE	0.00118187	41.8322
6039_24	35353	CRHBP	Corticotropin-releasing factor-binding protein	CRHBP	P24387	ENSG00000145708	1393	HGNC:2356	rs79287593	G	C	-0.1426	0.0240354	0.03057	5	76213189	2.976e-09	TRUE	0.000994724	35.1995
6039_24	35354	CRHBP	Corticotropin-releasing factor-binding protein	CRHBP	P24387	ENSG00000145708	1393	HGNC:2356	rs79499344	C	T	0.3041	0.0307773	0.01996	5	76381964	5.05e-23	TRUE	0.00275398	97.6274
6039_24	35352	CRHBP	Corticotropin-releasing factor-binding protein	CRHBP	P24387	ENSG00000145708	1393	HGNC:2356	rs979862	C	T	-0.0888	0.0120599	0.14498	5	75987116	1.795e-13	TRUE	0.00153138	54.2173
12687_2	35337	DECR	2,4-dienoyl-CoA reductase, mitochondrial	DECR1	Q16698	ENSG00000104325	1666	HGNC:2753	rs142705833	T	C	-0.1885	0.0274961	0.02172	8	90486954	7.106e-12	TRUE	0.0013283	46.998
12687_2	35338	DECR	2,4-dienoyl-CoA reductase, mitochondrial	DECR1	Q16698	ENSG00000104325	1666	HGNC:2753	rs147359828	A	C	-0.2327	0.0296217	0.01821	8	90806676	3.975e-15	TRUE	0.0017434	61.7122
12687_2	35336	DECR	2,4-dienoyl-CoA reductase, mitochondrial	DECR1	Q16698	ENSG00000104325	1666	HGNC:2753	rs4081549	C	T	-0.0467	0.00830207	0.34075	8	91327685	1.854e-08	TRUE	0.000894703	31.6418
12687_2	35337	DECR	2,4-dienoyl-CoA reductase, mitochondrial	DECR1	Q16698	ENSG00000104325	1666	HGNC:2753	rs72673818	T	A	-0.1874	0.0280533	0.01992	8	91155925	2.387e-11	TRUE	0.0012613	44.6244
12687_2	35337	DECR	2,4-dienoyl-CoA reductase, mitochondrial	DECR1	Q16698	ENSG00000104325	1666	HGNC:2753	rs72675636	G	T	-0.1014	0.0166404	0.0583	8	91330656	1.104e-09	TRUE	0.00104975	37.1319
12687_2	35336	DECR	2,4-dienoyl-CoA reductase, mitochondrial	DECR1	Q16698	ENSG00000104325	1666	HGNC:2753	rs77373452	A	G	-0.0835	0.0152717	0.07102	8	90878651	4.561e-08	TRUE	0.000845352	29.8949
12687_2	35336	DECR	2,4-dienoyl-CoA reductase, mitochondrial	DECR1	Q16698	ENSG00000104325	1666	HGNC:2753	rs79538928	T	C	-0.1336	0.0225985	0.02995	8	92010846	3.382e-09	TRUE	0.000988168	34.9505
12687_2	35339	DECR	2,4-dienoyl-CoA reductase, mitochondrial	DECR1	Q16698	ENSG00000104325	1666	HGNC:2753	rs9649958	G	T	-0.0684	0.00837008	0.33434	8	90970047	3.034e-16	TRUE	0.00188627	66.7811
14101_2	35351	CNTFR alpha	Ciliary neurotrophic factor receptor subunit alpha	CNTFR	P26992	ENSG00000122756	1271	HGNC:2170	rs10814234	G	C	-0.0785	0.0125455	0.12295	9	35405543	3.919e-10	TRUE	0.00110638	39.1528
14101_2	35350	CNTFR alpha	Ciliary neurotrophic factor receptor subunit alpha	CNTFR	P26992	ENSG00000122756	1271	HGNC:2170	rs10971994	A	G	0.0561	0.00829662	0.47115	9	34206206	1.363e-11	TRUE	0.0012918	45.7218
14101_2	35350	CNTFR alpha	Ciliary neurotrophic factor receptor subunit alpha	CNTFR	P26992	ENSG00000122756	1271	HGNC:2170	rs10972159	A	G	-0.5581	0.0234872	0.0311	9	34593086	8.276e-125	TRUE	0.0157223	564.628
14101_2	35349	CNTFR alpha	Ciliary neurotrophic factor receptor subunit alpha	CNTFR	P26992	ENSG00000122756	1271	HGNC:2170	rs113876479	C	T	-0.1655	0.0178932	0.05401	9	34025976	2.259e-20	TRUE	0.00241445	85.5501
14101_2	35350	CNTFR alpha	Ciliary neurotrophic factor receptor subunit alpha	CNTFR	P26992	ENSG00000122756	1271	HGNC:2170	rs117531846	T	C	-0.2557	0.0308984	0.01824	9	34924943	1.279e-16	TRUE	0.00193368	68.4842
14101_2	35349	CNTFR alpha	Ciliary neurotrophic factor receptor subunit alpha	CNTFR	P26992	ENSG00000122756	1271	HGNC:2170	rs146567295	T	C	-0.1415	0.0211929	0.03908	9	33737453	2.443e-11	TRUE	0.00125959	44.579
14101_2	35350	CNTFR alpha	Ciliary neurotrophic factor receptor subunit alpha	CNTFR	P26992	ENSG00000122756	1271	HGNC:2170	rs2183012	A	G	0.256	0.0286058	0.02192	9	34554020	3.58e-19	TRUE	0.00226059	80.0886
14101_2	35350	CNTFR alpha	Ciliary neurotrophic factor receptor subunit alpha	CNTFR	P26992	ENSG00000122756	1271	HGNC:2170	rs3808868	G	T	0.0899	0.00828818	0.46391	9	34654142	2.066e-27	TRUE	0.00331736	117.652
14101_2	35350	CNTFR alpha	Ciliary neurotrophic factor receptor subunit alpha	CNTFR	P26992	ENSG00000122756	1271	HGNC:2170	rs4395980	T	C	-0.0996	0.00928555	0.26883	9	34548009	7.657e-27	TRUE	0.00324434	115.054
14101_2	35350	CNTFR alpha	Ciliary neurotrophic factor receptor subunit alpha	CNTFR	P26992	ENSG00000122756	1271	HGNC:2170	rs4879805	A	G	-0.1757	0.0107581	0.17269	9	34564274	5.849e-60	TRUE	0.00748938	266.732
14101_2	35350	CNTFR alpha	Ciliary neurotrophic factor receptor subunit alpha	CNTFR	P26992	ENSG00000122756	1271	HGNC:2170	rs577442	G	A	-0.1835	0.0159513	0.06868	9	34768595	1.263e-30	TRUE	0.00372985	132.336
14101_2	35349	CNTFR alpha	Ciliary neurotrophic factor receptor subunit alpha	CNTFR	P26992	ENSG00000122756	1271	HGNC:2170	rs6476435	A	T	-0.0644	0.00887899	0.6874	9	34081739	4.074e-13	TRUE	0.00148609	52.6072
14101_2	35350	CNTFR alpha	Ciliary neurotrophic factor receptor subunit alpha	CNTFR	P26992	ENSG00000122756	1271	HGNC:2170	rs67752843	T	C	0.0869	0.0109997	0.17147	9	34507173	2.785e-15	TRUE	0.00176256	62.4129
14101_2	35350	CNTFR alpha	Ciliary neurotrophic factor receptor subunit alpha	CNTFR	P26992	ENSG00000122756	1271	HGNC:2170	rs72737107	C	T	-0.2068	0.0164378	0.0671	9	34583281	2.694e-36	TRUE	0.00445768	158.276
14101_2	35351	CNTFR alpha	Ciliary neurotrophic factor receptor subunit alpha	CNTFR	P26992	ENSG00000122756	1271	HGNC:2170	rs74423747	T	C	-0.1445	0.0185952	0.05086	9	34964050	7.799e-15	TRUE	0.00170535	60.3854
14101_2	35351	CNTFR alpha	Ciliary neurotrophic factor receptor subunit alpha	CNTFR	P26992	ENSG00000122756	1271	HGNC:2170	rs75143852	A	T	-0.2167	0.0373929	0.01209	9	35485954	6.823e-09	TRUE	0.000949185	33.5846
14101_2	35350	CNTFR alpha	Ciliary neurotrophic factor receptor subunit alpha	CNTFR	P26992	ENSG00000122756	1271	HGNC:2170	rs7852999	G	A	0.0469	0.00843811	0.38673	9	35114394	2.727e-08	TRUE	0.000873195	30.8927
14101_2	35345	CNTFR alpha	Ciliary neurotrophic factor receptor subunit alpha	CNTFR	P26992	ENSG00000122756	1271	HGNC:2170	rs855512	G	A	0.0464	0.00824071	0.51216	9	33618358	1.796e-08	TRUE	0.000896219	31.7035
3166_92	35383	Siglec-3	Myeloid cell surface antigen CD33	CD33	P20138	ENSG00000105383	945	HGNC:1659	rs10414347	T	C	-0.0904	0.0159801	0.10442	19	52127777	1.54e-08	TRUE	0.000903684	32.0022
3166_92	35375	Siglec-3	Myeloid cell surface antigen CD33	CD33	P20138	ENSG00000105383	945	HGNC:1659	rs10417413	C	A	0.4422	0.0238844	0.04343	19	51704832	1.588e-76	TRUE	0.00959726	342.774
3166_92	35376	Siglec-3	Myeloid cell surface antigen CD33	CD33	P20138	ENSG00000105383	945	HGNC:1659	rs10418724	A	G	0.058	0.0101484	0.37811	19	51557159	1.096e-08	TRUE	0.000922512	32.6631
3166_92	35373	Siglec-3	Myeloid cell surface antigen CD33	CD33	P20138	ENSG00000105383	945	HGNC:1659	rs10419846	C	T	0.1925	0.0316515	0.02508	19	51168416	1.188e-09	TRUE	0.00104465	36.989
3166_92	35382	Siglec-3	Myeloid cell surface antigen CD33	CD33	P20138	ENSG00000105383	945	HGNC:1659	rs10421473	T	G	0.0668	0.00986462	0.5346	19	52186271	1.273e-11	TRUE	0.00129441	45.8556
3166_92	35380	Siglec-3	Myeloid cell surface antigen CD33	CD33	P20138	ENSG00000105383	945	HGNC:1659	rs10424044	C	G	-0.0927	0.0109564	0.7236	19	52239177	2.655e-17	TRUE	0.00201936	71.5855
3166_92	35384	Siglec-3	Myeloid cell surface antigen CD33	CD33	P20138	ENSG00000105383	945	HGNC:1659	rs10426927	T	C	0.192	0.0169304	0.90699	19	52051780	8.261e-30	TRUE	0.00362169	128.608
3166_92	35369	Siglec-3	Myeloid cell surface antigen CD33	CD33	P20138	ENSG00000105383	945	HGNC:1659	rs1048344	C	T	0.1287	0.0136551	0.15438	19	51525703	4.3e-21	TRUE	0.0025054	88.8311
3166_92	35377	Siglec-3	Myeloid cell surface antigen CD33	CD33	P20138	ENSG00000105383	945	HGNC:1659	rs111298687	G	A	0.3366	0.0361578	0.01833	19	51899155	1.288e-20	TRUE	0.0024438	86.6612
3166_92	35382	Siglec-3	Myeloid cell surface antigen CD33	CD33	P20138	ENSG00000105383	945	HGNC:1659	rs111748930	A	G	-0.1357	0.02126	0.05597	19	51987701	1.738e-10	TRUE	0.0011502	40.741
3166_92	35372	Siglec-3	Myeloid cell surface antigen CD33	CD33	P20138	ENSG00000105383	945	HGNC:1659	rs111774908	G	A	0.2081	0.0261824	0.03497	19	51654368	1.894e-15	TRUE	0.00178286	63.1722
3166_92	35375	Siglec-3	Myeloid cell surface antigen CD33	CD33	P20138	ENSG00000105383	945	HGNC:1659	rs111784580	T	C	-0.8775	0.0324274	0.02279	19	51709464	2.88e-161	TRUE	0.0202814	732.266
3166_92	35379	Siglec-3	Myeloid cell surface antigen CD33	CD33	P20138	ENSG00000105383	945	HGNC:1659	rs112591851	T	C	0.2252	0.0202648	0.06075	19	52252384	1.086e-28	TRUE	0.00347871	123.496
3166_92	35384	Siglec-3	Myeloid cell surface antigen CD33	CD33	P20138	ENSG00000105383	945	HGNC:1659	rs112735728	C	T	0.2127	0.0292664	0.03053	19	52087349	3.656e-13	TRUE	0.00149062	52.8198
3166_92	35377	Siglec-3	Myeloid cell surface antigen CD33	CD33	P20138	ENSG00000105383	945	HGNC:1659	rs113518563	T	G	0.2739	0.0231568	0.04792	19	51720881	2.795e-32	TRUE	0.00393928	139.903
3166_92	35385	Siglec-3	Myeloid cell surface antigen CD33	CD33	P20138	ENSG00000105383	945	HGNC:1659	rs113819549	G	A	-0.1095	0.0154861	0.11327	19	52382754	1.54e-12	TRUE	0.00141102	49.9968
3166_92	35372	Siglec-3	Myeloid cell surface antigen CD33	CD33	P20138	ENSG00000105383	945	HGNC:1659	rs113834059	A	C	-0.2004	0.0335442	0.02061	19	51155322	2.312e-09	TRUE	0.00100807	35.6913
3166_92	35375	Siglec-3	Myeloid cell surface antigen CD33	CD33	P20138	ENSG00000105383	945	HGNC:1659	rs113853183	A	C	0.414	0.0463554	0.01181	19	51681357	4.222e-19	TRUE	0.00224983	79.7626
3166_92	35382	Siglec-3	Myeloid cell surface antigen CD33	CD33	P20138	ENSG00000105383	945	HGNC:1659	rs113899607	T	C	0.3642	0.0303651	0.02701	19	52181589	3.818e-33	TRUE	0.00404959	143.857
3166_92	35370	Siglec-3	Myeloid cell surface antigen CD33	CD33	P20138	ENSG00000105383	945	HGNC:1659	rs1139132	T	G	-0.1332	0.01041	0.34022	19	51409763	1.74e-37	TRUE	0.00460776	163.722
3166_92	35373	Siglec-3	Myeloid cell surface antigen CD33	CD33	P20138	ENSG00000105383	945	HGNC:1659	rs1150928	A	G	0.0992	0.0176205	0.08447	19	51033388	1.804e-08	TRUE	0.000895267	31.6948
3166_92	35371	Siglec-3	Myeloid cell surface antigen CD33	CD33	P20138	ENSG00000105383	945	HGNC:1659	rs116241073	A	G	-0.1697	0.0242066	0.04225	19	51306921	2.375e-12	TRUE	0.00138762	49.1468
3166_92	35384	Siglec-3	Myeloid cell surface antigen CD33	CD33	P20138	ENSG00000105383	945	HGNC:1659	rs11670747	T	C	-0.1197	0.0133499	0.16009	19	52296964	3.064e-19	TRUE	0.00226708	80.3961
3166_92	35377	Siglec-3	Myeloid cell surface antigen CD33	CD33	P20138	ENSG00000105383	945	HGNC:1659	rs11671745	T	A	-0.1425	0.0256194	0.0379	19	51552977	2.664e-08	TRUE	0.000873809	30.938
3166_92	35378	Siglec-3	Myeloid cell surface antigen CD33	CD33	P20138	ENSG00000105383	945	HGNC:1659	rs11672925	C	A	-0.0602	0.00996617	0.42033	19	51967867	1.537e-09	TRUE	0.00103034	36.4868
3166_92	35370	Siglec-3	Myeloid cell surface antigen CD33	CD33	P20138	ENSG00000105383	945	HGNC:1659	rs116947194	A	C	0.2927	0.0409974	0.0143	19	51422962	9.369e-13	TRUE	0.00143912	50.9721
3166_92	35385	Siglec-3	Myeloid cell surface antigen CD33	CD33	P20138	ENSG00000105383	945	HGNC:1659	rs117020806	C	T	0.2151	0.0323546	0.02391	19	52625033	2.967e-11	TRUE	0.00124759	44.1986
3166_92	35369	Siglec-3	Myeloid cell surface antigen CD33	CD33	P20138	ENSG00000105383	945	HGNC:1659	rs117145941	G	T	-0.4111	0.0472486	0.01126	19	51433234	3.296e-18	TRUE	0.00213594	75.7036
3166_92	35374	Siglec-3	Myeloid cell surface antigen CD33	CD33	P20138	ENSG00000105383	945	HGNC:1659	rs117229324	T	C	-0.2484	0.0312382	0.02583	19	51585978	1.838e-15	TRUE	0.00178442	63.2313
3166_92	35386	Siglec-3	Myeloid cell surface antigen CD33	CD33	P20138	ENSG00000105383	945	HGNC:1659	rs117384629	C	T	-0.2358	0.035145	0.02044	19	52604770	1.955e-11	TRUE	0.00127058	45.0153
3166_92	35379	Siglec-3	Myeloid cell surface antigen CD33	CD33	P20138	ENSG00000105383	945	HGNC:1659	rs117488111	T	C	0.467	0.0305012	0.02693	19	51859666	6.469e-53	TRUE	0.0065828	234.423
3166_92	35377	Siglec-3	Myeloid cell surface antigen CD33	CD33	P20138	ENSG00000105383	945	HGNC:1659	rs117533019	T	C	0.3816	0.0360994	0.01919	19	51725898	4.069e-26	TRUE	0.00314885	111.742
3166_92	35380	Siglec-3	Myeloid cell surface antigen CD33	CD33	P20138	ENSG00000105383	945	HGNC:1659	rs117572061	T	C	-0.3538	0.048859	0.01054	19	52224205	4.446e-13	TRUE	0.00147996	52.4356
3166_92	35388	Siglec-3	Myeloid cell surface antigen CD33	CD33	P20138	ENSG00000105383	945	HGNC:1659	rs117633649	T	C	-0.3238	0.0496303	0.01006	19	52537334	6.835e-11	TRUE	0.00120145	42.5656
3166_92	35374	Siglec-3	Myeloid cell surface antigen CD33	CD33	P20138	ENSG00000105383	945	HGNC:1659	rs117711212	T	C	-0.3711	0.0457869	0.01096	19	51009421	5.277e-16	TRUE	0.00185368	65.6901
3166_92	35374	Siglec-3	Myeloid cell surface antigen CD33	CD33	P20138	ENSG00000105383	945	HGNC:1659	rs117747751	A	G	-0.3671	0.034659	0.02067	19	51599029	3.254e-26	TRUE	0.00316156	112.185
3166_92	35363	Siglec-3	Myeloid cell surface antigen CD33	CD33	P20138	ENSG00000105383	945	HGNC:1659	rs117794237	A	C	0.2668	0.04239	0.01314	19	51298505	3.095e-10	TRUE	0.00111901	39.6137
3166_92	35373	Siglec-3	Myeloid cell surface antigen CD33	CD33	P20138	ENSG00000105383	945	HGNC:1659	rs117865974	C	T	-0.1321	0.0202958	0.06273	19	51596892	7.579e-11	TRUE	0.00119626	42.3635
3166_92	35375	Siglec-3	Myeloid cell surface antigen CD33	CD33	P20138	ENSG00000105383	945	HGNC:1659	rs117890325	A	C	0.2916	0.0394833	0.01513	19	51703385	1.52e-13	TRUE	0.0015396	54.5441
3166_92	35373	Siglec-3	Myeloid cell surface antigen CD33	CD33	P20138	ENSG00000105383	945	HGNC:1659	rs117990326	T	C	0.172	0.0285266	0.02978	19	51172616	1.645e-09	TRUE	0.00102675	36.3545
3166_92	35370	Siglec-3	Myeloid cell surface antigen CD33	CD33	P20138	ENSG00000105383	945	HGNC:1659	rs118107605	T	G	0.2085	0.0292929	0.02892	19	51413154	1.097e-12	TRUE	0.00143039	50.6624
3166_92	35368	Siglec-3	Myeloid cell surface antigen CD33	CD33	P20138	ENSG00000105383	945	HGNC:1659	rs118130192	T	C	-0.2676	0.0370413	0.01888	19	51242693	5.034e-13	TRUE	0.00147358	52.1916
3166_92	35378	Siglec-3	Myeloid cell surface antigen CD33	CD33	P20138	ENSG00000105383	945	HGNC:1659	rs11881372	A	C	0.2406	0.0103456	0.33139	19	51860656	1.231e-119	TRUE	0.0150584	540.851
3166_92	35362	Siglec-3	Myeloid cell surface antigen CD33	CD33	P20138	ENSG00000105383	945	HGNC:1659	rs11882802	T	G	-0.061	0.0103237	0.34623	19	51289858	3.448e-09	TRUE	0.00098638	34.9128
3166_92	35386	Siglec-3	Myeloid cell surface antigen CD33	CD33	P20138	ENSG00000105383	945	HGNC:1659	rs12459126	C	G	-0.2167	0.0199336	0.06469	19	52332884	1.583e-27	TRUE	0.00332883	118.181
3166_92	35379	Siglec-3	Myeloid cell surface antigen CD33	CD33	P20138	ENSG00000105383	945	HGNC:1659	rs12463376	A	G	0.3444	0.00964848	0.5258	19	51838648	1e-200	TRUE	0.0347633	1274.12
3166_92	35369	Siglec-3	Myeloid cell surface antigen CD33	CD33	P20138	ENSG00000105383	945	HGNC:1659	rs12975345	G	A	0.0616	0.0109075	0.28123	19	51191172	1.628e-08	TRUE	0.000900995	31.8942
3166_92	35372	Siglec-3	Myeloid cell surface antigen CD33	CD33	P20138	ENSG00000105383	945	HGNC:1659	rs13346921	A	G	0.1176	0.0118135	0.22073	19	51160001	2.405e-23	TRUE	0.00279388	99.0964
3166_92	35379	Siglec-3	Myeloid cell surface antigen CD33	CD33	P20138	ENSG00000105383	945	HGNC:1659	rs138326547	T	C	0.1392	0.0223396	0.05283	19	51856211	4.632e-10	TRUE	0.0010963	38.8265
3166_92	35361	Siglec-3	Myeloid cell surface antigen CD33	CD33	P20138	ENSG00000105383	945	HGNC:1659	rs138434109	T	C	-0.4275	0.0479678	0.01035	19	51454773	5.002e-19	TRUE	0.00224129	79.4277
3166_92	35378	Siglec-3	Myeloid cell surface antigen CD33	CD33	P20138	ENSG00000105383	945	HGNC:1659	rs139747310	C	A	-0.2248	0.0242253	0.04271	19	51906057	1.702e-20	TRUE	0.00242823	86.11
3166_92	35374	Siglec-3	Myeloid cell surface antigen CD33	CD33	P20138	ENSG00000105383	945	HGNC:1659	rs139911883	C	T	0.3038	0.0384129	0.01665	19	51588434	2.599e-15	TRUE	0.0017652	62.549
3166_92	35372	Siglec-3	Myeloid cell surface antigen CD33	CD33	P20138	ENSG00000105383	945	HGNC:1659	rs140185670	C	G	-0.4223	0.0173129	0.08558	19	51646140	2.07e-131	TRUE	0.0165433	594.979
3166_92	35377	Siglec-3	Myeloid cell surface antigen CD33	CD33	P20138	ENSG00000105383	945	HGNC:1659	rs1404318	G	A	-0.1202	0.00980851	0.49397	19	51566231	1.586e-34	TRUE	0.00422734	150.177
3166_92	35380	Siglec-3	Myeloid cell surface antigen CD33	CD33	P20138	ENSG00000105383	945	HGNC:1659	rs140829879	G	T	0.4429	0.0287807	0.03	19	51771322	1.947e-53	TRUE	0.00664932	236.814
3166_92	35383	Siglec-3	Myeloid cell surface antigen CD33	CD33	P20138	ENSG00000105383	945	HGNC:1659	rs141779061	T	C	0.4255	0.0457274	0.01154	19	52101110	1.338e-20	TRUE	0.00244127	86.5859
3166_92	35374	Siglec-3	Myeloid cell surface antigen CD33	CD33	P20138	ENSG00000105383	945	HGNC:1659	rs143774589	G	C	0.3141	0.035852	0.02112	19	51594951	1.935e-18	TRUE	0.00216525	76.7554
3166_92	35377	Siglec-3	Myeloid cell surface antigen CD33	CD33	P20138	ENSG00000105383	945	HGNC:1659	rs144063168	C	T	-0.3542	0.0347921	0.02017	19	51884376	2.424e-24	TRUE	0.00292125	103.642
3166_92	35371	Siglec-3	Myeloid cell surface antigen CD33	CD33	P20138	ENSG00000105383	945	HGNC:1659	rs144748691	A	G	-0.1364	0.0211011	0.05712	19	50809274	1.019e-10	TRUE	0.00118	41.7847
3166_92	35374	Siglec-3	Myeloid cell surface antigen CD33	CD33	P20138	ENSG00000105383	945	HGNC:1659	rs145396720	T	C	-0.242	0.0354322	0.01995	19	51574913	8.495e-12	TRUE	0.00131705	46.6481
3166_92	35374	Siglec-3	Myeloid cell surface antigen CD33	CD33	P20138	ENSG00000105383	945	HGNC:1659	rs145445360	A	G	-0.2953	0.043102	0.01287	19	51614037	7.324e-12	TRUE	0.00132524	46.9388
3166_92	35378	Siglec-3	Myeloid cell surface antigen CD33	CD33	P20138	ENSG00000105383	945	HGNC:1659	rs145668762	T	C	0.3233	0.04686	0.01085	19	51751925	5.227e-12	TRUE	0.00134374	47.5999
3166_92	35384	Siglec-3	Myeloid cell surface antigen CD33	CD33	P20138	ENSG00000105383	945	HGNC:1659	rs145713288	C	T	0.1933	0.0350759	0.02014	19	52052302	3.57e-08	TRUE	0.000857611	30.37
3166_92	35363	Siglec-3	Myeloid cell surface antigen CD33	CD33	P20138	ENSG00000105383	945	HGNC:1659	rs146065264	T	C	0.2534	0.0302755	0.02579	19	51261274	5.771e-17	TRUE	0.00197719	70.0538
3166_92	35383	Siglec-3	Myeloid cell surface antigen CD33	CD33	P20138	ENSG00000105383	945	HGNC:1659	rs146864876	G	A	-0.2577	0.0283719	0.02966	19	52102427	1.057e-19	TRUE	0.00232632	82.4994
3166_92	35377	Siglec-3	Myeloid cell surface antigen CD33	CD33	P20138	ENSG00000105383	945	HGNC:1659	rs147321547	T	C	-0.2329	0.012579	0.18788	19	51883001	1.562e-76	TRUE	0.00959763	342.806
3166_92	35372	Siglec-3	Myeloid cell surface antigen CD33	CD33	P20138	ENSG00000105383	945	HGNC:1659	rs147395892	T	C	-0.3828	0.0317248	0.02372	19	51629444	1.592e-33	TRUE	0.00409946	145.595
3166_92	35367	Siglec-3	Myeloid cell surface antigen CD33	CD33	P20138	ENSG00000105383	945	HGNC:1659	rs148022792	A	G	-0.1909	0.0315406	0.02507	19	51482951	1.426e-09	TRUE	0.00103478	36.633
3166_92	35363	Siglec-3	Myeloid cell surface antigen CD33	CD33	P20138	ENSG00000105383	945	HGNC:1659	rs148683142	T	C	-0.197	0.0298948	0.0302	19	51271096	4.405e-11	TRUE	0.00122654	43.4251
3166_92	35371	Siglec-3	Myeloid cell surface antigen CD33	CD33	P20138	ENSG00000105383	945	HGNC:1659	rs148701654	A	G	-0.2432	0.0342659	0.02108	19	51415705	1.271e-12	TRUE	0.0014222	50.3735
3166_92	35383	Siglec-3	Myeloid cell surface antigen CD33	CD33	P20138	ENSG00000105383	945	HGNC:1659	rs148809065	T	C	-0.5649	0.0280275	0.03191	19	52004878	2.423e-90	TRUE	0.0113513	406.232
3166_92	35384	Siglec-3	Myeloid cell surface antigen CD33	CD33	P20138	ENSG00000105383	945	HGNC:1659	rs148948567	A	T	-0.177	0.0137659	0.14879	19	52085656	7.767e-38	TRUE	0.00465085	165.325
3166_92	35379	Siglec-3	Myeloid cell surface antigen CD33	CD33	P20138	ENSG00000105383	945	HGNC:1659	rs149831455	T	C	0.2239	0.0258921	0.03712	19	51854000	5.267e-18	TRUE	0.00210929	74.7781
3166_92	35386	Siglec-3	Myeloid cell surface antigen CD33	CD33	P20138	ENSG00000105383	945	HGNC:1659	rs1549932	A	G	-0.1084	0.0161864	0.89995	19	52455249	2.128e-11	TRUE	0.0012659	44.8493
3166_92	35381	Siglec-3	Myeloid cell surface antigen CD33	CD33	P20138	ENSG00000105383	945	HGNC:1659	rs1551156	G	T	0.1096	0.0113168	0.74582	19	52230483	3.503e-22	TRUE	0.00264408	93.793
3166_92	35379	Siglec-3	Myeloid cell surface antigen CD33	CD33	P20138	ENSG00000105383	945	HGNC:1659	rs1697566	T	C	-0.3957	0.0104673	0.59194	19	51765953	1e-200	TRUE	0.0388277	1429.1
3166_92	35375	Siglec-3	Myeloid cell surface antigen CD33	CD33	P20138	ENSG00000105383	945	HGNC:1659	rs16982527	G	C	-0.1571	0.0237159	0.0452	19	51679237	3.49e-11	TRUE	0.00123898	43.8808
3166_92	35380	Siglec-3	Myeloid cell surface antigen CD33	CD33	P20138	ENSG00000105383	945	HGNC:1659	rs17716134	T	C	-0.6776	0.0214035	0.05411	19	51785146	1e-200	TRUE	0.0275494	1002.25
3166_92	35377	Siglec-3	Myeloid cell surface antigen CD33	CD33	P20138	ENSG00000105383	945	HGNC:1659	rs17716574	T	G	-0.1397	0.0223053	0.05261	19	51906970	3.774e-10	TRUE	0.00110765	39.2264
3166_92	35380	Siglec-3	Myeloid cell surface antigen CD33	CD33	P20138	ENSG00000105383	945	HGNC:1659	rs17717333	T	C	-0.1651	0.0237598	0.04375	19	52158202	3.686e-12	TRUE	0.00136297	48.2848
3166_92	35375	Siglec-3	Myeloid cell surface antigen CD33	CD33	P20138	ENSG00000105383	945	HGNC:1659	rs17728644	G	A	0.355	0.028193	0.03147	19	51677700	2.344e-36	TRUE	0.0044623	158.552
3166_92	35375	Siglec-3	Myeloid cell surface antigen CD33	CD33	P20138	ENSG00000105383	945	HGNC:1659	rs17801681	T	C	0.4072	0.0287347	0.03002	19	51676649	1.385e-45	TRUE	0.00564509	200.817
3166_92	35378	Siglec-3	Myeloid cell surface antigen CD33	CD33	P20138	ENSG00000105383	945	HGNC:1659	rs180985088	T	C	-0.4399	0.0345117	0.0205	19	51910363	3.265e-37	TRUE	0.00457168	162.471
3166_92	35378	Siglec-3	Myeloid cell surface antigen CD33	CD33	P20138	ENSG00000105383	945	HGNC:1659	rs181301509	T	C	0.483	0.0280484	0.0311	19	51870122	1.873e-66	TRUE	0.00831272	296.536
3166_92	35381	Siglec-3	Myeloid cell surface antigen CD33	CD33	P20138	ENSG00000105383	945	HGNC:1659	rs1821278	G	A	-0.0711	0.0112424	0.26037	19	52659991	2.544e-10	TRUE	0.00112924	39.9966
3166_92	35382	Siglec-3	Myeloid cell surface antigen CD33	CD33	P20138	ENSG00000105383	945	HGNC:1659	rs183237225	A	G	-0.2154	0.036123	0.01945	19	52182276	2.477e-09	TRUE	0.00100399	35.557
3166_92	35363	Siglec-3	Myeloid cell surface antigen CD33	CD33	P20138	ENSG00000105383	945	HGNC:1659	rs185843480	C	T	0.3071	0.0432498	0.01265	19	51252604	1.242e-12	TRUE	0.0014238	50.4188
3166_92	35371	Siglec-3	Myeloid cell surface antigen CD33	CD33	P20138	ENSG00000105383	945	HGNC:1659	rs192345187	T	C	0.2783	0.0426093	0.01316	19	51339531	6.514e-11	TRUE	0.00120468	42.6597
3166_92	35379	Siglec-3	Myeloid cell surface antigen CD33	CD33	P20138	ENSG00000105383	945	HGNC:1659	rs192733404	T	C	-0.3195	0.0344816	0.01893	19	51859425	1.936e-20	TRUE	0.00242099	85.8553
3166_92	35378	Siglec-3	Myeloid cell surface antigen CD33	CD33	P20138	ENSG00000105383	945	HGNC:1659	rs1968241	G	A	0.1209	0.0135287	0.84524	19	51866955	4.014e-19	TRUE	0.00225245	79.8625
3166_92	35372	Siglec-3	Myeloid cell surface antigen CD33	CD33	P20138	ENSG00000105383	945	HGNC:1659	rs198977	T	C	-0.0783	0.0117701	0.22183	19	51381777	2.883e-11	TRUE	0.00124963	44.2548
3166_92	35380	Siglec-3	Myeloid cell surface antigen CD33	CD33	P20138	ENSG00000105383	945	HGNC:1659	rs2305372	T	A	0.2101	0.0251821	0.04082	19	52132325	7.228e-17	TRUE	0.00196374	69.6097
3166_92	35373	Siglec-3	Myeloid cell surface antigen CD33	CD33	P20138	ENSG00000105383	945	HGNC:1659	rs2569487	A	G	0.1261	0.0106932	0.30467	19	51578855	4.266e-32	TRUE	0.00391617	139.063
3166_92	35365	Siglec-3	Myeloid cell surface antigen CD33	CD33	P20138	ENSG00000105383	945	HGNC:1659	rs2659091	G	A	0.1033	0.0100135	0.60448	19	51446530	5.96e-25	TRUE	0.00300038	106.422
3166_92	35371	Siglec-3	Myeloid cell surface antigen CD33	CD33	P20138	ENSG00000105383	945	HGNC:1659	rs266855	G	A	-0.0595	0.0107159	0.70166	19	51338384	2.816e-08	TRUE	0.000870918	30.8303
3166_92	35370	Siglec-3	Myeloid cell surface antigen CD33	CD33	P20138	ENSG00000105383	945	HGNC:1659	rs266879	G	C	0.0927	0.0100681	0.39085	19	51358638	3.343e-20	TRUE	0.00239121	84.7751
3166_92	35362	Siglec-3	Myeloid cell surface antigen CD33	CD33	P20138	ENSG00000105383	945	HGNC:1659	rs268887	G	A	0.0614	0.00993708	0.42543	19	51460482	6.456e-10	TRUE	0.00107854	38.1785
3166_92	35377	Siglec-3	Myeloid cell surface antigen CD33	CD33	P20138	ENSG00000105383	945	HGNC:1659	rs273635	A	G	-0.4417	0.0120321	0.79997	19	51718867	1e-200	TRUE	0.0366975	1347.63
3166_92	35365	Siglec-3	Myeloid cell surface antigen CD33	CD33	P20138	ENSG00000105383	945	HGNC:1659	rs2739441	G	T	-0.0572	0.00975379	0.49912	19	51545118	4.508e-09	TRUE	0.000971569	34.391
3166_92	35371	Siglec-3	Myeloid cell surface antigen CD33	CD33	P20138	ENSG00000105383	945	HGNC:1659	rs2739443	A	G	-0.1675	0.0160383	0.10566	19	51341326	1.565e-25	TRUE	0.00307435	109.072
3166_92	35379	Siglec-3	Myeloid cell surface antigen CD33	CD33	P20138	ENSG00000105383	945	HGNC:1659	rs28930680	G	A	0.1754	0.0256958	0.03883	19	52249942	8.73e-12	TRUE	0.00131536	46.5946
3166_92	35367	Siglec-3	Myeloid cell surface antigen CD33	CD33	P20138	ENSG00000105383	945	HGNC:1659	rs34292720	A	G	-0.0978	0.0104505	0.33066	19	51244771	8.096e-21	TRUE	0.00247033	87.5795
3166_92	35385	Siglec-3	Myeloid cell surface antigen CD33	CD33	P20138	ENSG00000105383	945	HGNC:1659	rs34342096	G	A	0.2488	0.0391094	0.01569	19	52047972	1.996e-10	TRUE	0.00114248	40.4706
3166_92	35371	Siglec-3	Myeloid cell surface antigen CD33	CD33	P20138	ENSG00000105383	945	HGNC:1659	rs34750956	T	C	-0.1057	0.0157955	0.10775	19	51361996	2.205e-11	TRUE	0.00126447	44.7797
3166_92	35379	Siglec-3	Myeloid cell surface antigen CD33	CD33	P20138	ENSG00000105383	945	HGNC:1659	rs36078694	G	A	-0.5734	0.0214478	0.05228	19	51796459	1.861e-157	TRUE	0.0198035	714.743
3166_92	35380	Siglec-3	Myeloid cell surface antigen CD33	CD33	P20138	ENSG00000105383	945	HGNC:1659	rs36493	T	C	-0.0978	0.0129828	0.1731	19	51958452	4.957e-14	TRUE	0.00160144	56.7468
3166_92	35378	Siglec-3	Myeloid cell surface antigen CD33	CD33	P20138	ENSG00000105383	945	HGNC:1659	rs36501	C	A	0.4373	0.0466869	0.01099	19	51969796	7.487e-21	TRUE	0.00247391	87.7342
3166_92	35372	Siglec-3	Myeloid cell surface antigen CD33	CD33	P20138	ENSG00000105383	945	HGNC:1659	rs3760724	G	A	-0.1659	0.0142829	0.13866	19	51374047	3.446e-31	TRUE	0.0037999	134.915
3166_92	35365	Siglec-3	Myeloid cell surface antigen CD33	CD33	P20138	ENSG00000105383	945	HGNC:1659	rs3859452	G	A	0.1288	0.010048	0.61402	19	51548548	1.292e-37	TRUE	0.00462499	164.314
3166_92	35377	Siglec-3	Myeloid cell surface antigen CD33	CD33	P20138	ENSG00000105383	945	HGNC:1659	rs45580238	T	C	-0.4091	0.0379915	0.01686	19	52216722	4.865e-27	TRUE	0.00326714	115.954
3166_92	35375	Siglec-3	Myeloid cell surface antigen CD33	CD33	P20138	ENSG00000105383	945	HGNC:1659	rs4802771	C	T	0.3205	0.0100731	0.35488	19	51677669	1e-200	TRUE	0.027823	1012.35
3166_92	35384	Siglec-3	Myeloid cell surface antigen CD33	CD33	P20138	ENSG00000105383	945	HGNC:1659	rs4802815	G	A	-0.1246	0.011002	0.7198	19	52085520	9.842e-30	TRUE	0.00361194	128.261
3166_92	35383	Siglec-3	Myeloid cell surface antigen CD33	CD33	P20138	ENSG00000105383	945	HGNC:1659	rs4802825	G	C	-0.092	0.0113156	0.7445	19	52106339	4.279e-16	TRUE	0.00186484	66.1033
3166_92	35378	Siglec-3	Myeloid cell surface antigen CD33	CD33	P20138	ENSG00000105383	945	HGNC:1659	rs5026035	T	C	-0.1071	0.010032	0.4074	19	51874741	1.321e-26	TRUE	0.00321141	113.973
3166_92	35379	Siglec-3	Myeloid cell surface antigen CD33	CD33	P20138	ENSG00000105383	945	HGNC:1659	rs5030878	G	A	-0.093	0.0115733	0.77001	19	52250216	9.302e-16	TRUE	0.00182196	64.573
3166_92	35362	Siglec-3	Myeloid cell surface antigen CD33	CD33	P20138	ENSG00000105383	945	HGNC:1659	rs56321832	A	T	0.113	0.0132461	0.16323	19	51249246	1.453e-17	TRUE	0.00205389	72.7751
3166_92	35372	Siglec-3	Myeloid cell surface antigen CD33	CD33	P20138	ENSG00000105383	945	HGNC:1659	rs60246192	A	G	0.0807	0.0106755	0.29852	19	51069146	4.05e-14	TRUE	0.00161301	57.1442
3166_92	35374	Siglec-3	Myeloid cell surface antigen CD33	CD33	P20138	ENSG00000105383	945	HGNC:1659	rs60650416	G	A	0.4393	0.0192852	0.06738	19	51678591	7.385e-115	TRUE	0.0144574	518.889
3166_92	35374	Siglec-3	Myeloid cell surface antigen CD33	CD33	P20138	ENSG00000105383	945	HGNC:1659	rs62114144	A	G	-0.133	0.0125063	0.18904	19	51585139	2.056e-26	TRUE	0.00318713	113.096
3166_92	35362	Siglec-3	Myeloid cell surface antigen CD33	CD33	P20138	ENSG00000105383	945	HGNC:1659	rs62114345	A	G	-0.2726	0.037431	0.01806	19	51299624	3.271e-13	TRUE	0.00149771	53.0383
3166_92	35379	Siglec-3	Myeloid cell surface antigen CD33	CD33	P20138	ENSG00000105383	945	HGNC:1659	rs62115998	C	G	-0.7436	0.034934	0.01958	19	51761591	1.535e-100	TRUE	0.0126455	453.088
3166_92	35385	Siglec-3	Myeloid cell surface antigen CD33	CD33	P20138	ENSG00000105383	945	HGNC:1659	rs62617068	A	C	-0.2314	0.0366222	0.01818	19	52034549	2.64e-10	TRUE	0.00112707	39.9243
3166_92	35377	Siglec-3	Myeloid cell surface antigen CD33	CD33	P20138	ENSG00000105383	945	HGNC:1659	rs6509517	T	A	-0.1856	0.0308248	0.97334	19	51552648	1.732e-09	TRUE	0.0010238	36.254
3166_92	35381	Siglec-3	Myeloid cell surface antigen CD33	CD33	P20138	ENSG00000105383	945	HGNC:1659	rs6509539	T	C	0.125	0.0227204	0.05005	19	51951171	3.762e-08	TRUE	0.000854817	30.2684
3166_92	35374	Siglec-3	Myeloid cell surface antigen CD33	CD33	P20138	ENSG00000105383	945	HGNC:1659	rs678401	G	T	0.0802	0.0104085	0.66697	19	50794784	1.306e-14	TRUE	0.00167565	59.3707
3166_92	35373	Siglec-3	Myeloid cell surface antigen CD33	CD33	P20138	ENSG00000105383	945	HGNC:1659	rs71355161	T	C	-0.3347	0.0482943	0.01008	19	51156443	4.196e-12	TRUE	0.00135607	48.0307
3166_92	35376	Siglec-3	Myeloid cell surface antigen CD33	CD33	P20138	ENSG00000105383	945	HGNC:1659	rs71358807	C	G	-0.1427	0.0173004	0.08689	19	51561333	1.606e-16	TRUE	0.00191962	68.0352
3166_92	35379	Siglec-3	Myeloid cell surface antigen CD33	CD33	P20138	ENSG00000105383	945	HGNC:1659	rs7253355	A	G	-0.0702	0.0119936	0.21238	19	52250589	4.825e-09	TRUE	0.000967454	34.2588
3166_92	35371	Siglec-3	Myeloid cell surface antigen CD33	CD33	P20138	ENSG00000105383	945	HGNC:1659	rs7255024	A	C	-0.1264	0.0182248	0.07814	19	51411263	4.045e-12	TRUE	0.00135817	48.1026
3166_92	35379	Siglec-3	Myeloid cell surface antigen CD33	CD33	P20138	ENSG00000105383	945	HGNC:1659	rs7255306	G	A	0.2062	0.010956	0.26896	19	51837171	5.106e-79	TRUE	0.00991347	354.221
3166_92	35375	Siglec-3	Myeloid cell surface antigen CD33	CD33	P20138	ENSG00000105383	945	HGNC:1659	rs7256201	C	T	-0.4084	0.0108033	0.30826	19	51705039	1e-200	TRUE	0.0388319	1429.1
3166_92	35373	Siglec-3	Myeloid cell surface antigen CD33	CD33	P20138	ENSG00000105383	945	HGNC:1659	rs7257400	T	C	0.0682	0.00988405	0.54377	19	51135051	5.2e-12	TRUE	0.00134421	47.6101
3166_92	35373	Siglec-3	Myeloid cell surface antigen CD33	CD33	P20138	ENSG00000105383	945	HGNC:1659	rs7257934	C	T	0.0905	0.0158631	0.88974	19	51156484	1.163e-08	TRUE	0.000919336	32.5477
3166_92	35370	Siglec-3	Myeloid cell surface antigen CD33	CD33	P20138	ENSG00000105383	945	HGNC:1659	rs7258535	A	G	0.1405	0.0132576	0.15975	19	51307981	3.053e-26	TRUE	0.00316547	112.312
3166_92	35363	Siglec-3	Myeloid cell surface antigen CD33	CD33	P20138	ENSG00000105383	945	HGNC:1659	rs73044695	A	G	0.1572	0.0199661	0.06486	19	51257463	3.453e-15	TRUE	0.00174998	61.9895
3166_92	35363	Siglec-3	Myeloid cell surface antigen CD33	CD33	P20138	ENSG00000105383	945	HGNC:1659	rs73044701	T	C	0.1722	0.0226087	0.04947	19	51259077	2.606e-14	TRUE	0.00163786	58.0114
3166_92	35363	Siglec-3	Myeloid cell surface antigen CD33	CD33	P20138	ENSG00000105383	945	HGNC:1659	rs73046529	T	C	-0.1202	0.0175504	0.08535	19	51266454	7.444e-12	TRUE	0.00132476	46.9069
3166_92	35363	Siglec-3	Myeloid cell surface antigen CD33	CD33	P20138	ENSG00000105383	945	HGNC:1659	rs73046569	A	G	-0.1983	0.0247498	0.04197	19	51285644	1.127e-15	TRUE	0.00181213	64.1949
3166_92	35382	Siglec-3	Myeloid cell surface antigen CD33	CD33	P20138	ENSG00000105383	945	HGNC:1659	rs73049687	A	G	0.1844	0.030563	0.02606	19	51979222	1.605e-09	TRUE	0.00102784	36.4025
3166_92	35380	Siglec-3	Myeloid cell surface antigen CD33	CD33	P20138	ENSG00000105383	945	HGNC:1659	rs73054282	A	G	-0.0784	0.010188	0.36747	19	52640949	1.411e-14	TRUE	0.00167108	59.2185
3166_92	35384	Siglec-3	Myeloid cell surface antigen CD33	CD33	P20138	ENSG00000105383	945	HGNC:1659	rs73056125	T	C	-0.238	0.0352565	0.01927	19	52717165	1.473e-11	TRUE	0.00128628	45.5697
3166_92	35384	Siglec-3	Myeloid cell surface antigen CD33	CD33	P20138	ENSG00000105383	945	HGNC:1659	rs73058855	A	G	0.2015	0.0306496	0.02606	19	52296312	4.888e-11	TRUE	0.00122008	43.2215
3166_92	35373	Siglec-3	Myeloid cell surface antigen CD33	CD33	P20138	ENSG00000105383	945	HGNC:1659	rs73070523	C	T	0.1624	0.0285742	0.0296	19	50827921	1.32e-08	TRUE	0.000912391	32.3017
3166_92	35373	Siglec-3	Myeloid cell surface antigen CD33	CD33	P20138	ENSG00000105383	945	HGNC:1659	rs7343094	C	T	0.1365	0.0142225	0.13941	19	51594543	8.192e-22	TRUE	0.00259739	92.1117
3166_92	35384	Siglec-3	Myeloid cell surface antigen CD33	CD33	P20138	ENSG00000105383	945	HGNC:1659	rs736574	C	T	-0.093	0.0102019	0.3607	19	52054826	7.797e-20	TRUE	0.00234317	83.1009
3166_92	35384	Siglec-3	Myeloid cell surface antigen CD33	CD33	P20138	ENSG00000105383	945	HGNC:1659	rs74536039	A	G	0.1194	0.0203046	0.06191	19	52716143	4.092e-09	TRUE	0.000976364	34.5795
3166_92	35384	Siglec-3	Myeloid cell surface antigen CD33	CD33	P20138	ENSG00000105383	945	HGNC:1659	rs75011734	A	G	0.1702	0.0284069	0.03107	19	52051731	2.079e-09	TRUE	0.00101356	35.8982
3166_92	35373	Siglec-3	Myeloid cell surface antigen CD33	CD33	P20138	ENSG00000105383	945	HGNC:1659	rs750577	T	C	-0.163	0.0226097	0.04951	19	51170978	5.624e-13	TRUE	0.00146724	51.974
3166_92	35383	Siglec-3	Myeloid cell surface antigen CD33	CD33	P20138	ENSG00000105383	945	HGNC:1659	rs75244889	A	C	0.0999	0.0127687	0.18289	19	52685944	5.124e-15	TRUE	0.0017271	61.2123
3166_92	35380	Siglec-3	Myeloid cell surface antigen CD33	CD33	P20138	ENSG00000105383	945	HGNC:1659	rs75353720	T	C	0.3585	0.026866	0.03475	19	51781385	1.284e-40	TRUE	0.00500792	178.062
3166_92	35374	Siglec-3	Myeloid cell surface antigen CD33	CD33	P20138	ENSG00000105383	945	HGNC:1659	rs77008217	T	C	-0.1569	0.0270447	0.03415	19	50951788	6.572e-09	TRUE	0.000950626	33.6575
3166_92	35376	Siglec-3	Myeloid cell surface antigen CD33	CD33	P20138	ENSG00000105383	945	HGNC:1659	rs77485145	T	C	-0.1592	0.0229787	0.04773	19	51555200	4.264e-12	TRUE	0.00135507	47.9992
3166_92	35386	Siglec-3	Myeloid cell surface antigen CD33	CD33	P20138	ENSG00000105383	945	HGNC:1659	rs77651962	T	C	-0.1223	0.0187709	0.07485	19	52360529	7.249e-11	TRUE	0.00119827	42.4506
3166_92	35379	Siglec-3	Myeloid cell surface antigen CD33	CD33	P20138	ENSG00000105383	945	HGNC:1659	rs77681936	T	G	0.4641	0.0328247	0.02231	19	51801506	2.191e-45	TRUE	0.00561894	199.905
3166_92	35385	Siglec-3	Myeloid cell surface antigen CD33	CD33	P20138	ENSG00000105383	945	HGNC:1659	rs78269716	G	A	0.1627	0.0182084	0.07854	19	52035140	4.055e-19	TRUE	0.00225144	79.8424
3166_92	35370	Siglec-3	Myeloid cell surface antigen CD33	CD33	P20138	ENSG00000105383	945	HGNC:1659	rs78441704	T	C	0.1392	0.0236297	0.04564	19	51371390	3.841e-09	TRUE	0.000980227	34.7027
3166_92	35388	Siglec-3	Myeloid cell surface antigen CD33	CD33	P20138	ENSG00000105383	945	HGNC:1659	rs79098837	C	G	0.1716	0.0270233	0.03204	19	52553770	2.152e-10	TRUE	0.00113824	40.3235
3166_92	35377	Siglec-3	Myeloid cell surface antigen CD33	CD33	P20138	ENSG00000105383	945	HGNC:1659	rs79254320	A	G	0.6296	0.0192854	0.06518	19	51721244	1e-200	TRUE	0.0292473	1065.8
3166_92	35381	Siglec-3	Myeloid cell surface antigen CD33	CD33	P20138	ENSG00000105383	945	HGNC:1659	rs79506121	C	T	-0.3941	0.0285256	0.031	19	51950380	2.05e-43	TRUE	0.00536615	190.873
3166_92	35383	Siglec-3	Myeloid cell surface antigen CD33	CD33	P20138	ENSG00000105383	945	HGNC:1659	rs8105105	C	T	0.1435	0.0238393	0.04352	19	52130337	1.75e-09	TRUE	0.00102306	36.2339
3166_92	35377	Siglec-3	Myeloid cell surface antigen CD33	CD33	P20138	ENSG00000105383	945	HGNC:1659	rs8108954	G	T	0.1579	0.0204616	0.06146	19	51888106	1.192e-14	TRUE	0.00168058	59.5504
3166_92	35377	Siglec-3	Myeloid cell surface antigen CD33	CD33	P20138	ENSG00000105383	945	HGNC:1659	rs8110530	T	C	-0.1762	0.0106962	0.70214	19	51885365	5.72e-61	TRUE	0.0076127	271.365
3166_92	35379	Siglec-3	Myeloid cell surface antigen CD33	CD33	P20138	ENSG00000105383	945	HGNC:1659	rs867229	A	G	-0.0801	0.0143698	0.13251	19	52248999	2.487e-08	TRUE	0.000877525	31.0715
3166_92	35371	Siglec-3	Myeloid cell surface antigen CD33	CD33	P20138	ENSG00000105383	945	HGNC:1659	rs885756	A	G	-0.2529	0.031766	0.97533	19	51513415	1.702e-15	TRUE	0.00178884	63.3828
3166_92	35368	Siglec-3	Myeloid cell surface antigen CD33	CD33	P20138	ENSG00000105383	945	HGNC:1659	rs972921	T	A	-0.2303	0.0418879	0.01483	19	51444835	3.841e-08	TRUE	0.000853993	30.2281
19523_215	35388	PARK7	Protein DJ-1	PARK7	Q99497	ENSG00000116288	11315	HGNC:16369	rs12134193	T	C	-0.0791	0.0136739	0.095	1	8176626	7.263e-09	TRUE	0.000944765	33.4631
19523_215	35386	PARK7	Protein DJ-1	PARK7	Q99497	ENSG00000116288	11315	HGNC:16369	rs226251	C	T	0.1128	0.00821346	0.60515	1	8024690	6.392e-43	TRUE	0.00530213	188.61
19523_215	35387	PARK7	Protein DJ-1	PARK7	Q99497	ENSG00000116288	11315	HGNC:16369	rs228651	T	C	-0.0595	0.00833861	0.37272	1	7911099	9.645e-13	TRUE	0.00143682	50.9151
19523_215	35385	PARK7	Protein DJ-1	PARK7	Q99497	ENSG00000116288	11315	HGNC:16369	rs59523164	A	G	0.1261	0.0101238	0.19945	1	7971827	1.3e-35	TRUE	0.00436566	155.148
18174_79	35353	PDC6I	Programmed cell death 6-interacting protein	PDCD6IP	Q8WUM4	ENSG00000170248	10015	HGNC:8766	rs77701548	A	C	-0.13	0.016091	0.06767	3	33944375	6.527e-16	TRUE	0.00184297	65.2711
18174_79	35353	PDC6I	Programmed cell death 6-interacting protein	PDCD6IP	Q8WUM4	ENSG00000170248	10015	HGNC:8766	rs9848859	A	G	-0.0503	0.00853394	0.33512	3	33963571	3.767e-09	TRUE	0.000981767	34.7406
18174_79	35353	PDC6I	Programmed cell death 6-interacting protein	PDCD6IP	Q8WUM4	ENSG00000170248	10015	HGNC:8766	rs9876986	G	A	-0.1121	0.00908611	0.26504	3	33841065	5.689e-35	TRUE	0.00428733	152.214
17333_20	35354	ACADM	Medium-chain specific acyl-CoA dehydrogenase, mitochondrial	ACADM	P11310	ENSG00000117054	34	HGNC:89	rs10443175	T	C	0.0571	0.00975135	0.2057	1	76545413	4.753e-09	TRUE	0.000968963	34.288
17333_20	35356	ACADM	Medium-chain specific acyl-CoA dehydrogenase, mitochondrial	ACADM	P11310	ENSG00000117054	34	HGNC:89	rs11161468	T	C	0.2255	0.00861309	0.30144	1	76192582	4.364e-151	TRUE	0.0190194	685.449
17333_20	35354	ACADM	Medium-chain specific acyl-CoA dehydrogenase, mitochondrial	ACADM	P11310	ENSG00000117054	34	HGNC:89	rs11162078	T	C	-0.0695	0.00858301	0.31201	1	76527952	5.615e-16	TRUE	0.00185128	65.5678
17333_20	35356	ACADM	Medium-chain specific acyl-CoA dehydrogenase, mitochondrial	ACADM	P11310	ENSG00000117054	34	HGNC:89	rs111980323	T	C	0.1933	0.0255531	0.02364	1	76191954	3.889e-14	TRUE	0.00161598	57.224
17333_20	35356	ACADM	Medium-chain specific acyl-CoA dehydrogenase, mitochondrial	ACADM	P11310	ENSG00000117054	34	HGNC:89	rs112271779	A	G	0.1558	0.0188579	0.04642	1	76335269	1.435e-16	TRUE	0.00192696	68.2572
17333_20	35357	ACADM	Medium-chain specific acyl-CoA dehydrogenase, mitochondrial	ACADM	P11310	ENSG00000117054	34	HGNC:89	rs113625666	T	C	0.221	0.0374654	0.01153	1	75989255	3.662e-09	TRUE	0.00098321	34.7956
17333_20	35350	ACADM	Medium-chain specific acyl-CoA dehydrogenase, mitochondrial	ACADM	P11310	ENSG00000117054	34	HGNC:89	rs113973828	A	G	0.1443	0.0251845	0.02557	1	76912629	1.006e-08	TRUE	0.000927893	32.8296
17333_20	35354	ACADM	Medium-chain specific acyl-CoA dehydrogenase, mitochondrial	ACADM	P11310	ENSG00000117054	34	HGNC:89	rs113987609	C	T	0.2342	0.0367678	0.01207	1	75250298	1.894e-10	TRUE	0.00114637	40.5731
17333_20	35356	ACADM	Medium-chain specific acyl-CoA dehydrogenase, mitochondrial	ACADM	P11310	ENSG00000117054	34	HGNC:89	rs114104449	A	G	0.1423	0.0197219	0.04118	1	76231124	5.38e-13	TRUE	0.0014704	52.0611
17333_20	35356	ACADM	Medium-chain specific acyl-CoA dehydrogenase, mitochondrial	ACADM	P11310	ENSG00000117054	34	HGNC:89	rs1144338	C	T	0.0881	0.011033	0.85043	1	76279908	1.404e-15	TRUE	0.00180028	63.7619
17333_20	35356	ACADM	Medium-chain specific acyl-CoA dehydrogenase, mitochondrial	ACADM	P11310	ENSG00000117054	34	HGNC:89	rs115042041	C	G	0.1889	0.0185822	0.04779	1	76184898	2.822e-24	TRUE	0.00291451	103.341
17333_20	35356	ACADM	Medium-chain specific acyl-CoA dehydrogenase, mitochondrial	ACADM	P11310	ENSG00000117054	34	HGNC:89	rs116034618	T	C	-0.1128	0.01124	0.14337	1	76190568	1.063e-23	TRUE	0.00284062	100.713
17333_20	35354	ACADM	Medium-chain specific acyl-CoA dehydrogenase, mitochondrial	ACADM	P11310	ENSG00000117054	34	HGNC:89	rs138909146	A	G	0.1782	0.0288923	0.01876	1	76465880	6.928e-10	TRUE	0.0010749	38.0408
17333_20	35355	ACADM	Medium-chain specific acyl-CoA dehydrogenase, mitochondrial	ACADM	P11310	ENSG00000117054	34	HGNC:89	rs1412716	T	C	0.1341	0.0191756	0.04437	1	76043925	2.686e-12	TRUE	0.00138144	48.9055
17333_20	35356	ACADM	Medium-chain specific acyl-CoA dehydrogenase, mitochondrial	ACADM	P11310	ENSG00000117054	34	HGNC:89	rs141541845	T	C	0.141	0.0227914	0.03073	1	76237019	6.15e-10	TRUE	0.0010814	38.2732
17333_20	35356	ACADM	Medium-chain specific acyl-CoA dehydrogenase, mitochondrial	ACADM	P11310	ENSG00000117054	34	HGNC:89	rs17096782	C	T	-0.1064	0.0161121	0.06612	1	75812191	4.009e-11	TRUE	0.00123199	43.6094
17333_20	35354	ACADM	Medium-chain specific acyl-CoA dehydrogenase, mitochondrial	ACADM	P11310	ENSG00000117054	34	HGNC:89	rs181587356	A	T	0.1591	0.028915	0.01882	1	75507780	3.748e-08	TRUE	0.000855673	30.2757
17333_20	35353	ACADM	Medium-chain specific acyl-CoA dehydrogenase, mitochondrial	ACADM	P11310	ENSG00000117054	34	HGNC:89	rs486115	C	T	0.0558	0.0100738	0.18934	1	76727088	3.04e-08	TRUE	0.000867167	30.6818
17333_20	35356	ACADM	Medium-chain specific acyl-CoA dehydrogenase, mitochondrial	ACADM	P11310	ENSG00000117054	34	HGNC:89	rs56401077	T	C	-0.0893	0.0161683	0.06417	1	76140167	3.33e-08	TRUE	0.000862102	30.505
17333_20	35356	ACADM	Medium-chain specific acyl-CoA dehydrogenase, mitochondrial	ACADM	P11310	ENSG00000117054	34	HGNC:89	rs7513459	G	T	0.0529	0.0091929	0.75443	1	76082773	8.693e-09	TRUE	0.000935752	33.1136
17333_20	35356	ACADM	Medium-chain specific acyl-CoA dehydrogenase, mitochondrial	ACADM	P11310	ENSG00000117054	34	HGNC:89	rs75753585	G	A	-0.1975	0.0202064	0.04168	1	76105925	1.454e-22	TRUE	0.00269492	95.5336
7227_75	35359	COCH	Cochlin	COCH	O43405	ENSG00000100473	1690	HGNC:2180	rs1045644	G	C	0.0679	0.00873985	0.6164	14	31355096	7.91e-15	TRUE	0.00170418	60.3576
7227_75	35360	COCH	Cochlin	COCH	O43405	ENSG00000100473	1690	HGNC:2180	rs111987475	G	C	0.1598	0.0186351	0.05524	14	30877882	9.89e-18	TRUE	0.00207539	73.5343
7227_75	35363	COCH	Cochlin	COCH	O43405	ENSG00000100473	1690	HGNC:2180	rs12431424	A	T	-0.1049	0.0122038	0.14188	14	31318179	8.277e-18	TRUE	0.00208511	73.8858
7227_75	35361	COCH	Cochlin	COCH	O43405	ENSG00000100473	1690	HGNC:2180	rs12433483	A	C	0.1325	0.0119403	0.15185	14	31259516	1.299e-28	TRUE	0.0034705	123.141
7227_75	35356	COCH	Cochlin	COCH	O43405	ENSG00000100473	1690	HGNC:2180	rs12889878	A	C	-0.1867	0.0233449	0.03629	14	31352318	1.27e-15	TRUE	0.00180585	63.9596
7227_75	35361	COCH	Cochlin	COCH	O43405	ENSG00000100473	1690	HGNC:2180	rs140352619	G	T	0.2294	0.0280483	0.02368	14	30568574	2.868e-16	TRUE	0.00188822	66.892
7227_75	35353	COCH	Cochlin	COCH	O43405	ENSG00000100473	1690	HGNC:2180	rs149930427	A	G	0.204	0.0235131	0.03204	14	31970580	4.099e-18	TRUE	0.00212478	75.2731
7227_75	35361	COCH	Cochlin	COCH	O43405	ENSG00000100473	1690	HGNC:2180	rs150921012	A	T	-0.1253	0.0215769	0.04024	14	31135521	6.355e-09	TRUE	0.000952819	33.7228
7227_75	35362	COCH	Cochlin	COCH	O43405	ENSG00000100473	1690	HGNC:2180	rs186156916	A	T	-0.1802	0.0278166	0.0231	14	31306523	9.286e-11	TRUE	0.00118542	41.9663
7227_75	35362	COCH	Cochlin	COCH	O43405	ENSG00000100473	1690	HGNC:2180	rs34401165	A	G	0.2224	0.0358448	0.01379	14	31165832	5.486e-10	TRUE	0.00108751	38.4962
7227_75	35361	COCH	Cochlin	COCH	O43405	ENSG00000100473	1690	HGNC:2180	rs34768432	C	T	0.1287	0.0139173	0.10368	14	30785974	2.299e-20	TRUE	0.00241266	85.5154
7227_75	35361	COCH	Cochlin	COCH	O43405	ENSG00000100473	1690	HGNC:2180	rs35349033	G	A	0.0705	0.00853806	0.44238	14	31103535	1.492e-16	TRUE	0.00192452	68.1804
7227_75	35363	COCH	Cochlin	COCH	O43405	ENSG00000100473	1690	HGNC:2180	rs4981081	T	C	-0.1399	0.0239644	0.03137	14	31328834	5.289e-09	TRUE	0.000962848	34.0801
7227_75	35362	COCH	Cochlin	COCH	O43405	ENSG00000100473	1690	HGNC:2180	rs7159420	G	T	0.4286	0.0128913	0.1198	14	31314355	1e-200	TRUE	0.030313	1105.38
7227_75	35361	COCH	Cochlin	COCH	O43405	ENSG00000100473	1690	HGNC:2180	rs72642543	C	T	-0.1206	0.0147258	0.09126	14	30998415	2.619e-16	TRUE	0.00189327	67.071
7227_75	35361	COCH	Cochlin	COCH	O43405	ENSG00000100473	1690	HGNC:2180	rs74041180	A	G	-0.0521	0.00928921	0.29771	14	31267518	2.039e-08	TRUE	0.000888857	31.4571
7227_75	35357	COCH	Cochlin	COCH	O43405	ENSG00000100473	1690	HGNC:2180	rs76539348	A	G	0.1939	0.0332499	0.01692	14	32069052	5.49e-09	TRUE	0.000960962	34.0075
7227_75	35363	COCH	Cochlin	COCH	O43405	ENSG00000100473	1690	HGNC:2180	rs79411389	T	G	0.088	0.0159546	0.07651	14	30675206	3.475e-08	TRUE	0.000859597	30.4224
7227_75	35362	COCH	Cochlin	COCH	O43405	ENSG00000100473	1690	HGNC:2180	rs79704906	G	A	0.449	0.0204837	0.04389	14	31097257	1.681e-106	TRUE	0.013406	480.479
3038_9	35349	I-TAC	C-X-C motif chemokine 11	CXCL11	O14625	ENSG00000169248	6373	HGNC:10638	rs11097547	G	A	0.0551	0.00966568	0.22359	4	77763070	1.194e-08	TRUE	0.000918516	32.4966
3038_9	35354	I-TAC	C-X-C motif chemokine 11	CXCL11	O14625	ENSG00000169248	6373	HGNC:10638	rs111577590	T	G	0.233	0.0155111	0.0744	4	77127383	5.313e-51	TRUE	0.0063423	225.644
3038_9	35355	I-TAC	C-X-C motif chemokine 11	CXCL11	O14625	ENSG00000169248	6373	HGNC:10638	rs112613787	C	T	-0.1419	0.0210462	0.0399	4	77001883	1.559e-11	TRUE	0.0012842	45.4586
3038_9	35359	I-TAC	C-X-C motif chemokine 11	CXCL11	O14625	ENSG00000169248	6373	HGNC:10638	rs115049627	T	G	0.1543	0.020569	0.03964	4	77579347	6.305e-14	TRUE	0.00158906	56.2738
3038_9	35357	I-TAC	C-X-C motif chemokine 11	CXCL11	O14625	ENSG00000169248	6373	HGNC:10638	rs116839831	T	C	-0.1443	0.0214744	0.03661	4	77351870	1.822e-11	TRUE	0.00127551	45.1533
3038_9	35356	I-TAC	C-X-C motif chemokine 11	CXCL11	O14625	ENSG00000169248	6373	HGNC:10638	rs11727191	T	C	-0.2174	0.0289952	0.02046	4	77423100	6.49e-14	TRUE	0.00158759	56.2169
3038_9	35352	I-TAC	C-X-C motif chemokine 11	CXCL11	O14625	ENSG00000169248	6373	HGNC:10638	rs11935391	A	T	0.1198	0.0135434	0.09754	4	76068648	9.102e-19	TRUE	0.00220855	78.245
3038_9	35357	I-TAC	C-X-C motif chemokine 11	CXCL11	O14625	ENSG00000169248	6373	HGNC:10638	rs12506745	G	T	0.0632	0.00803543	0.45849	4	77220837	3.686e-15	TRUE	0.00174665	61.8609
3038_9	35356	I-TAC	C-X-C motif chemokine 11	CXCL11	O14625	ENSG00000169248	6373	HGNC:10638	rs12511448	C	T	-0.1449	0.0244403	0.02793	4	77774390	3.053e-09	TRUE	0.000993235	35.1498
3038_9	35356	I-TAC	C-X-C motif chemokine 11	CXCL11	O14625	ENSG00000169248	6373	HGNC:10638	rs13117238	A	C	-0.079	0.0103224	0.18567	4	77173914	1.96e-14	TRUE	0.00165398	58.5719
3038_9	35354	I-TAC	C-X-C motif chemokine 11	CXCL11	O14625	ENSG00000169248	6373	HGNC:10638	rs13125558	C	A	0.273	0.00814643	0.39439	4	76852585	1e-200	TRUE	0.030789	1123.03
3038_9	35352	I-TAC	C-X-C motif chemokine 11	CXCL11	O14625	ENSG00000169248	6373	HGNC:10638	rs138177681	A	G	-0.184	0.0244384	0.02746	4	76032775	5.108e-14	TRUE	0.00160105	56.6878
3038_9	35355	I-TAC	C-X-C motif chemokine 11	CXCL11	O14625	ENSG00000169248	6373	HGNC:10638	rs140932685	T	C	-0.1874	0.0173993	0.05721	4	76749354	4.741e-27	TRUE	0.0032706	116.005
3038_9	35354	I-TAC	C-X-C motif chemokine 11	CXCL11	O14625	ENSG00000169248	6373	HGNC:10638	rs141720047	T	C	0.1828	0.0321569	0.01529	4	76844569	1.311e-08	TRUE	0.000913257	32.315
3038_9	35357	I-TAC	C-X-C motif chemokine 11	CXCL11	O14625	ENSG00000169248	6373	HGNC:10638	rs143585145	T	G	-0.248	0.0167693	0.06158	4	77346645	1.727e-49	TRUE	0.00614814	218.712
3038_9	35351	I-TAC	C-X-C motif chemokine 11	CXCL11	O14625	ENSG00000169248	6373	HGNC:10638	rs17000202	T	C	-0.1661	0.0283925	0.02111	4	75997708	4.912e-09	TRUE	0.000967237	34.224
3038_9	35353	I-TAC	C-X-C motif chemokine 11	CXCL11	O14625	ENSG00000169248	6373	HGNC:10638	rs17270586	G	A	0.1272	0.0230695	0.03162	4	76254107	3.512e-08	TRUE	0.00085926	30.4018
3038_9	35355	I-TAC	C-X-C motif chemokine 11	CXCL11	O14625	ENSG00000169248	6373	HGNC:10638	rs185234582	T	C	0.4472	0.0342006	0.0134	4	77021551	4.527e-39	TRUE	0.004813	170.977
3038_9	35355	I-TAC	C-X-C motif chemokine 11	CXCL11	O14625	ENSG00000169248	6373	HGNC:10638	rs188895681	A	G	0.1842	0.0210985	0.03686	4	76764520	2.536e-18	TRUE	0.00215137	76.2212
3038_9	35353	I-TAC	C-X-C motif chemokine 11	CXCL11	O14625	ENSG00000169248	6373	HGNC:10638	rs28509772	C	T	0.06	0.0108201	0.16899	4	76425104	2.936e-08	TRUE	0.000869074	30.7494
[truncated: 43,136 more rows]

## Sheet: Supp. table 2
Supplymentary table 2. The causal effect of proteins on eBMD
						Inverse variance weighted				Weighted median			MR Egger			MR Egger interecpt			Heterogeneity test			Steiger directionality test
Protein_ID	Protein_full_name	UniProt	Encoding_Gene	Ensembl.Gene.ID	Outcome	nsnp	beta	se	pval	beta	se	pval	b	se.y.y	pval.y.y	egger_intercept	se.y	pval.y	Q	Q_df	Q_pval	steiger_pval
13094_75	R-spondin-3	Q9BXY4	RSPO3	ENSG00000146374	Heel bone mineral density || id:ebi-a-GCST006979	17	0.253765	0.0158914	2.11261e-57	0.252187	0.0137113	1.50356e-75	0.227102	0.0428195	8.84246e-05	0.00322374	0.00479387	0.511511	98.6755	16	6.13142e-14	1.07759e-156
8427_118	R-spondin-3	Q9BXY4	RSPO3	ENSG00000146374	Heel bone mineral density || id:ebi-a-GCST006979	23	0.241792	0.0172681	1.51076e-44	0.231477	0.0123541	2.47796e-78	0.246525	0.0402435	4.44932e-06	-0.000582099	0.00444686	0.897099	209.627	22	1.4708e-32	3.01051e-206
6576_1	Ecto-ADP-ribosyltransferase 4	Q93070	ART4	ENSG00000111339	Heel bone mineral density || id:ebi-a-GCST006979	143	-0.0155916	0.0014672	2.23721e-26	-0.0186583	0.00209755	5.82794e-19	-0.0204895	0.00258727	6.44872e-13	0.0014978	0.000656111	0.0239353	216.998	142	5.16452e-05	0
8007_19	Cathepsin B	P07858	CTSB	ENSG00000164733	Heel bone mineral density || id:ebi-a-GCST006979	89	-0.0741466	0.00788436	5.24002e-21	-0.0582262	0.00473872	1.05958e-34	-0.0103137	0.0140762	0.465709	-0.0131246	0.00251992	1.26231e-06	1601.63	88	2.01484e-276	0
3290_50	CD109 antigen	Q6YHK3	CD109	ENSG00000156535	Heel bone mineral density || id:ebi-a-GCST006979	94	-0.0273801	0.00291348	5.57438e-21	-0.0304616	0.00309823	8.2032e-23	-0.0288368	0.00565637	1.82622e-06	0.000375755	0.00124841	0.764104	254.792	93	5.4726e-17	0
9216_100	Plexin-B2	O15031	PLXNB2	ENSG00000196576	Heel bone mineral density || id:ebi-a-GCST006979	76	-0.0288773	0.00320956	2.31342e-19	-0.031406	0.00379088	1.18491e-16	-0.0267822	0.0074917	0.000621421	-0.000434003	0.00140032	0.757485	178.474	75	2.03993e-10	0
3326_58	Cell adhesion molecule 1	Q9BY67	CADM1	ENSG00000182985	Heel bone mineral density || id:ebi-a-GCST006979	13	0.16745	0.0196767	1.73827e-17	0.179526	0.0146045	9.93673e-35	0.153661	0.0522733	0.0134581	0.00138912	0.00484529	0.779675	62.7628	12	7.04558e-09	6.82569e-105
6520_87	Matrix Gla protein	P08493	MGP	ENSG00000111341	Heel bone mineral density || id:ebi-a-GCST006979	26	0.0495181	0.00678049	2.81376e-13	0.0590867	0.0071346	1.21426e-16	0.0603257	0.0169631	0.0016025	-0.00154885	0.00222387	0.492829	53.7206	25	0.000722164	0
10440_26	CXADR-like membrane protein	Q9H6B4	CLMP	ENSG00000166250	Heel bone mineral density || id:ebi-a-GCST006979	14	-0.0551987	0.00786484	2.24408e-12	-0.0555766	0.00848076	5.62948e-11	-0.049682	0.0174169	0.0145547	-0.000711651	0.00198614	0.726336	20.1037	13	0.0926556	3.68485e-242
3331_8	RGM domain family member B	Q6NW40	RGMB	ENSG00000174136	Heel bone mineral density || id:ebi-a-GCST006979	12	-0.0460078	0.00681176	1.43655e-11	-0.0413738	0.00966803	1.87366e-05	-0.0392094	0.0214216	0.097118	-0.000772997	0.00230927	0.744739	8.85602	11	0.63518	6.41585e-204
13983_27	Quinone oxidoreductase	Q08257	CRYZ	ENSG00000116791	Heel bone mineral density || id:ebi-a-GCST006979	97	0.0132079	0.00203619	8.78193e-11	0.0132959	0.00266795	6.24271e-07	0.00972095	0.0039844	0.0165527	0.000956265	0.000939291	0.31123	180.945	96	3.6339e-07	0
5620_13	Peptidyl-glycine alpha-amidating monooxygenase	P19021	PAM	ENSG00000145730	Heel bone mineral density || id:ebi-a-GCST006979	69	-0.0110962	0.00174224	1.90398e-10	-0.0112891	0.00239671	2.47397e-06	-0.00728817	0.00312987	0.022907	-0.00107201	0.000734657	0.149184	81.5894	68	0.124676	0
16825_20	Ataxin-3	P54252	ATXN3	ENSG00000066427	Heel bone mineral density || id:ebi-a-GCST006979	34	-0.0349862	0.00550375	2.06013e-10	-0.0304011	0.00653594	3.29727e-06	-0.0335898	0.0105657	0.00327037	-0.00018474	0.00118639	0.877235	60.972	33	0.00215343	0
18864_7	Trypsin-3	P35030	PRSS3	ENSG00000010438	Heel bone mineral density || id:ebi-a-GCST006979	53	0.0234746	0.00370954	2.48079e-10	0.0254115	0.00358861	1.42954e-12	0.0105396	0.00683133	0.129054	0.00300597	0.00135257	0.030717	141.679	52	3.05641e-10	0
8275_31	Platelet endothelial aggregation receptor 1	Q5VY43	PEAR1	ENSG00000187800	Heel bone mineral density || id:ebi-a-GCST006979	23	-0.0422877	0.00701721	1.67774e-09	-0.0487846	0.00745761	6.08671e-11	-0.0326196	0.0156597	0.0496576	-0.00147497	0.00212925	0.496076	39.8836	22	0.0111553	0
2855_49	Mitogen-activated protein kinase 3	P27361	MAPK3	ENSG00000102882	Heel bone mineral density || id:ebi-a-GCST006979	19	0.0329814	0.00548002	1.76064e-09	0.0333366	0.00723523	4.07466e-06	0.0300155	0.0148754	0.0596811	0.000468281	0.00217387	0.832009	20.0681	18	0.328997	0
4131_72	Fibronectin	P02751	FN1	ENSG00000115414	Heel bone mineral density || id:ebi-a-GCST006979	15	0.0582471	0.00975569	2.36414e-09	0.0608807	0.0126134	1.38837e-06	0.0421112	0.0297384	0.18027	0.00131074	0.0022751	0.57437	17.1581	14	0.247852	2.5602e-142
18397_5	Aldo-keto reductase family 1 member C4	P17516	AKR1C4	ENSG00000198610	Heel bone mineral density || id:ebi-a-GCST006979	88	-0.0187453	0.00316897	3.31336e-09	-0.0134852	0.00367699	0.000244982	-0.0117565	0.00483796	0.0171757	-0.00130642	0.000690696	0.0619302	177.911	87	3.29683e-08	0
5708_1	Liver-expressed antimicrobial peptide 2	Q969E1	LEAP2	ENSG00000164406	Heel bone mineral density || id:ebi-a-GCST006979	38	0.0378019	0.00639537	3.40419e-09	0.0483299	0.00643866	6.08617e-14	0.0514241	0.0116468	8.82531e-05	-0.0020606	0.00148024	0.172442	102.776	37	4.18391e-08	0
3000_66	Mannose-binding protein C	P11226	MBL2	ENSG00000165471	Heel bone mineral density || id:ebi-a-GCST006979	159	0.0263305	0.00446608	3.73166e-09	0.0223655	0.00312377	8.07994e-13	0.0303114	0.00775316	0.000137246	-0.00107979	0.00171743	0.530444	2161.75	158	0	0
4374_45	Growth/differentiation factor 15	Q99988	GDF15	ENSG00000130513	Heel bone mineral density || id:ebi-a-GCST006979	62	0.0248462	0.0042541	5.20366e-09	0.0170078	0.00454576	0.000182953	0.0111548	0.00745974	0.140071	0.00306397	0.00139083	0.0314478	187.688	61	8.08492e-15	0
19558_10	Low-density lipoprotein receptor-related protein 4	O75096	LRP4	ENSG00000134569	Heel bone mineral density || id:ebi-a-GCST006979	50	0.0482903	0.00842063	9.76522e-09	0.0551576	0.00554575	2.62718e-23	0.0589514	0.0174289	0.0014377	-0.00221486	0.00316516	0.487453	450.562	49	2.50062e-66	0
16616_137	Beta-enolase	P13929	ENO3	ENSG00000108515	Heel bone mineral density || id:ebi-a-GCST006979	34	0.0263508	0.00461818	1.15748e-08	0.0268425	0.00620046	1.49714e-05	0.0143022	0.00967381	0.149064	0.00182023	0.0012897	0.167788	45.5703	33	0.0714139	0
3169_70	Alpha-L-iduronidase	P35475	IDUA	ENSG00000127415	Heel bone mineral density || id:ebi-a-GCST006979	72	-0.0456197	0.00811581	1.89757e-08	-0.0437547	0.00485618	2.05833e-19	-0.0585535	0.0140797	8.94249e-05	0.00319953	0.00284875	0.265217	1277.43	71	1.49876e-220	0
5740_17	Roundabout homolog 1	Q9Y6N7	ROBO1	ENSG00000169855	Heel bone mineral density || id:ebi-a-GCST006979	21	0.0328841	0.00586321	2.04031e-08	0.0345061	0.00843156	4.26767e-05	0.00944163	0.0126385	0.464178	0.00336811	0.00162154	0.0515972	21.2497	20	0.382567	0
17224_12	Mimecan	P20774	OGN	ENSG00000106809	Heel bone mineral density || id:ebi-a-GCST006979	62	-0.0237968	0.00427679	2.6339e-08	-0.0273075	0.00491286	2.72311e-08	-0.0203894	0.00919636	0.0304151	-0.000555441	0.00132462	0.676479	139.798	61	4.00646e-08	0
12459_13	Pleckstrin homology domain-containing family A member 1	Q9HB21	PLEKHA1	ENSG00000107679	Heel bone mineral density || id:ebi-a-GCST006979	32	0.0374015	0.00700882	9.48359e-08	0.0473331	0.00763603	5.69487e-10	0.045788	0.0158269	0.00704007	-0.00118629	0.00200201	0.557924	98.4698	31	5.9891e-09	0
7050_5	Neuronal growth regulator 1	Q7Z3B1	NEGR1	ENSG00000172260	Heel bone mineral density || id:ebi-a-GCST006979	6	-0.0591791	0.0110974	9.67669e-08	-0.0592217	0.0129644	4.92313e-06	-0.0266873	0.0408342	0.549065	-0.00336977	0.00406472	0.453693	5.37968	5	0.37132	1.48897e-77
7779_86	Carbohydrate sulfotransferase 11	Q9NPF2	CHST11	ENSG00000171310	Heel bone mineral density || id:ebi-a-GCST006979	50	-0.0199925	0.00379433	1.37134e-07	-0.0191056	0.0048032	6.95916e-05	-0.0263028	0.00810751	0.00214714	0.000982535	0.00111488	0.38255	73.4228	49	0.0135091	0
6451_64	Asporin	Q9BXN1	ASPN	ENSG00000106819	Heel bone mineral density || id:ebi-a-GCST006979	65	0.0207319	0.00394028	1.42856e-07	0.0180387	0.00460251	8.88016e-05	0.0202572	0.00892728	0.026694	8.72461e-05	0.00146933	0.952839	157.117	64	8.52823e-10	0
3352_80	Carbonic anhydrase 6	P23280	CA6	ENSG00000131686	Heel bone mineral density || id:ebi-a-GCST006979	105	-0.0194428	0.00369843	1.46389e-07	-0.0131489	0.00301616	1.30363e-05	-0.0180288	0.00675423	0.00883364	-0.000316062	0.00126083	0.802562	491.219	104	1.3982e-51	0
16890_37	ADAMTS-like protein 1	Q8N6G6	ADAMTSL1	ENSG00000178031	Heel bone mineral density || id:ebi-a-GCST006979	42	0.0281942	0.00548554	2.75134e-07	0.0233745	0.00539466	1.47163e-05	0.033174	0.00993957	0.00183522	-0.000827952	0.00137334	0.549996	130.928	41	2.50188e-11	0
6382_17	Beta-mannosidase	O00462	MANBA	ENSG00000109323	Heel bone mineral density || id:ebi-a-GCST006979	58	0.017693	0.00346342	3.24646e-07	0.0145564	0.0050796	0.00416137	0.0203254	0.00623458	0.00189733	-0.000514646	0.00101055	0.612561	88.9186	57	0.00434953	0
4559_64	Kynureninase	Q16719	KYNU	ENSG00000115919	Heel bone mineral density || id:ebi-a-GCST006979	45	-0.0189098	0.00371696	3.62966e-07	-0.0153874	0.00483739	0.00146808	-0.013558	0.00666728	0.0482017	-0.000861593	0.000890804	0.338849	63.4313	44	0.0289979	0
6393_63	Endoplasmin	P14625	HSP90B1	ENSG00000166598	Heel bone mineral density || id:ebi-a-GCST006979	122	-0.0102319	0.00208005	8.69505e-07	-0.0171037	0.00276554	6.22632e-10	-0.0171521	0.00337732	1.40977e-06	0.00167979	0.000654524	0.011505	222.666	121	5.1979e-08	0
18896_23	Heparan-sulfate 6-O-sulfotransferase 3	Q8IZP7	HS6ST3	ENSG00000185352	Heel bone mineral density || id:ebi-a-GCST006979	6	-0.0569036	0.0115726	8.78372e-07	-0.0513831	0.01534	0.000809243	-0.0737108	0.0499682	0.214198	0.00159531	0.00461396	0.746944	3.45644	5	0.629988	6.78324e-73
14048_7	Interleukin-1 Receptor accessory protein	Q9NPH3	IL1RAP	ENSG00000196083	Heel bone mineral density || id:ebi-a-GCST006979	141	0.00675369	0.00138267	1.03676e-06	0.00663747	0.00196369	0.0007246	0.008087	0.00199083	8.09009e-05	-0.000393879	0.000422952	0.353333	174.783	140	0.0245937	0
16781_2	Cytosolic endo-beta-N-acetylglucosaminidase	Q8NFI3	ENGASE	ENSG00000167280	Heel bone mineral density || id:ebi-a-GCST006979	94	-0.0127866	0.00262351	1.09437e-06	-0.0103943	0.00315115	0.000971739	-0.0149835	0.00419301	0.000563289	0.000465943	0.000692412	0.502681	182.209	93	9.47722e-08	0
15635_4	SPARC-related modular calcium-binding protein 2	Q9H3U7	SMOC2	ENSG00000112562	Heel bone mineral density || id:ebi-a-GCST006979	64	0.0187047	0.00385804	1.24567e-06	0.0197692	0.00461114	1.80873e-05	0.0280736	0.00747151	0.000381831	-0.0013725	0.000940327	0.149449	124.662	63	6.0406e-06	0
3435_53	Fibronectin Fragment 4	P02751	FN1	ENSG00000115414	Heel bone mineral density || id:ebi-a-GCST006979	13	0.0555753	0.0114689	1.26152e-06	0.0554755	0.0142071	9.43153e-05	0.0214669	0.0365092	0.568417	0.00278332	0.00282801	0.346171	18.1475	12	0.111285	1.80682e-121
15526_33	Glutathione synthetase	P48637	GSS	ENSG00000100983	Heel bone mineral density || id:ebi-a-GCST006979	14	0.085074	0.0176698	1.47451e-06	0.0825204	0.0104354	2.62096e-15	0.146201	0.0431254	0.00536657	-0.00721714	0.00468911	0.149716	90.9387	13	9.24097e-14	1.34495e-196
12356_65	Sorcin	P30626	SRI	ENSG00000075142	Heel bone mineral density || id:ebi-a-GCST006979	4	0.0596874	0.012519	1.86304e-06	0.0579027	0.013811	2.75901e-05	0.054292	0.0355384	0.266162	0.000526138	0.0032434	0.886042	0.28403	3	0.963004	5.86476e-57
10569_28	Microfibrillar-associated protein 2	P55001	MFAP2	ENSG00000117122	Heel bone mineral density || id:ebi-a-GCST006979	42	-0.025444	0.00533742	1.86892e-06	-0.0254674	0.00634475	5.97158e-05	-0.0119525	0.0116334	0.310395	-0.0020834	0.00159978	0.20026	85.0058	41	6.53647e-05	0
5069_9	Complement decay-accelerating factor	P08174	CD55	ENSG00000196352	Heel bone mineral density || id:ebi-a-GCST006979	44	0.0163832	0.00344245	1.94378e-06	0.0181595	0.00477667	0.000143701	0.0209287	0.00625328	0.0017317	-0.000796835	0.000914044	0.388291	52.4924	43	0.15211	0
2609_59	Cystatin-C	P01034	CST3	ENSG00000101439	Heel bone mineral density || id:ebi-a-GCST006979	20	0.0244278	0.00518135	2.42224e-06	0.0267992	0.00712798	0.000170101	0.0297974	0.0109679	0.0141386	-0.000797286	0.00143537	0.58542	9.89104	19	0.955583	0
5124_69	Intercellular adhesion molecule 5	Q9UMF0	ICAM5	ENSG00000105376	Heel bone mineral density || id:ebi-a-GCST006979	98	0.0109012	0.00231848	2.57814e-06	0.011284	0.00256636	1.09815e-05	0.0135688	0.00389264	0.000741578	-0.000707471	0.000828612	0.39534	216.333	97	4.33512e-11	0
2571_12	Insulin-like growth factor-binding protein 3	P17936	IGFBP3	ENSG00000146674	Heel bone mineral density || id:ebi-a-GCST006979	39	-0.0217041	0.00465455	3.11651e-06	-0.016672	0.0056992	0.00344107	-0.0202394	0.008662	0.0249852	-0.000212534	0.00105439	0.841356	61.8441	38	0.00857718	0
4479_14	Plasma protease C1 inhibitor	P05155	SERPING1	ENSG00000149131	Heel bone mineral density || id:ebi-a-GCST006979	71	-0.0196042	0.00424008	3.77248e-06	-0.0197746	0.00403983	9.83525e-07	-0.0209167	0.0080654	0.0115952	0.0003336	0.00173918	0.848451	372.969	70	6.74965e-43	0
13109_82	Neuronal growth regulator 1	Q7Z3B1	NEGR1	ENSG00000172260	Heel bone mineral density || id:ebi-a-GCST006979	8	-0.0488432	0.0106459	4.47539e-06	-0.0532091	0.0124105	1.80765e-05	-0.0369748	0.0374911	0.362107	-0.00128084	0.00385464	0.750976	9.28536	7	0.232812	3.12393e-102
17513_11	Annexin A11	P50995	ANXA11	ENSG00000122359	Heel bone mineral density || id:ebi-a-GCST006979	11	-0.0586526	0.0129733	6.15361e-06	-0.057138	0.010852	1.40035e-07	-0.0080047	0.0297139	0.793702	-0.00552493	0.0029825	0.0969716	27.8521	10	0.00190635	1.05251e-163
4459_68	Proprotein convertase subtilisin/kexin type 7	Q16549	PCSK7	ENSG00000160613	Heel bone mineral density || id:ebi-a-GCST006979	178	-0.00893392	0.00198919	7.08133e-06	-0.00592383	0.00280623	0.0347758	-0.00852333	0.00347287	0.0150906	-8.21036e-05	0.000568482	0.885329	308.025	177	3.8512e-09	0
4979_34	Dermatopontin	Q07507	DPT	ENSG00000143196	Heel bone mineral density || id:ebi-a-GCST006979	65	-0.0102509	0.00228344	7.14784e-06	-0.0108704	0.00331388	0.00103706	-0.0156099	0.00383335	0.000132472	0.00106958	0.000619369	0.089088	65.8934	64	0.411161	0
15370_5	BolA-like protein 1	Q9Y3E2	BOLA1	ENSG00000178096	Heel bone mineral density || id:ebi-a-GCST006979	16	-0.0344129	0.00767334	7.30029e-06	-0.0366301	0.00647242	1.51889e-08	-0.030613	0.0127957	0.0313191	-0.000791862	0.00209716	0.711399	49.7765	15	1.30964e-05	0
13123_3	Leucine-rich repeat transmembrane protein FLRT3	Q9NZU0	FLRT3	ENSG00000125848	Heel bone mineral density || id:ebi-a-GCST006979	110	0.00580535	0.00130165	8.19623e-06	0.00442484	0.0019924	0.0263601	0.00664502	0.00245078	0.00779698	-0.000263337	0.000650257	0.686298	120.875	109	0.205666	0
3617_80	Hepatocyte growth factor activator	Q04756	HGFAC	ENSG00000109758	Heel bone mineral density || id:ebi-a-GCST006979	130	0.00682874	0.00153309	8.41958e-06	0.00799374	0.00214003	0.000187456	0.00739661	0.00240781	0.00259863	-0.0001697	0.000553488	0.759646	193.809	129	0.000194905	0
18188_12	Glycine amidinotransferase, mitochondrial	P50440	GATM	ENSG00000171766	Heel bone mineral density || id:ebi-a-GCST006979	15	-0.0314672	0.00708351	8.89969e-06	-0.0248664	0.00977994	0.0110032	-0.0287638	0.0167073	0.108828	-0.00030469	0.00170545	0.860961	6.55402	14	0.950541	5.85936e-205
14076_74	Cystatin-S	P01036	CST4	ENSG00000101441	Heel bone mineral density || id:ebi-a-GCST006979	43	-0.0156147	0.00354901	1.08382e-05	-0.0143052	0.005208	0.0060186	-0.000984592	0.00719865	0.891878	-0.00222898	0.000954202	0.0244635	36.2846	42	0.719275	0
13552_7	Switch-associated protein 70	Q9UH65	SWAP70	ENSG00000133789	Heel bone mineral density || id:ebi-a-GCST006979	54	0.0157055	0.00357726	1.13162e-05	0.0152282	0.0046132	0.00096341	0.00946975	0.00637052	0.143186	0.00138218	0.00117041	0.242999	118.69	53	6.12632e-07	0
8024_64	Protein-tyrosine sulfotransferase 2	O60704	TPST2	ENSG00000128294	Heel bone mineral density || id:ebi-a-GCST006979	12	0.0384044	0.00886361	1.47213e-05	0.0533246	0.0109836	1.20422e-06	0.091801	0.0227355	0.00236963	-0.00550331	0.00219377	0.0309866	13.5384	11	0.259596	3.69128e-146
15509_2	Alpha-N-acetylglucosaminidase	P54802	NAGLU	ENSG00000108784	Heel bone mineral density || id:ebi-a-GCST006979	55	-0.0242471	0.00565491	1.80447e-05	-0.0165521	0.00394936	2.77634e-05	-0.00973611	0.00767009	0.209858	-0.0038482	0.0014538	0.0106701	316.059	54	1.01765e-38	0
8099_42	Spondin-2	Q9BUD6	SPON2	ENSG00000159674	Heel bone mineral density || id:ebi-a-GCST006979	39	-0.0717848	0.0167562	1.83495e-05	-0.0566894	0.00957218	3.17462e-09	-0.0255235	0.0337013	0.45364	-0.00758762	0.00482522	0.12435	820.892	38	9.93946e-148	0
15475_4	Phospholipid transfer protein	P55058	PLTP	ENSG00000100979	Heel bone mineral density || id:ebi-a-GCST006979	78	-0.0151982	0.00354921	1.85107e-05	-0.024228	0.00404856	2.17244e-09	-0.0248462	0.00657077	0.000308721	0.00184216	0.00106135	0.0866754	170.003	77	5.7104e-09	0
11117_2	Spermatogenesis-associated protein 20	Q8TB22	SPATA20	ENSG00000006282	Heel bone mineral density || id:ebi-a-GCST006979	49	0.0268283	0.00628903	1.99103e-05	0.0309983	0.00559456	3.01105e-08	0.0243593	0.0123619	0.0546864	0.000349788	0.00150245	0.816919	166.645	48	5.20232e-15	0
3434_34	Fibronectin Fragment 3	P02751	FN1	ENSG00000115414	Heel bone mineral density || id:ebi-a-GCST006979	12	0.0542893	0.012745	2.04743e-05	0.0490656	0.0133682	0.000242249	0.00878923	0.0409003	0.834169	0.00382693	0.00327442	0.269617	18.9293	11	0.0623737	8.65994e-114
8660_5	Olfactomedin-like protein 3	Q9NRN5	OLFML3	ENSG00000116774	Heel bone mineral density || id:ebi-a-GCST006979	3	-0.106745	0.0250777	2.07569e-05	-0.0999688	0.020828	1.58884e-06	-0.0297159	0.133449	0.860515	-0.00592616	0.00999484	0.659282	5.20109	2	0.0742333	4.90189e-31
9297_12	UDP-GlcNAc:betaGal beta-1,3-N-acetylglucosaminyltransferase 8	Q7Z7M8	B3GNT8	ENSG00000177191	Heel bone mineral density || id:ebi-a-GCST006979	114	0.0122218	0.00287635	2.14663e-05	0.0102097	0.00297004	0.000586945	0.0163462	0.0048958	0.00114304	-0.00108576	0.00104315	0.300188	357.947	113	3.05838e-27	0
6897_38	Galactosylgalactosylxylosylprotein 3-beta-glucuronosyltransferase 3	O94766	B3GAT3	ENSG00000149541	Heel bone mineral density || id:ebi-a-GCST006979	26	0.0387494	0.00918721	2.46748e-05	0.0383027	0.00717982	9.56682e-08	0.0644948	0.0174361	0.00112332	-0.00368245	0.00214875	0.099461	87.4739	25	7.36022e-09	0
17329_2	3-hydroxybutyrate dehydrogenase type 2	Q9BUT1	BDH2	ENSG00000164039	Heel bone mineral density || id:ebi-a-GCST006979	15	0.0330012	0.00786291	2.70387e-05	0.0379675	0.00764205	6.75645e-07	0.0564458	0.0166046	0.00474763	-0.00362132	0.00229037	0.137868	30.2737	14	0.00699608	0
2994_71	Interleukin-1 receptor-like 2	Q9HB29	IL1RL2	ENSG00000115598	Heel bone mineral density || id:ebi-a-GCST006979	16	0.0263124	0.006311	3.05549e-05	0.0235552	0.00830831	0.00458064	0.00861944	0.0137737	0.54152	0.00215352	0.00150308	0.173881	16.1022	15	0.375289	7.8756e-262
3181_50	Cathepsin S	P25774	CTSS	ENSG00000163131	Heel bone mineral density || id:ebi-a-GCST006979	27	0.0259295	0.00625147	3.35761e-05	0.0251486	0.00512302	9.15739e-07	0.0364352	0.012197	0.00622611	-0.00202968	0.00202347	0.325438	113.222	26	7.40579e-13	0
8245_27	Intercellular adhesion molecule 5	Q9UMF0	ICAM5	ENSG00000105376	Heel bone mineral density || id:ebi-a-GCST006979	93	0.0106063	0.00256553	3.56279e-05	0.0114906	0.00266987	1.67899e-05	0.0150792	0.00419098	0.000521191	-0.00118899	0.000883214	0.181581	240.096	92	3.61174e-15	0
2837_3	Hepatocyte growth factor receptor	P08581	MET	ENSG00000105976	Heel bone mineral density || id:ebi-a-GCST006979	16	-0.0436091	0.0105974	3.87085e-05	-0.0327831	0.0114965	0.00435041	0.00933281	0.0311759	0.769064	-0.00647591	0.00361631	0.0949731	32.3612	15	0.00574716	2.67717e-193
2962_50	Parathyroid hormone-related protein	P12272	PTHLH	ENSG00000087494	Heel bone mineral density || id:ebi-a-GCST006979	7	0.118032	0.0288741	4.35449e-05	0.0998356	0.0262011	0.000138768	0.152237	0.083164	0.126677	-0.00290759	0.00655906	0.676077	41.2803	6	2.54982e-07	1.28977e-79
4834_61	Ephrin type-A receptor 2	P29317	EPHA2	ENSG00000142627	Heel bone mineral density || id:ebi-a-GCST006979	23	0.0361258	0.00888133	4.74968e-05	0.0327119	0.0093712	0.000481779	0.000548914	0.0167292	0.974135	0.00442399	0.00182462	0.0244318	47.492	22	0.00126554	2.00226e-293
18831_6	Leucine-rich repeats and immunoglobulin-like domains protein 1	Q96JA1	LRIG1	ENSG00000144749	Heel bone mineral density || id:ebi-a-GCST006979	107	-0.0109333	0.00268809	4.7561e-05	-0.0118246	0.00353276	0.000816513	-0.0185846	0.00461889	0.000108324	0.00154536	0.000764114	0.0456748	190.128	106	9.93908e-07	0
6467_65	Protein O-glucosyltransferase 1	Q8NBL1	POGLUT1	ENSG00000163389	Heel bone mineral density || id:ebi-a-GCST006979	18	-0.0322267	0.00795527	5.10012e-05	-0.0318417	0.0074919	2.13631e-05	-0.0240799	0.0145641	0.117738	-0.00106531	0.00158391	0.510811	38.2251	17	0.00228852	0
6713_4	Low-density lipoprotein receptor-related protein 11	Q86VZ4	LRP11	ENSG00000120256	Heel bone mineral density || id:ebi-a-GCST006979	148	0.00695491	0.00172078	5.30589e-05	0.00780736	0.00248122	0.00165193	0.00877318	0.00287624	0.00271643	-0.00041947	0.000531308	0.431098	221.96	147	6.39612e-05	0
9335_28	Pregnancy-specific beta-1-glycoprotein 9	Q00887	PSG9	ENSG00000183668	Heel bone mineral density || id:ebi-a-GCST006979	16	-0.0323123	0.00799862	5.35131e-05	-0.0267041	0.0117596	0.023157	-0.0267184	0.0146389	0.0893831	-0.000632186	0.00138561	0.655206	14.0322	15	0.523087	2.97111e-180
15560_52	Transcobalamin-2	P20062	TCN2	ENSG00000185339	Heel bone mineral density || id:ebi-a-GCST006979	117	0.00713496	0.00177145	5.63153e-05	0.00731689	0.00179516	4.58366e-05	7.47693e-06	0.00361281	0.998352	0.0029552	0.0013125	0.0262483	433.319	116	3.70902e-38	NA
4328_2	Brother of CDO	Q9BWV1	BOC	ENSG00000144857	Heel bone mineral density || id:ebi-a-GCST006979	22	0.0322355	0.00802023	5.83784e-05	0.0432956	0.00836567	2.27432e-07	0.0415743	0.0146719	0.0102638	-0.00139829	0.00183157	0.454112	45.9681	21	0.00129035	0
4548_4	Galactoside 3(4)-L-fucosyltransferase	P21217	FUT3	ENSG00000171124	Heel bone mineral density || id:ebi-a-GCST006979	88	0.0131765	0.0033104	6.88135e-05	0.017712	0.00404065	1.16808e-05	0.00898034	0.00600547	0.138481	0.000887357	0.0010588	0.40431	181.912	87	1.12653e-08	0
5465_32	Heparan-sulfate 6-O-sulfotransferase 1	O60243	HS6ST1	ENSG00000136720	Heel bone mineral density || id:ebi-a-GCST006979	16	-0.0444446	0.0113205	8.63573e-05	-0.0683134	0.0111628	9.37256e-10	-0.059556	0.0314812	0.0793871	0.00160717	0.00311228	0.613637	44.4214	15	9.44445e-05	3.9343e-207
9322_15	Reticulocalbin-1	Q15293	RCN1	ENSG00000049449	Heel bone mineral density || id:ebi-a-GCST006979	5	-0.0572071	0.0145794	8.71541e-05	-0.0600216	0.0138985	1.57037e-05	-0.0548947	0.0381132	0.245412	-0.000251416	0.00371852	0.950349	7.0514	4	0.133197	5.72063e-78
3221_54	Secreted frizzled-related protein 1	Q8N474	SFRP1	ENSG00000104332	Heel bone mineral density || id:ebi-a-GCST006979	29	0.025554	0.00651396	8.74676e-05	0.0311533	0.00788554	7.79269e-05	0.0487107	0.0172836	0.00892499	-0.00293009	0.0020319	0.160789	54.9752	28	0.00171171	0
3232_28	Tartrate-resistant acid phosphatase type 5	P13686	ACP5	ENSG00000102575	Heel bone mineral density || id:ebi-a-GCST006979	19	-0.0193326	0.00493407	8.92159e-05	-0.0197832	0.00610035	0.00118291	-0.0223693	0.0112632	0.0633956	0.00052744	0.00174746	0.766441	23.1316	18	0.185584	0
7928_183	Protein-tyrosine sulfotransferase 1	O60507	TPST1	ENSG00000169902	Heel bone mineral density || id:ebi-a-GCST006979	23	0.0194699	0.00497199	9.00597e-05	0.0187529	0.00580925	0.00124608	0.014574	0.00900973	0.120675	0.00102741	0.00156752	0.519304	40.1185	22	0.0104722	0
5021_13	Inorganic pyrophosphatase	Q15181	PPA1	ENSG00000180817	Heel bone mineral density || id:ebi-a-GCST006979	16	0.0259923	0.00664225	9.1088e-05	0.0262807	0.00909752	0.00386747	0.0029457	0.016612	0.861794	0.00309031	0.00204168	0.15237	8.34093	15	0.909388	2.97835e-261
14079_14	Interleukin-18 receptor 1	Q13478	IL18R1	ENSG00000115604	Heel bone mineral density || id:ebi-a-GCST006979	72	0.00793622	0.00204547	0.000104497	0.00816893	0.00303678	0.00714525	0.0078109	0.00350467	0.0290459	3.07015e-05	0.000694647	0.964873	85.9121	71	0.10968	0
19237_17	D-dopachrome decarboxylase	P30046	DDT	ENSG00000099977	Heel bone mineral density || id:ebi-a-GCST006979	6	0.0479127	0.0123791	0.000108629	0.041508	0.0127679	0.00115017	0.0377217	0.0207517	0.14325	0.00149474	0.00234987	0.559291	7.38395	5	0.193615	2.80829e-96
5131_15	Tumor necrosis factor receptor superfamily member 19	Q9NS68	TNFRSF19	ENSG00000127863	Heel bone mineral density || id:ebi-a-GCST006979	7	-0.138317	0.0358439	0.00011391	-0.145646	0.0183883	2.36377e-15	-0.0154871	0.122756	0.90452	-0.0121572	0.0116287	0.343698	63.5313	6	8.60112e-12	2.51258e-62
6388_21	Coiled-coil domain-containing protein 126	Q96EE4	CCDC126	ENSG00000169193	Heel bone mineral density || id:ebi-a-GCST006979	33	0.0173379	0.00452759	0.000128463	0.0166237	0.00603499	0.00587718	0.0124303	0.00912599	0.18299	0.000730312	0.00117537	0.538913	45.4622	32	0.0578948	0
4920_10	Lysozyme C	P61626	LYZ	ENSG00000090382	Heel bone mineral density || id:ebi-a-GCST006979	101	0.0106038	0.00277058	0.000129563	0.0149502	0.00353816	2.38503e-05	0.00690148	0.00531873	0.197447	0.000655632	0.00080349	0.41647	183.23	100	7.69355e-07	0
15573_110	Neurocan core protein	O14594	NCAN	ENSG00000130287	Heel bone mineral density || id:ebi-a-GCST006979	12	-0.0321876	0.00843474	0.000135591	-0.0364923	0.0115525	0.00158404	-0.0547138	0.0175535	0.01093	0.0028848	0.00197144	0.174096	10.4163	11	0.493372	2.07419e-131
8773_172	EMILIN-3	Q9NT22	EMILIN3	ENSG00000183798	Heel bone mineral density || id:ebi-a-GCST006979	39	-0.0342301	0.00907441	0.000161843	-0.0247717	0.00679946	0.00026929	-0.0259464	0.01497	0.0913836	-0.00156562	0.00224134	0.48922	253.07	38	1.39985e-33	0
5139_32	Netrin receptor UNC5C	O95185	UNC5C	ENSG00000182168	Heel bone mineral density || id:ebi-a-GCST006979	25	-0.0253131	0.00673774	0.000172019	-0.0246964	0.0084502	0.00347136	-0.00727462	0.0166008	0.665323	-0.00218527	0.00184104	0.247352	45.3138	24	0.00534703	0
9837_60	NAD(P)H dehydrogenase [quinone] 1	P15559	NQO1	ENSG00000181019	Heel bone mineral density || id:ebi-a-GCST006979	63	0.0131455	0.00351514	0.000184261	0.0162456	0.00342453	2.09647e-06	0.0111195	0.00579792	0.0598156	0.000680993	0.00154391	0.660711	272.688	62	3.22723e-28	0
4929_55	Sex hormone-binding globulin	P04278	SHBG	ENSG00000129214	Heel bone mineral density || id:ebi-a-GCST006979	21	-0.0487205	0.0130578	0.000190606	-0.0269283	0.00996096	0.00686384	-0.0769729	0.034586	0.0383491	0.00347338	0.0039337	0.388283	116.039	20	1.53624e-15	0
15516_12	Serum amyloid A-4 protein	P35542	SAA4	ENSG00000148965	Heel bone mineral density || id:ebi-a-GCST006979	98	-0.00601937	0.00161402	0.000191921	-0.004781	0.00229976	0.0376254	-0.00161993	0.00255984	0.528352	-0.0011783	0.0005387	0.0311487	129.377	97	0.0156363	0
5430_66	Tyrosine-protein phosphatase non-receptor type substrate 1	P78324	SIRPA	ENSG00000198053	Heel bone mineral density || id:ebi-a-GCST006979	227	0.00425836	0.00115183	0.000218119	0.00511967	0.0018973	0.00696742	0.00214512	0.00191033	0.262672	0.000572539	0.00041338	0.167418	281.704	226	0.00690674	0
8014_359	Glycoprotein endo-alpha-1,2-mannosidase	Q5SRI9	MANEA	ENSG00000172469	Heel bone mineral density || id:ebi-a-GCST006979	82	-0.00438771	0.00119126	0.000230283	-0.00348507	0.0018148	0.0548131	-0.0059031	0.00181368	0.00166438	0.000670078	0.000605363	0.271653	90.0476	81	0.230282	0
2665_26	Tumor necrosis factor receptor superfamily member 17	Q02223	TNFRSF17	ENSG00000048462	Heel bone mineral density || id:ebi-a-GCST006979	5	0.0573747	0.0155836	0.000231648	0.0586735	0.0142822	3.9882e-05	0.0421085	0.0398196	0.36791	0.00196438	0.0046042	0.698399	8.72885	4	0.0682462	3.13794e-83
10490_3	Dolichyl-diphosphooligosaccharide--protein glycosyltransferase subunit 1	P04843	RPN1	ENSG00000163902	Heel bone mineral density || id:ebi-a-GCST006979	5	0.0567843	0.0155031	0.000249497	0.0490165	0.0136815	0.000340086	0.0333245	0.0653882	0.645427	0.00268474	0.00721002	0.734372	6.74674	4	0.149892	1.54236e-65
2771_35	Insulin-like growth factor-binding protein 1	P08833	IGFBP1	ENSG00000146678	Heel bone mineral density || id:ebi-a-GCST006979	3	-0.0642786	0.0175748	0.000254756	-0.0625034	0.0198162	0.00160964	0.0595148	0.510979	0.926184	-0.00922424	0.0380521	0.848597	0.0684687	2	0.966345	2.41642e-34
9940_35	Dual specificity phosphatase 28	Q4G0W2	DUSP28	ENSG00000188542	Heel bone mineral density || id:ebi-a-GCST006979	19	-0.0177158	0.0048456	0.000256123	-0.0179134	0.00644451	0.00544199	-0.0109847	0.00752628	0.162656	-0.00118387	0.00101289	0.258608	15.261	18	0.643975	0
18343_10	Peroxisomal 2,4-dienoyl-CoA reductase	Q9NUI1	DECR2	ENSG00000274296	Heel bone mineral density || id:ebi-a-GCST006979	82	-0.018307	0.00502697	0.000270773	-0.0207238	0.00444328	3.10026e-06	-0.0249731	0.0105883	0.0207872	0.00125553	0.00175365	0.476106	351.227	81	2.4696e-35	0
15452_5	5'-Nucleotidase	P21589	NT5E	ENSG00000135318	Heel bone mineral density || id:ebi-a-GCST006979	45	-0.0155963	0.00429916	0.000285887	-0.0186412	0.00506298	0.000231531	0.00114853	0.00721245	0.874223	-0.00333566	0.00119534	0.00781453	119.95	44	5.80496e-09	0
3622_33	Legumain	Q99538	LGMN	ENSG00000100600	Heel bone mineral density || id:ebi-a-GCST006979	20	-0.0217675	0.00605335	0.000323211	-0.0170308	0.00804	0.0341535	-0.0102857	0.0121578	0.408651	-0.00165616	0.00152323	0.291262	24.1123	19	0.19188	0
19143_38	NADH-cytochrome b5 reductase 2	Q6BCY4	CYB5R2	ENSG00000166394	Heel bone mineral density || id:ebi-a-GCST006979	38	0.0168192	0.00467811	0.000324028	0.0140272	0.00641541	0.02878	0.0135963	0.0103574	0.197589	0.000401076	0.00114639	0.728482	58.9013	37	0.0124835	0
11696_7	Cellular retinoic acid-binding protein 2	P29373	CRABP2	ENSG00000143320	Heel bone mineral density || id:ebi-a-GCST006979	23	-0.0250928	0.00700011	0.000337561	-0.0246463	0.00624711	7.97209e-05	-0.0292287	0.013756	0.04564	0.00066953	0.00190303	0.728476	51.4004	22	0.000378034	0
13669_6	Fibroblast growth factor receptor 3	P22607	FGFR3	ENSG00000068078	Heel bone mineral density || id:ebi-a-GCST006979	24	0.0464904	0.0129829	0.000342408	0.0308694	0.00817687	0.00015987	0.013451	0.0323089	0.681205	0.00418769	0.00375373	0.276628	131.767	23	3.03973e-17	0
9076_25	Proenkephalin-A	P01210	PENK	ENSG00000181195	Heel bone mineral density || id:ebi-a-GCST006979	91	0.0102636	0.00287992	0.000365448	0.00759607	0.00329881	0.0212975	0.00591847	0.00613888	0.337611	0.000967899	0.00120697	0.424733	229.118	90	4.23835e-14	0
4430_44	Collectin-11	Q9BWP8	COLEC11	ENSG00000118004	Heel bone mineral density || id:ebi-a-GCST006979	120	-0.00739549	0.00207883	0.000374371	-0.00705189	0.003079	0.0220031	-0.00210512	0.00432992	0.627741	-0.000841658	0.000604272	0.166285	107.381	119	0.769009	0
3173_49	N-acylethanolamine-hydrolyzing acid amidase	Q02083	NAAA	ENSG00000138744	Heel bone mineral density || id:ebi-a-GCST006979	101	-0.00698894	0.00197083	0.000390846	-0.00893238	0.00261643	0.000640264	-0.00819323	0.00348156	0.0205832	0.000295426	0.00070267	0.675081	141.034	100	0.00433646	0
8794_13	Dipeptidase 1	P16444	DPEP1	ENSG00000015413	Heel bone mineral density || id:ebi-a-GCST006979	98	-0.0125061	0.00355515	0.000435249	-0.0114476	0.00353156	0.001189	-0.0252011	0.00709866	0.000598342	0.00236629	0.0011514	0.0425826	343.345	97	3.01325e-29	0
13682_47	Macrophage colony-stimulating factor 1 receptor	P07333	CSF1R	ENSG00000182578	Heel bone mineral density || id:ebi-a-GCST006979	8	-0.0365014	0.0103809	0.00043775	-0.0302408	0.0123729	0.0145207	-0.0179046	0.037633	0.651066	-0.00210617	0.00407696	0.623915	10.2449	7	0.175114	1.71825e-121
11178_21	Sushi, von Willebrand factor type A, EGF and pentraxin domain-containing protein 1	Q4LDE5	SVEP1	ENSG00000165124	Heel bone mineral density || id:ebi-a-GCST006979	82	0.0169371	0.00482784	0.000451105	0.0228869	0.00441846	2.22064e-07	0.0319674	0.00839645	0.000274054	-0.00256068	0.00118289	0.0333866	335.803	81	9.48803e-33	0
4141_79	C-X-C motif chemokine 10	P02778	CXCL10	ENSG00000169245	Heel bone mineral density || id:ebi-a-GCST006979	3	0.0625402	0.0178598	0.000462244	0.0684453	0.0204932	0.000838068	0.019723	0.0621405	0.804343	0.00372665	0.00518027	0.60299	0.796301	2	0.671561	4.36744e-30
9017_58	Lactase-phlorizin hydrolase	P09848	LCT	ENSG00000115850	Heel bone mineral density || id:ebi-a-GCST006979	54	0.00495152	0.00141804	0.000479748	0.00190232	0.00184735	0.303126	-0.00331954	0.0022449	0.145251	0.00411046	0.000935676	5.52133e-05	75.4812	53	0.0229174	0
11288_26	Cytosolic purine 5'-nucleotidase	P49902	NT5C2	ENSG00000076685	Heel bone mineral density || id:ebi-a-GCST006979	10	-0.0650463	0.0188555	0.000561172	-0.0757445	0.0138363	4.39214e-08	-0.139179	0.0433161	0.0123665	0.00767349	0.00413604	0.100659	41.3386	9	4.33982e-06	9.99387e-118
4151_6	Plasminogen	P00747	PLG	ENSG00000122194	Heel bone mineral density || id:ebi-a-GCST006979	35	0.0151392	0.00439395	0.000570068	0.017729	0.00622172	0.00437836	0.0112753	0.00874584	0.206287	0.000523387	0.00102046	0.611442	35.8665	34	0.380973	0
6998_106	Aspartyl/asparaginyl beta-hydroxylase	Q12797	ASPH	ENSG00000198363	Heel bone mineral density || id:ebi-a-GCST006979	10	-0.0343774	0.010005	0.000590299	-0.0269763	0.0129521	0.0372723	-0.0208355	0.0216789	0.364648	-0.00150126	0.00213208	0.501331	7.28518	9	0.607454	2.87778e-112
[truncated: 1,124 more rows]

## Sheet: Supp. table 3
Supplymentary table 3. The causal effect of proteins on osteoporosis-related traits
						Inverse variance weighted				Weighted median			MR Egger			MR Egger interecpt			Heterogeneity test
[truncated: 356 more rows]

## Sheet: Supp. table 4
Supplymentary table 4: Correlations between the genetically predicted causal effects (beta value) of identified proteins on osteoporosis-related traits.
[truncated: 6 more rows]

[truncated: 6 more sheets: Supp. table 5, Supp. table 6, Supp. table 7, Supp. table 8, Supp. figure 1, Supp. figure 2]
